# Supplementary material for: ThermomiR-377-3p-induced Suppression of Cirbp Expression Is Required for Effective Elimination of Cancer Cells and Cancer Stem-like Cells by Hyperthermia
Source: Research Square preprint supplement (doi:10.21203/rs.3.rs-917435/v1), 2021-09-28
Supplement: Supplementary file 1 [file a87f3efef4def8e08f3ec4b0.xlsx]

## Sheet: Table S3
Gene symbol	Description (Full name)	NPC cells+42℃	NPC cells+42℃	NPC cells+42℃	NPC cells	NPC cells	NPC cells	logFC	FC	logCPM	F	PValue	FDR
HSPA7	heat shock protein family A (Hsp70) member 7 (pseudogene)	9.46779	7.95486	0	0	0	0	11.5256	2948.13	2.51317	11.7246	0.0201617	0.0368981
SCGB3A2	secretoglobin family 3A member 2	7.01831	4.65183	4.98913	0	0	0	10.5953	1547.04	1.59971	232.399	1.71834e-06	0.000146979
RP11-149I23.3		4.20204	4.81224	2.91782	0	0	0	10.0427	1054.78	1.05872	155.659	6.40085e-06	0.000236196
HSPA6	heat shock protein family A (Hsp70) member 6	147.66	144.04	0.152497	0.198034	0.0551496	0.027717	9.9785	1008.85	6.86873	17.8993	0.00417972	0.0106502
ADAM22	ADAM metallopeptidase domain 22	0.215901	0.251852	0.133377	0	0	0	9.32564	641.648	0.369062	99.882	2.6821e-05	0.000413121
AC016738.3		1.86992	1.21827	1.95739	0	0	0	8.67543	408.85	-0.233648	85.0605	4.46952e-05	0.00053297
SPINK4	serine peptidase inhibitor Kazal type 4	1.5102	2.99857	2.48788	0	0	0	8.64517	400.365	-0.273565	69.5974	8.39483e-05	0.000763794
TRPM2-AS	TRPM2 antisense RNA	0.75411	0.313725	0.933376	0	0	0	8.61905	393.181	-0.281518	60.5761	0.000129116	0.000976872
ALPI	alkaline phosphatase, intestinal	7.48423	3.96138	33.863	0.0668985	0.0496807	0	8.47678	356.257	4.28157	59.6216	4.1984e-05	0.00051928
PRSS56	serine protease 56	0.172188	0.738477	0.743819	0	0	0	8.43504	346.098	-0.470675	38.3898	0.000510191	0.00234852
ZC3HAV1L	zinc finger CCCH-type containing, antiviral 1 like	0.939026	0.894954	0.412517	0	0	0	8.4281	344.437	-0.467288	57.4411	0.00015204	0.00108024
ZFP42	ZFP42 zinc finger protein	0.392522	0.492236	0.544535	0	0	0	8.36719	330.198	-0.523509	72.372	7.42995e-05	0.000710977
RP11-234B24.2		1.20812	1.64862	0.0482481	0	0	0	8.32871	321.509	-0.566406	17.4973	0.00445554	0.0111711
RP11-707P17.2		0.934058	1.29392	0.667986	0	0	0	8.32568	320.834	-0.565313	59.7797	0.00013449	0.00100141
ZNF613	zinc finger protein 613	0.313139	0.339138	0.297011	0	0	0	8.31663	318.827	-0.568792	72.6687	7.33547e-05	0.000707163
pRNA		1.57512	1.23232	0.129096	0	0	0	8.23208	300.679	-0.643459	23.3093	0.00208979	0.00633559
LONRF2	LON peptidase N-terminal domain and ring finger 2	0.0827015	0.117292	0.0302758	0	0	0	8.14405	282.881	-0.731883	37.8848	0.000530384	0.00241484
TMEM133	Rho GTPase activating protein 42	0.533814	0.451859	0.678834	0	0	0	8.13677	281.456	-0.726692	64.2397	0.000107686	0.000879481
SNORA29	small nucleolar RNA, H/ACA box 29	11.758	10.5057	0.215221	0	0	0	8.1144	277.127	-0.752053	15.332	0.00619741	0.0143656
PCDHGB8P	protocadherin gamma subfamily B, 8 pseudogene	0.611157	0.386798	0.083901	0	0	0	8.08555	271.639	-0.770892	28.1238	0.00124598	0.00433477
KCNS1	potassium voltage-gated channel modifier subfamily S member 1	0.241827	0.396132	0	0	0	0	8.00778	257.384	-0.859351	11.6029	0.0125583	0.0252111
AC064834.2		1.3879	1.34583	0.638067	0	0	0	7.97076	250.863	-0.879198	46.662	0.000285799	0.00161461
RP11-179A10.1		0.0449022	0.552765	0.805465	0	0	0	7.80731	223.994	-1.03344	17.9346	0.00416762	0.0106297
SLC12A3	solute carrier family 12 member 3	29.2243	23.4292	23.2174	0.327651	0	0.0212676	7.73789	213.471	6.28681	52.8561	6.57179e-05	0.000668247
MUC13	mucin 13, cell surface associated	19.712	47.7049	96.1452	0.377416	0.224223	0.244161	7.57255	190.356	6.57212	135.581	1.63641e-06	0.000146979
ABCC2	ATP binding cassette subfamily C member 2	27.805	30.1251	23.1784	0.343753	0.0734369	0.105451	7.27185	154.541	6.4064	173.822	4.47545e-07	9.84906e-05
RP11-347E10.1		4.25053	4.3942	5.43978	0.0751502	0	0	7.21025	148.082	0.925879	99.4968	4.43334e-06	0.000207559
RNF212	ring finger protein 212	1.46965	0.561836	0.132497	0	0	0.0131355	7.15866	142.88	0.906912	33.9233	0.000279405	0.00158906
SNORD2	small nucleolar RNA, C/D box 2	10.1391	18.7107	12.4454	0	0	0.238105	7.05127	132.63	0.0322727	68.5812	1.96477e-05	0.000360466
PGBD5	piggyBac transposable element derived 5	0.174747	0.341186	0.33852	0.00519217	0	0	7.03371	131.026	0.752479	75.0774	1.37412e-05	0.00031283
SNORD14E	small nucleolar RNA, C/D box 14E	40.3459	15.3809	2.48137	0.345249	0	0	6.84581	115.025	-0.156743	25.3005	0.000767594	0.00309522
CPS1	carbamoyl-phosphate synthase 1	18.0861	28.8477	27.2835	0.331563	0.131461	0.220231	6.76546	108.795	7.02898	285.393	5.41671e-08	5.4406e-05
LSMEM1	leucine rich single-pass membrane protein 1	2.38153	1.85363	0.185994	0	0.0252237	0.0126769	6.74426	107.207	1.00254	32.9309	0.000310476	0.00169892
ERVH48-1	endogenous retrovirus group 48 member 1	0.444061	0.747533	1.53729	0.0206518	0	0	6.70207	104.118	0.439188	51.9532	5.75976e-05	0.000620781
TFF1	trefoil factor 1	1.44396	3.73706	9.02288	0	0	0.119268	6.68625	102.982	0.450669	37.1569	0.000200386	0.00128161
CTC-459M5.2		1.19897	0.448116	2.14299	0	0	0.0281564	6.6477	100.267	-0.324042	40.8119	0.00014226	0.00103512
USH1C	USH1 protein network component harmonin	0.984625	1.17968	9.90439	0.0359048	0.0399958	0.040202	6.62813	98.9162	3.28804	38.5015	0.000206667	0.0013084
HSPA1A	heat shock protein family A (Hsp70) member 1A	4331.97	4097.4	521.922	25.9778	43.1696	32.8188	6.45038	87.4496	11.8834	63.2398	3.36452e-05	0.000460591
CHRNA9	cholinergic receptor nicotinic alpha 9 subunit	4.36469	5.35456	9.60615	0.176003	0.0206376	0.020744	6.4059	84.7945	3.36281	82.6136	9.47095e-06	0.000275521
FGF18	fibroblast growth factor 18	1.96163	1.03682	0.121373	0	0.0329203	0	6.3595	82.111	0.154108	23.3501	0.00100227	0.00371787
ENO4	enolase 4	0.251461	0.454525	0.380922	0.00927502	0	0	6.33413	80.6793	-0.639824	50.9016	6.2257e-05	0.000651677
FAM9B	family with sequence similarity 9 member B	1.40724	3.26224	1.47947	0	0.038217	0.0384141	6.33138	80.5259	2.86051	63.8493	2.62052e-05	0.000410137
ADRA2B	adrenoceptor alpha 2B	1.0743	0.310265	0.429038	0	0	0.0194948	6.32407	80.1191	0.123111	41.8187	0.000130037	0.000980369
HSPA1B	heat shock protein family A (Hsp70) member 1B	5198.97	5114.31	559.198	34.2818	55.5378	45.749	6.32212	80.0107	12.1891	56.6522	5.08112e-05	0.000573944
RP11-343L5.2		1.2086	1.48098	0.493018	0.0369366	0	0	6.11212	69.172	-0.116794	41.5375	0.000133317	0.000997487
EID3	EP300 interacting inhibitor of differentiation 3	2.91745	3.11917	1.74583	0	0.0668505	0.0447968	6.05486	66.4807	1.00068	72.1275	1.61055e-05	0.000330996
EPS8L3	EPS8 like 3	4.84476	4.7565	25.6507	0.101281	0.263249	0.151204	6.04366	65.9664	4.34542	54.0341	6.05729e-05	0.00064064
TTC22	tetratricopeptide repeat domain 22	0.353418	0.0917648	0.373216	0.0096932	0	0	6.04202	65.8914	-0.164853	37.3486	0.000196684	0.00126489
PZP	PZP alpha-2-macroglobulin like	1.19399	1.5904	0.629039	0.0188509	0.0104994	0.0211071	6.03419	65.535	1.88285	122.141	1.91608e-06	0.000150667
KRT19	keratin 19	71.9353	76.94	260.55	5.08784	0.839638	0.337587	6.02764	65.238	7.31233	31.7732	0.000501347	0.00232557
SPP1	secreted phosphoprotein 1	0.921994	4.33727	3.80369	0	0.0563376	0.0849422	5.98746	63.4459	1.8683	43.2549	0.000115459	0.000914365
SEMA6D	semaphorin 6D	0.814368	1.27193	1.13383	0.0411539	0.00764051	0	5.96875	62.6286	2.24255	61.4587	3.01675e-05	0.00043493
ABCG2	ATP binding cassette subfamily G member 2 (Junior blood group)	5.37613	6.38453	8.86278	0.175544	0.0404578	0.121999	5.90678	59.9955	4.07863	161.224	6.05388e-07	0.000107469
RP11-690D19.3		0.300484	0.281267	0.271078	0	0	0.0128529	5.85386	57.8344	-0.319393	46.8962	8.48519e-05	0.000770292
RASGEF1A	RasGEF domain family member 1A	0.0813163	0.182986	1.0816	0	0	0.0216423	5.84069	57.309	0.508982	18.7081	0.00207425	0.00630488
ADCY4	adenylate cyclase 4	0.153041	0.129652	0.00747018	0	0	0.0040732	5.77255	54.6652	-1.1108	16.1906	0.00316402	0.00862515
VTN	vitronectin	1.58258	2.28939	1.82499	0.0725492	0.0269385	0	5.73874	53.3991	1.27106	68.5329	1.97023e-05	0.000360466
SLC16A6	solute carrier family 16 member 6	0.270231	1.43261	0.830994	0.0289054	0.0160994	0	5.71683	52.5941	0.870502	38.5902	0.000174633	0.00117867
TRIM31	tripartite motif containing 31	9.29771	2.37621	60.8415	0.938081	0.157207	0.278855	5.67719	51.1688	5.39824	19.1359	0.00281455	0.00792023
RP11-448G15.3		0.640937	0.391096	0.0515059	0	0	0.0187228	5.66392	50.7002	-0.486786	19.8696	0.00168748	0.00540904
BTBD16	BTB domain containing 16	4.50412	3.64066	10.7199	0.121971	0.081521	0.163883	5.6354	49.7077	2.93594	115.371	2.42226e-06	0.000161999
SNORA81	small nucleolar RNA, H/ACA box 81	2.88392	2.84802	1.62532	0	0.0904285	0.0454474	5.63079	49.5492	-0.0440958	53.0602	5.31468e-05	0.000592109
RP11-121L10.2		0.486153	0.569517	0	0.0173338	0	0	5.62178	49.2408	-0.564932	11.6476	0.00802893	0.0176795
FRMD3	FERM domain containing 3	0.558349	0.861709	1.83499	0.00904908	0.0151202	0.0405285	5.60856	48.7917	1.85565	69.7444	1.8389e-05	0.000351446
MSLNL	mesothelin like	0.791849	0.360694	1.70094	0.0249119	0	0.0278934	5.5847	47.9913	0.249815	40.8284	0.000142048	0.00103512
CGA	glycoprotein hormones, alpha polypeptide	0.120119	0.81568	1.66222	0.0256972	0.0286251	0	5.42223	42.88	0.0918689	22.8239	0.00108018	0.00392369
CYB5R2	cytochrome b5 reductase 2	0.143623	0.148289	0.0806203	0	0.00760584	0	5.41345	42.6199	-0.711987	33.0126	0.00030621	0.00168639
PKI55	long intergenic non-protein coding RNA 1963	0.67978	0.892905	0.191429	0.0372886	0	0	5.38166	41.6909	0.0248634	26.2466	0.00067826	0.0028466
PPP1R9A	protein phosphatase 1 regulatory subunit 9A	0.132858	0.252073	0.108083	0.0105268	0	0	5.36647	41.2543	0.00850624	32.2903	0.000331153	0.00176714
RP11-41O4.2		0.821912	0.84283	0.457049	0.0222572	0.0247933	0	5.35123	40.8207	0.0293594	52.0494	5.71932e-05	0.00061815
REEP1	receptor accessory protein 1	0.168283	0.188331	0.20162	0.0109094	0	0	5.34692	40.6989	-0.80191	37.5179	0.000193483	0.00125233
AP000648.5		2.64187	3.14009	0.989435	0.0651124	0.0435188	0.0583243	5.32558	40.1013	2.41115	95.1821	5.30663e-06	0.000223183
CLIC5	chloride intracellular channel 5	0.579381	0.159844	0.415276	0.0130471	0.00726685	0.00730432	5.27726	38.7804	0.859049	71.4405	1.67261e-05	0.000336306
MYO5C	myosin VC	0.439728	0.507593	0.857885	0.0292147	0.00325435	0.0130845	5.2418	37.8389	1.65003	75.7347	1.32738e-05	0.000310432
DCAF4L1	DDB1 and CUL4 associated factor 4 like 1	0.707153	0.746565	0.138911	0	0.0137007	0.0275427	5.22758	37.4679	0.459326	28.776	0.000495226	0.00230902
PDZK1	PDZ domain containing 1	4.24803	5.89111	7.01031	0.165664	0	0.291486	5.21178	37.0597	2.87186	45.4678	0.000101485	0.000854288
HSPA1L	heat shock protein family A (Hsp70) member 1 like	11.6794	10.6379	1.58709	0.103819	0.282696	0.258321	5.20555	36.9001	3.39932	41.1742	0.000162847	0.00112474
CDHR5	cadherin related family member 5	0.453358	0.514782	3.55534	0.0151542	0.0844046	0.016968	5.20551	36.899	1.58314	24.29	0.000966379	0.0036177
NPAS2	neuronal PAS domain protein 2	1.64071	1.34757	1.82122	0.0681321	0.0183195	0.0420891	5.19823	36.7132	3.3587	155.842	6.9761e-07	0.000111324
SLC7A2	solute carrier family 7 member 2	1.62772	2.69166	2.22981	0.0816718	0.0661655	0.0290967	5.19275	36.574	3.16245	146.731	8.96658e-07	0.000124146
PROS1	protein S	0.953945	1.03315	1.7552	0.0132518	0.0295235	0.0593515	5.15373	35.5981	1.5266	86.8043	7.69575e-06	0.000257215
MAFB	MAF bZIP transcription factor B	6.19375	4.17105	1.56294	0.138384	0.115614	0.0774735	5.14328	35.3412	2.8054	81.3371	9.9885e-06	0.000277049
LAMA4	laminin subunit alpha 4	0.203838	0.398143	0.426909	0.0278884	0	0	5.11164	34.5746	1.07142	27.3283	0.000593837	0.00259387
PALM3	paralemmin 3	0.920645	2.14197	2.0579	0.0926843	0	0.0518886	5.08813	34.0157	1.19583	43.8795	0.000108798	0.000883689
RHOU	ras homolog family member U	0.28866	0.261655	0.978636	0.0402738	0	0	5.07287	33.6578	0.253359	23.4498	0.000988299	0.00367893
TRIM31-AS1	TRIM31 antisense RNA 1	13.2429	3.63161	74.5865	0.962169	0.774078	0.957624	5.02207	32.4934	3.07429	23.7343	0.00106048	0.00387113
DACT2	dishevelled binding antagonist of beta catenin 2	0.708132	0.603691	2.11908	0.0833895	0	0.0155617	5.02167	32.4843	1.32712	29.9291	0.000434205	0.00210972
RP11-734K23.9		3.69441	1.81166	0.540333	0.11482	0.0639516	0	5.0205	32.458	1.69437	27.3771	0.000613788	0.00265426
KLHL32	kelch like family member 32	1.04445	0.340793	0.75985	0	0.0158535	0.0478057	5.00971	32.2162	0.647654	35.2601	0.000242069	0.0014454
LINC01484	long intergenic non-protein coding RNA 1484	2.37804	3.30908	1.76611	0.0208498	0.0696765	0.140072	5.00419	32.0931	1.88435	68.3514	1.99088e-05	0.000361648
LINC00473	long intergenic non-protein coding RNA 473	19.4354	27.4188	19.0797	0.476137	0.83667	0.74337	4.99235	31.8308	5.63984	217.397	1.72169e-07	7.18561e-05
CYP4F12	cytochrome P450 family 4 subfamily F member 12	0.538348	0.287081	1.12055	0.0329054	0	0.0245625	4.98425	31.6527	0.866361	36.8787	0.000205916	0.00130568
INMT-FAM188B	INMT-MINDY4 readthrough (NMD candidate)	0.914507	0.487997	0.481258	0	0	0.057046	4.96888	31.3172	-0.00856053	26.6591	0.00064333	0.00274482
PPM1L	protein phosphatase, Mg2+/Mn2+ dependent 1L	0.632595	0.651221	0.929564	0.0424384	0.0105053	0.0158392	4.96675	31.271	2.25273	103.504	3.77541e-06	0.000201483
EEF1A2	eukaryotic translation elongation factor 1 alpha 2	128.232	137.565	126.892	12.8444	0.0651843	0.0327602	4.96563	31.2467	7.07911	7.75685	0.0280081	0.0483496
RPS24P17	ribosomal protein S24 pseudogene 17	26.4623	17.9262	9.33134	0.485634	0.618249	0.621437	4.92922	30.4679	1.9882	99.9471	4.35275e-06	0.000207559
FAM188B	MINDY lysine 48 deubiquitinase 4	0.403899	0.213857	0.221793	0	0	0.0268744	4.90156	29.8895	0.16423	25.3983	0.00075772	0.00306954
F10	coagulation factor X	0.710335	0.67977	2.85195	0	0.111001	0.0278934	4.8631	29.1031	0.814538	23.837	0.000939911	0.00354551
RP11-159D12.2		1.28396	1.04037	2.13073	0.0605908	0.0562455	0.0339213	4.83824	28.606	2.16195	135.118	1.26263e-06	0.000138864
C4BPB	complement component 4 binding protein beta	0.383531	0.497527	0.327612	0.0182331	0	0.0204153	4.83227	28.4878	-0.445407	41.8973	0.000129138	0.000976872
PDZK1P1	PDZ domain containing 1 pseudogene 1	0.670639	0.992639	1.20524	0.0434758	0	0.0486792	4.81698	28.1875	-0.457745	40.585	0.000145207	0.00104953
AC026348.1		1.3656	1.9734	0.676796	0.0474601	0.0939872	0	4.80782	28.0091	1.98545	31.8525	0.000351175	0.00184263
LRRC3	leucine rich repeat containing 3	0.504857	0.089104	0.667409	0.0300012	0	0.0111973	4.80411	27.9371	0.397809	24.3223	0.000875688	0.00338565
C1QTNF1-AS1	C1QTNF1 antisense RNA 1	4.48733	6.32712	4.27323	0.0607581	0.067681	0.40818	4.79749	27.8092	1.37247	50.7501	6.29657e-05	0.000656983
MYBPC3	myosin binding protein C3	0.275634	0.0916387	0.527996	0.0137132	0.0152757	0	4.77183	27.3189	-0.480862	25.7771	0.000720896	0.00296989
PPARGC1A	PPARG coactivator 1 alpha	2.51132	2.66106	2.23973	0.0755927	0.132323	0.0604572	4.76742	27.2356	3.80404	176.787	4.11537e-07	9.84906e-05
SCARA5	scavenger receptor class A member 5	4.28076	2.71204	2.18084	0.0794034	0.176901	0.074089	4.76316	27.1553	2.81799	105.63	3.47513e-06	0.000193715
RTN4RL1	reticulon 4 receptor like 1	1.45312	0.919673	1.79539	0.145719	0	0	4.7581	27.0601	1.40067	21.4872	0.00139807	0.00471794
N4BP2L2-IT2	N4BPL2 intronic transcript 2	0.224419	0.380985	0.49294	0.024005	0	0.013439	4.75766	27.0519	-0.0195929	38.458	0.000176831	0.00118545
ZNF701	zinc finger protein 701	0.479484	0.441401	0.292022	0.0419631	0	0	4.74577	26.8299	0.465993	24.6273	0.000840081	0.00329652
ID2	inhibitor of DNA binding 2	11.9695	9.7831	10.4809	0.705373	0.266856	0.223527	4.73501	26.6305	3.61721	124.596	1.76518e-06	0.000146979
SNORA4	small nucleolar RNA, H/ACA box 4	2.54392	4.89568	2.23511	0.167453	0.0932665	0.0937474	4.70756	26.1287	0.315143	60.6319	3.17971e-05	0.000445583
CTD-2540F13.2		0.850839	0.537846	0.83909	0.0742941	0	0	4.6962	25.9237	-0.581032	26.7136	0.000638885	0.00273158
CFAP44	cilia and flagella associated protein 44	0.732028	1.02282	0.357314	0.0386674	0.0430733	0	4.67492	25.5441	2.18487	30.8127	0.000409529	0.00202531
FAM102B	family with sequence similarity 102 member B	2.79191	2.90684	1.49447	0.11293	0.0628988	0.105372	4.67198	25.4921	3.55489	142.31	1.01826e-06	0.000126521
LINC00602	long intergenic non-protein coding RNA 602	27.3821	34.5996	25.5055	0.781617	1.48806	1.12976	4.67136	25.4811	4.97369	195.003	2.72458e-07	8.86958e-05
NOSTRIN	nitric oxide synthase trafficking	0.41822	0.840778	1.48129	0.0782863	0.012458	0.0125223	4.66995	25.4563	1.34168	38.1305	0.000182425	0.00121231
WNT6	Wnt family member 6	2.60981	1.80407	2.40623	0.103392	0.115173	0.0385889	4.66689	25.4024	1.04299	98.124	4.69063e-06	0.000212924
MUC5B	mucin 5B, oligomeric mucus/gel-forming	0.631373	0.179257	0.27542	0.0410259	0	0	4.65891	25.2622	1.80946	16.6038	0.00317984	0.00865957
SNORD56	small nucleolar RNA, C/D box 56	14.355	15.781	18.9916	0.533567	0.858523	0.531046	4.64291	24.9836	2.09081	163.68	5.68305e-07	0.000107469
LINC00641	long intergenic non-protein coding RNA 641	2.03544	2.27619	0.695938	0.107834	0.0572002	0.0402466	4.5972	24.2045	2.34063	62.14	2.89011e-05	0.000428437
CREB3L3	cAMP responsive element binding protein 3 like 3	37.0447	18.5635	201.353	2.07111	2.00192	6.15943	4.59624	24.1883	6.85778	24.3349	0.000978405	0.00365013
CTD-2541J13.2		1.22857	1.43396	0.802277	0.0621553	0.0593463	0.0198841	4.57294	23.8009	1.04127	76.4552	1.27837e-05	0.000305505
SGPP2	sphingosine-1-phosphate phosphatase 2	1.04445	1.07773	0.379347	0.0615777	0.0195983	0.0196993	4.57284	23.7992	0.602881	46.7594	8.57882e-05	0.000775333
SLC23A1	solute carrier family 23 member 1	0.710935	0.642873	0.338656	0.0366483	0	0.030776	4.56214	23.6233	0.00869786	35.7339	0.000230732	0.00140083
AC159540.1		2.13639	1.09609	0.285439	0.061161	0.0185808	0.0684811	4.53823	23.235	1.71452	33.2802	0.000299076	0.00166146
ACAT2	acetyl-CoA acetyltransferase 2	3.05687	4.58449	4.83609	0.170657	0.16729	0.206369	4.50426	22.6943	3.23103	199.664	2.46632e-07	8.86958e-05
CYP1B1-AS1	CYP1B1 antisense RNA 1	0.928384	0.574952	0.222533	0.035466	0.0307277	0.00882462	4.47777	22.2814	1.2012	43.3005	0.000114304	0.000910241
ZNF100	zinc finger protein 100	0.518663	0.612957	0.309877	0.0621365	0	0	4.47027	22.1659	0.788183	19.0989	0.00191705	0.00594471
GJB2	gap junction protein beta 2	3.07473	1.92578	2.07329	0.31438	0	0	4.44046	21.7127	1.59936	16.8694	0.00303525	0.0083666
S100P	S100 calcium binding protein P	63.7012	62.6878	94.0651	2.01755	4.69917	3.23451	4.43604	21.6462	5.61013	143.41	9.86203e-07	0.000126521
ADGRE2	adhesion G protein-coupled receptor E2	1.21871	0.879471	0.356455	0.0510546	0.0227487	0.03811	4.43145	21.5774	1.90808	64.1522	2.55242e-05	0.000407312
LINC00163	long intergenic non-protein coding RNA 163	1.26037	1.53185	0.503348	0.0272354	0.091016	0.0304951	4.43011	21.5573	0.389972	39.7973	0.000156038	0.00109807
CYP1B1	cytochrome P450 family 1 subfamily B member 1	6.74704	8.87491	3.27663	0.751465	0.0815345	0.065564	4.42107	21.4228	4.32602	24.6355	0.000940274	0.00354551
RP11-499P20.2		0.696768	0.601809	0.9948	0.0558975	0	0.041725	4.41858	21.3858	-0.537776	34.8536	0.00025235	0.00148769
RP11-121C2.2		1.11224	1.02284	0.828637	0.0417442	0.077501	0.0155801	4.4159	21.3461	1.16435	68.333	1.99299e-05	0.000361648
RP11-53O19.3		1.1772	1.46736	2.19069	0.13991	0.0519506	0.0261092	4.4158	21.3446	1.11894	58.5133	3.64936e-05	0.000478889
KBTBD8	kelch repeat and BTB domain containing 8	0.231716	0.289854	0.0890696	0.0123928	0	0.013876	4.4127	21.2988	-0.813372	24.9336	0.000806104	0.00319867
RNA5-8S5	RNA, 5.8S ribosomal 5	21.5178	22.1101	64.8653	1.46251	1.92294	1.58386	4.4111	21.2752	4.51461	85.2579	8.27193e-06	0.000263347
C3orf35	APRG1 tumor suppressor candidate	0.48226	0.340463	0.529646	0.0573167	0	0	4.4025	21.1487	-0.353225	22.2855	0.00116776	0.00414145
SNORA63	small nucleolar RNA, H/ACA box 63	0.972593	1.93114	1.64674	0.108368	0.0482864	0.0485354	4.40194	21.1406	0.187158	57.3572	3.94164e-05	0.000498509
C11orf86	chromosome 11 open reading frame 86	20.3164	12.2532	47.1637	0.642797	1.43208	1.60555	4.3897	20.9619	4.02239	59.7938	3.3815e-05	0.000460592
CTD-2318O12.1		7.0011	3.86517	3.62572	0	0.542571	0.136342	4.36166	20.5585	0.356746	25.8974	0.000709663	0.00294298
CCNE2	cyclin E2	11.0814	12.6813	7.29804	1.16797	0.252776	0.119567	4.35031	20.3974	4.58548	35.0148	0.000288238	0.00162116
MEOX1	mesenchyme homeobox 1	2.62494	1.35229	11.6539	0.585406	0.0724564	0.0849683	4.34862	20.3734	2.85988	18.666	0.0022445	0.00668505
AC012307.2		20.8898	11.9456	19.1186	0	0.331877	2.16833	4.34089	20.2647	0.878427	23.9055	0.000927398	0.00351379
VIL1	villin 1	1.27265	0.9777	8.03347	0.32654	0.0850315	0.08547	4.33109	20.1274	3.60615	21.7813	0.00139367	0.00470548
IL33	interleukin 33	0.101206	0.361709	0.379763	0.0180425	0.0200983	0	4.32263	20.0097	-0.890946	21.794	0.00125546	0.00435623
SCUBE1	signal peptide, CUB domain and EGF like domain containing 1	0.183128	0.304355	0.218502	0.00241831	0.00538771	0.0270774	4.31951	19.9665	0.648615	34.4215	0.000263869	0.0015362
RP3-425C14.4		0.777425	0.72483	1.12604	0.0964145	0.02685	0	4.31728	19.9357	0.23203	30.4751	0.000405776	0.00201612
NRCAM	neuronal cell adhesion molecule	0.107156	0.542547	0.235369	0.0429823	0	0	4.3096	19.8299	0.42707	14.1513	0.004696	0.0116165
FYB	FYN binding protein 1	0.787076	0.846581	0.726107	0.105839	0	0.0107733	4.29902	19.685	1.36596	22.9843	0.00105967	0.00386946
FLJ16779	uncharacterized LOC100192386	5.79739	0.145492	0.702188	0.215159	0.0256794	0.0860395	4.29728	19.6613	3.11847	11.5362	0.0086932	0.0188993
FAM111B	FAM111 trypsin like peptidase B	9.65879	10.593	5.63152	1.07874	0.135397	0.136095	4.27753	19.3939	4.14041	30.2932	0.000473831	0.00223811
NKAIN4	sodium/potassium transporting ATPase interacting 4	1.80982	0.465521	0.429152	0	0.0122526	0.123158	4.27312	19.3347	0.400987	16.1248	0.00321144	0.00872374
ZDHHC23	zinc finger DHHC-type palmitoyltransferase 23	1.66041	1.63468	0.979319	0.0986702	0.0732752	0.0506365	4.24754	18.9949	2.43855	117.802	2.22343e-06	0.00015715
FAM105A	OTU deubiquitinase with linear linkage specificity like	1.23236	2.24635	3.32077	0.244912	0.0320961	0.0806541	4.22945	18.7582	2.29266	40.8138	0.000142236	0.00103512
CACNA2D1	calcium voltage-gated channel auxiliary subunit alpha2delta 1	0.264913	0.279323	0.140455	0.00651413	0	0.0291751	4.22792	18.7384	0.201116	24.4632	0.00085902	0.00335057
PDE4B	phosphodiesterase 4B	0.0952171	0.639018	0.209146	0.0271598	0.00756361	0.0152052	4.22651	18.72	0.601577	24.5286	0.000851408	0.00332734
SYTL4	synaptotagmin like 4	2.48202	2.34529	1.76048	0.20939	0.0352072	0.106166	4.22622	18.7162	3.1107	64.6805	2.47193e-05	0.000398409
PDE7B	phosphodiesterase 7B	0.101509	0.307825	0.2179	0.00987089	0.0109956	0.0110523	4.22165	18.657	-0.478552	36.6547	0.000210501	0.00132291
CSGALNACT1	chondroitin sulfate N-acetylgalactosaminyltransferase 1	1.55522	1.03319	2.27585	0.0401391	0.0894253	0.124842	4.2184	18.6151	2.48734	76.4339	1.27979e-05	0.000305505
AKAP5	A-kinase anchoring protein 5	0.328697	0.261058	0.0240663	0.0234394	0.00870338	0	4.16603	17.9515	-0.186279	13.9021	0.00492735	0.0120542
AC083843.1		0.754655	0.580198	0.221657	0.0328519	0.0209115	0.031529	4.15491	17.8136	0.831497	50.6054	6.36521e-05	0.000660113
CCDC121	coiled-coil domain containing 121	9.55024	9.02155	1.46205	0.722304	0.160921	0.254179	4.14926	17.744	3.34547	26.8037	0.000713472	0.00294975
CRIP1	cysteine rich protein 1	36.8968	35.6833	57.0003	7.21549	0.197323	0.14545	4.12525	17.4512	5.81356	8.93018	0.0210648	0.0382755
TIMM21	translocase of inner mitochondrial membrane 21	8.43391	8.56649	9.44196	0.439516	0.502149	0.555212	4.12457	17.4429	4.59795	322.081	3.23075e-08	4.35508e-05
C6orf25	megakaryocyte and platelet inhibitory receptor G6b	0.812688	0.745611	0.410364	0	0.0445215	0.0671266	4.10706	17.2325	0.118267	25.6648	0.000731581	0.00299646
DMXL2	Dmx like 2	3.99596	4.53326	1.86586	0.382582	0.125485	0.104713	4.10074	17.1572	4.67367	53.1064	5.49954e-05	0.000603208
PRKAR2B	protein kinase cAMP-dependent type II regulatory subunit beta	0.609954	0.605548	0.341921	0.027185	0.0454237	0.0152193	4.10064	17.156	0.323823	52.279	5.62416e-05	0.000610296
TTC28	tetratricopeptide repeat domain 28	0.594484	0.410979	0.421762	0.051057	0.025852	0.00519707	4.08316	16.9493	1.69005	46.3905	8.83764e-05	0.000787789
PPIP5K2	diphosphoinositol pentakisphosphate kinase 2	1.38209	1.85092	1.1864	0.112151	0.0908579	0.0589816	4.07351	16.8364	3.76479	142.457	1.01389e-06	0.000126521
PKIB	cAMP-dependent protein kinase inhibitor beta	0.959274	1.73327	2.21241	0.153913	0.0571502	0.0765932	4.066	16.7489	1.5976	65.7901	2.31276e-05	0.000388904
PSMD6-AS2	PSMD6 antisense RNA 2	0.469169	0.984792	0.306708	0.0477951	0.0532409	0	4.0616	16.698	-0.265791	21.8739	0.00124066	0.00432239
RP11-762H8.2		3.35539	2.63357	5.59265	0.380022	0.188143	0.0945567	4.05881	16.6657	0.555428	50.0874	6.61857e-05	0.000671217
A2MP1	alpha-2-macroglobulin pseudogene 1	0.518424	0.435138	0.433492	0.0378091	0	0.0423343	4.05789	16.6551	0.263369	31.0986	0.000378012	0.00192459
AC010492.2		1.91833	1.55986	0.267533	0	0.145127	0.0729378	4.04782	16.5392	-0.591657	15.178	0.00382759	0.00996669
RP11-348P10.2		1.20811	1.05434	1.01825	0.0901572	0.0669532	0.0336492	4.04217	16.4746	0.253814	65.5759	2.34249e-05	0.000390785
SEPT3	septin 3	1.21833	0.301128	0.966056	0.108149	0.0240943	0.0121093	4.04184	16.4709	1.26512	27.4577	0.000581788	0.0025594
FOSB	FosB proto-oncogene, AP-1 transcription factor subunit	38.4577	36.1159	10.4072	1.23663	1.28334	2.64501	4.03681	16.4135	6.39119	50.8519	7.57782e-05	0.000717603
ACTA1	actin alpha 1, skeletal muscle	1.358	0.940088	0.665098	0	0.0874646	0.0879156	4.02906	16.3256	-0.239157	25.0603	0.000792543	0.00316415
LTK	leukocyte receptor tyrosine kinase	0.377333	0.168573	0.941053	0.0840864	0	0	4.01803	16.2012	-0.051572	12.8347	0.00616044	0.0143064
CTD-2303H24.2		0.402464	0.263071	0.230784	0.0533359	0	0	3.99304	15.9231	0.355879	15.2023	0.00380981	0.00992833
KIAA0319	KIAA0319	0.772715	1.20767	1.13852	0.0245506	0.0957178	0.0733039	3.98911	15.8797	2.01104	61.2649	3.054e-05	0.00043705
MYLK3	myosin light chain kinase 3	0.0921999	0.322657	0.313271	0.0339013	0.00686618	0.00345079	3.98799	15.8674	0.367928	23.6303	0.000963601	0.00361098
MAP3K5	mitogen-activated protein kinase kinase kinase 5	6.92218	4.45613	8.01144	0.630862	0.258906	0.322203	3.98141	15.7951	4.1728	114.064	2.53817e-06	0.000161999
SHISA4	shisa family member 4	0.73852	0.636467	0.414171	0.0672306	0.0374455	0	3.97893	15.768	-0.698238	25.4244	0.000755107	0.00306443
RP11-120K24.5		4.52322	5.48938	5.75692	0.18087	0.604436	0.202518	3.95967	15.5589	0.907049	53.9282	4.99497e-05	0.00056935
HELLPAR	HELLP associated long non-coding RNA	0.0343924	0.0465527	0.010435	0.00429431	0.000956722	0.000641103	3.9547	15.5054	1.77461	25.2167	0.000779373	0.00312691
CA9	carbonic anhydrase 9	5.32276	0.274001	1.89446	0.421741	0	0.0393515	3.94916	15.446	1.15907	9.80544	0.0130837	0.0260096
USP32P3	ubiquitin specific peptidase 32 pseudogene 3	1.15784	0.605579	0.66682	0	0.117771	0.0338224	3.94434	15.3944	-0.153155	21.1791	0.00137687	0.00466386
RP11-22B23.2		2.94952	2.39835	1.74821	0	0.223139	0.22429	3.93966	15.3446	-0.31855	24.6887	0.000833135	0.00327711
HNF4A	hepatocyte nuclear factor 4 alpha	1.35844	1.64518	2.00708	0.152531	0.0715413	0.103371	3.92084	15.1458	2.7097	126.139	1.67782e-06	0.000146979
KALRN	kalirin RhoGEF kinase	0.0694563	0.0800763	0.0861236	0.00479317	0.00266965	0.00805026	3.87822	14.7048	0.120781	54.2106	4.89611e-05	0.000564405
DNAJA1	DnaJ heat shock protein family (Hsp40) member A1	263.961	499.833	206.281	18.5214	23.0386	24.9508	3.87333	14.6551	8.90076	99.5807	4.4182e-06	0.000207559
LINC00689	long intergenic non-protein coding RNA 689	0.464344	0.392585	0.391525	0.0192266	0.0356955	0.0287036	3.86548	14.5756	1.06508	90.2844	6.56937e-06	0.000240291
PTPRB	protein tyrosine phosphatase receptor type B	0.233941	0.26072	0.0994558	0.0242163	0.00449593	0.0112978	3.86409	14.5615	0.685799	35.3681	0.000239427	0.0014333
PAIP1P1	poly(A) binding protein interacting protein 1 pseudogene 1	1.34553	1.11393	0.651209	0.146365	0	0.0546275	3.85998	14.5201	-0.455277	22.4386	0.001142	0.00408151
HSPH1	heat shock protein family H (Hsp110) member 1	61.1652	128.303	30.192	7.88394	4.00149	3.6579	3.85736	14.4938	8.38823	44.897	0.000119328	0.000934694
ERCC6L	ERCC excision repair 6 like, spindle assembly checkpoint helicase	5.09853	4.32148	3.45222	0.443824	0.209743	0.240942	3.83834	14.304	3.32837	122.774	1.87566e-06	0.000149736
SLC7A7	solute carrier family 7 member 7	0.272695	0.45864	0.663574	0	0.0127421	0.0832508	3.8345	14.2659	0.415868	16.5382	0.00296951	0.00822858
RP11-707P17.1		3.47839	4.08556	2.20602	0.314423	0.0583748	0.293379	3.83	14.2214	0.0579858	37.7177	0.000189789	0.00123808
CSPG5	chondroitin sulfate proteoglycan 5	0.936291	1.54214	0.772943	0.107544	0.0598991	0.0602079	3.82636	14.1856	1.386	67.8927	2.04426e-05	0.00036318
DNAJA1P3	DnaJ heat shock protein family (Hsp40) member A1 pseudogene 3	0.85017	1.61506	0.479471	0.196624	0	0	3.81016	14.0273	-0.530277	12.6439	0.00641948	0.0147731
NAIP	NLR family apoptosis inhibitory protein	0.467203	0.26799	0.247053	0.0370182	0.0137454	0.0172703	3.80687	13.9953	0.784252	55.2866	4.54066e-05	0.000538538
HSPD1P11	heat shock protein family D (Hsp60) member 1 pseudogene 11	0.741493	0.825753	0.0354065	0.0689687	0	0.0386116	3.80461	13.9734	-0.854935	10.1203	0.0115329	0.0235889
ZSCAN31	zinc finger and SCAN domain containing 31	4.93137	4.64189	3.98747	0.355209	0.21103	0.397722	3.80448	13.9721	3.58905	159.164	6.38806e-07	0.000107469
RP11-546D6.3		1.45766	1.20939	1.71523	0.083528	0.0620302	0.155875	3.80159	13.9442	-0.178441	48.8252	7.28973e-05	0.00070502
TRAPPC3L	trafficking protein particle complex subunit 3L	0.258729	0.640174	0.39344	0.0638654	0	0.0238364	3.80109	13.9393	-0.517052	19.9156	0.00167518	0.00538233
C4orf19	chromosome 4 open reading frame 19	0.604169	0.377582	0.380716	0	0	0.0948981	3.79965	13.9254	-0.441624	13.6772	0.00515978	0.0124849
FAM46C	terminal nucleotidyltransferase 5C	0.658331	0.693358	0.382466	0.0204112	0.0227369	0.0799893	3.79886	13.9178	0.887423	39.5807	0.000159189	0.00110897
GOLGA8B	golgin A8 family member B	15.3022	13.7812	10.6067	1.59548	0.56259	0.741136	3.7815	13.7513	5.76414	95.1686	5.30968e-06	0.000223183
KCNAB3	potassium voltage-gated channel subfamily A regulatory beta subunit 3	0.682885	0.406772	0.177628	0.0128149	0.0285501	0.0502204	3.75277	13.4802	0.142086	27.9259	0.000549061	0.00246608
AC112229.1		0.596037	0.877155	0.115518	0.0937577	0	0.0209958	3.7446	13.404	-0.0575766	12.8117	0.00619095	0.0143547
RP6-74O6.2		0.326881	0.470932	0.517628	0.0487883	0	0.045523	3.74406	13.3991	-0.136175	24.3123	0.000876887	0.00338787
MYO15B	myosin XVB	1.59955	0.645442	5.1875	0.229968	0.174196	0.133895	3.74206	13.3805	4.0521	29.3358	0.000528072	0.00240521
FOS	Fos proto-oncogene, AP-1 transcription factor subunit	66.5291	45.0194	53.7481	2.80955	4.98728	4.35339	3.73383	13.3044	6.5706	167.033	5.22067e-07	0.000107469
KYNU	kynureninase	7.32957	13.1351	6.03304	0.52523	0.949122	0.520881	3.72926	13.2623	6.40299	78.3423	1.16016e-05	0.000291234
AMY2B	amylase alpha 2B	0.179459	0.191979	0.265471	0.0156701	0.00872778	0.021932	3.72406	13.2146	-0.130192	48.007	7.76971e-05	0.000725575
TSHZ2	teashirt zinc finger homeobox 2	0.880998	0.267586	0.672983	0.13529	0	0	3.71927	13.1708	2.03268	8.91554	0.0164241	0.031249
SLC39A10	solute carrier family 39 member 10	9.70169	13.2448	9.70533	1.26006	0.652191	0.60805	3.70341	13.0268	5.34727	122.908	1.86727e-06	0.000149736
PLPP3	phospholipid phosphatase 3	1.22488	1.83641	0.80942	0.188757	0.024737	0.0870258	3.6919	12.9233	1.91239	34.0253	0.000275007	0.00157339
SEC31B	SEC31 homolog B, COPII coat complex component	0.452761	0.279988	0.971721	0.0369692	0.0494178	0.0413939	3.68655	12.8755	1.2946	49.3127	7.021e-05	0.000691187
AGR2	anterior gradient 2, protein disulphide isomerase family member	1.46578	0.930559	4.68115	0.53638	0	0	3.6836	12.8491	1.8472	8.05104	0.0207521	0.0378128
RP11-159D12.8		0.382619	0.343277	0.108945	0.0404217	0	0.0226298	3.67539	12.7762	-0.0938995	17.6229	0.00245012	0.0071445
C6orf163	chromosome 6 open reading frame 163	0.922752	0.600651	0.605962	0.0814041	0.0680095	0.0113934	3.66798	12.7108	0.216998	35.7882	0.000229472	0.00139631
KIAA0232	KIAA0232	5.70397	6.85685	4.43864	0.597351	0.311552	0.43301	3.6675	12.7066	4.70636	138.205	1.14977e-06	0.000135755
FAHD2P1	fumarylacetoacetate hydrolase domain containing 2 pseudogene 1	1.22713	1.84481	0.96265	0.0312526	0.0696271	0.209958	3.6655	12.6889	-0.422637	25.8873	0.000710598	0.00294448
PDE3B	phosphodiesterase 3B	0.431202	0.647715	0.324293	0.0150403	0.0390927	0.0561347	3.6614	12.6529	1.60371	45.5515	9.46303e-05	0.000822809
SNAP25	synaptosome associated protein 25	1.18502	2.98902	2.98886	0.0349671	0.233708	0.293641	3.65521	12.5987	2.13856	27.6975	0.000567233	0.00251302
CCDC144CP	coiled-coil domain containing 144C, pseudogene	0.181891	0.172551	0.0517905	0.00720593	0.016054	0.00806838	3.64201	12.484	-0.596767	23.9669	0.000919553	0.00349628
ZNF284	zinc finger protein 284	0.163943	0.27043	0.290853	0.0539575	0	0	3.6344	12.4183	-0.672772	13.162	0.00574544	0.0135788
GOLGA6L4	golgin A6 family like 4	1.77775	1.41193	1.85307	0.217737	0.113188	0.0704304	3.63026	12.3828	2.46604	79.5413	1.09199e-05	0.000284824
USP32P2	ubiquitin specific peptidase 32 pseudogene 2	0.447175	0.350082	0.266604	0.0728871	0	0.0102013	3.62792	12.3626	0.37132	16.6269	0.00292222	0.00812798
AL928654.7		63.3076	61.7244	98.6532	13.4017	2.34494	2.56707	3.62121	12.3053	5.8142	30.7861	0.000448595	0.00215583
PLGLB2	plasminogen like B2	1.43627	0.913541	1.28331	0.169255	0.0580123	0.0583114	3.62039	12.2983	0.61059	48.9965	7.19387e-05	0.000699674
LILRA6	leukocyte immunoglobulin like receptor A6	0.676291	1.01012	0.199543	0.0431879	0.060136	0.0483568	3.61256	12.2318	-0.00640987	25.0401	0.000794689	0.00316805
CEP162	centrosomal protein 162	4.28519	5.14688	3.32464	0.63796	0.268733	0.144063	3.60834	12.1961	3.66501	52.3794	5.58317e-05	0.000607627
TUBB1	tubulin beta 1 class VI	0.321752	0.289822	0.0775683	0.0251826	0.00935066	0.0187978	3.60311	12.1519	-1.00357	19.7809	0.00171148	0.00545682
RP11-521I2.3		1.009	0.944472	0.158306	0.0513943	0	0.115091	3.59714	12.1017	-0.999886	12.3492	0.00684645	0.0155533
SPON2	spondin 2	0.369575	0.217425	1.02224	0.0683263	0.0163096	0.0437166	3.59185	12.0574	0.829191	26.1649	0.000685451	0.00286703
DNTTIP2	deoxynucleotidyltransferase terminal interacting protein 2	45.7813	56.4838	39.6163	6.16664	3.47811	2.28117	3.58235	11.9783	7.59353	95.9206	5.1431e-06	0.00022083
RP11-157L3.11		3.83432	3.30782	0.290419	0.353568	0	0.237531	3.58226	11.9776	-0.682762	10.7132	0.00997528	0.0210621
DNALI1	dynein axonemal light intermediate chain 1	0.369415	0.293397	0.121714	0.0329288	0.0220085	0.00737398	3.58221	11.9771	-0.523963	25.088	0.000789621	0.0031548
OVGP1	oviductal glycoprotein 1	0.951202	0.687558	0.539939	0	0	0.179205	3.58005	11.9592	0.100827	10.8587	0.00965133	0.0204977
ENOX1	ecto-NOX disulfide-thiol exchanger 1	0.920111	1.74964	1.38946	0.113561	0.137042	0.0847687	3.57982	11.9573	1.22885	67.2947	2.11655e-05	0.000368067
TMPRSS3	transmembrane serine protease 3	1.19726	0.594788	2.42751	0.264427	0.0115512	0.0696646	3.57758	11.9388	2.09953	17.2232	0.00285508	0.00800691
NR4A1	nuclear receptor subfamily 4 group A member 1	18.7966	13.9967	22.0148	0.273549	2.15991	2.0134	3.57521	11.9192	6.15944	28.5688	0.000577164	0.00254456
CCER2	coiled-coil glutamate rich protein 2	1.06419	0.494751	1.08323	0.0832909	0.0618541	0.0621731	3.5738	11.9075	-0.825324	32.4434	0.000325663	0.00174644
SLC13A4	solute carrier family 13 member 4	0.410758	0.191662	0.146614	0.0366141	0	0.0245977	3.56105	11.8027	0.193833	18.2308	0.00220789	0.00659454
SPANXB1	SPANX family member B1	3.21735	7.52649	3.14801	0.125144	0.139403	0.910789	3.5607	11.7998	0.323579	19.5759	0.00176861	0.00559092
BX004987.1		1.06699	0.68671	0.363673	0	0.0292266	0.146886	3.55906	11.7865	-0.118985	14.2692	0.00457495	0.0113881
ALDH5A1	aldehyde dehydrogenase 5 family member A1	0.526359	0.579742	0.670789	0.148723	0	0	3.54504	11.6725	0.870862	10.096	0.0121802	0.024616
OGDHL	oxoglutarate dehydrogenase L	0.388234	0.274084	0.684316	0.0205075	0.0342661	0.0574047	3.53776	11.6137	0.528425	39.5207	0.000160076	0.00111301
NME9	NME/NM23 family member 9	0.49175	0.655788	0.411097	0.0785077	0.0174906	0.0351616	3.53304	11.5758	0.162298	36.3473	0.000217003	0.00134764
FASTKD1	FAST kinase domains 1	2.17583	1.99734	1.86838	0.14505	0.264398	0.103352	3.53195	11.5671	2.29756	78.2942	1.163e-05	0.000291234
DDX3X	DEAD-box helicase 3 X-linked	33.8054	43.9014	18.7306	2.6756	3.24775	2.41433	3.53182	11.566	7.29641	99.5408	4.42538e-06	0.000207559
FAM13A-AS1	FAM13A antisense RNA 1	0.504905	0.405838	0.547836	0.071576	0.00724832	0.0437141	3.52585	11.5182	0.317867	32.5653	0.000321371	0.00173437
GEN1	GEN1 Holliday junction 5' flap endonuclease	1.06011	1.06673	0.777031	0.163765	0.0552801	0.0333391	3.522	11.4876	2.65042	44.1014	0.000106775	0.000877438
ATP8A1	ATPase phospholipid transporting 8A1	0.195983	0.105067	0.156049	0.0262043	0.005838	0.00586811	3.52152	11.4837	-0.0240256	30.1877	0.000419417	0.00205566
NKTR	natural killer cell triggering receptor	11.2058	12.2689	6.70638	1.76692	0.433203	0.484661	3.51607	11.4404	6.57423	39.5418	0.000188057	0.00122981
BCLAF1P1	BCL2 associated transcription factor 1 pseudogene 1	0.657967	0.748227	0.394155	0.127963	0	0.0238797	3.51433	11.4267	-0.0566545	16.091	0.00322265	0.00874396
ZC3H12B	zinc finger CCCH-type containing 12B	0.206754	0.179516	0.042335	0.0112452	0.016702	0.00839404	3.50657	11.3653	-0.568437	20.4301	0.00154496	0.00507924
LINC00342	long intergenic non-protein coding RNA 342	7.84911	6.15487	3.775	0.638935	0.449517	0.476937	3.4949	11.2738	3.08584	99.8736	4.36578e-06	0.000207559
ONECUT2	one cut homeobox 2	0.530655	0.50736	0.226437	0.0433847	0.024164	0.0445292	3.48852	11.2241	1.92578	58.7365	3.59605e-05	0.000476727
RP11-473O4.5		1.43609	1.60393	0.460015	0.192014	0	0.107498	3.48189	11.1726	-0.627251	15.3076	0.00373372	0.00978961
TAS2R4	taste 2 receptor member 4	0.484558	0.57727	0.17739	0.0246814	0.0549872	0.0276354	3.47858	11.147	-0.736438	22.5782	0.00111911	0.00402406
GOLGA6L5P	golgin A6 family like 5, pseudogene	5.50253	4.05727	4.78355	0.602127	0.293446	0.379233	3.47772	11.1403	3.34133	127.308	1.61517e-06	0.000146979
TNFRSF11A	TNF receptor superfamily member 11a	0.213551	0.250776	0.0837623	0.0261058	0.00727008	0.0146151	3.47699	11.1347	-0.0556921	27.3019	0.000593203	0.0025921
AC107982.4		1.26624	0.829682	0.139066	0.0902959	0.0502922	0.0505515	3.47581	11.1256	-0.75352	15.2244	0.00379368	0.00989737
HSP90AA1	heat shock protein 90 alpha family class A member 1	1958.01	2386.42	1892.77	380.331	108.995	80.8188	3.47557	11.1237	12.5388	40.2454	0.000176638	0.00118545
SLC18A2	solute carrier family 18 member A2	0.705002	0.713116	1.00071	0.0142284	0.0950979	0.103554	3.47168	11.0938	0.900087	31.8078	0.000349213	0.00183537
ANKRD36	ankyrin repeat domain 36	3.64006	2.85609	3.79831	0.394519	0.290727	0.234461	3.46699	11.0578	4.16912	178.702	3.93337e-07	9.84906e-05
CEP152	centrosomal protein 152	16.0352	16.0061	13.874	1.99761	1.2807	0.876977	3.46461	11.0395	6.08876	129.478	1.50625e-06	0.000143376
ZNF736	zinc finger protein 736	0.204109	0.25011	0.0832612	0.00623789	0.0208459	0.0209534	3.46111	11.0128	-0.0173351	25.8837	0.000710929	0.00294448
GS1-358P8.4		0.310316	0.363087	0.651184	0.0829825	0.0132054	0.0199102	3.45959	11.0012	0.315174	26.1849	0.000683682	0.00286164
VTRNA1-2	vault RNA 1-2	63.81	68.6741	61.6161	5.93518	9.18256	2.21518	3.45933	10.9992	1.67766	51.0306	6.1661e-05	0.000647482
PTPRR	protein tyrosine phosphatase receptor type R	2.44367	3.67398	2.32633	0.205457	0.228867	0.332291	3.45714	10.9825	3.0003	96.3972	5.04084e-06	0.00022029
RP11-104N10.2		0.678163	1.07923	0.661425	0.0866148	0.0482419	0.0848586	3.45269	10.9487	1.29835	65.5706	2.34322e-05	0.000390785
TARID	TCF21 antisense RNA inducing promoter demethylation	0.275678	0.270223	0.180127	0.011198	0.0207898	0.0334352	3.44229	10.8701	0.141226	39.4878	0.000160563	0.00111449
TOPBP1	DNA topoisomerase II binding protein 1	15.9937	18.211	13.9994	2.59904	0.893139	0.983484	3.44214	10.8689	5.83874	70.8344	1.72983e-05	0.00034421
PBK	PDZ binding kinase	11.8738	13.7229	12.2055	1.43681	0.996551	1.03204	3.44127	10.8624	3.90124	187.054	3.24636e-07	9.60744e-05
SRGN	serglycin	1.07942	5.30453	3.45765	0.0481085	0.26795	0.59253	3.4379	10.8371	1.18418	16.6236	0.00293225	0.00814791
KB-1460A1.5		0.36904	0.370231	0.277311	0.020776	0.0231433	0.0465253	3.43336	10.803	-0.772444	31.986	0.000342405	0.00181187
NXT2	nuclear transport factor 2 like export factor 2	1.52219	1.92011	0.826045	0.287332	0.0640142	0.0428962	3.43112	10.7862	1.29656	25.0842	0.000790014	0.0031556
GOLGA8A	golgin A8 family member A	30.4958	29.0044	23.0111	3.89108	1.67082	2.11755	3.43076	10.7835	6.66214	113.767	2.56543e-06	0.000161999
ZFPM2-AS1	ZFPM2 antisense RNA 1	5.91351	6.64618	5.14663	0.304999	0.59087	0.727549	3.43042	10.781	2.84859	81.0793	1.0116e-05	0.000278049
DDX1	DEAD-box helicase 1	97.1363	123.831	87.1463	15.4808	6.49875	6.97803	3.42606	10.7485	7.75336	91.3965	6.2528e-06	0.000233433
NCAPG	non-SMC condensin I complex subunit G	16.3519	18.0127	16.5442	2.83264	1.11601	0.827972	3.42228	10.7203	5.51138	64.8871	2.44129e-05	0.000395786
CCDC150P1	coiled-coil domain containing 150 pseudogene 1	0.718394	1.9773	0.21765	0.211981	0.0295168	0.029669	3.42223	10.72	0.32994	11.916	0.0075397	0.0167747
RP11-407N17.4		49.1763	56.3036	43.2635	7.64108	3.08395	3.22385	3.41882	10.6947	3.85117	81.6222	9.84979e-06	0.000277049
RP11-566E18.1		0.790902	0.6333	0.199354	0.0832122	0.0617957	0	3.41721	10.6828	-0.533527	14.626	0.00426182	0.0108071
RP11-485O10.3		24.576	17.2749	10.9159	2.33022	1.91975	0.652277	3.41546	10.6698	3.54168	48.4136	7.52651e-05	0.00071559
PPFIBP2	PPFIA binding protein 2	2.63597	3.98317	4.77483	0.830005	0.0747819	0.177669	3.41453	10.6629	4.32013	21.008	0.00156089	0.00512024
ZEB2	zinc finger E-box binding homeobox 2	1.77871	2.23209	0.526183	0.153496	0.121344	0.153849	3.41383	10.6578	4.31409	44.246	0.00010614	0.0008739
WDR35	WD repeat domain 35	2.19174	2.94894	1.5573	0.367014	0.100122	0.167731	3.41234	10.6467	3.27579	49.818	6.75524e-05	0.000678508
NPM1P9	nucleophosmin 1 pseudogene 9	7.99652	4.49218	5.56923	0.730177	0.54225	0.389318	3.4088	10.6206	1.49417	76.2687	1.29084e-05	0.000306283
ANXA10	annexin A10	9.46303	7.32334	6.21908	0.615427	0.793795	0.725353	3.40863	10.6194	2.93184	132.404	1.37328e-06	0.000142299
SNORD57	small nucleolar RNA, C/D box 57	133.366	147.08	151.073	13.8579	13.1668	13.2347	3.40519	10.5941	2.51425	158.068	6.57499e-07	0.000107469
RP11-69E11.4		0.780276	0.534234	1.15244	0.182274	0.0213729	0.0214831	3.40128	10.5654	0.508905	20.1698	0.00160922	0.00522886
RP11-142E9.1		1.01787	1.34658	0.662933	0.151921	0.0705132	0.0637891	3.39633	10.5292	1.39895	49.9238	6.70115e-05	0.000675385
GPD1	glycerol-3-phosphate dehydrogenase 1	0.302468	0.409477	0.166094	0	0.0327636	0.0493989	3.39342	10.508	-0.503655	15.3268	0.00372003	0.0097647
KB-1639H6.2		5.5003	5.21057	2.25618	0.496191	0.236883	0.47621	3.39036	10.4857	0.0643031	34.1667	0.000270968	0.0015596
AC013268.3		0.578454	0.492236	0.103721	0.0505097	0.0281324	0.0282775	3.38961	10.4803	-0.828305	17.2886	0.00259733	0.00746938
INTS8	integrator complex subunit 8	4.59695	5.13577	4.63494	0.671537	0.349091	0.350891	3.3883	10.4708	4.36884	127.269	1.61721e-06	0.000146979
HSP90AA4P	heat shock protein 90 alpha family class A member 4, pseudogene	0.554123	0.748163	0.432761	0.158058	0	0	3.38571	10.452	-0.380663	10.6347	0.0101657	0.0213645
MYPN	myopalladin	7.24352	6.8517	5.9323	0.465548	0.601939	0.828443	3.38372	10.4376	4.69002	142.547	1.01123e-06	0.000126521
MUC6	mucin 6, oligomeric mucus/gel-forming	0.416672	0.279222	0.243107	0.0139279	0.0543022	0.0194936	3.37944	10.4067	0.589341	33.2166	0.000299587	0.00166225
BIRC7	baculoviral IAP repeat containing 7	9.67785	3.53628	5.11185	0.676352	0.292995	0.757301	3.37833	10.3987	2.38292	49.6015	6.86754e-05	0.00068327
SNAI1	snail family transcriptional repressor 1	13.5223	12.8528	8.52459	0.243681	1.74501	1.30576	3.37726	10.391	3.43509	30.5027	0.000406425	0.00201797
DLX3	distal-less homeobox 3	2.86984	1.32423	2.45265	0.216178	0.144486	0.266256	3.37102	10.3462	1.72989	69.2751	1.88846e-05	0.000354947
QPRT	quinolinate phosphoribosyltransferase	0.790966	1.79486	7.48724	0.128923	0.466742	0.351862	3.3596	10.2645	2.73365	15.7625	0.00369793	0.0097208
ATR	ATR serine/threonine kinase	2.82124	3.81877	2.06403	0.462644	0.235443	0.157771	3.35841	10.2561	4.32723	60.9969	3.10646e-05	0.000441605
HSP90AA2P	heat shock protein 90 alpha family class A member 2, pseudogene	46.0752	49.4434	39.0769	8.08489	3.007	2.16962	3.35577	10.2374	5.75738	54.5324	4.8206e-05	0.000558469
USP16	ubiquitin specific peptidase 16	13.1298	20.4235	16.6689	2.5924	1.49269	0.854066	3.35512	10.2327	5.71511	70.3039	1.78189e-05	0.000348049
MSH2	mutS homolog 2	12.1506	13.2906	9.42585	2.01142	0.904861	0.51973	3.35203	10.2109	4.86391	54.761	4.71019e-05	0.000549984
MBTD1	mbt domain containing 1	3.68419	2.7324	1.5691	0.342324	0.231521	0.205337	3.34859	10.1865	3.40062	77.7618	1.19503e-05	0.000296066
ALDH1L2	aldehyde dehydrogenase 1 family member L2	0.0870755	0.20363	0.244391	0.0275972	0.0153708	0.00772504	3.3484	10.1852	-0.16477	26.3329	0.000670766	0.00282558
HOTAIR_3		50.6279	40.4344	41.3136	8.16852	0.674019	4.06497	3.33921	10.1205	1.26375	28.1544	0.000533912	0.00242616
MSS51	MSS51 mitochondrial translational activator	0.464236	0.350721	0.534722	0.072669	0.026983	0.0271221	3.3328	10.0757	-0.603563	31.5433	0.000359625	0.00186481
NPM1P6	nucleophosmin 1 pseudogene 6	6.64619	5.74136	7.95651	1.01077	0.525441	0.4527	3.33045	10.0593	1.71546	75.7237	1.32815e-05	0.000310432
HHIPL2	HHIP like 2	1.05103	0.526688	0.430573	0.133838	0.059635	0	3.3252	10.0227	0.342062	15.2656	0.0037638	0.00984333
ROCK2	Rho associated coiled-coil containing protein kinase 2	13.5675	15.6898	8.55666	1.88602	1.16968	0.741704	3.32497	10.0211	6.1427	74.5076	1.41628e-05	0.000315359
EGR2	early growth response 2	7.86095	3.74777	2.82605	0.365932	0.42535	0.6235	3.32415	10.0154	3.28273	57.4809	3.90905e-05	0.000496315
SESTD1	SEC14 and spectrin domain containing 1	2.95891	3.0153	4.42314	0.532673	0.161304	0.341642	3.32304	10.0077	4.4273	68.8578	1.9339e-05	0.000359339
TCTE3	dynein light chain Tctex-type 2	1.81787	2.19058	0.413067	0.268206	0.0746913	0.100102	3.31938	9.98233	1.14491	20.9464	0.00142657	0.00478967
KIAA1462	junctional cadherin 5 associated	3.52347	3.02628	1.73534	0.413283	0.206137	0.210653	3.31924	9.98138	3.85866	73.9822	1.45657e-05	0.000320387
BRSK2	BR serine/threonine kinase 2	0.476927	0.558709	0.763859	0.14029	0.0189424	0.0190401	3.31425	9.94691	1.21763	22.1539	0.00119048	0.00418972
AC016738.4		0.661279	0.347009	0.890528	0.11789	0.0469009	0.0188571	3.31079	9.92311	0.33508	26.1321	0.000688366	0.00287591
ZGRF1	zinc finger GRF-type containing 1	1.03074	1.07356	1.51929	0.264351	0.0574578	0.0433156	3.30504	9.88359	2.60133	29.1061	0.000476083	0.00224484
SLF1	SMC5-SMC6 complex localization factor 1	8.16375	6.99634	5.96329	1.40502	0.318482	0.429881	3.30467	9.88111	4.79694	42.3758	0.000124579	0.000957399
TTC37	tetratricopeptide repeat domain 37	12.1953	13.5108	8.49714	2.04176	0.91299	0.540061	3.30406	9.87693	5.67124	51.4918	5.99988e-05	0.000635807
ROR2	receptor tyrosine kinase like orphan receptor 2	0.297081	0.0786494	0.378061	0.0605283	0	0.0112955	3.30368	9.87429	-0.224143	11.6101	0.00808204	0.017782
KLHL15	kelch like family member 15	1.51349	3.05375	0.614918	0.219909	0.104241	0.209557	3.30249	9.86614	2.61822	29.0661	0.000478352	0.00225228
RP1-179N16.6		0.787614	0.178726	0.823813	0.0802356	0	0.0898386	3.29988	9.84833	-0.889766	13.112	0.0058066	0.0136878
RP11-268J15.5		1.07472	0.391218	1.14753	0.127731	0.124499	0	3.29802	9.83562	-0.0969328	15.5996	0.00353232	0.00939011
HMMR	hyaluronan mediated motility receptor	13.4806	16.226	23.2795	2.81831	1.37038	1.21049	3.29101	9.78797	5.2522	82.6326	9.37668e-06	0.000274011
SNORD26	small nucleolar RNA, C/D box 26	19.7534	34.4276	17.6768	1.95641	5.23039	0	3.29087	9.78703	0.0808804	14.4117	0.00444662	0.0111568
HSPA8P5	heat shock protein family A (Hsp70) member 8 pseudogene 5	1.65752	1.46914	1.01941	0.198572	0.126399	0.095288	3.2754	9.68264	0.712657	52.404	5.5732e-05	0.000607627
OXTR	oxytocin receptor	0.425447	0.492367	0.8811	0.130023	0.0289676	0.0218377	3.27517	9.68109	0.624731	24.0714	0.000906376	0.00346479
ENTPD1	ectonucleoside triphosphate diphosphohydrolase 1	0.275336	0.468594	0.557261	0.0715247	0.0281203	0.0329762	3.26985	9.64544	0.7881	41.5604	0.000133046	0.00099613
RGPD2	RANBP2 like and GRIP domain containing 2	5.30574	5.3391	6.76233	0.898309	0.448896	0.451211	3.26852	9.63655	4.47908	112.512	2.68472e-06	0.000166833
PAXBP1	PAX3 and PAX7 binding protein 1	11.0357	11.271	8.19285	1.36314	0.883879	0.920329	3.26639	9.62234	5.34039	159.095	6.39952e-07	0.000107469
LTN1	listerin E3 ubiquitin protein ligase 1	2.16366	2.99743	1.55136	0.357074	0.279905	0.066635	3.25831	9.56863	3.47256	34.3276	0.000267848	0.00154949
ECHDC2	enoyl-CoA hydratase domain containing 2	0.357995	0.248551	0.164038	0.0507193	0.0169495	0.0113579	3.25714	9.56085	0.765476	29.8246	0.000437464	0.00212034
HOTAIR	HOX transcript antisense RNA	4.04886	3.81863	3.93717	0.857152	0.100507	0.277819	3.25581	9.55206	2.50807	28.9063	0.000487557	0.00228439
BMP2	bone morphogenetic protein 2	2.8799	4.90131	7.95738	0.749749	0.290496	0.602238	3.25164	9.52445	3.38298	49.8029	6.76296e-05	0.000678508
XXbac-BPG283O16.9		2.96117	4.15391	3.19521	0.570136	0.317549	0.195058	3.25114	9.5212	2.83067	63.8602	2.5983e-05	0.000409166
HBS1L	HBS1 like translational GTPase	6.28842	7.64767	7.82933	0.87782	0.706872	0.689794	3.2508	9.51896	5.4742	227.508	1.42023e-07	6.92739e-05
ABCD3	ATP binding cassette subfamily D member 3	4.3457	5.22934	4.81679	0.573731	0.495631	0.441376	3.2438	9.47283	4.32046	195.972	2.66824e-07	8.86958e-05
RP11-485O10.2		13.0419	11.512	7.56985	1.01194	1.77137	0.566525	3.23542	9.41797	1.30264	43.6529	0.000110914	0.000892409
GDPD3	glycerophosphodiester phosphodiesterase domain containing 3	3.33691	1.55558	9.08231	0.481085	0.553187	0.41703	3.21704	9.29874	2.27152	28.9005	0.000487895	0.00228466
PDK4	pyruvate dehydrogenase kinase 4	0.339981	0.245911	0.693432	0.103903	0.0144678	0.0145424	3.20604	9.22812	0.158493	17.2543	0.00261303	0.0075026
BCLAF1P2	BCL2 associated transcription factor 1 pseudogene 2	18.1815	26.1952	11.9069	3.21694	1.72909	1.23424	3.20329	9.21056	4.77732	55.1235	4.59245e-05	0.000540501
VIPR2	vasoactive intestinal peptide receptor 2	0.530631	0.225324	0.61162	0.0561972	0.0250401	0.0629232	3.19695	9.1702	0.449772	34.1301	0.000272007	0.00156392
ASPM	assembly factor for spindle microtubules	12.634	11.9556	12.2447	2.00148	1.1327	0.877187	3.19685	9.16954	6.21288	114.535	2.49557e-06	0.000161999
SNORD86	small nucleolar RNA, C/D box 86	81.0296	98.4334	136.29	15.3555	11.0233	7.6415	3.19629	9.16596	2.33685	78.16	1.17098e-05	0.000292331
RP11-599J14.2		3.36081	3.10502	2.78711	0	0.735523	0.246439	3.19418	9.15257	-0.421415	13.9737	0.00485609	0.0119148
DSCC1	DNA replication and sister chromatid cohesion 1	12.026	13.2973	8.77421	1.26269	1.26841	1.19921	3.18519	9.09574	4.04505	144.762	9.48477e-07	0.000126521
F7	coagulation factor VII	2.86281	1.04211	4.50972	0.0773285	0.465153	0.346334	3.18351	9.08517	2.54729	21.2476	0.00136749	0.00464399
ST13P11	ST13, Hsp70 interacting protein pseudogene 11	1.82901	2.40594	0.58588	0.244551	0.181611	0.0912735	3.18011	9.06379	-0.497427	19.1397	0.00189819	0.00590423
PSCA	prostate stem cell antigen	7.23618	4.15276	20.526	1.73114	0.982737	0.726875	3.17816	9.0515	3.35573	29.1561	0.000475441	0.00224377
ATP6V1C1	ATPase H+ transporting V1 subunit C1	4.29511	5.10573	2.93019	0.662057	0.391094	0.314489	3.17701	9.04431	3.75108	77.4581	1.2138e-05	0.000299802
GOLGA6L3	golgin A6 family like 3	0.849691	1.14853	1.23826	0.192262	0.0778795	0.078281	3.17657	9.04155	0.0909024	36.8278	0.000206947	0.00130865
ATAD5	ATPase family AAA domain containing 5	7.66635	6.53689	4.75707	1.34391	0.489771	0.278658	3.17419	9.02666	4.63367	37.482	0.000195237	0.00125806
SASS6	SAS-6 centriolar assembly protein	6.24407	7.69385	4.22531	1.30772	0.510265	0.215086	3.17369	9.0235	3.75218	30.428	0.000409919	0.00202531
TRAF5	TNF receptor associated factor 5	0.577776	0.630359	0.537695	0.149626	0.0144934	0.0291363	3.17156	9.01019	1.57175	20.9879	0.00141754	0.0047682
LY6G5B	lymphocyte antigen 6 family member G5B	2.70641	2.14589	1.99813	0.24205	0.237274	0.27102	3.16919	8.99542	1.96002	108.672	3.09467e-06	0.000180545
CTC-366B18.2		2.07402	2.12406	1.47857	0.311365	0.130066	0.174315	3.16226	8.95229	-0.225356	35.0745	0.000246697	0.00146658
SLC12A8	solute carrier family 12 member 8	4.02246	3.45217	0.636494	0.131338	0.30431	0.464701	3.16115	8.94541	3.08863	18.9762	0.00213512	0.00643105
RP1-100J12.1		8.54115	10.3295	9.7594	1.47654	0.719589	0.981621	3.1603	8.94018	1.77879	78.9573	1.12456e-05	0.000287806
LCORL	ligand dependent nuclear receptor corepressor like	1.99421	2.02161	2.19422	0.36737	0.171612	0.159228	3.14997	8.87638	4.09513	88.8593	7.00434e-06	0.000247847
ZNF556	zinc finger protein 556	0.267091	0.188928	0.265834	0	0.0198904	0.059979	3.14125	8.82288	-0.090399	13.3639	0.00550661	0.0131385
RN7SK	RNA component of 7SK nuclear ribonucleoprotein	151.681	188.997	357.566	26.9524	25.0853	26.1081	3.13752	8.80012	5.41025	92.3169	6.00487e-06	0.000228703
POLQ	DNA polymerase theta	5.46078	6.16832	3.42339	1.12077	0.306033	0.314602	3.13173	8.76486	4.72341	36.2624	0.000220031	0.0013595
ACSL5	acyl-CoA synthetase long chain family member 5	4.88342	5.49371	5.01471	0.706636	0.501616	0.542987	3.12843	8.74485	3.60301	161.079	6.07656e-07	0.000107469
AHI1	Abelson helper integration site 1	4.7464	4.61074	4.16053	0.772001	0.458147	0.313297	3.12764	8.74002	4.4494	91.8308	6.13427e-06	0.000231665
TBK1	TANK binding kinase 1	9.4197	11.4142	8.82036	1.69471	1.02285	0.690014	3.12464	8.72189	4.718	85.767	8.07657e-06	0.000263347
PTBP2	polypyrimidine tract binding protein 2	0.398688	0.39665	0.444849	0.111151	0.00505371	0.0253988	3.12415	8.71893	1.59765	17.0434	0.00272014	0.00772028
ACADM	acyl-CoA dehydrogenase medium chain	19.4966	20.2476	25.6582	4.14761	1.7975	1.56632	3.12288	8.71124	5.85333	73.757	1.47427e-05	0.000321484
SECISBP2L	SECIS binding protein 2 like	3.44084	3.63328	2.27567	0.620726	0.236747	0.222859	3.12226	8.70752	3.92522	53.3696	5.19794e-05	0.000583093
TRPM2	transient receptor potential cation channel subfamily M member 2	0.7447	0.658076	0.431405	0.017507	0.0292527	0.16172	3.122	8.70593	1.23174	17.9652	0.00230991	0.00682862
JAKMIP3	Janus kinase and microtubule interacting protein 3	1.55062	1.66258	1.86536	0.308582	0.206245	0.064784	3.11994	8.69351	2.84994	42.7145	0.000120231	0.000938605
ANKRD36B	ankyrin repeat domain 36B	2.69855	2.75146	2.59435	0.424741	0.260708	0.237788	3.11592	8.66936	3.34431	119.05	2.12924e-06	0.000153904
DIO2	iodothyronine deiodinase 2	25.0043	68.0337	14.6152	6.80201	1.60527	4.45041	3.11545	8.66652	7.26433	20.7524	0.00162156	0.00525675
SLC2A3P1	solute carrier family 2 member 3 pseudogene 1	14.3699	9.4607	9.26148	2.40675	0.720935	0.679362	3.11493	8.66338	3.15648	40.5435	0.000145754	0.00105029
THOC2	THO complex 2	32.406	42.0983	45.6523	7.62423	3.81706	2.49068	3.11475	8.66229	7.83965	65.8539	2.304e-05	0.000388809
XRCC2	X-ray repair cross complementing 2	11.6174	12.9041	7.85404	2.08622	0.862211	0.826032	3.11223	8.64719	4.87483	60.8221	3.14128e-05	0.000443457
RP11-479G22.8		0.69355	1.41416	0.498032	0.171198	0.0317841	0.0958439	3.11194	8.64547	0.0928654	20.5804	0.00150927	0.00499521
NPM1P35	nucleophosmin 1 pseudogene 35	1.80162	2.22164	1.52738	0.473325	0.150645	0	3.11077	8.63845	-0.0617853	13.8521	0.00497789	0.0121459
HECW2	HECT, C2 and WW domain containing E3 ubiquitin protein ligase 2	0.168606	0.239494	0.156685	0.0416192	0.00515126	0.0181224	3.10555	8.60724	0.483644	24.0674	0.000906872	0.00346506
NPM1P24	nucleophosmin 1 pseudogene 24	11.1398	7.93348	8.22366	1.37868	0.950713	0.808598	3.10104	8.58036	2.19313	92.5954	5.93221e-06	0.000227371
GLCCI1	glucocorticoid induced 1	1.51422	1.85615	1.30414	0.196067	0.16618	0.181354	3.09742	8.55884	2.60057	110.915	2.84655e-06	0.000172243
ANO7	anoctamin 7	0.327585	0.327132	0.148142	0.0515297	0.00574011	0.0346182	3.09581	8.54933	-0.127273	19.8629	0.00168925	0.0054126
RBBP6	RB binding protein 6, ubiquitin ligase	21.3746	21.5103	35.0117	3.64206	2.74522	2.62752	3.09536	8.54667	7.19779	154.463	7.23955e-07	0.000113306
TGFBR3	transforming growth factor beta receptor 3	1.82796	2.44805	1.28762	0.482079	0.075106	0.105691	3.09178	8.52546	3.19035	22.6442	0.00115048	0.00410306
ZHX1	zinc fingers and homeoboxes 1	14.029	18.0271	10.6024	2.59462	1.60031	0.853024	3.08971	8.51325	5.7512	57.3905	3.93285e-05	0.000497844
RP11-54O7.1		1.4786	0.676675	1.43575	0.163945	0.032228	0.215961	3.08887	8.50831	1.05068	26.0352	0.00069706	0.00290701
TXNRD1	thioredoxin reductase 1	161.323	228.28	158.578	21.9615	16.959	25.6088	3.08791	8.50262	9.42578	144.366	9.5932e-07	0.000126521
HMMR-AS1	HMMR antisense RNA 1	12.1839	14.8224	22.8265	2.82116	1.81041	1.20172	3.08041	8.45854	3.15113	65.605	2.33842e-05	0.000390785
RP11-1100L3.8		23.2375	17.1817	46.8265	0.384868	4.93028	4.63251	3.0784	8.44675	3.87792	15.5401	0.00385206	0.010016
ESRP2	epithelial splicing regulatory protein 2	3.1859	2.76141	2.45359	0.912617	0.0646394	0.029533	3.07733	8.44053	3.12604	9.96741	0.0125701	0.0252223
RP11-575L7.4		0.369181	0.413946	0.286204	0.0542014	0.0431265	0.0260093	3.0746	8.42457	-0.289403	34.2007	0.000270006	0.00155737
RARA-AS1	RARA antisense RNA 1	1.04223	0.566044	1.39713	0.196734	0.0913126	0.0550701	3.07333	8.41715	0.0763961	27.208	0.000600222	0.00261225
SBNO1	strawberry notch homolog 1	7.39153	8.09178	5.29269	1.01567	0.816954	0.640982	3.06891	8.39141	5.43413	126.552	1.65536e-06	0.000146979
RP11-144L1.8		2.83594	1.96077	2.32204	0.690657	0.120683	0.0303262	3.06588	8.37376	1.54406	14.8771	0.00406744	0.0104327
HTR2C	5-hydroxytryptamine receptor 2C	0.226644	0.175505	0.367147	0.0606075	0	0.0271445	3.06587	8.37373	-0.413502	13.8605	0.00496937	0.0121287
HSPA8	heat shock protein family A (Hsp70) member 8	328.085	428.754	243.452	33.056	35.2652	50.9174	3.06555	8.37184	9.8294	104.327	3.65553e-06	0.000199
RSPH1	radial spoke head component 1	0.982453	0.787577	1.46218	0.157141	0.131285	0.0879745	3.06444	8.36544	0.885114	52.4921	5.5376e-05	0.000605342
SNORA31	small nucleolar RNA, H/ACA box 31	0.58015	0.611018	0.11081	0.0719489	0.0801469	0	3.0636	8.36055	-0.21678	10.1567	0.0114288	0.0234291
MIR221	microRNA 221	9.47762	13.3709	4.10877	1.06713	0.297181	1.79228	3.06286	8.35627	-0.694145	16.412	0.0030384	0.0083682
ARC	activity regulated cytoskeleton associated protein	5.90715	5.68235	0.221625	0.431705	0.502753	0.483374	3.06045	8.34231	2.74961	10.62	0.0107387	0.0223179
S100A4	S100 calcium binding protein A4	33.4844	23.9473	32.6002	3.5788	3.25304	3.81479	3.05739	8.32464	4.09749	181.965	3.64549e-07	9.84906e-05
ZNF136	zinc finger protein 136	0.379289	0.530181	0.522085	0.0973698	0.0241032	0.0484549	3.0541	8.30567	0.59438	33.5362	0.000289562	0.00162412
FAR1	fatty acyl-CoA reductase 1	5.39122	6.77132	3.72369	1.06415	0.601414	0.262833	3.05347	8.30208	4.48671	40.6374	0.000145372	0.00105014
RP11-96K19.2		0.534981	1.08071	0.166046	0.0746405	0.0554301	0.0835739	3.05076	8.28647	-0.224721	15.9057	0.00333536	0.00898992
IGFN1	immunoglobulin like and fibronectin type III domain containing 1	0.31022	1.38119	0.106936	0.0435978	0.07015	0.10848	3.05059	8.2855	2.09271	11.3574	0.00905156	0.0195194
MAN1A1	mannosidase alpha class 1A member 1	2.07926	1.35588	1.27399	0.222408	0.143434	0.1966	3.04634	8.26112	2.15206	83.6808	8.91508e-06	0.000271191
HMGB1P35	high mobility group box 1 pseudogene 35	2.38567	1.96763	1.8139	0.392591	0.218662	0.109895	3.04163	8.23419	-0.414892	28.4619	0.000514326	0.00235991
PRKD3	protein kinase D3	6.79453	7.08631	5.79441	1.10292	0.753106	0.535666	3.03846	8.21612	5.23614	112.427	2.69308e-06	0.000166833
USPL1	ubiquitin specific peptidase like 1	3.41	4.91064	1.8108	0.532525	0.427361	0.282102	3.03653	8.20514	3.3028	48.3103	7.58737e-05	0.000717603
AC018816.3		9.75913	18.9157	8.83938	1.59516	1.5156	1.49715	3.03269	8.18337	3.16051	63.8434	2.60097e-05	0.000409166
PNISR	PNN interacting serine and arginine rich protein	52.2935	58.823	68.5944	8.55007	7.22065	6.05176	3.03142	8.17616	8.50691	220.146	1.63253e-07	7.01512e-05
AC084219.4		4.15304	3.3078	3.26534	0.639423	0.318652	0.348556	3.0266	8.14885	2.8119	86.4906	7.80856e-06	0.000259918
RP11-461A8.4		5.47163	4.03965	2.00309	0.631987	0.397911	0.369196	3.02425	8.13563	1.24052	40.1895	0.000150525	0.00107649
PNPT1	polyribonucleotide nucleotidyltransferase 1	10.009	12.6434	9.52523	1.47474	1.31167	1.16483	3.02199	8.1229	4.956	163.558	5.70067e-07	0.000107469
CCDC150	coiled-coil domain containing 150	1.45917	1.55608	1.35049	0.266701	0.121536	0.14931	3.01907	8.10646	2.99321	83.5343	8.97789e-06	0.000271191
PNN	pinin, desmosome associated protein	429.664	487.388	511.387	78.119	49.0932	49.0257	3.01655	8.09233	10.1295	178.452	3.95658e-07	9.84906e-05
RP11-423P10.2		16.5131	18.8561	18.7536	3.58821	1.78793	1.33058	3.0156	8.08699	5.26703	74.3075	1.43146e-05	0.000317005
PDE10A	phosphodiesterase 10A	0.673216	1.00584	0.900415	0.102193	0.0900111	0.125069	3.01494	8.08325	2.59322	93.668	5.66239e-06	0.000226112
CCDC152	coiled-coil domain containing 152	3.57434	1.24793	3.15273	0.615833	0.161973	0.191539	3.0148	8.08248	2.3479	27.9934	0.000544527	0.00245565
CACNB4	calcium voltage-gated channel auxiliary subunit beta 4	0.0764023	0.0973288	0.0714476	0.00647318	0.0144215	0.00905991	3.0103	8.05734	0.791995	43.4149	0.00011319	0.000905354
HOXA5	homeobox A5	2.57155	1.91473	2.84188	0.532941	0.038301	0.327237	3.00838	8.04661	1.254	21.3677	0.00133815	0.00456818
RP3-382I10.7		0.544041	0.453694	0.469463	0.0581935	0.0833454	0.0372334	2.99585	7.97704	0.0440199	38.1767	0.000181623	0.00120862
AC019097.7		2.91149	3.11281	3.27956	0.878389	0.0889521	0.178822	2.99401	7.96684	0.422005	18.597	0.00207611	0.006307
APH1B	aph-1 homolog B, gamma-secretase subunit	0.444437	0.428337	0.263248	0.128196	0.0119002	0	2.99269	7.95955	0.301578	9.53405	0.0133798	0.0264589
PBX1	PBX homeobox 1	2.81854	3.05326	2.71688	0.881117	0.0907668	0.128347	2.99234	7.95763	5.097	15.7075	0.00373532	0.0097922
ZNF551	zinc finger protein 551	0.780701	0.763493	0.383915	0.087247	0.027768	0.1256	2.99191	7.95524	0.823765	27.2286	0.000598671	0.00260725
TRAPPC8	trafficking protein particle complex subunit 8	1.42923	1.75944	1.01374	0.273906	0.141914	0.114117	2.99187	7.95505	2.87856	56.247	4.24987e-05	0.000521321
PLIN4	perilipin 4	2.12241	1.63372	5.35239	0.221157	0.472601	0.419448	2.98624	7.92404	3.45671	35.4555	0.000237313	0.00142695
KNTC1	kinetochore associated 1	4.98316	4.6321	4.93004	1.41483	0.271333	0.174085	2.98398	7.91163	4.94538	19.23	0.00205049	0.0062525
ASPH	aspartate beta-hydroxylase	92.749	75.342	67.7349	10.2383	11.2239	8.02817	2.98286	7.90553	9.78634	188.756	3.12497e-07	9.48533e-05
JAM3	junctional adhesion molecule 3	0.447943	0.509664	0.403515	0.043069	0.0659675	0.0602797	2.98255	7.90384	0.541874	49.1548	7.10668e-05	0.000695475
ACRC	germ cell nuclear acidic peptidase	2.06844	2.98773	0.99854	0.113462	0.325003	0.326679	2.97892	7.88395	2.0787	28.0106	0.000543384	0.00245412
BCLAF1	BCL2 associated transcription factor 1	50.6063	74.4778	43.1303	10.7985	6.12518	4.70063	2.97513	7.86326	8.20842	69.8931	1.82353e-05	0.000350894
CTD-2353F22.2		0.734217	0.6706	0.241908	0.130893	0.0291614	0.0439676	2.97162	7.84415	-0.399692	17.1816	0.00264674	0.00756869
WDR75	WD repeat domain 75	4.89567	5.5872	4.69867	0.81678	0.619469	0.492942	2.97099	7.84074	3.85853	125.309	1.72417e-06	0.000146979
EIF2A	eukaryotic translation initiation factor 2A	36.8858	40.5648	41.3854	8.30445	3.84587	3.06234	2.97079	7.83967	6.5238	71.4301	1.67358e-05	0.000336306
ZNF224	zinc finger protein 224	2.37509	1.90015	1.87894	0.388308	0.193268	0.19889	2.96999	7.83529	3.04092	83.2245	9.11254e-06	0.000271191
RP4-613B23.1		15.5175	17.9869	5.71912	2.87854	1.08272	1.08831	2.96991	7.83488	2.5586	28.92	0.000486758	0.00228262
IFT80	intraflagellar transport 80	2.74543	2.50543	2.09552	0.543978	0.282477	0.10991	2.96967	7.83357	3.31277	37.0638	0.000202215	0.0012899
PRTG	protogenin	0.408722	0.626045	0.293739	0.0523823	0.0628393	0.05414	2.96867	7.82815	1.8988	55.1589	4.58117e-05	0.000539631
TLE2	TLE family member 2, transcriptional corepressor	3.05062	1.31936	4.77559	0.712215	0.194294	0.244119	2.96533	7.81002	2.77811	26.148	0.000686956	0.0028718
MPHOSPH10	M-phase phosphoprotein 10	36.4296	46.5962	33.0261	6.8263	5.05774	3.02357	2.96459	7.80601	6.6765	86.1055	7.94982e-06	0.000261942
PRG4	proteoglycan 4	0.620067	0.622067	0.764624	0.116361	0.0777714	0.0586293	2.96318	7.79839	0.967823	57.2114	3.98053e-05	0.000501211
DGCR5	DiGeorge syndrome critical region gene 5	0.776263	0.285749	1.06328	0.172597	0.0415704	0.0522309	2.9589	7.77533	1.33889	21.5539	0.00130123	0.00447687
TBATA	thymus, brain and testes associated	2.15711	0.989861	4.01863	0.239281	0.456935	0.191371	2.95884	7.775	1.22359	25.8573	0.000713383	0.00294975
ELOVL6	ELOVL fatty acid elongase 6	5.84648	5.1376	7.43261	0.997375	0.739185	0.612409	2.95498	7.75422	4.65065	138.883	1.12667e-06	0.000134844
AC090094.1		724.102	598.648	524.554	81.0838	89.2927	65.4019	2.95385	7.74814	9.56553	188.443	3.14682e-07	9.48533e-05
LINC00165	long intergenic non-protein coding RNA 165	19.0781	21.8954	24.4997	0.712285	2.97542	4.62571	2.95005	7.72777	3.34827	27.2235	0.000601669	0.00261475
KIF11	kinesin family member 11	24.2965	24.0022	20.3663	5.6277	1.7623	1.58884	2.9486	7.71999	5.97108	41.6562	0.000132711	0.000994607
KCNQ1OT1	KCNQ1 opposite strand/antisense transcript 1	0.0613549	0.0434999	0.0308978	0.00736319	0.00641909	0.00358455	2.94378	7.69426	1.26244	46.2963	8.90528e-05	0.000791914
YOD1	YOD1 deubiquitinase	2.22561	1.66405	1.705	0.35102	0.150391	0.22171	2.9412	7.68052	2.78407	74.9351	1.3845e-05	0.00031283
CEBPZ	CCAAT enhancer binding protein zeta	53.0938	59.0914	47.6831	9.97883	6.62085	4.3099	2.93656	7.65581	6.7726	92.6871	5.90855e-06	0.000227371
DDX46	DEAD-box helicase 46	68.7933	86.6021	76.9349	14.5681	8.47555	7.46103	2.93361	7.64022	8.65753	114.679	2.48276e-06	0.000161999
DHX9	DExH-box helicase 9	39.2064	48.329	27.8411	7.81351	3.30663	4.1677	2.93137	7.62837	6.94681	67.0301	2.14952e-05	0.000372211
RP11-120K9.2		1.53927	1.88772	2.93354	0.532686	0.161831	0.108444	2.93017	7.62203	-0.351703	20.1382	0.00161725	0.0052459
KB-1608C10.2		1.38308	1.70762	1.51898	0.322781	0.0898898	0.180707	2.92715	7.60607	0.013069	30.1436	0.000421562	0.00206307
RP11-637A17.2		8.53433	10.3281	5.35897	1.8567	0.74687	0.612126	2.9266	7.60319	3.71336	40.9245	0.000140825	0.00103222
RGPD3	RANBP2 like and GRIP domain containing 3	0.462126	0.410101	0.29002	0.0605283	0.04495	0.0451818	2.92198	7.57888	0.41948	45.2512	9.69999e-05	0.000832297
SH3D21	SH3 domain containing 21	1.49624	0.920483	1.25939	0.190219	0.189973	0.0954761	2.91919	7.56422	1.6493	58.3306	3.69374e-05	0.000481369
RP11-325P15.2		2.60867	1.10616	2.64647	0.449297	0.0526832	0.317729	2.91766	7.55621	0.616235	19.8276	0.00169879	0.00543567
UBXN8	UBX domain protein 8	4.01678	7.58946	3.16576	0.602066	0.56905	0.796693	2.91695	7.5525	3.19282	51.0685	6.14876e-05	0.000646951
CTD-2349P21.11		2.10709	1.89549	0.85009	0.413974	0.204952	0	2.91515	7.54304	-0.626765	11.5417	0.00820993	0.0180123
CH507-338C24.1		1.30862	1.42453	0.945224	0.222605	0.0714488	0.194329	2.9141	7.53756	2.45128	46.245	8.94237e-05	0.000792783
GPLD1	glycosylphosphatidylinositol specific phospholipase D1	1.04297	1.27575	1.37209	0.178976	0.093039	0.213757	2.91342	7.53403	1.79927	59.7837	3.35827e-05	0.000460327
NOL11	nucleolar protein 11	18.2436	23.1905	17.5236	3.06351	2.88542	1.86846	2.91152	7.52409	5.71759	118.216	2.19161e-06	0.000156212
RP3-467L1.4		3.50378	1.26012	1.01647	0.388925	0.118156	0.237531	2.91091	7.52092	-0.0514987	18.8975	0.00197516	0.0060784
RP11-332H14.2		1.70227	1.46886	0.908559	0.136138	0.303299	0.0952696	2.90587	7.49471	1.44401	32.2961	0.00033094	0.00176672
BLM	BLM RecQ like helicase	3.76496	4.09616	2.88845	0.810816	0.354295	0.275869	2.90548	7.49267	3.74097	51.4679	5.96927e-05	0.000634215
DLGAP5	DLG associated protein 5	16.3773	17.3895	19.7696	3.56123	1.83641	1.7742	2.89802	7.45401	5.20907	98.8032	4.56111e-06	0.000209721
ANKRD36C	ankyrin repeat domain 36C	1.49111	1.15124	1.17375	0.30462	0.0533775	0.153294	2.89735	7.45056	2.63376	32.0504	0.000339984	0.00180199
NEB	nebulin	0.0592379	0.0951653	0.0453438	0.0201613	0.0042778	0.00214993	2.89593	7.44326	0.288812	15.2711	0.00375986	0.00983773
RP11-446E9.1		1.73522	2.6818	1.44217	0.501644	0.223521	0.0561683	2.89268	7.42648	0.447664	18.8	0.00200725	0.00615092
ZNF354A	zinc finger protein 354A	1.05198	0.643264	1.07355	0.298739	0	0.0668988	2.89266	7.42638	0.668427	10.3063	0.011033	0.0227927
CSE1L	chromosome segregation 1 like	58.1194	65.799	56.2577	14.8816	5.51427	4.13325	2.89131	7.41945	7.01603	44.0915	0.00010753	0.000878767
LINC00330	long intergenic non-protein coding RNA 330	0.997155	1.26821	0.858348	0.0288273	0.160559	0.225942	2.89099	7.41782	0.342945	19.8965	0.00168026	0.0053944
VPS50	VPS50 subunit of EARP/GARPII complex	1.25365	1.45894	1.16011	0.316618	0.0899024	0.118171	2.88983	7.41182	2.80434	40.8886	0.000141281	0.00103308
SMC6	structural maintenance of chromosomes 6	14.5135	18.2586	14.8416	3.73399	1.64381	1.11713	2.88702	7.39743	6.46969	49.6925	6.82008e-05	0.000681464
TTK	TTK protein kinase	5.15272	6.1957	5.20498	1.26895	0.514015	0.466434	2.88598	7.39207	3.84788	55.2148	4.56337e-05	0.000539417
CENPF	centromere protein F	65.2085	60.3027	53.8543	12.8681	6.10734	5.40801	2.88335	7.3786	8.62732	80.9429	1.01844e-05	0.000278139
ZNF192P1	ZKSCAN8 pseudogene 1	0.833338	0.477051	0.594299	0.0694584	0.103163	0.0777715	2.8831	7.37736	-0.0410071	35.4314	0.000237894	0.00142881
IPO7P2	importin 7 pseudogene 2	0.971991	2.16651	1.44629	0.318615	0.224159	0.0751051	2.88087	7.36594	0.667303	24.4361	0.000862188	0.00335979
FAM173B	ATP synthase c subunit lysine N-methyltransferase	1.47094	1.56652	1.51756	0.238393	0.212445	0.160155	2.87725	7.34749	1.12482	67.1339	2.13651e-05	0.000370746
COPS2	COP9 signalosome subunit 2	9.47264	13.6613	8.53376	1.8991	1.40597	1.03257	2.87452	7.3336	5.50289	86.8621	7.6752e-06	0.000257215
AATK	apoptosis associated tyrosine kinase	1.89512	0.908339	3.54795	0.131999	0.273072	0.432834	2.87352	7.32849	2.88714	25.6621	0.000731837	0.00299676
CATSPER2	cation channel sperm associated 2	0.329758	0.237267	0.383674	0.0523852	0.0466832	0.0273723	2.87293	7.3255	0.644216	44.8592	0.000100204	0.000849486
MIR600HG	MIR600 host gene	2.00813	2.0537	1.47533	0.16674	0.267681	0.31299	2.87287	7.32523	2.66446	68.7215	1.94904e-05	0.000360466
TRMT10C	tRNA methyltransferase 10C, mitochondrial RNase P subunit	14.6622	17.554	14.9538	2.67349	2.18164	1.56635	2.87164	7.31899	4.08132	114.274	2.51906e-06	0.000161999
EIF4HP2	eukaryotic translation initiation factor 4H pseudogene 2	5.01923	4.52822	1.92667	0.208498	0.580638	0.758721	2.86987	7.30998	0.368215	21.5404	0.00130386	0.00447985
LUC7L3	LUC7 like 3 pre-mRNA splicing factor	141.094	162.568	158.285	27.5496	21.3722	14.1335	2.86919	7.30655	9.4756	125.655	1.70467e-06	0.000146979
NPM1P21	nucleophosmin 1 pseudogene 21	2.88034	2.57358	3.51923	0.77024	0.343201	0.0862427	2.86838	7.30246	0.432263	20.9016	0.00143638	0.00481467
LINC01411	long intergenic non-protein coding RNA 1411	1.84105	1.57401	1.58584	0.494251	0.0516156	0.138351	2.86771	7.29905	1.86527	20.0461	0.00164091	0.00530743
ATAD2	ATPase family AAA domain containing 2	38.7477	41.5145	25.1994	10.1215	2.60399	1.99422	2.86742	7.29759	7.15565	24.2561	0.00098871	0.00367893
RMDN2	regulator of microtubule dynamics 2	0.109759	0.408624	0.231043	0.0684858	0.0326954	0	2.86684	7.29465	-0.124158	9.72231	0.0127492	0.0254802
CCT8	chaperonin containing TCP1 subunit 8	90.5338	110.067	140.734	22.3105	11.7609	12.6772	2.86652	7.29305	7.74874	101.499	4.08838e-06	0.000207559
NUP107	nucleoporin 107	10.4135	12.6024	9.91569	2.44786	1.24159	0.857006	2.86538	7.28728	5.70123	60.7637	3.15302e-05	0.00044396
SLC16A7	solute carrier family 16 member 7	1.042	1.12895	0.568883	0.240525	0.0669826	0.0721371	2.8638	7.27929	2.84418	29.3183	0.000464259	0.00220764
TOP2B	DNA topoisomerase II beta	55.403	65.5033	78.2741	15.6169	6.76491	5.11336	2.86293	7.2749	7.8365	54.3423	4.88545e-05	0.000563576
KIF5B	kinesin family member 5B	45.7487	61.7039	41.7896	8.06932	7.80397	4.64055	2.86257	7.27309	7.38342	97.8453	4.74508e-06	0.00021362
RGPD1	RANBP2 like and GRIP domain containing 1	1.18988	1.21776	1.51291	0.243448	0.152245	0.138684	2.86067	7.26355	2.36182	83.5171	8.98531e-06	0.000271191
WDR19	WD repeat domain 19	1.60783	1.60236	1.45001	0.291047	0.198947	0.148128	2.86001	7.26019	2.97837	89.3882	6.8389e-06	0.000246343
BTBD3	BTB domain containing 3	8.87636	9.46737	8.32617	1.70573	0.69285	1.28733	2.85768	7.24848	4.97745	82.9867	9.21756e-06	0.00027131
RP11-95D17.1		0.645335	0.323709	0.466279	0.0908269	0.0202352	0.081358	2.85531	7.23661	-0.0945786	23.3241	0.00100596	0.00372814
EFCAB7	EF-hand calcium binding domain 7	0.557939	0.641771	0.69728	0.180069	0.0114621	0.0691272	2.85442	7.23214	1.07502	17.3937	0.00254993	0.00736954
FERP1	FER tyrosine kinase pseudogene 1	2.31798	3.05	2.24177	0.333059	0.453454	0.248614	2.85302	7.22509	0.273424	37.7981	0.000188326	0.00123009
AC009404.2		0.507058	0.249684	0.348979	0.0433901	0.0402783	0.0647777	2.85272	7.22362	-0.137297	31.1452	0.00037603	0.00192146
EIF5B	eukaryotic translation initiation factor 5B	157.745	187.939	216.329	35.5817	24.9228	17.0982	2.85243	7.22215	9.70974	105.687	3.46748e-06	0.000193715
PRPF4B	pre-mRNA processing factor 4B	42.0762	58.0493	29.0575	7.90132	5.79841	4.38587	2.84679	7.19397	7.6013	74.4601	1.41986e-05	0.000315566
HSPA8P1	heat shock protein family A (Hsp70) member 8 pseudogene 1	2.93361	2.60334	1.62737	0.384238	0.285346	0.322669	2.83805	7.15053	1.35437	56.1634	4.27424e-05	0.000523162
ZWILCH	zwilch kinetochore protein	7.34397	9.48382	7.37584	2.03347	0.76854	0.616647	2.83663	7.14348	4.48479	43.31	0.000114211	0.000909945
RP11-90H3.1		1.01783	0.624661	0.609733	0.230942	0.0735018	0	2.83364	7.12871	-0.284737	11.1152	0.00906548	0.0195468
TIGD7	tigger transposable element derived 7	1.97413	2.04813	1.65121	0.300664	0.109044	0.383623	2.83286	7.12487	2.19628	42.0569	0.000127337	0.000970348
RP11-147L13.13		1.3843	0.908234	1.38812	0.0965687	0.215144	0.192225	2.83056	7.11349	0.971015	41.9848	0.000128146	0.000974367
RP11-477N12.6		0.488979	0.957024	0.805538	0.224159	0.0832334	0	2.82704	7.09619	-0.447615	10.9324	0.00946596	0.0201748
CTB-13F3.1		3.90678	4.96804	3.18183	0.892123	0.67995	0.105147	2.82687	7.09531	0.583065	19.9381	0.00166922	0.00537378
COPB1	COPI coat complex subunit beta 1	42.2249	39.4685	34.5352	7.06916	5.2625	3.99604	2.8261	7.09153	6.82143	137.242	1.18363e-06	0.000135948
FAM69B	divergent protein kinase domain 1B	0.629062	0.495585	0.0780017	0.15194	0	0.0121518	2.82546	7.08842	-0.549813	6.30607	0.0338819	0.0565289
CCDC144A	coiled-coil domain containing 144A	0.170941	0.172156	0.0387088	0.0452407	0	0.00844257	2.82045	7.06382	0.261674	7.61098	0.0227143	0.0407316
RP11-1319K7.1		0.58834	0.534904	0.221051	0.140769	0	0.0463579	2.82007	7.06194	-0.0433354	9.86593	0.0122928	0.0247847
CTD-2033A16.1		6.25046	8.0148	10.5851	1.48007	0.966484	1.02861	2.8197	7.06016	1.46866	59.5795	3.40308e-05	0.000460905
BRCC3	BRCA1/BRCA2-containing complex subunit 3	12.5795	18.0884	12.9633	3.04344	1.74648	1.42504	2.81968	7.06005	4.73191	73.3035	1.51073e-05	0.000324407
ZNF420	zinc finger protein 420	0.320521	0.268105	0.269628	0.116714	0	0	2.81802	7.05196	-0.48134	7.06623	0.0266941	0.0465502
ZNF300	zinc finger protein 300	0.951619	1.11146	1.13392	0.425789	0.014822	0.0148984	2.81487	7.03657	1.4521	8.03086	0.0208692	0.0379922
NEK10	NIMA related kinase 10	0.114528	0.163729	0.0943361	0.0245011	0.00682319	0.0205751	2.81449	7.03469	-0.429	22.061	0.00120685	0.0042345
CCDC18	coiled-coil domain containing 18	10.4033	12.2603	11.7571	2.51628	1.4218	0.96248	2.81429	7.03371	5.2056	70.5143	1.76102e-05	0.000346184
EXTL2	exostosin like glycosyltransferase 2	2.12263	2.40705	1.85124	0.431026	0.24345	0.23111	2.81383	7.03148	2.56914	72.5629	1.57267e-05	0.000326099
AC005363.9		21.4948	28.9597	59.4893	5.93612	6.14682	3.27649	2.81326	7.02871	2.87412	40.5503	0.000145665	0.00105029
EPGN	epithelial mitogen	1.40655	1.04504	1.02983	0.194131	0.252293	0.0362276	2.81251	7.02504	0.333927	21.5318	0.00130555	0.00448322
CTD-2515O10.5		30.337	30.2331	50.2955	7.61871	4.02337	4.04412	2.80782	7.00228	3.45098	68.1811	2.01049e-05	0.000362803
SUCLA2	succinate-CoA ligase ADP-forming subunit beta	10.9615	14.1215	16.7071	3.07102	1.87654	1.02657	2.80445	6.9859	4.96769	54.7952	4.69892e-05	0.000549062
MIR568	microRNA 568	0.261477	0.227721	0.225774	0.0578668	0.0343788	0.00863901	2.80413	6.98437	1.0881	25.1242	0.000785814	0.00314422
ICE1	interactor of little elongation complex ELL subunit 1	13.9674	15.9618	9.05873	2.73239	1.53693	1.35175	2.80356	6.98161	6.01671	69.2212	1.89425e-05	0.000355625
SCN3B	sodium voltage-gated channel beta subunit 3	0.173934	0.265924	0.0350212	0.0124033	0.0345413	0.0208317	2.79912	6.96015	-0.107275	11.9783	0.00743496	0.0165931
IREB2	iron responsive element binding protein 2	3.46304	3.83224	3.79495	0.703374	0.481001	0.404421	2.79809	6.95518	4.51364	121.865	1.93398e-06	0.000151343
ARHGAP42	Rho GTPase activating protein 42	1.30776	1.26144	1.11082	0.380351	0.0847377	0.0662469	2.79562	6.94327	2.29812	22.2781	0.00116903	0.00414222
PDS5A	PDS5 cohesin associated factor A	12.7622	15.662	14.2952	3.1116	1.71432	1.3516	2.79468	6.93879	6.63506	81.7594	9.78382e-06	0.000277049
PNPLA1	patatin like phospholipase domain containing 1	0.723407	1.10959	1.6287	0.0773795	0.258589	0.151621	2.7943	6.93695	1.03959	26.7458	0.000636277	0.00272317
CHRD	chordin	1.60384	0.414727	1.10146	0.221648	0.0790088	0.138978	2.794	6.93551	1.97275	27.3435	0.000590126	0.00258546
GABRE	gamma-aminobutyric acid type A receptor subunit epsilon	3.07119	2.89712	1.28524	0.454908	0.25167	0.341848	2.79365	6.93383	3.74327	50.6382	6.34956e-05	0.000659552
CPLX1	complexin 1	5.92274	8.81318	5.93149	0.388369	1.29786	1.26379	2.79231	6.92738	3.26928	34.3141	0.000266832	0.00154563
GREB1L	GREB1 like retinoic acid receptor coactivator	1.49736	1.51489	0.658367	0.252601	0.148422	0.130539	2.79076	6.91994	2.90517	43.8982	0.000108627	0.000883564
CEP192	centrosomal protein 192	1.67366	1.65056	0.855146	0.302324	0.0990503	0.20576	2.78949	6.91385	2.9948	39.5028	0.00016034	0.0011139
AC004549.6		4.91067	6.83902	3.94994	1.25769	0.604351	0.414182	2.7892	6.91248	1.86496	36.6159	0.000211309	0.00132593
TH	tyrosine hydroxylase	1.16746	0.685336	1.19855	0.126687	0.191523	0.111453	2.78778	6.90567	0.949731	44.8164	0.000100562	0.00085031
KIF20B	kinesin family member 20B	17.7322	20.6431	17.7769	4.91316	2.09471	1.19904	2.78663	6.90017	6.19798	38.5701	0.00017596	0.00118316
LHFPL5	LHFPL tetraspan subfamily member 5	4.0861	4.98932	4.43671	0.614476	0.68449	0.643631	2.78565	6.89549	2.94375	113.786	2.56369e-06	0.000161999
DDX18	DEAD-box helicase 18	13.632	16.744	10.0974	2.44084	2.14852	1.28906	2.78482	6.89152	5.92921	78.2542	1.16537e-05	0.000291379
ZNF292	zinc finger protein 292	3.17653	2.51955	1.37251	0.496256	0.323712	0.20524	2.78353	6.88533	4.1496	46.4166	8.81906e-05	0.000787164
RAD18	RAD18 E3 ubiquitin protein ligase	4.80107	6.10815	4.57811	1.25655	0.631983	0.37644	2.78218	6.87892	4.37437	46.0707	9.06989e-05	0.0008006
ADGRA3	adhesion G protein-coupled receptor A3	5.86372	6.13054	6.5148	0.732861	0.77749	1.15804	2.77779	6.858	5.02792	124.94	1.74524e-06	0.000146979
TPR	translocated promoter region, nuclear basket protein	64.1807	82.7962	58.6273	18.1614	7.37442	4.87689	2.77627	6.85079	8.92586	38.7225	0.000182487	0.00121231
EDEM3	ER degradation enhancing alpha-mannosidase like protein 3	1.78238	2.36631	1.17373	0.518935	0.142421	0.126314	2.77552	6.84723	3.00749	24.861	0.000814	0.00322136
GNL2	G protein nucleolar 2	58.1321	73.9198	63.372	11.3145	8.93922	8.25322	2.77503	6.8449	7.74543	175.286	4.2653e-07	9.84906e-05
AC068134.8		36.7551	19.9952	27.9154	10.0122	1.05761	1.353	2.77344	6.83738	3.44847	13.3207	0.00592891	0.0139136
TTLL7	tubulin tyrosine ligase like 7	0.301858	0.477417	0.240065	0.100205	0.0124025	0.0373994	2.77205	6.8308	1.0891	18.1101	0.00225354	0.00670149
STAG1	stromal antigen 1	10.9517	16.5047	8.13759	3.25404	1.14161	0.917156	2.77151	6.82823	5.75142	30.7587	0.000412025	0.00203105
SLC39A8	solute carrier family 39 member 8	10.3263	9.66915	7.52809	1.77979	1.3419	0.897523	2.77095	6.82558	5.0904	93.3645	5.73719e-06	0.000226112
TPRXL	tetrapeptide repeat homeobox like (pseudogene)	0.944275	1.56969	2.92627	0.657705	0.0348878	0.105203	2.76956	6.81901	1.97159	10.075	0.0122427	0.0247035
AHSA2	activator of HSP90 ATPase homolog 2, pseudogene	8.43808	6.67181	10.7482	1.83807	0.912603	1.01923	2.76708	6.80728	5.35854	86.1238	7.94304e-06	0.000261942
CTD-2017F17.2		2.26868	2.51419	2.43365	0.33861	0.628652	0.0631894	2.76394	6.79251	-0.361503	16.9097	0.00277759	0.00784021
DNAJB4	DnaJ heat shock protein family (Hsp40) member B4	12.3651	23.8114	4.97005	3.54512	1.36532	1.32025	2.76162	6.78159	4.92603	19.8854	0.00185045	0.00579337
NPM1P31	nucleophosmin 1 pseudogene 31	2.26233	2.73797	2.24799	0.537757	0.171151	0.344068	2.76085	6.77797	0.164137	30.0196	0.000427656	0.00208412
HLTF	helicase like transcription factor	13.9863	13.2713	16.3159	3.0301	2.02955	1.34183	2.75881	6.76837	5.64195	90.0237	6.6464e-06	0.000241481
SMC2	structural maintenance of chromosomes 2	17.5775	22.1181	16.6959	5.9391	1.43536	1.11255	2.75829	6.76595	6.12811	22.3935	0.00127681	0.00440942
TMEM56	TLC domain containing 4	0.455895	0.538706	0.350076	0.0555048	0.0441636	0.0976609	2.75739	6.76171	0.978715	39.0312	0.000167539	0.00114437
TEC	tec protein tyrosine kinase	1.67471	1.47607	1.30094	0.276713	0.259572	0.114149	2.75663	6.75816	1.8006	49.8001	6.76443e-05	0.000678508
RP3-468K18.5		87.5623	93.3352	67.7749	17.3689	9.90993	9.61606	2.7558	6.75428	5.18274	92.7908	5.8819e-06	0.000227371
RAB6B	RAB6B, member RAS oncogene family	1.65388	0.990603	1.07879	0.151496	0.315739	0.0711341	2.75356	6.74381	2.10652	28.1159	0.000536424	0.00243529
LGR4	leucine rich repeat containing G protein-coupled receptor 4	3.4056	3.5159	3.98261	0.879459	0.474365	0.259136	2.75308	6.74155	3.72522	48.153	7.6813e-05	0.000721538
POLR3G	RNA polymerase III subunit G	24.3838	31.0986	14.6344	4.7243	3.05832	2.69801	2.75284	6.74044	5.76431	63.0197	2.73612e-05	0.000418757
AC068134.10		2.15861	1.16138	1.98834	0.223448	0.165939	0.375287	2.75143	6.73385	-0.221398	26.7729	0.000634088	0.00271606
SMC5	structural maintenance of chromosomes 5	14.3191	17.2951	12.4528	2.48052	2.26569	1.81199	2.74503	6.70404	5.81187	133.218	1.33891e-06	0.000140603
LCTL	lactase like	5.48237	6.81933	5.31874	1.71839	0.492486	0.448325	2.74185	6.68926	3.57839	30.7903	0.000391436	0.00197563
SLC39A6	solute carrier family 39 member 6	14.7235	22.5826	18.2079	2.38308	3.19619	2.6683	2.74168	6.68849	5.29798	105.317	3.51748e-06	0.000195406
SNX4	sorting nexin 4	15.1912	19.8954	16.5837	4.30064	2.18415	1.28571	2.74138	6.68708	4.74952	46.2193	8.96108e-05	0.000794009
TRPM7	transient receptor potential cation channel subfamily M member 7	2.67389	3.90104	1.7395	0.628183	0.400241	0.229127	2.7391	6.67656	4.31354	39.6652	0.00015795	0.00110531
NPM1P46	nucleophosmin 1 pseudogene 46	32.1928	19.2706	24.3486	4.61396	3.40126	3.19088	2.73794	6.67117	3.64312	103.13	3.83148e-06	0.000202484
RGS2	regulator of G protein signaling 2	11.8851	11.2431	4.87328	2.46418	0.93578	0.830868	2.7377	6.67005	3.50312	29.8684	0.00043524	0.00211222
AC096949.1		3.22129	3.70108	1.8484	0.877546	0.22282	0.231194	2.73628	6.66352	2.95187	24.2883	0.000879775	0.00339419
SF3B1	splicing factor 3b subunit 1	21.3039	26.2931	18.1101	4.91558	2.72535	2.29479	2.73464	6.65593	6.85523	75.8175	1.32164e-05	0.000310422
PIK3C3	phosphatidylinositol 3-kinase catalytic subunit type 3	1.28123	1.53067	0.916908	0.282212	0.150724	0.129858	2.73416	6.6537	3.45278	56.4569	4.18938e-05	0.00051928
USP24	ubiquitin specific peptidase 24	7.55331	9.87031	6.20178	1.52564	1.0469	1.00205	2.73004	6.63472	5.74472	98.5579	4.60736e-06	0.000210657
RP1-151F17.2		1.01612	0.437853	1.04473	0.185003	0.0515207	0.129466	2.72976	6.63344	0.338206	23.6598	0.000959644	0.00360243
RANBP6	RAN binding protein 6	3.07097	2.90259	2.3208	0.678746	0.242517	0.329804	2.72966	6.63298	2.87491	50.0308	6.647e-05	0.000672426
FAM95C	family with sequence similarity 95 member C	2.82858	2.30936	3.24771	0.465476	0.353532	0.426426	2.72943	6.63196	2.16553	91.903	6.11483e-06	0.000231468
TFRC	transferrin receptor	16.5648	17.1524	8.92048	2.0911	2.39983	1.92893	2.72512	6.61217	6.01721	81.417	9.94939e-06	0.000277049
PRKAA2	protein kinase AMP-activated catalytic subunit alpha 2	0.856434	0.677869	0.328561	0.213335	0.0209685	0.0491788	2.72308	6.60282	1.767	13.7603	0.00508435	0.0123517
NPM1P19	nucleophosmin 1 pseudogene 19	3.62207	1.83621	1.77739	0.329732	0.459128	0.276897	2.72233	6.59936	0.0667471	28.086	0.000538392	0.0024397
RP11-180C16.1		0.602972	0.569416	0.742977	0.125848	0.140187	0.0176138	2.72003	6.58888	0.512456	19.4222	0.00181297	0.00569575
HENMT1	HEN methyltransferase 1	2.80459	3.3412	4.08619	0.677405	0.377295	0.487595	2.71859	6.58229	2.26479	71.1081	1.70369e-05	0.000340258
ADD3	adducin 3	10.3936	12.5121	9.5354	3.13157	0.889589	0.974552	2.71756	6.57757	5.35191	34.7253	0.00025705	0.00150612
NPM1P39	nucleophosmin 1 pseudogene 39	12.7525	11.3095	12.0246	2.5386	1.50818	1.40226	2.71585	6.5698	2.594	80.7903	1.02614e-05	0.000278502
EVA1C	eva-1 homolog C	0.876062	1.03617	2.45035	0.63371	0.0150195	0.0150969	2.71405	6.5616	1.87153	5.86893	0.0401548	0.0653208
DZIP3	DAZ interacting zinc finger protein 3	2.18396	2.1424	3.07706	0.606117	0.328212	0.188517	2.71112	6.54832	3.30705	45.371	9.60459e-05	0.000829798
NBN	nibrin	10.9634	16.6077	11.0813	3.13197	1.49218	1.34508	2.71005	6.54342	5.52396	55.7084	4.41003e-05	0.000528198
NUS1P1	NUS1 pseudogene 1	4.23037	4.89155	3.07459	0.73199	0.741268	0.372545	2.70996	6.54303	1.09328	40.8283	0.000142051	0.00103512
RP11-324O2.3		0.796764	0.91757	0.845884	0.142043	0.179325	0.0636176	2.70778	6.53315	0.66443	33.772	0.000282428	0.00160156
ZNF638	zinc finger protein 638	13.4427	15.0924	14.5993	3.27951	2.07817	1.24859	2.70753	6.53204	6.68953	70.1129	1.8011e-05	0.000350257
GPAM	glycerol-3-phosphate acyltransferase, mitochondrial	1.20281	1.15635	0.838678	0.20346	0.136652	0.147407	2.70658	6.52774	2.60514	80.8031	1.02549e-05	0.000278502
PRPF40A	pre-mRNA processing factor 40 homolog A	42.8186	56.0907	46.8584	11.6603	6.4036	4.40709	2.70638	6.52681	8.06331	63.4412	2.66592e-05	0.0004122
SRPK1	SRSF protein kinase 1	36.1717	46.0327	25.9121	7.46371	4.24011	5.02795	2.70235	6.50861	7.12789	80.7475	1.02832e-05	0.000278502
FAM83A-AS1	FAM83A antisense RNA 1	1.85346	1.69852	1.05134	0.479299	0.0970747	0.121969	2.70235	6.50861	0.326739	18.4256	0.00213654	0.0064327
PLS1	plastin 1	2.94356	2.8832	2.28799	0.698454	0.31492	0.235856	2.70034	6.49957	3.05443	45.448	9.54386e-05	0.000826746
CSDE1	cold shock domain containing E1	143.411	142.951	113.865	28.2796	16.4581	17.3732	2.68936	6.45025	8.79608	120.195	2.04703e-06	0.000152144
SPTBN5	spectrin beta, non-erythrocytic 5	0.567027	0.452994	1.04279	0.0761126	0.084785	0.151802	2.68841	6.44605	2.29171	40.0752	0.000152107	0.00108024
TMOD2	tropomodulin 2	0.124963	0.168535	0.113936	0.0453963	0.00561875	0.0112955	2.68671	6.43845	-0.036139	15.2686	0.00376168	0.0098407
CAPZA1	capping actin protein of muscle Z-line subunit alpha 1	16.315	20.4812	16.313	3.96493	2.32708	1.99697	2.68438	6.42804	5.40416	85.3414	8.2395e-06	0.000263347
CASD1	CAS1 domain containing 1	0.229017	0.576675	0.177207	0.0779447	0.0620184	0.0124676	2.6834	6.42367	0.0975383	13.337	0.00553778	0.0131878
SRSF1	serine and arginine rich splicing factor 1	64.481	81.3784	54.6868	7.67042	11.2751	12.0514	2.68268	6.42047	7.01661	93.0339	5.82005e-06	0.000227177
STAG2	stromal antigen 2	33.37	38.9363	26.6604	9.46303	3.91704	2.23552	2.68156	6.4155	7.28941	32.3199	0.000353004	0.00184754
ZNF350	zinc finger protein 350	0.803896	0.698478	0.869609	0.155168	0.0936261	0.115826	2.67922	6.4051	1.08696	57.4886	3.90701e-05	0.000496315
FAM81A	family with sequence similarity 81 member A	7.03833	6.34001	5.01823	1.13113	0.80875	0.918953	2.67883	6.40338	4.30615	122.426	1.89776e-06	0.000150667
TOP2A	DNA topoisomerase II alpha	126.261	117.13	145.052	32.0633	16.251	12.3583	2.67744	6.39719	8.90249	68.4872	1.9754e-05	0.000360466
IPO11	importin 11	1.98305	2.21075	1.67439	0.381422	0.255796	0.278905	2.6756	6.38903	3.10301	93.947	5.59467e-06	0.000225458
BOD1L1	biorientation of chromosomes in cell division 1 like 1	18.1668	21.789	14.7862	4.48149	2.55377	1.60356	2.67383	6.38123	7.39076	54.5611	4.77668e-05	0.000554997
CUL3	cullin 3	6.67459	6.58519	8.15801	0.989684	1.24736	1.07101	2.67309	6.37794	5.56275	159.853	6.27367e-07	0.000107469
RP11-64B16.2		141.153	467.538	29.357	36.4539	34.3094	32.3159	2.67173	6.37192	6.11709	10.6151	0.010751	0.0223235
RBM45	RNA binding motif protein 45	0.630827	0.976981	0.648723	0.196295	0.0819981	0.0755525	2.67082	6.36793	1.10491	32.0116	0.000341441	0.00180795
GTF2B	general transcription factor IIB	17.1763	16.4083	20.0422	3.85127	2.57112	1.94936	2.66978	6.36331	4.51869	96.3629	5.04811e-06	0.00022029
RP1-27K12.4		2.40748	2.15108	1.76269	0.429194	0.179287	0.360422	2.66892	6.35953	-0.457549	25.3337	0.000764223	0.00308717
DCAF13P1	DDB1 and CUL4 associated factor 13 pseudogene 1	1.46459	0.884692	0.770265	0.132389	0.294947	0.0494112	2.66536	6.34385	-0.215256	16.5015	0.0029893	0.00827367
MFN1	mitofusin 1	6.96819	7.47293	4.65849	1.24636	0.960338	0.805328	2.66376	6.33682	4.46292	87.7697	7.36098e-06	0.000252907
STIL	STIL centriolar assembly protein	4.60578	4.57251	3.56232	1.01027	0.385589	0.621927	2.66281	6.33265	4.16679	60.5211	3.20236e-05	0.000447338
CCDC88A	coiled-coil domain containing 88A	4.403	5.47701	2.90386	1.15471	0.544195	0.343571	2.66249	6.33124	5.17423	35.6594	0.000233718	0.00141421
ALPP	alkaline phosphatase, placental	32.8344	19.5423	27.6685	10.9748	0.87629	0.966741	2.66221	6.33003	5.546	9.22942	0.0151361	0.0292497
TEFM	transcription elongation factor, mitochondrial	3.19113	2.41281	2.99067	0.673578	0.44614	0.22422	2.66014	6.32094	2.42417	46.4598	8.7883e-05	0.000786213
LANCL1	LanC like 1	4.51684	5.86006	4.55348	1.04449	0.584859	0.737971	2.65948	6.31807	3.92866	88.1643	7.22931e-06	0.000252015
EML6	EMAP like 6	0.692252	0.713684	0.474125	0.138329	0.0679812	0.091109	2.65883	6.3152	2.40616	57.236	3.97393e-05	0.000501035
TRAPPC13	trafficking protein particle complex subunit 13	1.8643	1.99844	2.00474	0.432969	0.255064	0.237733	2.65764	6.31	3.0039	81.5241	9.89725e-06	0.000277049
AC007620.3		1.65375	1.61654	1.47472	0.423335	0.18526	0.135429	2.65694	6.30694	0.876333	32.3042	0.00033065	0.00176575
KIF14	kinesin family member 14	9.4781	8.29126	6.13633	1.96394	1.02872	0.803739	2.65673	6.30602	5.06893	58.8049	3.5799e-05	0.000475674
GXYLT1	glucoside xylosyltransferase 1	4.92934	8.27466	5.67894	1.11951	1.09882	0.780153	2.65585	6.30217	4.78458	80.2228	1.05544e-05	0.000280709
CHD1	chromodomain helicase DNA binding protein 1	15.049	18.7833	10.5922	3.27849	2.41799	1.39468	2.65448	6.29621	6.49232	56.1614	4.27484e-05	0.000523162
CCDC77	coiled-coil domain containing 77	27.2682	25.3499	24.0864	6.16318	3.02115	3.00945	2.6539	6.29366	5.73817	81.7987	9.76507e-06	0.000277049
RP13-753N3.3		2.7334	1.99001	3.33553	0.758019	0.301567	0.181873	2.65271	6.28845	-0.152869	20.7807	0.00146331	0.00488819
CCDC14	coiled-coil domain containing 14	5.55766	6.64677	4.61078	1.46178	0.572352	0.664476	2.65225	6.28647	5.21864	53.0268	5.32751e-05	0.000593132
YJEFN3	YjeF N-terminal domain containing 3	40.5733	45.7185	42.8798	5.06789	7.24724	8.00641	2.65046	6.27866	6.20493	116.836	2.29999e-06	0.000160727
DHX15	DEAH-box helicase 15	28.6722	30.8865	20.4036	5.12713	3.56056	4.05799	2.65007	6.27697	6.98091	119.498	2.09656e-06	0.000153455
SEPT7P6	septin 7 pseudogene 6	2.25627	2.05886	2.53068	0.616192	0.171601	0.287476	2.64931	6.27367	0.64672	29.0605	0.000478674	0.00225315
LTV1	LTV1 ribosome biogenesis factor	161.789	197.257	170.639	40.8336	24.1767	19.8894	2.64557	6.25743	7.56323	90.4082	6.53317e-06	0.000240046
BTAF1	B-TFIID TATA-box binding protein associated factor 1	8.95571	8.85007	4.67344	1.85397	1.00458	0.754072	2.64544	6.25688	5.04744	45.8193	9.25769e-05	0.00081102
SACM1L	SAC1 like phosphatidylinositide phosphatase	2.86965	3.28089	2.63933	0.618696	0.409068	0.375423	2.64491	6.25455	3.64982	93.9417	5.59595e-06	0.000225458
RBBP8	RB binding protein 8, endonuclease	21.5613	25.0189	18.6077	5.99489	2.3116	2.22025	2.64444	6.25253	6.00612	47.0568	8.37693e-05	0.000763018
CTC-498J12.3		2.1461	2.86766	3.34435	0.527362	0.17278	0.625214	2.64014	6.23393	0.665578	26.8649	0.000626738	0.0026938
MTIF2	mitochondrial translational initiation factor 2	41.8359	43.8538	49.6616	10.9504	5.67762	5.10309	2.63852	6.22693	6.45881	81.7245	9.80057e-06	0.000277049
RP11-159D12.5		108.043	147.379	102.089	14.1159	21.7013	21.3049	2.63516	6.21242	5.62721	84.5242	8.56379e-06	0.000267553
CCDC191	coiled-coil domain containing 191	1.69692	0.591686	1.26138	0.287762	0.172604	0.0991393	2.6331	6.20359	1.86614	29.0819	0.000477457	0.00224937
RP11-159D12.6		44.3784	50.4299	26.4293	4.82642	6.5423	8.07355	2.63248	6.20092	5.15927	62.3627	2.85015e-05	0.000425818
LRRC40	leucine rich repeat containing 40	7.89571	6.2105	4.89994	2.01475	0.702765	0.364588	2.62902	6.18606	3.40956	23.5015	0.000984929	0.0036711
NMD3	NMD3 ribosome export adaptor	20.3017	22.4811	17.7296	5.86441	2.34986	1.66013	2.62836	6.18323	5.8351	38.2833	0.000180804	0.00120505
MORF4	mortality factor 4 (pseudogene)	5.2271	7.06873	6.39236	0.906679	1.00999	1.08287	2.62579	6.17223	1.83874	69.417	1.8733e-05	0.000353732
RP11-75L1.2		71.5136	45.1154	68.6872	12.5173	10.6901	6.38482	2.62469	6.16753	4.90604	80.3564	1.04845e-05	0.000280709
PON2	paraoxonase 2	8.53826	10.8948	8.40499	1.78689	1.23342	1.49629	2.6233	6.16159	4.37971	112.401	2.69565e-06	0.000166833
CASC5	kinetochore scaffold 1	3.52509	4.3558	3.12774	1.12804	0.459253	0.217988	2.62297	6.16018	4.45668	26.3343	0.000673492	0.00283387
DNA2	DNA replication helicase/nuclease 2	2.42391	2.78023	2.02441	0.801939	0.214933	0.168782	2.61968	6.14614	2.78276	23.1976	0.00102412	0.00377911
ANKS1B	ankyrin repeat and sterile alpha motif domain containing 1B	0.0992861	0.10054	0.158111	0.0212403	0	0.0356737	2.61948	6.14528	-0.279619	10.0907	0.0116182	0.0237202
OPA1	OPA1 mitochondrial dynamin like GTPase	9.15157	11.0109	10.2184	1.84803	1.7916	1.27575	2.6193	6.14453	5.63635	130.592	1.45385e-06	0.000142367
ENPP1	ectonucleotide pyrophosphatase/phosphodiesterase 1	0.165392	0.441362	0.802863	0.0919942	0.0472967	0.0871577	2.61896	6.14305	1.20913	19.7004	0.00173364	0.00551142
MAPK15	mitogen-activated protein kinase 15	0.969569	0.90909	1.09442	0.0768224	0.203242	0.193538	2.6189	6.14282	0.860127	32.6525	0.000318344	0.00172321
ATP11C	ATPase phospholipid transporting 11C	2.01495	2.95647	2.27396	0.618064	0.361897	0.204062	2.61864	6.14173	3.39098	42.6897	0.00012049	0.000938739
RASA2	RAS p21 protein activator 2	1.5519	2.19242	1.17648	0.372152	0.240006	0.191898	2.61861	6.14158	2.53896	47.811	7.89042e-05	0.000733156
CLK1	CDC like kinase 1	19.4328	27.412	5.30351	4.12095	2.37745	2.14184	2.61811	6.13946	5.72994	21.3104	0.00149269	0.00495544
LXN	latexin	5.65487	7.30185	4.10695	1.48292	0.782471	0.524337	2.61806	6.13923	2.33843	36.562	0.000212436	0.00132942
ZNF507	zinc finger protein 507	3.28568	3.42578	2.10185	0.532665	0.430475	0.470701	2.61663	6.13315	4.26983	93.0583	5.81388e-06	0.000227177
FKBP11	FKBP prolyl isomerase 11	2.16405	1.97808	1.68374	0.278247	0.362708	0.298292	2.61421	6.12289	2.49738	83.1944	9.12571e-06	0.000271191
CAPN7	calpain 7	4.21967	5.46493	4.31673	1.3525	0.478845	0.475444	2.61353	6.11999	3.9332	39.4946	0.000160463	0.00111427
EYA4	EYA transcriptional coactivator and phosphatase 4	2.7839	3.45505	1.69671	0.687187	0.371808	0.24915	2.61228	6.11468	3.80104	37.9981	0.000184748	0.00121756
FBXO3	F-box protein 3	1.76127	1.88029	1.89801	0.447997	0.199617	0.258728	2.61067	6.10788	3.74283	71.8734	1.63316e-05	0.000332588
PLK4	polo like kinase 4	9.51235	8.86754	7.89912	2.84164	0.809589	0.689133	2.60956	6.10318	4.51243	28.0675	0.000542021	0.00245004
MT-TM	tRNA	300.577	725.787	97.0394	52.6505	66.822	67.6498	2.60928	6.102	3.93123	15.8519	0.00363811	0.00960387
PCF11	PCF11 cleavage and polyadenylation factor subunit	7.25651	5.75451	3.99384	1.02922	0.808132	0.934474	2.60801	6.09664	5.03497	96.8098	4.95431e-06	0.000219003
TH2LCRR	T helper type 2 locus control region associated RNA	4.31451	5.26096	6.88469	1.24877	0.876973	0.547135	2.60653	6.09038	1.80593	46.4289	8.81027e-05	0.000787073
U2SURP	U2 snRNP associated SURP domain containing	53.4639	58.9573	57.8635	16.4548	7.03312	4.68436	2.60553	6.08614	8.5174	41.5088	0.000134457	0.00100141
CLMP	CXADR like membrane protein	3.82166	5.40573	3.76563	1.16878	0.474603	0.509284	2.60532	6.08528	3.69575	46.0271	9.10211e-05	0.000802736
SNED1	sushi, nidogen and EGF like domains 1	0.375438	0.324632	0.290403	0.0669314	0.0529119	0.0410973	2.6039	6.07927	1.41488	58.3121	3.69828e-05	0.000481575
HOXA13	homeobox A13	0.312867	0.179938	0.24882	0.0923198	0.0128549	0.0129211	2.6016	6.06959	-0.340279	12.4953	0.00663049	0.0151601
EBF3	EBF transcription factor 3	0.373874	0.558527	0.351951	0.139653	0	0.0710761	2.60149	6.06913	0.283417	9.37235	0.0139525	0.0273984
RP4-742J24.2		13.9499	15.1195	11.3876	3.25356	1.21404	2.22526	2.60086	6.06647	3.85201	55.1721	4.57695e-05	0.000539631
LRPPRC	leucine rich pentatricopeptide repeat containing	15.9102	21.4458	13.9603	4.26963	2.23738	2.03345	2.59955	6.06099	6.61043	63.5287	2.65162e-05	0.00041066
DNAJC13	DnaJ heat shock protein family (Hsp40) member C13	5.69248	6.84316	4.51555	1.44245	0.793146	0.597927	2.59768	6.05311	4.99107	56.3158	4.22991e-05	0.000520803
ATP13A3	ATPase 13A3	4.55558	5.55393	4.30225	0.954789	0.774264	0.648085	2.5976	6.05279	5.05745	118.248	2.1892e-06	0.000156212
TOPORS	TOP1 binding arginine/serine rich protein, E3 ubiquitin ligase	26.5381	20.2822	23.543	5.47108	3.10307	3.00681	2.59502	6.04198	5.79737	100.263	4.29731e-06	0.000207559
SSX2IP	SSX family member 2 interacting protein	4.23644	6.04203	3.77378	1.47427	0.408671	0.490652	2.58843	6.01443	4.57133	29.4003	0.000461915	0.00220099
ZNF841	zinc finger protein 841	1.47832	1.69255	1.11049	0.225898	0.205885	0.275928	2.58826	6.01372	1.86271	60.4578	3.21539e-05	0.000448076
ZNF107	zinc finger protein 107	1.22581	1.20479	0.950795	0.286824	0.168881	0.105521	2.58526	6.00122	2.25192	44.7573	0.000101058	0.000853014
ALMS1	ALMS1 centrosome and basal body associated protein	2.52801	2.6675	1.76018	0.691161	0.281449	0.196393	2.58416	5.99666	4.25429	33.9734	0.000276509	0.00157801
HSD17B11	hydroxysteroid 17-beta dehydrogenase 11	4.12373	4.05368	4.07108	0.759264	0.590701	0.674712	2.58365	5.99454	2.54602	100.818	4.20198e-06	0.000207559
METTL15P1	methyltransferase like 15 pseudogene 1	2.31033	1.5013	1.32634	0.336989	0.250258	0.251548	2.58334	5.99327	0.141685	32.171	0.00033551	0.00178409
RP3-368A4.5		0.499846	1.20774	0.324737	0.225913	0.0671078	0.0505904	2.58009	5.97975	0.698872	12.9698	0.00598487	0.0140086
AC002056.3		1.33566	2.53735	2.25982	0.23168	0.516156	0.259409	2.57955	5.97752	-0.0455208	21.8417	0.0012466	0.00433516
LMO7	LIM domain 7	42.2041	28.2369	35.6509	5.29036	6.13206	6.01273	2.57924	5.97626	8.19741	170.606	4.77781e-07	0.000103691
CLEC2D	C-type lectin domain family 2 member D	8.77833	5.50614	8.42818	1.59027	1.32508	0.831262	2.57815	5.97171	4.92716	81.0517	1.01298e-05	0.000278049
PGGT1B	protein geranylgeranyltransferase type I subunit beta	1.83192	2.27661	1.53888	0.440309	0.263104	0.244871	2.57754	5.96921	3.47881	67.4355	2.09925e-05	0.000367271
PAXBP1-AS1	PAXBP1 antisense RNA 1	0.501781	0.403911	0.729816	0.130556	0.0484774	0.0893335	2.57612	5.96334	0.420385	28.6109	0.000505157	0.00233574
KIF21A	kinesin family member 21A	12.4553	18.9833	11.8922	3.45181	2.37169	1.49726	2.57588	5.96236	6.42447	55.9968	4.32337e-05	0.000525068
FGFR1OP	centrosomal protein 43	2.19532	2.29626	1.87039	0.514947	0.254463	0.299127	2.57565	5.96138	4.23312	76.5905	1.26941e-05	0.000305505
RIOK2	RIO kinase 2	3.12648	4.68703	3.17082	0.682717	0.576322	0.585265	2.57461	5.95708	3.57052	84.3457	8.63672e-06	0.000267965
KIF18A	kinesin family member 18A	6.75889	5.8115	7.22291	1.94258	0.826352	0.563127	2.56842	5.93161	4.16321	39.3908	0.000162015	0.00112075
LINC01132	long intergenic non-protein coding RNA 1132	0.419521	0.155107	0.317753	0.0928431	0.017237	0.0346517	2.56817	5.93056	-0.480683	14.3813	0.00447364	0.0112061
TWF1	twinfilin actin binding protein 1	20.2764	23.8151	16.5444	5.17215	3.45023	1.65462	2.56613	5.92219	5.54185	44.067	0.000107086	0.000878767
ARHGAP11B	Rho GTPase activating protein 11B	19.6802	15.9899	21.6796	4.06449	2.37771	3.16993	2.5653	5.91877	6.66864	130.256	1.46941e-06	0.000142367
PCM1	pericentriolar material 1	9.00263	11.7954	7.42166	2.26115	1.50041	1.035	2.56489	5.9171	6.31853	62.819	2.77035e-05	0.00042021
C1orf27	odr-4 GPCR localization factor homolog	11.2624	14.8777	13.8264	3.80427	1.73362	1.26658	2.5628	5.90854	4.98954	44.3418	0.000104634	0.000868502
DCAF13	DDB1 and CUL4 associated factor 13	23.2598	25.82	17.789	3.3688	4.47758	3.38265	2.5626	5.90771	6.90785	107.082	3.28673e-06	0.000189039
PPHLN1	periphilin 1	6.9	7.57484	6.72772	1.23855	1.06232	1.26784	2.56249	5.90725	5.64973	169.811	4.87217e-07	0.000104348
ENO1P4	enolase 1 pseudogene 4	1.15274	1.68458	1.31665	0.460332	0.146509	0.0920405	2.56237	5.90679	0.592514	18.9657	0.00195309	0.0060312
ZNF239	zinc finger protein 239	1.15908	0.807667	0.70854	0.210534	0.104232	0.130962	2.56103	5.90129	0.449773	32.5072	0.000323407	0.00173985
RNF219-AS1	OBI1 antisense RNA 1	1.45759	1.21219	1.03179	0.370583	0.152479	0.104669	2.55804	5.88907	2.67321	33.0271	0.000305734	0.00168464
NR2C1	nuclear receptor subfamily 2 group C member 1	6.7485	5.8771	4.19037	1.24055	0.811114	0.800199	2.556	5.88075	4.42117	83.6135	8.94389e-06	0.000271191
AHCTF1	AT-hook containing transcription factor 1	21.6878	27.6775	20.4448	6.09584	3.37139	2.50653	2.55318	5.86926	7.03543	60.3404	3.23972e-05	0.000449556
ZEB1	zinc finger E-box binding homeobox 1	2.90528	4.40579	2.06214	0.671739	0.385476	0.554605	2.5522	5.8653	4.00163	50.4759	6.42741e-05	0.000662738
AGGF1	angiogenic factor with G-patch and FHA domains 1	14.9859	13.9059	18.8147	4.00307	2.04514	2.05569	2.55163	5.86297	5.54518	79.1019	1.11639e-05	0.000286165
PDE4D	phosphodiesterase 4D	0.687312	1.22622	1.20442	0.20542	0.124449	0.201759	2.55113	5.86091	3.31929	57.2536	3.96924e-05	0.000501035
MYH3	myosin heavy chain 3	3.58333	2.36674	2.10069	0.500518	0.391262	0.467019	2.55049	5.85835	3.39074	83.101	9.16688e-06	0.000271191
PTCD3	pentatricopeptide repeat domain 3	6.38644	7.21927	6.48628	1.46962	1.00668	0.947219	2.55044	5.85811	5.31643	122.823	1.87263e-06	0.000149736
RP3-468K18.7		47.9199	69.1486	53.9779	13.6726	8.76247	6.89676	2.54984	5.8557	5.64754	73.7505	1.47479e-05	0.000321484
HAUS6	HAUS augmin like complex subunit 6	5.49258	3.64672	4.03797	1.05442	0.659403	0.517815	2.54976	5.85536	4.34143	73.133	1.52472e-05	0.000325222
AKR1C2	aldo-keto reductase family 1 member C2	0.866241	10.6891	7.42431	0.626802	0.809532	1.83084	2.54936	5.85375	4.60917	9.73752	0.0133069	0.0263659
NUSAP1	nucleolar and spindle associated protein 1	86.1991	81.7055	99.364	24.171	10.438	11.0976	2.54855	5.85045	7.21934	66.3453	2.23786e-05	0.000379834
CASP8AP2	caspase 8 associated protein 2	10.2441	9.63214	5.99227	3.24672	0.77614	0.47452	2.54781	5.84746	5.36813	15.8082	0.00366719	0.00965715
LBH	LBH regulator of WNT signaling pathway	0.477923	0.475672	0.43851	0.148834	0.00720836	0.0797008	2.54719	5.84495	0.368359	13.0583	0.00587313	0.0138166
KIAA1715	lunapark, ER junction formation factor	1.01055	1.20748	1.19573	0.34101	0.121844	0.122472	2.54594	5.83987	2.61492	36.9438	0.000204605	0.00130041
TBC1D31	TBC1 domain family member 31	4.84282	4.92677	6.7953	0.851996	1.04019	0.900546	2.54582	5.83941	4.79196	121.505	1.95769e-06	0.000151739
TNFRSF13C	TNF receptor superfamily member 13C	0.459109	0.23204	0.679933	0.119051	0.0911737	0.0166625	2.54462	5.83453	0.143339	14.3478	0.00450364	0.0112605
HSDL2	hydroxysteroid dehydrogenase like 2	16.2944	16.9429	18.0524	4.51022	2.17617	2.11131	2.54392	5.8317	5.10895	70.578	1.75476e-05	0.000345591
TIA1	TIA1 cytotoxic granule associated RNA binding protein	2.89426	3.20562	2.3532	0.772852	0.26718	0.417756	2.54299	5.82796	3.45543	45.1381	9.79115e-05	0.00083747
CTC-534A2.2		3.39448	3.44485	3.11435	0.762044	0.482692	0.45172	2.54271	5.82681	1.95234	64.7361	2.46364e-05	0.000397824
TMEM30A	transmembrane protein 30A	8.18826	10.1314	7.71066	1.3347	1.45487	1.65479	2.54181	5.82317	4.70828	113.858	2.557e-06	0.000161999
RGPD8	RANBP2 like and GRIP domain containing 8	1.29885	1.51888	1.00641	0.29832	0.242112	0.114523	2.54131	5.82119	2.38255	41.1	0.000138624	0.00102237
NAA25	N-alpha-acetyltransferase 25, NatB auxiliary subunit	5.33643	7.14166	4.44765	1.49223	0.768187	0.674818	2.53982	5.81516	5.07434	53.7387	5.06274e-05	0.000573634
TTC3	tetratricopeptide repeat domain 3	7.34635	10.1122	10.3959	1.8458	1.75973	1.16059	2.53937	5.81336	6.43257	97.0101	4.91296e-06	0.000219003
RARS	arginyl-tRNA synthetase 1	15.1732	16.4999	19.0333	3.83447	2.63736	2.20913	2.53906	5.81212	5.07831	106.086	3.41457e-06	0.000192983
VPS4B	vacuolar protein sorting 4 homolog B	12.659	13.4449	7.40181	2.46195	1.53033	1.78951	2.53869	5.81061	4.82673	68.5956	1.96315e-05	0.000360466
SH3BP5-AS1	SH3BP5 antisense RNA 1	3.90018	5.03408	6.75884	0.81901	0.729864	1.12337	2.5384	5.80946	4.13313	75.4899	1.34456e-05	0.000310889
RP11-391L3.1		1.52822	1.51718	1.63842	0.350286	0.260132	0.174315	2.53785	5.80723	-0.415526	25.9072	0.000708758	0.00294147
OPA1-AS1	OPA1 antisense RNA 1	16.3397	20.5182	14.7927	3.24756	3.22295	2.38009	2.53704	5.80398	2.34691	67.9506	2.03743e-05	0.00036318
RP11-54O7.2		3.40618	1.4756	4.55705	0.463709	0.221376	0.890071	2.53685	5.8032	-0.200703	15.5879	0.0035401	0.00939999
ATM	ATM serine/threonine kinase	1.95711	2.10749	0.974797	0.432625	0.260734	0.182572	2.53295	5.78752	4.46831	39.4349	0.000161354	0.00111712
UBL3	ubiquitin like 3	5.56339	4.38377	2.79041	0.937149	0.566705	0.689548	2.53259	5.78611	3.45288	59.2548	3.47585e-05	0.000466418
ZNF367	zinc finger protein 367	7.20871	7.79013	6.7931	2.35832	0.681413	0.757025	2.53198	5.78366	3.96009	31.9901	0.000342249	0.00181164
SNORD118	small nucleolar RNA, C/D box 118	4.70903	9.75656	8.76946	1.97101	0.975818	0.98085	2.53014	5.77627	-0.579511	18.5531	0.00209138	0.00633681
ADAL	adenosine deaminase like	1.76568	2.32644	1.97079	0.523489	0.257266	0.270085	2.52998	5.77562	2.77462	55.2044	4.56667e-05	0.000539417
HNRNPA1P33	heterogeneous nuclear ribonucleoprotein A1 pseudogene 33	10.5144	12.4679	4.24304	2.87707	1.28196	0.585712	2.52888	5.77125	1.61762	16.9435	0.00276088	0.00780458
DHX29	DExH-box helicase 29	6.995	8.97545	5.23186	2.10147	0.849358	0.763505	2.52887	5.77119	4.30558	36.8445	0.000206606	0.0013084
TBCAP3	tubulin folding cofactor A pseudogene 3	10.2882	10.1615	12.9409	1.69305	1.88596	2.10631	2.52881	5.77094	1.06246	53.2307	5.24997e-05	0.000586908
NPM1P37	nucleophosmin 1 pseudogene 37	1.91482	1.30887	1.58584	0.436499	0.224416	0.150382	2.52789	5.76727	-0.184078	23.2738	0.00101313	0.00374618
VGLL3	vestigial like family member 3	0.420786	0.475588	0.127975	0.138491	0.0205694	0.0206755	2.52776	5.76675	1.39309	10.1639	0.0114281	0.0234291
UFL1	UFM1 specific ligase 1	13.3398	13.948	11.1522	3.21327	2.20381	1.25237	2.52661	5.76216	5.09378	58.6051	3.62732e-05	0.000478378
NPM1	nucleophosmin 1	955.804	1020.95	1204.79	233.136	160.845	155.897	2.52542	5.75741	11.2107	151.325	7.88627e-07	0.000121099
SMPDL3A	sphingomyelin phosphodiesterase acid like 3A	1.68185	0.69571	2.33454	0.349805	0.250497	0.195836	2.52407	5.75203	1.1315	26.8506	0.000627872	0.00269725
HDAC2	histone deacetylase 2	18.6125	21.2858	23.5848	5.20263	3.1398	2.70757	2.52071	5.73864	7.58056	94.892	5.37263e-06	0.000223658
ZNF845	zinc finger protein 845	2.22565	1.8516	1.39287	0.565244	0.266675	0.119133	2.52052	5.73789	2.25456	24.9699	0.000802191	0.00318859
CHN1	chimerin 1	1.61156	1.72266	1.28501	0.177104	0.230164	0.389992	2.52051	5.73786	2.18824	44.7096	0.000101461	0.000854288
AGL	amylo-alpha-1, 6-glucosidase, 4-alpha-glucanotransferase	1.97128	2.28644	1.27183	0.598475	0.174419	0.20259	2.51853	5.72998	3.20483	27.0191	0.000614644	0.00265667
RP11-773H22.4		5.20922	6.20591	4.13188	1.17632	0.413796	1.10915	2.51712	5.72438	0.591626	26.8764	0.000625828	0.00269202
TIMM17A	translocase of inner mitochondrial membrane 17A	13.8387	15.6677	15.876	2.85693	2.41941	2.60024	2.51687	5.72337	4.96291	160.524	6.16494e-07	0.000107469
RHOBTB3	Rho related BTB domain containing 3	18.2601	17.5874	10.005	3.32233	1.85044	2.86065	2.51606	5.72019	6.31186	65.1248	2.40664e-05	0.000393919
ZNF514	zinc finger protein 514	0.608061	0.422168	0.716456	0.215369	0.0431835	0.0434062	2.51604	5.72011	1.24295	17.0627	0.00270301	0.00768774
PIK3C2A	phosphatidylinositol-4-phosphate 3-kinase catalytic subunit type 2 alpha	7.28804	8.43745	4.34417	1.49218	1.35675	0.667594	2.51455	5.71418	5.18574	44.6577	0.000101902	0.000854536
RP11-114F3.4		2.51123	2.46816	0.896344	0.626768	0.199481	0.200509	2.51262	5.70654	0.656853	16.6284	0.00292143	0.00812798
FAM13A	family with sequence similarity 13 member A	1.63386	1.27127	1.49116	0.370852	0.205317	0.18897	2.51225	5.70509	3.5049	71.8148	1.63844e-05	0.000332588
STT3B	STT3 oligosaccharyltransferase complex catalytic subunit B	16.5148	18.9051	15.4442	4.71342	2.28934	1.96679	2.51097	5.70004	5.64346	58.1263	3.74416e-05	0.000485594
OTUD6B-AS1	OTUD6B antisense RNA 1 (head to head)	8.46022	9.21953	11.4176	1.55302	2.27943	1.19207	2.51094	5.69991	5.09285	74.9752	1.38157e-05	0.00031283
VTA1	vesicle trafficking 1	18.1907	18.192	15.9368	4.57044	2.43981	2.18544	2.51064	5.69871	6.2154	76.402	1.28191e-05	0.000305505
TMEM117	transmembrane protein 117	0.303064	0.532073	0.43795	0.0682469	0.0380115	0.114623	2.50955	5.69443	-0.119886	20.4636	0.00153692	0.005063
MATR3	matrin 3	27.9528	35.6227	26.6794	8.74826	4.01498	3.24287	2.50911	5.69267	7.88138	48.6379	7.3963e-05	0.00070971
PANK3	pantothenate kinase 3	8.64287	6.98793	8.06245	1.54497	1.27608	1.29819	2.50856	5.69054	5.60918	181.782	3.66095e-07	9.84906e-05
ZNF121	zinc finger protein 121	3.41663	2.94345	2.032	0.74873	0.356158	0.371589	2.50756	5.68659	3.58034	50.3289	6.49896e-05	0.000665084
SMCHD1	structural maintenance of chromosomes flexible hinge domain containing 1	5.3747	6.14339	2.84776	1.49735	0.61578	0.449416	2.50598	5.68034	5.1133	27.94	0.000550552	0.00247005
RP11-517H2.6		5.49221	5.86597	4.91401	1.3927	0.695661	0.779692	2.50588	5.67996	4.08523	72.0445	1.61789e-05	0.000331823
RP11-435D7.3		60.3168	85.1979	68.0881	25.6983	4.73064	7.80312	2.50569	5.67921	4.50273	20.9589	0.00147761	0.00491942
NEK7	NIMA related kinase 7	2.50093	2.49081	1.40629	0.781138	0.143037	0.215662	2.50479	5.67568	2.79658	18.311	0.00218492	0.00654953
RP5-1112D6.8		0.527723	0.901379	0.19552	0.197228	0.0681829	0.0228448	2.50368	5.6713	0.537697	9.97006	0.0119744	0.0243148
PLCE1-AS1	PLCE1 antisense RNA 1	0.307862	0.451404	0.858284	0.164653	0	0.113452	2.50185	5.66411	-0.33972	8.36318	0.0183051	0.0340906
CHML	CHM like Rab escort protein	4.05029	5.77236	3.02843	1.10321	0.674195	0.510398	2.50155	5.66294	4.28544	46.5389	8.73237e-05	0.000782691
CUL5	cullin 5	3.82921	5.48296	3.53062	0.844431	0.863068	0.560475	2.50003	5.65698	4.09813	68.6355	1.95866e-05	0.000360466
SMARCAD1	SWI/SNF-related, matrix-associated actin-dependent regulator of chromatin, subfamily a, containing DEAD/H box 1	3.92428	4.93399	3.51759	0.943651	0.704234	0.541309	2.49931	5.65416	3.94666	75.9265	1.31411e-05	0.000309283
GRHL1	grainyhead like transcription factor 1	0.621019	0.345258	0.5911	0.147617	0.041109	0.082642	2.49884	5.65233	1.30046	27.7643	0.00056009	0.00249496
BRCA1	BRCA1 DNA repair associated	11.0362	9.92769	6.93329	2.82213	1.23109	0.913349	2.49839	5.65056	5.60881	37.9006	0.000186482	0.00122345
CTAGE9	CTAGE family member 9	1.22248	1.56841	1.11022	0.176027	0.336143	0.168938	2.49827	5.65006	0.889031	31.9819	0.000342559	0.0018121
HSP90AA6P	heat shock protein 90 alpha family class A member 6, pseudogene	1.73681	1.22615	0.777117	0.412842	0.153294	0.0770421	2.49775	5.64805	-0.539983	13.8281	0.00500234	0.0121982
FSD2	fibronectin type III and SPRY domain containing 2	0.289631	0.275038	0.07376	0.0314295	0.0400121	0.0402184	2.49676	5.64418	-0.175916	15.2796	0.00375377	0.0098279
RP4-775C13.1		1.77685	1.90319	1.59338	0.418484	0.27193	0.234285	2.49649	5.64313	0.84915	41.525	0.000133465	0.000997487
RP11-355B11.2		2.26414	2.38099	2.16427	0.597986	0.283102	0.318039	2.49648	5.64306	1.42157	44.4395	0.00010378	0.000864937
BUB1B	BUB1 mitotic checkpoint serine/threonine kinase B	56.8809	49.7861	41.595	11.7621	5.60899	8.90467	2.49619	5.64193	7.02008	82.8457	9.28053e-06	0.000271689
ACAA2	acetyl-CoA acyltransferase 2	11.9164	11.7669	14.3645	2.89296	1.75309	2.06013	2.49613	5.6417	5.23601	118.946	2.13689e-06	0.000153904
SLC30A9	solute carrier family 30 member 9	4.53773	5.46023	4.90853	1.0723	0.954681	0.604869	2.49517	5.63794	4.40445	85.5583	8.15596e-06	0.000263347
NDUFAF7	NADH:ubiquinone oxidoreductase complex assembly factor 7	6.43236	7.11699	8.45086	1.17352	0.814785	1.88097	2.49455	5.63552	3.97718	58.3762	3.6826e-05	0.000480688
ZNF180	zinc finger protein 180	2.0879	2.14571	1.18432	0.6565	0.136692	0.178616	2.49237	5.62701	2.36632	18.8937	0.00197641	0.00607898
UBE2Q2P1	ubiquitin conjugating enzyme E2 Q2 pseudogene 1	2.74535	2.09711	1.74295	0.585362	0.32603	0.251245	2.49115	5.62225	1.97588	42.4932	0.000122566	0.000949103
PCYOX1	prenylcysteine oxidase 1	12.9885	12.9067	7.95108	1.92475	1.615	2.46299	2.48989	5.61735	5.28914	77.0167	1.24171e-05	0.000303019
RPL7P50	ribosomal protein L7 pseudogene 50	2.00009	1.52857	1.11903	0.444027	0.314758	0.0451973	2.48957	5.6161	-0.464054	13.2157	0.00568076	0.0134526
KIF15	kinesin family member 15	18.2936	18.3243	23.7114	7.73495	1.88037	1.24968	2.48779	5.60917	5.9597	17.4121	0.00276435	0.00781077
CLSPN	claspin	29.8132	39.9692	25.7152	11.9912	2.50113	2.92089	2.48646	5.60403	6.67202	19.1855	0.00206502	0.00628224
RAD50	RAD50 double strand break repair protein	26.1661	28.8142	30.9389	6.75764	5.50017	3.00976	2.48563	5.60078	7.36049	74.1539	1.44325e-05	0.000319182
ZNF518A	zinc finger protein 518A	1.33259	1.66859	1.1343	0.425736	0.129067	0.190073	2.48514	5.59887	3.15848	33.7394	0.000283402	0.00160589
RP11-355O1.11		0.44118	1.05118	0.619747	0.230467	0.0244502	0.122881	2.48289	5.59017	0.234811	12.6326	0.00643512	0.0148028
CD164	CD164 molecule	5.28094	5.24996	4.00748	1.34678	0.65934	0.605111	2.48067	5.58158	4.29164	55.9093	4.34943e-05	0.000526362
FANCD2OS	FANCD2 opposite strand	2.02688	1.58679	3.22775	0.495555	0.258759	0.450829	2.47873	5.57408	1.36786	37.7124	0.000189886	0.00123808
DNAJC2	DnaJ heat shock protein family (Hsp40) member C2	51.2759	79.9783	42.2265	17.6953	8.09777	5.85686	2.47809	5.57159	7.81873	33.5946	0.000289253	0.00162326
SMC4	structural maintenance of chromosomes 4	36.8366	49.0595	32.0121	13.7067	4.60372	3.2637	2.475	5.55968	7.62149	24.7182	0.000930114	0.00352162
PMCH	pro-melanin concentrating hormone	2.8653	1.7921	2.67481	1.03439	0.170704	0.0857923	2.47494	5.55944	0.210967	10.7597	0.00986436	0.0208781
IBTK	inhibitor of Bruton tyrosine kinase	4.9479	6.50916	6.56027	1.52753	1.05693	0.655512	2.47394	5.5556	4.95058	61.3106	3.04516e-05	0.000436322
RP11-392E22.11		2.80833	2.16181	2.08781	0.369715	0.154441	0.724439	2.4731	5.55234	-0.0873108	18.3499	0.00216394	0.00650099
NPIPB15	nuclear pore complex interacting protein family member B15	0.934925	0.652921	1.31004	0.120695	0.268895	0.115835	2.47292	5.55165	0.0340438	21.1408	0.0013849	0.00468261
AKR1C3	aldo-keto reductase family 1 member C3	1.68897	4.72381	4.86669	0.4986	0.591477	0.935292	2.47035	5.5418	3.34414	28.7149	0.000498874	0.00231872
ZNF644	zinc finger protein 644	4.89966	4.07051	3.15416	1.23112	0.58467	0.375945	2.46998	5.54037	4.18065	36.2121	0.00021994	0.0013595
MTF2	metal response element binding transcription factor 2	7.08979	5.87424	6.17509	1.60413	0.879623	0.956449	2.46937	5.53801	4.47069	88.8878	6.99531e-06	0.000247847
XPO1	exportin 1	15.2361	15.3093	10.0857	4.10064	1.79532	1.50428	2.46859	5.53504	6.54989	41.8447	0.00012974	0.000978975
ZNF23	zinc finger protein 23	0.756756	0.811841	0.715336	0.157061	0.152526	0.0992022	2.46739	5.53041	1.73656	57.7752	3.83276e-05	0.00049084
PDE8B	phosphodiesterase 8B	0.25681	0.207102	0.273366	0.0549395	0.0282459	0.0473192	2.46733	5.5302	0.0895387	30.3889	0.00040981	0.00202531
ZNF565	zinc finger protein 565	0.874485	0.950851	0.686007	0.193018	0.157123	0.0997474	2.46727	5.52995	1.01188	38.9581	0.000168691	0.00114961
TAF4B	TATA-box binding protein associated factor 4b	3.1478	2.68988	1.96591	0.576588	0.448388	0.377614	2.46695	5.52874	3.0579	70.0215	1.81039e-05	0.000350492
PSME4	proteasome activator subunit 4	5.31506	6.37029	4.25146	1.50728	0.622452	0.776462	2.46693	5.52867	5.01152	50.8588	6.24563e-05	0.000652923
TRIM24	tripartite motif containing 24	4.12584	4.58213	2.91737	1.00546	0.474948	0.634155	2.46588	5.52463	4.40629	58.4511	3.6644e-05	0.000480238
UTP20	UTP20 small subunit processome component	9.2208	13.5544	6.95561	3.24377	1.16097	1.07518	2.46543	5.52292	5.88692	29.0136	0.00048356	0.00227286
RANBP2	RAN binding protein 2	12.0695	16.2492	10.4461	3.41839	2.36498	1.28207	2.46443	5.5191	6.55985	46.7295	8.59945e-05	0.000775666
USP34	ubiquitin specific peptidase 34	5.51732	6.11312	3.78362	1.39566	0.849487	0.563806	2.4634	5.51513	5.78619	49.6033	6.86661e-05	0.00068327
P2RX5	purinergic receptor P2X 5	1.57802	1.20129	1.28003	0.644355	0.0780189	0.0156842	2.46325	5.51458	1.7599	7.23402	0.0262336	0.0459122
SKIV2L2	Mtr4 exosome RNA helicase	10.9983	12.7995	7.76864	2.66337	2.00274	1.07397	2.46319	5.51434	5.35986	47.9016	7.83435e-05	0.000730353
RP11-506H20.1		2.99293	4.0325	1.7609	0.647902	0.594362	0.341387	2.46256	5.51195	0.487061	24.0177	0.000913109	0.00348297
NCKAP1	NCK associated protein 1	3.50981	3.84754	2.71874	0.807932	0.576283	0.446478	2.46117	5.50665	5.48479	81.4045	9.95552e-06	0.000277049
TFB2M	transcription factor B2, mitochondrial	9.42715	13.8661	9.70126	1.87383	1.83969	2.27591	2.4585	5.49643	3.59971	76.7247	1.26061e-05	0.000305343
CHUK	component of inhibitor of nuclear factor kappa B kinase complex	3.20764	4.34975	2.82695	1.10133	0.396356	0.412628	2.45801	5.4946	3.8367	34.3012	0.000267192	0.00154662
DDX5	DEAD-box helicase 5	135.373	168.201	143.701	17.8386	31.7654	30.7619	2.45795	5.49435	9.33328	77.8212	1.19141e-05	0.000296066
WWP1	WW domain containing E3 ubiquitin protein ligase 1	4.67646	4.13198	4.1373	1.11623	0.639765	0.591204	2.45772	5.49348	4.01229	78.4268	1.15519e-05	0.000291234
RP11-342K6.1		0.67528	0.991572	0.724385	0.16798	0.0748481	0.188085	2.45386	5.47879	-0.174924	21.9861	0.00122024	0.00426768
CHORDC1	cysteine and histidine rich domain containing 1	11.5457	17.4542	11.1475	4.49212	1.65674	1.30139	2.45361	5.47785	6.40682	29.2554	0.000469887	0.00222401
SNX13	sorting nexin 13	1.33684	1.15465	1.18373	0.364637	0.157297	0.148101	2.45345	5.47725	3.57124	48.244	7.62682e-05	0.000719246
GNAI3	G protein subunit alpha i3	2.70576	3.25714	2.37952	0.734356	0.388564	0.408705	2.45229	5.47285	5.48585	71.6707	1.65149e-05	0.000334602
TLR6	toll like receptor 6	1.90933	1.18606	1.75244	0.389013	0.292503	0.190563	2.45212	5.4722	2.52723	53.9101	5.00141e-05	0.000569684
DIS3	DIS3 homolog, exosome endoribonuclease and 3'-5' exoribonuclease	7.98369	9.35738	5.28647	2.06385	1.28225	0.815776	2.45189	5.47131	5.60204	44.5776	0.000102586	0.000858194
USP33	ubiquitin specific peptidase 33	9.03007	9.14674	7.27359	2.54096	1.0821	1.05443	2.45123	5.46881	5.11765	49.5055	6.91811e-05	0.000686622
CUL1	cullin 1	22.0997	28.6496	22.6492	4.52434	4.39489	4.4546	2.45074	5.46696	5.68596	130.562	1.45521e-06	0.000142367
POT1	protection of telomeres 1	1.17706	0.964405	1.10366	0.298587	0.199565	0.089153	2.4503	5.46528	1.92996	34.4238	0.000263806	0.0015362
ESF1	ESF1 nucleolar pre-rRNA processing protein homolog	50.2553	60.1858	47.3794	11.0231	12.0453	5.68076	2.44945	5.46208	6.64684	63.7269	2.61958e-05	0.000410137
WNT11	Wnt family member 11	0.86842	0.163354	1.09179	0.293339	0.0272302	0.0547413	2.44857	5.45874	0.070715	7.53265	0.0232141	0.0414861
CFAP70	cilia and flagella associated protein 70	0.210529	0.290411	0.0770716	0.0079015	0.0572117	0.0398124	2.44808	5.45691	-0.127262	10.1206	0.011532	0.0235889
PAXIP1	PAX interacting protein 1	6.60061	5.39939	4.55261	1.33295	0.694953	0.998396	2.44762	5.45517	4.97268	80.4502	1.04358e-05	0.000280709
ESCO1	establishment of sister chromatid cohesion N-acetyltransferase 1	5.66033	4.66656	3.84614	1.3652	0.90874	0.316903	2.44702	5.45288	3.88574	28.6228	0.000504433	0.00233456
EXOSC9	exosome component 9	16.0267	17.5598	22.296	5.04572	2.6299	2.55977	2.44603	5.44914	5.69163	70.6298	1.74969e-05	0.000345591
GS1-293C5.1		22.2573	31.1193	22.577	3.71994	3.86754	6.29402	2.445	5.44527	2.43231	50.3682	6.47971e-05	0.000664839
ATP2B1	ATPase plasma membrane Ca2+ transporting 1	11.8839	17.9415	9.04913	3.13153	2.5999	1.45722	2.44472	5.44421	6.1991	44.6746	0.000101758	0.000854536
NPM1P27	nucleophosmin 1 pseudogene 27	102.965	111.442	122.157	27.5076	17.6447	16.5084	2.44374	5.4405	5.7799	107.777	3.20106e-06	0.000184765
IPO7	importin 7	75.2812	98.7571	59.0558	20.5565	10.6981	11.9869	2.44328	5.43876	8.38742	63.7326	2.61867e-05	0.000410137
RAB27B	RAB27B, member RAS oncogene family	1.01147	1.16102	0.381097	0.284301	0.123159	0.0663182	2.44146	5.43191	1.93823	16.7824	0.00284156	0.00798053
NAA50	N-alpha-acetyltransferase 50, NatE catalytic subunit	19.8304	21.7253	15.028	5.28924	2.50914	2.68545	2.4412	5.43095	6.16988	59.6511	3.38729e-05	0.000460905
RABGGTB	Rab geranylgeranyltransferase subunit beta	10.0359	10.8561	12.5049	2.49142	1.80228	1.82825	2.43881	5.42193	5.28013	132.853	1.35419e-06	0.000141296
AGPAT5	1-acylglycerol-3-phosphate O-acyltransferase 5	6.23208	5.52649	4.72806	0.97737	1.01196	1.0242	2.43711	5.41556	3.93136	114.841	2.46843e-06	0.000161999
RP11-277P12.6		4.42592	4.19199	1.63033	0.29405	0.851641	0.724335	2.43637	5.41277	1.06363	18.704	0.00203946	0.00622585
BZW1P2	basic leucine zipper and W2 domains 1 pseudogene 2	8.56936	6.72683	5.32581	1.63429	1.26644	0.875165	2.43456	5.40599	1.77172	46.5294	8.73908e-05	0.000782862
ALG6	ALG6 alpha-1,3-glucosyltransferase	0.648469	0.482013	0.584358	0.154141	0.0528322	0.106209	2.43301	5.40017	0.789167	30.371	0.000410652	0.00202705
HSPE1	heat shock protein family E (Hsp10) member 1	175.144	169.523	170.59	34.8235	31.0529	28.8696	2.43148	5.39448	7.64698	208.746	2.04413e-07	8.11518e-05
ZNF702P	zinc finger protein 702, pseudogene	0.477484	0.452333	0.303268	0.123071	0.041128	0.0620101	2.43099	5.39262	0.291228	22.8252	0.00107998	0.00392369
CEP70	centrosomal protein 70	9.10576	8.58522	11.5207	2.62256	1.50137	1.26379	2.43084	5.39206	4.66524	69.9867	1.81394e-05	0.000350492
GCLM	glutamate-cysteine ligase modifier subunit	3.26995	5.63234	3.18543	0.925866	0.663448	0.666869	2.43039	5.39039	3.71296	55.578	4.44991e-05	0.00053141
BCL2	BCL2 apoptosis regulator	0.30082	0.350042	0.279156	0.0598647	0.0500143	0.0614438	2.42785	5.38091	1.15365	50.4759	6.42741e-05	0.000662738
SPINK5	serine peptidase inhibitor Kazal type 5	7.62751	5.9684	26.0112	4.17987	1.91021	1.17003	2.42624	5.37491	5.07104	15.0414	0.00422776	0.0107335
NUDT12	nudix hydrolase 12	1.60634	1.40489	1.75017	0.490921	0.235452	0.152688	2.42623	5.37485	2.0301	33.9115	0.000278312	0.0015845
CUL2	cullin 2	3.10758	4.08953	3.80515	0.843838	0.749448	0.44688	2.42417	5.36719	3.49227	64.0607	2.56669e-05	0.000407988
RP11-109N23.4		4.30733	3.23576	1.77773	1.17385	0.294209	0.262868	2.42289	5.36243	0.928263	15.0528	0.00392115	0.0101475
TBC1D32	TBC1 domain family member 32	0.666828	0.274262	0.418486	0.110388	0.0709416	0.0665536	2.42286	5.36234	0.926143	30.3618	0.000411087	0.00202705
RFX7	regulatory factor X7	1.79308	1.8429	1.13261	0.396345	0.305657	0.186202	2.42245	5.36079	3.33031	48.02	7.76183e-05	0.000725526
PKN2	protein kinase N2	8.50464	9.89964	6.5749	2.83803	1.0617	0.819437	2.42057	5.35382	5.09608	30.0727	0.00042704	0.00208174
SLC7A11-AS1	SLC7A11 antisense RNA 1	1.88364	3.80373	1.1444	0.576349	0.472229	0.245332	2.41918	5.34867	3.09141	22.226	0.00117796	0.00416005
SRSF11	serine and arginine rich splicing factor 11	145.015	160.988	169.652	46.9823	20.3555	22.1047	2.41648	5.33865	9.63442	61.7245	2.96654e-05	0.000433209
NAA16	N-alpha-acetyltransferase 16, NatA auxiliary subunit	4.37692	5.32021	3.0814	1.12543	0.679763	0.59926	2.41638	5.3383	3.90248	53.188	5.26607e-05	0.000588304
LIG4	DNA ligase 4	2.39519	2.49585	2.3146	0.735828	0.357674	0.254659	2.41632	5.33807	2.6553	39.2658	0.000163909	0.00112763
OSGIN2	oxidative stress induced growth inhibitor family member 2	9.15484	12.0097	9.55874	2.02495	1.89254	1.82508	2.41463	5.33182	4.83641	116.41	2.3347e-06	0.000161999
FAM172A	family with sequence similarity 172 member A	1.50404	1.58556	1.71124	0.416668	0.296536	0.181431	2.41255	5.32413	2.28151	49.8363	6.74581e-05	0.000678508
THOC1	THO complex 1	4.86601	5.30084	4.08713	1.06127	0.810994	0.798953	2.41201	5.32214	4.51857	108.452	3.12041e-06	0.000181396
HSPE1-MOB4	HSPE1-MOB4 readthrough	350.123	362.394	360.657	73.6292	64.7554	61.9142	2.41136	5.31975	7.55845	201.051	2.39535e-07	8.86958e-05
CTD-2636A23.2		7.65813	13.8749	25.1835	2.86763	2.74925	3.05293	2.41058	5.31687	4.52248	36.7893	0.00020773	0.00131216
RP11-507J18.2		4.15138	4.30059	2.87433	0.579201	0.860261	0.648522	2.41028	5.31579	-0.425994	22.246	0.00117453	0.00415407
NDC1	NDC1 transmembrane nucleoporin	3.7453	4.62102	2.91628	0.982968	0.560217	0.588701	2.40906	5.31127	3.53249	57.9592	3.78601e-05	0.000487924
FAM98A	family with sequence similarity 98 member A	12.6667	14.4128	9.3436	2.3496	2.27189	2.21683	2.40847	5.30912	5.15526	100.108	4.32437e-06	0.000207559
RANBP17	RAN binding protein 17	0.177195	0.211098	0.20831	0.0667383	0.0178422	0.0269013	2.40577	5.29919	0.44149	21.3312	0.00134555	0.00458767
ATL2	atlastin GTPase 2	8.49346	8.86041	7.1379	1.97684	1.0977	1.55412	2.40305	5.2892	4.56915	86.1892	7.91883e-06	0.000261942
BRIX1	biogenesis of ribosomes BRX1	90.343	84.7148	78.4151	23.7826	14.1041	10.0523	2.40245	5.28701	7.97054	67.5084	2.09036e-05	0.000367271
METTL15	methyltransferase like 15	2.40208	1.99603	3.23468	0.652724	0.437098	0.337963	2.40159	5.28385	3.54898	62.8971	2.75696e-05	0.000420179
PRDX3	peroxiredoxin 3	15.1669	14.4531	17.9269	4.44014	2.00904	2.52905	2.4015	5.28354	5.002	68.4521	1.97938e-05	0.000360788
CENPU	centromere protein U	14.0381	12.1308	11.8973	4.19373	1.70479	1.32413	2.40084	5.28112	4.47404	36.9467	0.000204547	0.00130041
CEP55	centrosomal protein 55	56.5815	55.7265	53.2151	16.5795	7.40545	7.46372	2.40049	5.27981	6.74144	59.6936	3.37795e-05	0.000460592
STS	steroid sulfatase	2.38128	2.56123	1.96376	0.549031	0.225586	0.53412	2.40033	5.27925	3.16771	45.2	9.74112e-05	0.000834506
PUM2	pumilio RNA binding family member 2	10.6155	11.6864	9.01597	2.95228	1.56469	1.44562	2.3982	5.27147	5.43915	64.752	2.46127e-05	0.000397824
ANLN	anillin actin binding protein	83.0632	84.598	67.108	25.49	9.72759	9.69576	2.39816	5.27131	8.12698	42.4319	0.000123223	0.000952287
PIGK	phosphatidylinositol glycan anchor biosynthesis class K	2.36382	2.27066	2.77098	0.734586	0.308339	0.357611	2.39747	5.26878	3.01887	48.6818	7.37113e-05	0.000708264
CBX3	chromobox 3	160.804	154.549	136.768	52.2679	18.4405	15.9159	2.39635	5.2647	8.69664	33.9147	0.000279656	0.00158937
TAX1BP1	Tax1 binding protein 1	24.4328	29.6104	25.2258	8.18106	3.75943	3.24462	2.39422	5.25692	7.1715	50.3142	6.50615e-05	0.000665084
NUS1	NUS1 dehydrodolichyl diphosphate synthase subunit	6.49504	6.75218	5.2581	1.68822	0.880866	0.955678	2.39418	5.25677	4.10519	66.3973	2.231e-05	0.000379834
AC016644.1		7.45935	5.64824	2.98533	1.82568	0.677901	0.529975	2.39407	5.25638	0.533229	16.9721	0.00274685	0.00777844
EPM2AIP1	EPM2A interacting protein 1	0.698879	0.744108	0.745302	0.238352	0.064366	0.113221	2.39378	5.25531	1.83895	29.1213	0.000475222	0.00224339
HS2ST1	heparan sulfate 2-O-sulfotransferase 1	3.1058	3.1237	1.98737	0.73474	0.466433	0.367109	2.39002	5.24166	3.60683	52.3711	5.58656e-05	0.000607627
DYNC1I1	dynein cytoplasmic 1 intermediate chain 1	0.288286	0.515167	0.620033	0.0513943	0.128813	0.0863182	2.38932	5.23909	0.432319	20.6001	0.00150469	0.0049841
BZW1	basic leucine zipper and W2 domains 1	16.4747	16.7687	12.9244	3.34659	2.70495	2.73109	2.38888	5.2375	6.21092	131.567	1.40978e-06	0.000142299
RP11-92F20.1		3.4294	3.53867	5.01194	0.462144	1.12613	0.64682	2.38864	5.23663	1.3005	30.7289	0.000394183	0.00198105
MPHOSPH9	M-phase phosphoprotein 9	5.26658	5.46538	3.86287	1.62623	0.732858	0.449635	2.38776	5.23345	4.90264	31.2608	0.000371175	0.00190287
IL20RA	interleukin 20 receptor subunit alpha	0.423419	0.428422	2.21045	0.409481	0.0276447	0.138936	2.38744	5.23229	1.52419	6.82303	0.0296781	0.0507534
CCDC173	coiled-coil domain containing 173	0.57668	0.55546	0.458163	0.20999	0	0.0881712	2.38685	5.23016	-0.383641	8.14158	0.0194773	0.0358755
SPOCK2	SPARC (osteonectin), cwcv and kazal like domains proteoglycan 2	0.801882	0.611994	0.733895	0.196564	0.0945514	0.115047	2.38664	5.22938	1.50761	44.0413	0.000107319	0.000878767
RGPD5	RANBP2 like and GRIP domain containing 5	1.52321	1.54026	1.11596	0.354017	0.258291	0.185445	2.38584	5.22647	3.563	62.463	2.83237e-05	0.000425042
BRWD1	bromodomain and WD repeat domain containing 1	2.11925	1.8081	1.65162	0.401779	0.330301	0.327024	2.38548	5.2252	4.45205	124.517	1.76985e-06	0.000146979
NOL8	nucleolar protein 8	22.991	28.8707	20.9301	6.45135	4.25261	3.2834	2.38493	5.22317	6.86733	72.2434	1.60036e-05	0.000329318
RNGTT	RNA guanylyltransferase and 5'-phosphatase	3.04712	3.43732	2.61102	0.668586	0.531976	0.534719	2.38459	5.22195	3.16092	85.3876	8.22163e-06	0.000263347
CENPE	centromere protein E	10.3942	9.04672	11.4985	3.43056	1.52304	0.974203	2.38423	5.22067	5.84866	35.3283	0.000240395	0.00143751
SPDL1	spindle apparatus coiled-coil protein 1	16.3509	16.8725	16.9167	5.28931	2.23088	2.11857	2.38421	5.22059	5.56833	48.8338	7.28489e-05	0.000704971
AMT	aminomethyltransferase	0.229184	0.15927	0.246459	0.0612868	0.0227566	0.034311	2.383	5.21619	-0.354758	20.4225	0.00154678	0.00508111
DCLRE1A	DNA cross-link repair 1A	2.44531	2.4016	2.28602	0.79745	0.341112	0.228581	2.38299	5.21616	2.71253	31.3026	0.000369436	0.00189874
CD74	CD74 molecule	0.723794	0.318222	0.0567794	0.0921676	0.0924024	0.0206397	2.38247	5.21427	-0.397833	6.87539	0.0283039	0.0487671
GPBP1	GC-rich promoter binding protein 1	4.20091	4.97438	5.47963	1.25147	0.808156	0.741245	2.38233	5.21379	4.23539	82.8801	9.26512e-06	0.000271689
RALGPS2	Ral GEF with PH domain and SH3 binding motif 2	2.90554	2.60322	2.99077	0.748202	0.352615	0.5227	2.38208	5.21286	3.95021	71.8116	1.63872e-05	0.000332588
RP11-392E22.9		1.9949	1.5205	1.91999	0.493309	0.204472	0.33398	2.38145	5.2106	1.48714	40.2544	0.000149636	0.00107249
CDC5L	cell division cycle 5 like	16.8891	21.2401	16.5314	5.57408	2.92138	2.07188	2.38045	5.20698	6.12725	46.6925	8.62508e-05	0.000776926
RP11-629N8.5		2.97215	3.7224	3.59898	0.489103	0.363221	1.09528	2.37794	5.19795	-0.327348	18.258	0.00219773	0.00657462
UPF3AP1	UPF3A pseudogene 1	9.16132	7.98244	9.09816	2.58017	0.987084	1.45908	2.37791	5.19784	2.55987	45.2002	9.74099e-05	0.000834506
CENPC	centromere protein C	3.15984	2.36035	3.60676	1.06304	0.398519	0.289939	2.37689	5.19414	3.95537	28.8773	0.000489253	0.00229036
TTC3P1	tetratricopeptide repeat domain 3 pseudogene 1	0.712838	0.741729	0.510358	0.183383	0.0752604	0.118876	2.37543	5.18891	1.28559	33.8195	0.000281018	0.00159544
NUF2	NUF2 component of NDC80 kinetochore complex	12.6894	15.2437	17.6287	4.94049	2.00301	1.86674	2.37538	5.18871	4.9254	40.8913	0.000141247	0.00103308
PMS1	PMS1 homolog 1, mismatch repair system component	3.43947	3.54562	3.7	1.00191	0.51603	0.536785	2.37518	5.18799	3.53431	65.1139	2.40821e-05	0.000393919
LMBRD2	LMBR1 domain containing 2	1.75604	2.08038	0.980392	0.466974	0.263973	0.202902	2.37516	5.18792	3.02972	33.5035	0.00029057	0.00162838
CLVS1	clavesin 1	0.441606	0.521678	0.497224	0.150839	0.0928565	0.0355563	2.37504	5.18749	1.14025	23.5563	0.000973636	0.00363734
MANEA	mannosidase endo-alpha	1.3276	1.32956	1.20826	0.441296	0.163859	0.139365	2.37488	5.18693	2.01291	29.2412	0.000468512	0.00222255
ELMO3	engulfment and cell motility 3	1.40639	0.456948	2.10624	0.136759	0.444329	0.153127	2.37447	5.18546	1.04018	12.9804	0.00597127	0.0139848
UBR3	ubiquitin protein ligase E3 component n-recognin 3	2.14291	3.25448	1.69773	0.740726	0.324852	0.319997	2.37399	5.18373	3.84434	33.9313	0.000277734	0.00158342
CH507-513H4.4		2.43737	5.80742	5.05991	0.476915	1.41668	0.640794	2.37353	5.18206	1.32948	19.0099	0.00193898	0.0059956
SCG2	secretogranin II	0.221984	0.492851	1.55143	0.086344	0.192364	0.145017	2.3734	5.18162	0.345556	10.3258	0.0109611	0.0226787
SNORD3A	small nucleolar RNA, C/D box 3A	4.98465	3.69395	5.1727	0.461814	0.748267	1.41023	2.37182	5.17594	0.980814	25.746	0.000723833	0.00297394
CCDC34	coiled-coil domain containing 34	28.2878	33.3674	43.7072	9.86591	5.52567	4.94681	2.36989	5.16902	6.28264	65.0273	2.42077e-05	0.000394029
API5P1	apoptosis inhibitor 5 pseudogene 1	1.45352	1.66669	1.11744	0.291518	0.173192	0.348169	2.36961	5.168	0.418394	27.9162	0.000549711	0.00246764
ADD3-AS1	ADD3 antisense RNA 1	0.636612	0.53706	0.351255	0.182456	0.0362939	0.0766102	2.36913	5.16629	1.48021	18.9076	0.00197189	0.00607196
IGFL1P1	IGF like family member 1 pseudogene 1	12.5745	11.8935	9.29038	3.91282	0.363221	2.28184	2.36478	5.15076	1.30807	14.015	0.00481555	0.0118421
ARL11	ADP ribosylation factor like GTPase 11	0.544976	0.205025	0.346514	0.138063	0.0512649	0.0171764	2.36361	5.14657	-0.166982	11.4387	0.00840713	0.0183682
GPT	glutamic--pyruvic transaminase	0.607238	0.213469	1.51967	0.106481	0.0474454	0.286141	2.36285	5.14387	0.401812	8.48926	0.0176772	0.0331641
GFM1	G elongation factor mitochondrial 1	7.94625	11.4786	8.07651	2.72927	1.29572	1.37153	2.36247	5.14251	5.63536	51.6663	5.8825e-05	0.000627043
PDZD4	PDZ domain containing 4	2.98937	2.19101	1.0828	0.912631	0.112958	0.204372	2.36239	5.14222	2.44968	11.0822	0.00930921	0.0199366
SHPRH	SNF2 histone linker PHD RING helicase	2.01599	2.24049	1.0592	0.515808	0.270609	0.255237	2.36187	5.14036	4.23336	37.8154	0.000188013	0.00122981
ZNF721	zinc finger protein 721	4.34928	5.65201	3.84771	0.927688	0.7776	0.987297	2.36094	5.13705	4.14873	83.7456	8.88747e-06	0.000271191
ARMT1	acidic residue methyltransferase 1	16.2821	19.6988	22.9376	6.91233	2.64395	1.98153	2.35975	5.13282	5.04439	30.5696	0.000401412	0.00200484
RP11-296E7.1		0.561323	0.40897	0.855935	0.13894	0.0497479	0.161125	2.35851	5.12841	1.12943	23.3976	0.000995582	0.00369895
FAM46A	terminal nucleotidyltransferase 5A	7.47409	13.7153	6.42641	2.81196	1.32855	1.3354	2.35788	5.12618	5.07618	33.3365	0.000295776	0.00165044
PLCE1	phospholipase C epsilon 1	1.06516	0.940342	1.86658	0.472081	0.0783749	0.203301	2.35787	5.12614	3.30847	17.9917	0.0023065	0.00681978
GOLGA8UP	golgin A8 family member U, pseudogene	1.28187	0.40972	1.1503	0.200658	0.149014	0.187228	2.35782	5.12597	0.0622498	19.5474	0.00177672	0.00560878
NUP155	nucleoporin 155	6.10035	5.2179	5.14638	1.33493	0.722272	1.14238	2.35694	5.12284	4.9155	88.6527	7.07032e-06	0.000248773
CTAGE15	CTAGE family member 15	1.6862	1.42766	1.03659	0.453748	0.0379087	0.317534	2.35653	5.12137	1.13527	12.8594	0.00612787	0.0142531
TCF4	transcription factor 4	0.0824205	0.105204	0.0560355	0.0335852	0.00233825	0.0117515	2.356	5.11948	0.509237	10.5091	0.0104801	0.0218867
HERC2P2	HERC2 pseudogene 2	8.55554	7.35342	10.6507	1.99714	1.62863	1.50965	2.3531	5.1092	5.19313	123.49	1.83128e-06	0.000149736
ZFYVE16	zinc finger FYVE-type containing 16	1.1562	1.67115	1.12784	0.409684	0.239591	0.129014	2.35305	5.10904	3.19085	31.9493	0.000343792	0.00181626
RPL5P8	ribosomal protein L5 pseudogene 8	1.54849	1.28332	1.10912	0.432091	0.0802206	0.241903	2.35198	5.10525	-0.512839	14.922	0.00402186	0.0103584
RHOBTB1	Rho related BTB domain containing 1	1.26947	1.33682	1.64317	0.39403	0.14856	0.285077	2.35198	5.10525	2.04941	39.8789	0.00015487	0.00109174
AC007163.6		31.8774	29.8148	19.8926	6.45816	4.54751	4.94563	2.35068	5.10065	3.83943	72.5444	1.57426e-05	0.000326099
KPNA5	karyopherin subunit alpha 5	0.824234	0.973348	0.427539	0.239046	0.0916245	0.109365	2.34976	5.09739	2.36557	25.6579	0.000732245	0.00299767
HMGCS1	3-hydroxy-3-methylglutaryl-CoA synthase 1	9.76745	16.5021	22.7808	2.93961	2.88522	3.70374	2.34964	5.09698	5.51933	54.1237	4.92629e-05	0.00056588
MRE11A	MRE11 homolog, double strand break repair nuclease	12.3278	11.1031	10.2631	3.72123	1.50929	1.40596	2.34947	5.09637	5.68619	42.9432	0.000117875	0.000928636
BCCIP	BRCA2 and CDKN1A interacting protein	224.459	230.688	163.825	59.0446	36.7816	26.0574	2.34864	5.09344	9.11667	59.5585	3.40773e-05	0.000460905
SGO2	shugoshin 2	5.79957	5.92141	5.94914	1.5984	1.08568	0.780266	2.34525	5.0815	4.40639	72.5392	1.5747e-05	0.000326099
CERS6-AS1	CERS6 antisense RNA 1	2.35378	2.88772	2.92132	0.798303	0.334424	0.473663	2.34495	5.08041	2.81738	47.2895	8.22299e-05	0.000754485
USP1	ubiquitin specific peptidase 1	33.6328	42.4369	32.4705	14.5664	4.24823	2.90585	2.34493	5.08034	6.53129	19.0936	0.00209545	0.00634441
CTB-50L17.8		2.13851	1.72533	2.25945	0.260597	0.370926	0.551153	2.34443	5.07858	1.33415	37.4445	0.000194864	0.00125715
AC009487.6		2.01109	1.7394	1.07342	0.507674	0.287552	0.154152	2.34429	5.07812	2.72649	27.7918	0.000558198	0.00248789
DOK3	docking protein 3	0.523551	0.413556	0.412496	0.0913073	0.074588	0.0954197	2.34404	5.07723	0.43854	35.5854	0.000234213	0.00141479
ERBB3	erb-b2 receptor tyrosine kinase 3	0.589392	0.241604	2.60662	0.203369	0.181233	0.269456	2.34298	5.0735	2.54518	9.728	0.0133385	0.0264061
SSB	small RNA binding exonuclease protection factor La	116.4	171.931	156.1	40.676	23.7454	23.5337	2.34286	5.07308	8.82638	75.4731	1.34575e-05	0.000310889
KPNA3	karyopherin subunit alpha 3	24.7003	25.2622	13.8667	4.78827	4.04788	3.73826	2.34233	5.07122	5.83707	69.367	1.87863e-05	0.000353917
RB1CC1	RB1 inducible coiled-coil 1	11.0245	12.3398	10.0542	3.22557	2.05197	1.32469	2.34209	5.07037	5.6671	55.8396	4.37035e-05	0.000526905
MFSD1	major facilitator superfamily domain containing 1	1.05839	1.66884	1.1339	0.510561	0.0989105	0.161558	2.34055	5.06497	2.05393	17.5118	0.00249787	0.00725645
HLTF-AS1	HLTF antisense RNA 1	3.63599	3.70161	1.81512	0.989991	0.472625	0.316708	2.33998	5.06297	-0.283518	15.6236	0.00351635	0.00936141
CAND1	cullin associated and neddylation dissociated 1	5.22585	4.66989	3.88139	1.27872	0.718196	0.7219	2.33997	5.06293	5.22817	74.8958	1.38739e-05	0.00031283
USP9X	ubiquitin specific peptidase 9 X-linked	13.1556	13.4816	8.93656	2.99095	2.34369	1.69446	2.33852	5.05783	6.63312	72.9687	1.53835e-05	0.000325938
FANCM	FA complementation group M	1.15663	1.26214	1.04967	0.499037	0.0772081	0.116409	2.33847	5.05767	2.56442	15.0821	0.00390908	0.0101251
RINT1	RAD50 interactor 1	7.67886	7.70835	4.05593	1.86274	0.939108	1.06082	2.33794	5.05582	3.83573	41.3823	0.00013517	0.0010051
SUZ12	SUZ12 polycomb repressive complex 2 subunit	13.6191	13.6439	10.6496	3.80554	1.96229	1.7566	2.3375	5.05426	5.63069	57.7026	3.85142e-05	0.000491683
PARPBP	PARP1 binding protein	2.11618	1.99069	1.53671	0.686496	0.165344	0.27007	2.3368	5.0518	2.43213	23.9115	0.000926625	0.00351379
ZRANB2-AS1	ZRANB2 antisense RNA 1	8.34122	8.17957	7.57169	2.06364	1.2508	1.42715	2.33655	5.05092	2.23247	63.1833	2.7086e-05	0.000415924
IGFL2	IGF like family member 2	0.701148	0.646683	0.670681	0.120965	0.188647	0.0812658	2.33585	5.0485	0.0523295	24.0439	0.000909816	0.00347386
PPWD1	peptidylprolyl isomerase domain and WD repeat containing 1	30.7911	31.0403	19.2896	7.58323	4.72563	3.81043	2.33545	5.04707	5.93774	56.2461	4.25012e-05	0.000521321
C5orf30	macrophage immunometabolism regulator	1.56861	2.13438	1.78185	0.46059	0.274859	0.34995	2.33385	5.0415	1.99047	52.3667	5.58836e-05	0.000607627
CASK-AS1	CASK antisense RNA 1	1.59817	2.5386	2.16475	0.39888	0.444329	0.382817	2.33358	5.04053	-0.495489	21.0939	0.00139483	0.00470834
TMEM67	transmembrane protein 67	0.69905	0.726234	0.523953	0.159471	0.0986895	0.126974	2.33283	5.03793	1.71637	49.3027	7.02639e-05	0.000691187
RP11-54D18.4		2.89227	2.36273	2.81343	0.854457	0.525139	0.197943	2.33187	5.03458	0.729517	21.282	0.00135557	0.00461314
ESCO2	establishment of sister chromatid cohesion N-acetyltransferase 2	1.85471	2.96796	2.498	1.13733	0.172203	0.173091	2.33102	5.03162	3.55404	11.478	0.00880794	0.0191054
TBC1D15	TBC1 domain family member 15	4.81876	5.6732	4.62201	1.48389	0.834433	0.694952	2.33028	5.02903	4.63835	59.3463	3.45517e-05	0.000464687
RP11-356M20.2		1.64471	2.00109	2.11378	0.374313	0.33357	0.419113	2.32769	5.01999	-0.0558432	27.8589	0.000553601	0.00248031
UGP2	UDP-glucose pyrophosphorylase 2	12.858	12.5001	12.2055	3.8586	1.87734	1.76561	2.32575	5.01327	5.604	60.1286	3.2842e-05	0.000452642
ALOX5	arachidonate 5-lipoxygenase	2.4346	1.18295	2.10028	0.432718	0.315506	0.369988	2.3256	5.01275	2.09335	48.3785	7.54713e-05	0.000716396
DPY19L1	dpy-19 like C-mannosyltransferase 1	6.17926	7.68434	6.24889	1.6641	1.04141	1.30848	2.32553	5.0125	4.66221	90.292	6.56714e-06	0.000240291
RRM1-AS1	RRM1 antisense RNA 1	447.765	512.371	625.174	191.853	46.2005	80.9116	2.32503	5.01078	6.77041	27.5011	0.000581201	0.0025575
NARS	asparaginyl-tRNA synthetase 1	82.6814	98.517	68.4044	19.9373	15.7574	14.1752	2.32372	5.0062	7.67629	104.384	3.64737e-06	0.000199
ORC3	origin recognition complex subunit 3	5.36954	6.20198	6.01149	1.47964	1.17857	0.837272	2.32344	5.00524	3.70091	75.3215	1.35653e-05	0.000311868
DCTN6	dynactin subunit 6	14.4643	14.6454	16.2197	4.06764	2.98229	1.95428	2.32312	5.00414	4.16649	67.8569	2.04851e-05	0.00036318
ACSL4	acyl-CoA synthetase long chain family member 4	5.30315	6.18024	5.83831	1.839	0.845912	0.788808	2.32267	5.00258	4.47516	49.0802	7.1476e-05	0.00069671
KRR1	KRR1 small subunit processome component homolog	8.73925	11.1715	7.04149	2.86937	1.45065	1.11882	2.32244	5.00178	5.86339	41.0286	0.000139514	0.00102569
CYB5D1	cytochrome b5 domain containing 1	17.9639	21.2695	12.8624	4.27658	2.22587	3.96283	2.32195	5.00008	5.38073	55.9737	4.33021e-05	0.000525068
ANAPC4	anaphase promoting complex subunit 4	2.27712	2.51654	3.31304	0.759695	0.444939	0.407771	2.32179	4.99953	3.60127	60.5613	3.19411e-05	0.000446653
USP47	ubiquitin specific peptidase 47	16.6731	23.4398	22.5213	7.54563	3.07328	2.03783	2.32152	4.99858	7.12742	28.6969	0.000502225	0.00232814
PPIG	peptidylprolyl isomerase G	89.6336	108.917	122.066	36.7385	16.4647	11.2873	2.32143	4.99827	8.87936	35.7505	0.000231583	0.00140338
MYB	MYB proto-oncogene, transcription factor	2.46233	1.70176	1.77176	0.721233	0.178536	0.28713	2.32085	4.99625	2.70762	24.8391	0.000816401	0.00322851
SLC35A3	solute carrier family 35 member A3	1.05881	1.15171	0.958593	0.328935	0.193081	0.112476	2.32034	4.9945	3.2472	38.7816	0.00017151	0.00116368
ZFC3H1	zinc finger C3H1-type containing	10.3641	8.08831	6.30039	1.9119	1.90663	1.09415	2.31989	4.99294	5.57698	62.8097	2.77195e-05	0.00042021
NAE1	NEDD8 activating enzyme E1 subunit 1	9.85615	12.503	13.4681	2.8492	2.31752	1.97424	2.31945	4.99143	5.10639	100.99	4.17287e-06	0.000207559
C12orf4	chromosome 12 open reading frame 4	2.24414	2.79264	1.25063	0.713007	0.370649	0.18628	2.31916	4.99042	2.65798	21.0992	0.00139369	0.00470548
TFPI	tissue factor pathway inhibitor	4.31413	3.35383	5.97526	1.23257	0.742318	0.729316	2.31897	4.98976	4.98375	67.5391	2.08663e-05	0.00036718
RARRES2	retinoic acid receptor responder 2	0.57127	1.05489	0.345071	0.0152765	0.340343	0.0342098	2.31786	4.98594	-0.276696	5.70616	0.0413283	0.0669221
IFT74	intraflagellar transport 74	8.24153	7.72067	10.8648	2.56339	1.5322	1.25133	2.31704	4.98309	4.32568	62.4579	2.83326e-05	0.000425042
RP1-283K11.2		13.8474	13.3006	5.32282	3.51784	1.75309	1.24385	2.31545	4.97759	1.09012	18.7997	0.00200735	0.00615092
FAM229A	family with sequence similarity 229 member A	0.752178	0.907583	1.02731	0.175355	0.137884	0.219441	2.31526	4.97694	0.666397	34.4393	0.000263383	0.00153589
MAP7	microtubule associated protein 7	139.508	132.262	173.733	32.444	29.7672	26.3314	2.31438	4.9739	8.91338	166.89	5.23944e-07	0.000107469
MIER3	MIER family member 3	1.54243	1.63904	0.878362	0.468479	0.204206	0.148242	2.31258	4.9677	2.25023	24.4121	0.000865022	0.00336626
TAF1B	TATA-box binding protein associated factor, RNA polymerase I subunit B	4.34751	3.93275	3.06203	0.967615	0.675677	0.63065	2.31174	4.9648	3.21249	69.5109	1.86335e-05	0.000352671
CTR9	CTR9 homolog, Paf1/RNA polymerase II complex component	47.9352	44.8838	45.879	11.94	8.83956	7.03013	2.31071	4.96126	7.26488	114.841	2.46847e-06	0.000161999
TPP2	tripeptidyl peptidase 2	5.85518	8.24373	5.13636	1.96452	1.08934	0.8565	2.3101	4.95917	4.71155	43.7742	0.000109775	0.000887195
TINCR	TINCR ubiquitin domain containing	1.98512	1.34069	2.45654	0.635522	0.283174	0.234404	2.30873	4.95447	2.1862	30.6312	0.000398597	0.00199507
AC114812.8		1.24141	1.97191	1.72696	0.531152	0.345142	0.0991206	2.30854	4.95381	-0.480492	13.6911	0.00514503	0.0124532
AGTPBP1	ATP/GTP binding carboxypeptidase 1	4.35497	4.47352	4.03251	1.12299	0.953097	0.505617	2.30828	4.95291	3.67288	54.3812	4.83754e-05	0.000559635
RP11-513D5.5		42.2245	36.387	17.7726	9.85848	6.12936	3.46554	2.30729	4.94952	2.32432	24.6018	0.000842987	0.0033016
N4BP2	NEDD4 binding protein 2	0.825707	1.55862	0.606602	0.340159	0.179487	0.0935472	2.30676	4.9477	2.59165	18.8173	0.00200152	0.00613882
PIAS2	protein inhibitor of activated STAT 2	0.55099	0.510957	0.27162	0.0971117	0.048493	0.123732	2.30546	4.94325	2.24832	28.5356	0.000509765	0.00234754
RP11-703M24.5		2.74614	3.14693	0.919152	0.755335	0.249303	0.375883	2.30529	4.94268	0.587991	14.2496	0.00459295	0.0114206
RAB8B	RAB8B, member RAS oncogene family	3.20253	3.05474	1.74991	0.778802	0.389764	0.454963	2.3049	4.94134	3.07241	40.4384	0.000147151	0.00105747
BLOC1S6	biogenesis of lysosomal organelles complex 1 subunit 6	4.97394	6.56856	4.11359	1.25363	0.998165	0.921311	2.30482	4.94106	4.42786	72.9699	1.53825e-05	0.000325938
PGM3	phosphoglucomutase 3	3.50094	3.60933	3.36842	0.700147	0.846773	0.551001	2.30477	4.94089	3.94699	85.5064	8.17585e-06	0.000263347
STC1	stanniocalcin 1	2.41356	0.850789	0.537404	0.0848768	0.299401	0.364302	2.3047	4.94066	1.67522	11.4681	0.00835013	0.0182632
TUBD1	tubulin delta 1	1.49946	1.22689	1.1039	0.334881	0.196336	0.236818	2.30437	4.93951	1.38308	44.7904	0.00010078	0.000851269
SLC25A36	solute carrier family 25 member 36	6.27843	5.24248	3.60519	1.66391	0.683609	0.729637	2.30314	4.9353	4.81324	37.9044	0.000186413	0.00122345
RP11-463O9.9		0.491727	0.492824	0.0171442	0.0333953	0.0930012	0.0747846	2.3031	4.93516	-0.369033	5.32866	0.0470801	0.0747413
MIS18BP1	MIS18 binding protein 1	14.6746	15.8559	11.7294	5.86923	1.46974	1.36165	2.30224	4.93223	5.72802	18.9059	0.00215931	0.00648847
SLC47A1	solute carrier family 47 member 1	0.489315	0.697238	0.895657	0.354063	0.0685922	0	2.30186	4.93092	1.28509	5.322	0.0482963	0.0764187
PUS7	pseudouridine synthase 7	38.4999	42.3693	20.9847	8.88815	4.86541	7.04588	2.30044	4.92607	6.50325	48.8888	7.25395e-05	0.000702812
GOLGA6L10	golgin A6 family like 10	2.49041	2.02415	2.21109	0.566384	0.409057	0.376322	2.30037	4.92583	2.6734	74.0665	1.45001e-05	0.000319808
ZSCAN12	zinc finger and SCAN domain containing 12	1.07844	1.10633	0.520917	0.128172	0.166573	0.251148	2.29945	4.92271	1.61075	27.0337	0.000613514	0.00265378
TTF1	transcription termination factor 1	12.9368	13.5008	11.5463	3.26778	2.02342	2.41201	2.29932	4.92224	4.61499	95.1226	5.32008e-06	0.000223183
LINC00324	long intergenic non-protein coding RNA 324	0.487562	0.549451	0.144721	0.140952	0.0314024	0.0631287	2.2984	4.91913	-0.843748	9.27216	0.0143227	0.0279633
RECQL	RecQ like helicase	10.9944	10.6237	7.03428	3.27795	1.33252	1.25241	2.2983	4.91876	4.44373	34.4176	0.000263977	0.0015362
RP11-3D23.1		1.17179	1.3353	0.671442	0.272481	0.121411	0.244074	2.29723	4.91512	-0.414872	16.9654	0.00275011	0.00778633
RPS7P11	ribosomal protein S7 pseudogene 11	6.22677	5.2429	6.73576	1.30205	0.780988	1.57003	2.29682	4.91373	1.12965	38.1272	0.000182483	0.00121231
MCM6	minichromosome maintenance complex component 6	22.3319	24.057	23.1214	8.31641	2.05602	3.9178	2.29505	4.90772	5.84112	29.5016	0.000456444	0.00218347
RP11-421N8.1		7.57262	8.20809	9.81642	2.65576	1.03543	1.48681	2.29419	4.9048	1.21476	32.0839	0.000338734	0.00179654
AC093375.1		0.989931	0.541532	0.510318	0.216098	0.0722163	0.120981	2.29316	4.90128	0.225993	18.9764	0.00194966	0.00602405
MIB1	MIB E3 ubiquitin protein ligase 1	2.70168	1.84711	1.42351	0.570368	0.338857	0.304579	2.29105	4.89413	3.58734	46.6635	8.64521e-05	0.000777019
GTF3C3	general transcription factor IIIC subunit 3	7.95062	7.19932	7.15849	2.01974	1.16865	1.35504	2.2906	4.8926	4.98737	94.5065	5.46187e-06	0.000225287
ZBTB11	zinc finger and BTB domain containing 11	5.94874	6.77841	3.47384	1.4958	1.04029	0.788674	2.29048	4.89218	4.60169	45.2068	9.73563e-05	0.000834506
CD101	CD101 molecule	0.344015	0.273224	0.13381	0.0306647	0.0683175	0.0515023	2.2893	4.88819	-0.642623	13.7799	0.00505203	0.0122973
RP11-1099M24.6		8.45609	10.1655	6.35868	2.10819	1.08951	1.93718	2.28859	4.88578	5.16944	55.7855	4.38665e-05	0.000527052
RP5-1052I5.2		6.06492	5.81274	2.78408	1.55988	0.941885	0.506017	2.28779	4.88307	2.58512	24.0342	0.000911035	0.00347689
MIR222HG	miR222/221 cluster host gene	0.73883	0.680682	0.357028	0.136984	0.0352135	0.188774	2.28701	4.88045	0.0802531	13.6253	0.00521539	0.0125932
CSPP1	centrosome and spindle pole associated protein 1	11.1852	13.7122	10.7938	3.13478	2.35408	1.82444	2.28697	4.88031	5.67147	82.4086	9.47913e-06	0.000275521
LRRC58	leucine rich repeat containing 58	3.47149	3.45331	2.63069	0.950603	0.587368	0.41993	2.28669	4.87936	3.92677	50.8695	6.24064e-05	0.000652821
MOB1A	MOB kinase activator 1A	4.09398	4.41037	5.36181	1.23947	0.730954	0.857177	2.28666	4.87924	4.16163	81.2854	1.00139e-05	0.000277049
ZNF267	zinc finger protein 267	2.41298	2.22438	1.63192	0.741416	0.278739	0.2698	2.28569	4.87598	3.00374	30.3852	0.000409984	0.00202531
SMC3	structural maintenance of chromosomes 3	110.209	143.636	111.291	47.7913	17.4576	10.7684	2.28468	4.87257	8.29541	22.2706	0.00129927	0.00447202
RNF219	ORC ubiquitin ligase 1	13.1851	11.929	13.1231	4.57364	2.00086	1.28492	2.28449	4.87191	4.75502	31.9348	0.000344344	0.001818
PI3	peptidase inhibitor 3	2.18721	2.83228	4.28204	1.42408	0.45324	0	2.28359	4.86889	0.179566	6.45078	0.0323429	0.0544242
NDUFA5	NADH:ubiquinone oxidoreductase subunit A5	10.9925	11.8515	8.60404	3.01475	2.01097	1.44763	2.28265	4.8657	5.96162	61.7621	2.95954e-05	0.000433209
ZNF700	zinc finger protein 700	1.84334	1.80213	2.06078	0.901871	0.0984932	0.178202	2.28238	4.8648	1.94293	11.4836	0.00833663	0.0182396
PUS7L	pseudouridine synthase 7 like	2.00922	2.16313	1.79665	0.577014	0.40056	0.24813	2.2819	4.86318	4.07698	52.8578	5.39283e-05	0.000595517
RRM1	ribonucleotide reductase catalytic subunit M1	115.646	128.195	137.425	47.9571	11.7236	19.5562	2.28101	4.86017	8.31695	27.4405	0.000606628	0.00262958
MAP3K7	mitogen-activated protein kinase kinase kinase 7	3.95945	5.15571	3.98994	0.958308	0.98608	0.7411	2.28076	4.85935	4.25763	83.0332	9.19687e-06	0.000271191
UBA2	ubiquitin like modifier activating enzyme 2	77.736	85.2783	82.5519	20.777	13.3815	16.2689	2.28057	4.8587	7.88912	131.524	1.41169e-06	0.000142299
TMEM168	transmembrane protein 168	0.44267	0.400635	0.369335	0.0734113	0.106309	0.065758	2.28028	4.85773	1.00368	37.6811	0.000190459	0.00124054
CEP131	centrosomal protein 131	33.1353	35.4453	103.658	11.1435	11.284	12.2619	2.27923	4.8542	7.07791	30.4842	0.000407288	0.00201855
ELMOD2	ELMO domain containing 2	0.885942	0.715142	1.03665	0.208129	0.197313	0.128915	2.27905	4.85357	1.82598	50.1495	6.58756e-05	0.000668906
GNAZ	G protein subunit alpha z	1.82901	1.12353	2.56584	0.504387	0.25539	0.35939	2.27688	4.84629	2.09076	35.5839	0.000234248	0.00141479
TRMT11	tRNA methyltransferase 11 homolog	8.83231	11.397	13.3629	3.17462	1.88362	1.85669	2.27659	4.84531	4.18309	63.6685	2.62897e-05	0.000410488
THUMPD3-AS1	THUMPD3 antisense RNA 1	1.84067	1.46364	1.71903	0.486375	0.218801	0.324657	2.27647	4.84491	2.6674	51.1438	6.11439e-05	0.000644585
EBLN3	endogenous Bornavirus like nucleoprotein 3, pseudogene	2.6026	2.2435	2.13329	0.656362	0.322714	0.456156	2.27616	4.84386	3.1884	60.1626	3.27702e-05	0.000452035
MYSM1	Myb like, SWIRM and MPN domains 1	3.05416	3.55075	1.41587	0.68621	0.57787	0.397037	2.27615	4.84384	3.86492	33.6987	0.000284622	0.00161085
FN3K	fructosamine 3 kinase	0.39679	0.168825	0.357961	0.00757907	0.0590985	0.118806	2.27418	4.83723	-0.365507	8.68795	0.0167409	0.0317405
DIP2C	disco interacting protein 2 homolog C	0.442142	0.568724	1.04858	0.171354	0.099257	0.149653	2.27396	4.8365	1.8385	31.4355	0.000363979	0.001879
OTUD6B	OTU deubiquitinase 6B	25.3105	33.7857	13.7207	7.43062	4.87431	2.91653	2.27354	4.83507	5.87797	28.9588	0.000486728	0.00228262
DYNC2H1	dynein cytoplasmic 2 heavy chain 1	0.985317	1.30884	0.413446	0.324607	0.1602	0.0828133	2.27301	4.83332	2.98478	16.3122	0.00310284	0.00848964
CTAGE6	CTAGE family member 6	1.70418	2.51901	1.87163	0.416337	0.250689	0.592158	2.27248	4.83154	1.7086	32.569	0.000321244	0.00173429
MAP2K6	mitogen-activated protein kinase kinase 6	0.376254	0.549633	0.659192	0.297055	0.0213485	0.0107293	2.27207	4.83015	1.00465	5.89195	0.0392407	0.0639824
UBA6	ubiquitin like modifier activating enzyme 6	2.07348	1.70684	1.59721	0.531373	0.363158	0.212695	2.27186	4.82944	3.62813	46.7403	8.59199e-05	0.000775662
ZNF480	zinc finger protein 480	5.54264	6.56257	5.7508	2.05714	0.635412	1.03277	2.27086	4.8261	4.1226	34.7965	0.000253836	0.00149428
FSD1L	fibronectin type III and SPRY domain containing 1 like	0.491651	0.330915	0.152531	0.101019	0.0529552	0.0465747	2.27041	4.82459	0.998549	18.6743	0.00204954	0.00625076
ZDHHC17	zinc finger DHHC-type palmitoyltransferase 17	0.819939	0.895109	0.568379	0.196753	0.133731	0.141889	2.26967	4.82214	2.03976	47.5571	8.05023e-05	0.00074322
C5orf42	ciliogenesis and planar polarity effector 1	2.39103	3.30815	2.18035	1.00753	0.360439	0.288537	2.26955	4.82172	4.59531	25.0167	0.000800421	0.00318466
SEPT7	septin 7	33.9632	44.1777	40.6848	12.62	7.28074	4.85978	2.26875	4.81907	8.02669	48.6735	7.37588e-05	0.000708302
MTUS1	microtubule associated scaffold protein 1	5.72233	4.77068	4.408	1.967	0.500828	0.648414	2.26864	4.81867	5.16544	24.58	0.000848883	0.00331964
BDP1	B double prime 1, subunit of RNA polymerase III transcription initiation factor IIIB	23.8459	29.2862	9.78844	7.64803	3.61702	2.02393	2.26805	4.81673	7.31236	17.6361	0.00266129	0.00759612
RP11-484D2.2		29.6663	40.5752	26.7235	7.56959	5.85677	6.722	2.26803	4.81665	3.95258	72.4822	1.57961e-05	0.0003267
SYNCRIP	synaptotagmin binding cytoplasmic RNA interacting protein	65.129	88.1943	51.8304	19.8538	10.8966	12.2904	2.26537	4.80778	8.41268	58.296	3.70223e-05	0.000481704
STXBP3	syntaxin binding protein 3	2.53177	3.06607	2.28474	0.801481	0.377085	0.468212	2.26373	4.80233	3.23712	48.5799	7.42969e-05	0.000710977
AGAP7P	ArfGAP with GTPase domain, ankyrin repeat and PH domain 7, pseudogene	0.41246	0.507227	0.686787	0.0569276	0.095121	0.175288	2.26361	4.8019	-0.462436	15.3602	0.00369637	0.00971905
KLRC2	killer cell lectin like receptor C2	2.92838	2.63831	1.02514	0.195772	0.654234	0.504166	2.26312	4.80027	1.04208	15.0691	0.00390883	0.0101251
ZBTB20	zinc finger and BTB domain containing 20	0.185071	0.148696	0.144642	0.044196	0.0287185	0.0257738	2.26279	4.79917	1.6405	46.7429	8.59022e-05	0.000775662
AC012358.8		1.11685	1.13062	0.591052	0.266164	0.186169	0.138614	2.25932	4.78767	1.47482	29.8566	0.00043584	0.00211451
HTATSF1	HIV-1 Tat specific factor 1	109.548	150.415	170.515	33.1642	27.3319	29.0236	2.25786	4.78282	8.08436	110.5	2.89066e-06	0.000173621
DDN	dendrin	5.11529	4.09755	1.84853	1.44813	0.418542	0.464524	2.25775	4.78245	3.07315	17.187	0.00265195	0.00758226
LA16c-349E10.1		0.735736	0.784243	1.02067	0.310651	0.115349	0.092755	2.25775	4.78244	-0.351986	15.7976	0.00340329	0.00913965
LINC00997	long intergenic non-protein coding RNA 997	0.559903	0.790554	1.01348	0.0887261	0.185317	0.211109	2.25731	4.781	0.397945	20.7418	0.0014721	0.0049081
QSER1	glutamine and serine rich 1	5.25167	5.91838	3.52009	1.3981	0.943127	0.742177	2.25675	4.77912	4.97004	53.4078	5.18374e-05	0.00058228
ZMYM2	zinc finger MYM-type containing 2	2.84667	2.6977	2.28339	0.793023	0.448892	0.395711	2.25616	4.77719	4.42531	60.8346	3.13876e-05	0.000443457
NEK2	NIMA related kinase 2	35.1118	29.0728	37.8998	7.83196	6.08381	7.21931	2.25589	4.7763	5.98183	144.274	9.61879e-07	0.000126521
CCNT2	cyclin T2	2.72509	3.06653	1.44334	0.794974	0.37798	0.354601	2.25572	4.77573	3.74031	30.5179	0.00040379	0.00201102
ALG14	ALG14 UDP-N-acetylglucosaminyltransferase subunit	0.461383	0.322332	0.50359	0.0670212	0.0610836	0.136441	2.25503	4.77344	1.344	29.7459	0.000441502	0.00213335
CEP97	centrosomal protein 97	1.62313	1.48192	0.940212	0.488591	0.177997	0.185797	2.25322	4.76745	2.97173	27.3229	0.000591653	0.00258825
API5	apoptosis inhibitor 5	19.8612	27.0696	18.0423	5.02879	4.02035	4.5992	2.25273	4.76585	5.93638	88.2213	7.21055e-06	0.000252015
SLC25A24	solute carrier family 25 member 24	4.93566	5.7103	3.88831	1.45207	0.758837	0.853076	2.25188	4.76302	4.26939	55.3019	4.53584e-05	0.000538511
HAUS3	HAUS augmin like complex subunit 3	2.85727	3.32996	3.22756	1.09212	0.305297	0.590495	2.25129	4.76109	3.74941	31.4768	0.000362303	0.00187291
ZNF860	zinc finger protein 860	1.56388	1.3222	0.978818	0.404713	0.240441	0.16112	2.25101	4.76017	1.37844	29.4717	0.00045593	0.00218205
KIAA0196	WASH complex subunit 5	5.48246	6.59291	4.57885	1.34953	0.956644	1.20197	2.24669	4.74594	4.01528	76.3183	1.28751e-05	0.000305939
DUSP13	dual specificity phosphatase 13	0.30341	0.736825	0.961217	0.0249648	0.139047	0.251575	2.2432	4.73445	0.012166	8.64686	0.0169294	0.0320344
TLR4	toll like receptor 4	0.49588	1.01983	0.676456	0.0279168	0.211464	0.218806	2.2431	4.73414	1.26501	11.0828	0.00913503	0.0196577
ZNF432	zinc finger protein 432	1.12766	0.906536	0.850816	0.235358	0.218479	0.148234	2.24258	4.73244	1.82042	49.5219	6.90942e-05	0.000686178
PSMC2	proteasome 26S subunit, ATPase 2	44.0452	49.7565	33.6993	13.263	6.64331	7.21623	2.24177	4.72978	6.51221	55.8642	4.36296e-05	0.000526905
RP11-4K16.2		10.1954	7.55087	9.04923	2.30508	2.2009	1.08444	2.24092	4.727	3.03416	47.1411	8.3207e-05	0.000759597
ZNF84	zinc finger protein 84	3.03171	3.05215	2.08891	0.869288	0.539109	0.324443	2.23971	4.72301	3.97934	38.0039	0.000184646	0.00121756
OSBPL9	oxysterol binding protein like 9	18.9537	18.2728	19.3701	6.22177	3.03797	2.73619	2.23947	4.72223	6.7598	56.252	4.2484e-05	0.000521321
HEATR5B	HEAT repeat containing 5B	1.24371	1.36617	0.859206	0.314704	0.215118	0.204214	2.23912	4.72108	2.54135	48.9609	7.21365e-05	0.000700159
ZNF680	zinc finger protein 680	0.697422	0.643625	0.571765	0.189127	0.198972	0.0117646	2.23786	4.71695	1.14693	10.0602	0.011707	0.0238617
OTUD3	OTU deubiquitinase 3	1.78388	1.98512	1.25564	0.372953	0.367139	0.320476	2.23764	4.71624	2.79579	58.5837	3.63245e-05	0.000478378
CCT6A	chaperonin containing TCP1 subunit 6A	73.6341	113.554	100.882	28.7368	15.2765	17.4695	2.23605	4.71107	7.82984	62.7027	2.79042e-05	0.000420553
APOE	apolipoprotein E	1.38992	1.28291	3.218	0.428607	0.447603	0.344931	2.23585	4.71041	1.39796	26.5893	0.000649089	0.00276143
RP11-562A8.5		20.0453	24.1007	17.2467	6.62018	4.40268	1.99142	2.23555	4.70941	1.90709	26.4442	0.000661248	0.00279899
KIAA0196-AS1	WASHC5 antisense RNA 1	1.91626	2.89539	1.64257	0.799895	0.222759	0.335862	2.23386	4.70389	-0.270428	14.2464	0.00459592	0.0114242
RSRP1	arginine and serine rich protein 1	9.66523	9.63625	6.50977	1.5829	1.8065	2.06693	2.23093	4.69435	5.15254	77.9566	1.18319e-05	0.000294929
MTFR2	mitochondrial fission regulator 2	4.36724	5.48299	2.27519	1.29363	0.720512	0.590111	2.22934	4.6892	2.61107	26.3952	0.000665412	0.00280957
KIF23	kinesin family member 23	21.8811	21.9417	19.3581	6.03306	3.14237	4.30247	2.22925	4.68891	6.34556	81.6573	9.83283e-06	0.000277049
CCAR1	cell division cycle and apoptosis regulator 1	51.5016	80.1009	58.8098	21.4902	10.4237	9.15959	2.22832	4.68589	7.87283	41.9833	0.000128164	0.000974367
HNRNPH2	heterogeneous nuclear ribonucleoprotein H2	52.8094	58.5174	49.5677	14.112	10.9408	9.20865	2.22786	4.6844	6.17639	103.722	3.74321e-06	0.000201207
RNU6-6P	RNA, U6 small nuclear 6, pseudogene	8.20493	9.77479	10.1375	2.19411	1.83308	1.84253	2.22711	4.68196	-0.580921	20.7017	0.00148124	0.00492677
RP3-368A4.6		0.387146	0.514437	0.0327066	0.127419	0.0532264	0.0178336	2.227	4.6816	-0.387055	5.24811	0.0484348	0.0765783
RPS7P10	ribosomal protein S7 pseudogene 10	3.00286	2.38494	2.99811	0.292002	0.162636	1.3078	2.22648	4.6799	0.110873	10.2132	0.0112699	0.0231791
VPS54	VPS54 subunit of GARP complex	4.03634	4.82788	4.20212	1.61977	0.629269	0.561518	2.22553	4.67683	3.75571	31.7596	0.000351081	0.00184263
SLC35D1	solute carrier family 35 member D1	0.88156	0.975972	0.841046	0.238122	0.185678	0.149308	2.22533	4.67619	1.77484	50.3342	6.49636e-05	0.000665084
RPAP3	RNA polymerase II associated protein 3	22.4998	35.0473	21.6421	8.24049	4.74462	4.12181	2.22472	4.67422	6.44014	46.8232	8.53502e-05	0.000773053
SHCBP1	SHC binding and spindle associated 1	7.96784	10.218	8.57506	2.63911	1.48091	1.62118	2.22412	4.67224	4.59804	67.298	2.11614e-05	0.000368067
HSPD1P1	heat shock protein family D (Hsp60) member 1 pseudogene 1	5.51566	7.23376	5.88304	1.64923	0.984864	1.35165	2.22382	4.67129	2.71707	56.9237	4.05863e-05	0.000507781
SPPL2A	signal peptide peptidase like 2A	1.47552	2.07087	1.6279	0.353134	0.425483	0.322775	2.22312	4.66903	3.10575	62.2089	2.87767e-05	0.000427761
RIF1	replication timing regulatory factor 1	4.48545	5.76287	2.73511	1.6526	0.728802	0.444962	2.22123	4.66291	5.58838	21.6721	0.00128834	0.00443816
AC022007.5		0.920645	0.490331	1.32039	0.20854	0.154867	0.207554	2.21967	4.65787	0.530252	22.9667	0.00105833	0.00386762
PHTF1	putative homeodomain transcription factor 1	3.69629	5.67989	4.17295	1.00686	0.8617	1.04487	2.21696	4.64913	4.30858	72.3741	1.58895e-05	0.0003278
MCM8	minichromosome maintenance 8 homologous recombination repair factor	13.5268	11.2872	11.0949	3.68592	2.20171	1.81574	2.21629	4.64696	5.79898	67.4525	2.09717e-05	0.000367271
TRIM10	tripartite motif containing 10	0.889749	0.654427	3.70477	0.769654	0.15672	0.185327	2.21527	4.6437	1.90542	7.8782	0.0214698	0.0388984
MLLT3	MLLT3 super elongation complex subunit	1.51199	1.28663	1.72357	0.483748	0.225198	0.258696	2.21502	4.64287	2.89652	47.1809	8.2944e-05	0.000758139
AC006978.6		2.66793	1.3773	2.46615	0.71344	0.238419	0.426042	2.21432	4.64063	0.741552	21.4541	0.00132087	0.00452259
CTD-2031P19.5		2.44404	6.1514	1.02075	1.28873	0.369146	0.453505	2.21401	4.63962	0.714409	8.73197	0.0165419	0.0314377
GPSM2	G protein signaling modulator 2	5.83663	4.50375	6.48826	1.32618	1.10594	1.14816	2.21303	4.63648	4.77601	116.163	2.35517e-06	0.000161999
CDC7	cell division cycle 7	5.0906	6.0554	5.74326	2.22757	0.882269	0.554262	2.21246	4.63463	3.6101	24.0368	0.000910717	0.00347649
ODF2L	outer dense fiber of sperm tails 2 like	4.04052	4.19877	4.48453	1.54836	0.614923	0.593973	2.21084	4.62943	4.80941	38.0359	0.000184081	0.00121593
GOLGA6L17P	golgin A6 family like 17, pseudogene	2.22878	1.89658	2.48663	0.47302	0.56907	0.360151	2.20989	4.62641	1.08887	39.0048	0.000167954	0.00114624
LRRC39	leucine rich repeat containing 39	1.2815	1.88785	1.45282	0.383225	0.361214	0.247553	2.20954	4.62529	0.949055	32.5439	0.000322121	0.00173557
MT-TQ	tRNA	312.838	707.255	85.371	72.9578	84.4489	85.7971	2.20863	4.62235	4.05285	11.318	0.00913305	0.019656
PIKFYVE	phosphoinositide kinase, FYVE-type zinc finger containing	1.36264	1.67164	0.8039	0.352197	0.253504	0.22751	2.20827	4.62119	3.09375	39.6224	0.000158576	0.00110779
FAM208B	transcription activation suppressor family member 2	3.60463	5.23071	1.93542	1.10584	0.686011	0.566629	2.20812	4.62073	4.59953	28.8593	0.00049031	0.00229332
C2-AS1	C2 antisense RNA 1	2.08825	1.80151	1.46305	0.539168	0.171601	0.431214	2.20671	4.6162	-0.171852	17.6574	0.00243556	0.00710712
NEK11	NIMA related kinase 11	0.230548	0.268556	0.270081	0.0657617	0.0488365	0.0490883	2.2067	4.61617	-0.160092	24.4115	0.000865091	0.00336626
ZNF483	zinc finger protein 483	0.411194	0.39873	0.273059	0.153431	0.0341825	0.0458117	2.20596	4.6138	0.402178	14.2194	0.00462087	0.0114673
PHF6	PHD finger protein 6	4.08996	4.44437	2.61616	1.26303	0.644337	0.524686	2.20564	4.61279	4.18806	35.549	0.000235077	0.00141664
RMRP	RNA component of mitochondrial RNA processing endoribonuclease	3.27585	5.24415	4.04744	2.19001	0.487909	0	2.20511	4.61111	-0.426572	5.88231	0.0389463	0.0635709
CMPK1	cytidine/uridine monophosphate kinase 1	26.329	31.273	28.6808	8.60383	5.10248	5.02622	2.20493	4.61053	6.0714	78.6547	1.14191e-05	0.000289966
FANCD2	FA complementation group D2	4.81377	4.93505	6.51315	1.91951	0.710141	0.902059	2.20365	4.60643	4.78162	39.249	0.000164167	0.00112763
ANP32E	acidic nuclear phosphoprotein 32 family member E	153.462	204.176	171.709	55.021	31.094	29.3493	2.20346	4.60583	8.5983	66.6422	2.19902e-05	0.000375981
SUGT1	SGT1 homolog, MIS12 kinetochore complex assembly cochaperone	3.22639	4.10125	4.06215	1.29028	0.658041	0.533064	2.20315	4.60483	5.12515	45.3387	9.6302e-05	0.000831067
WBP4	WW domain binding protein 4	18.984	22.4542	22.2278	6.3436	4.48661	2.96891	2.20311	4.60471	5.08167	60.3815	3.23118e-05	0.000449137
UGGT2	UDP-glucose glycoprotein glucosyltransferase 2	2.18467	2.50197	2.93847	0.570301	0.600419	0.467237	2.20301	4.60438	3.70689	83.4207	9.02696e-06	0.000271191
TTC3-AS1	TTC3 antisense RNA 1	4.3016	6.16744	7.66321	1.44457	1.51977	0.928544	2.20297	4.60426	2.02957	38.8733	0.000170038	0.0011561
RP11-230F18.5		0.326416	0.213878	0.555657	0.0349151	0.155574	0.039094	2.20155	4.59975	-0.317977	9.83283	0.0123961	0.0249403
UTP14C	UTP14C small subunit processome component	6.99154	7.70263	4.29975	2.05938	1.24161	0.849839	2.20136	4.59914	4.42168	35.841	0.000228259	0.00139252
IPO7P1	importin 7 pseudogene 1	7.59214	10.8948	6.91686	2.39937	0.822388	2.32489	2.20091	4.59768	1.74569	24.3425	0.000873274	0.00338274
NSRP1P1	nuclear speckle splicing regulatory protein 1 pseudogene 1	0.631999	0.463336	0.622908	0.208006	0.115853	0.0388169	2.19942	4.59294	-0.6229	12.8487	0.00614196	0.0142786
IPO5	importin 5	29.9231	39.1227	28.0747	8.87576	5.0534	7.3151	2.19872	4.59071	7.5791	74.4184	1.42302e-05	0.000315566
RAD54B	RAD54 homolog B	4.15685	4.53387	4.16264	1.30906	0.818324	0.66793	2.19862	4.59039	3.79624	60.696	3.16669e-05	0.00044473
SLC16A10	solute carrier family 16 member 10	0.0927773	0.098894	0.0911678	0.0313388	0.00581826	0.0233931	2.19699	4.5852	-0.503159	13.3932	0.00547298	0.0130659
RP11-321N4.5		95.0869	142.05	96.8521	32.2281	19.9663	21.0924	2.19673	4.5844	5.83163	62.9574	2.74669e-05	0.000419006
KIAA1524	cellular inhibitor of PP2A	17.2017	24.7471	22.3663	9.58124	2.31307	2.36805	2.19669	4.58427	5.90435	17.3632	0.00278747	0.00785873
CCDC66	coiled-coil domain containing 66	2.54606	2.81452	1.94435	1.05452	0.27515	0.28366	2.19655	4.58381	3.78807	19.2142	0.00188131	0.00586293
SEC63P1	SEC63 homolog, protein translocation regulator pseudogene 1	2.74788	3.58542	4.14361	1.25969	0.545698	0.470153	2.19647	4.58357	1.44792	25.6694	0.000731135	0.00299539
PDSS1	decaprenyl diphosphate synthase subunit 1	3.08734	4.07929	3.776	0.900649	0.70229	0.77314	2.19532	4.57992	2.13871	57.572	3.88522e-05	0.000494834
RGPD4	RANBP2 like and GRIP domain containing 4	0.361518	0.305071	0.242636	0.0751915	0.0957245	0.0240545	2.19265	4.57143	0.097124	15.8473	0.00337185	0.00906717
SETX	senataxin	4.69608	5.7292	2.68548	1.52532	0.74589	0.630644	2.19172	4.56849	5.02617	29.6784	0.000445001	0.00214362
ANKRD13C	ankyrin repeat domain 13C	5.49302	5.88249	5.33767	1.43697	1.00311	1.20851	2.18965	4.56196	3.96656	93.3966	5.72922e-06	0.000226112
FASTKD3	FAST kinase domains 3	3.47622	3.43204	3.14282	0.944994	0.44624	0.805073	2.18935	4.561	2.55575	47.2127	8.27336e-05	0.000757509
ITSN1	intersectin 1	9.41462	12.4783	13.8421	3.95636	1.67748	2.23458	2.18878	4.55921	7.30008	49.244	7.05812e-05	0.000692496
SERINC1	serine incorporator 1	17.2115	21.609	20.9197	6.70743	3.48053	2.96428	2.18779	4.55606	5.25163	49.2236	7.06918e-05	0.000693163
GDAP1	ganglioside induced differentiation associated protein 1	2.16665	4.82362	1.68055	1.55711	0.0645408	0.348696	2.18649	4.55196	2.87017	5.99399	0.038542	0.062993
NASP	nuclear autoantigenic sperm protein	123.34	151.74	140.92	46.023	21.0256	24.9644	2.18403	4.54421	9.45495	58.231	3.7182e-05	0.000483395
RP11-258C19.7		1.37327	1.45624	2.66836	0.710248	0.179812	0.307257	2.1839	4.54381	1.05292	17.1023	0.00268412	0.00765407
TARBP1	TAR (HIV-1) RNA binding protein 1	2.09405	2.35119	3.18704	0.746635	0.455962	0.4668	2.18335	4.54206	3.58522	59.5515	3.40929e-05	0.000460905
IDH1	isocitrate dehydrogenase (NADP(+)) 1	16.0509	17.9034	28.2801	3.0521	4.65317	5.75597	2.18065	4.53358	5.89069	47.763	7.92032e-05	0.000735117
ALMS1-IT1	ALMS1 intronic transcript 1	1.77085	2.24929	2.21656	0.668541	0.418902	0.280708	2.18015	4.532	1.44915	31.6611	0.000354943	0.00185311
MIR302B	microRNA 302b	37.1141	45.7413	50.5309	15.0347	8.56467	5.83866	2.17951	4.52999	4.38661	41.5042	0.000133712	0.000998363
RDX	radixin	69.2831	70.8626	64.7596	22.6062	12.8736	9.82464	2.17941	4.52968	8.0987	57.8208	3.82112e-05	0.000490121
COBL	cordon-bleu WH2 repeat protein	1.99804	1.68103	2.69203	0.744442	0.293888	0.361812	2.17919	4.52899	4.20668	38.5161	0.000175862	0.00118316
MAL2	mal, T cell differentiation protein 2	10.4382	7.34686	8.44194	2.34427	2.34452	1.02503	2.17878	4.52771	4.18643	42.3609	0.000123989	0.000954687
SGK1	serum/glucocorticoid regulated kinase 1	4.28332	5.6066	10.4608	1.13954	0.938951	2.34797	2.17846	4.52669	5.35898	25.416	0.000759069	0.00307194
PPFIA4	PTPRF interacting protein alpha 4	1.57992	0.0942789	0.176931	0.117905	0.127971	0.148941	2.17759	4.52398	1.86181	5.59525	0.043992	0.0705754
SPAST	spastin	2.13145	2.50792	1.75133	0.551683	0.564376	0.289946	2.17731	4.5231	2.77666	40.8243	0.000142101	0.00103512
VPS13A	vacuolar protein sorting 13 homolog A	2.03631	2.14919	1.67543	0.626272	0.386853	0.284721	2.17637	4.52016	4.59303	51.6423	5.8929e-05	0.00062774
LARP7	La ribonucleoprotein 7, transcriptional regulator	35.6665	35.7584	38.6987	13.692	6.0608	4.69982	2.17566	4.51794	6.51007	37.1672	0.000200187	0.00128161
CD55	CD55 molecule (Cromer blood group)	89.874	85.7556	105.047	16.5968	21.3353	23.2275	2.17542	4.51717	8.30412	114.457	2.50257e-06	0.000161999
RP11-513I15.6		5.44268	5.25349	5.85385	1.32442	1.0493	1.26089	2.17451	4.51433	4.79869	125.78	1.69766e-06	0.000146979
SLC2A11	solute carrier family 2 member 11	1.21283	1.0037	1.36928	0.386221	0.209598	0.192198	2.1738	4.51212	2.69964	46.3058	8.89845e-05	0.000791908
ARL6IP1	ADP ribosylation factor like GTPase 6 interacting protein 1	45.3362	43.82	48.5251	13.1201	6.93747	10.3702	2.17333	4.51062	6.67634	86.4045	7.83989e-06	0.000260428
URI1	URI1 prefoldin like chaperone	19.435	20.8069	25.3218	3.36573	5.9097	5.03886	2.16916	4.49762	6.1743	66.4832	2.21972e-05	0.000378328
TPM2	tropomyosin 2	14.1074	11.549	26.3041	3.41538	3.73184	4.16516	2.16797	4.49391	5.40196	50.179	6.57285e-05	0.000668247
HIPK3	homeodomain interacting protein kinase 3	2.90624	3.77444	1.96506	0.774402	0.620278	0.536768	2.1663	4.4887	3.82417	47.5758	8.03832e-05	0.000743187
GNL3	G protein nucleolar 3	46.8003	57.2224	56.3843	18.6973	8.92618	8.26908	2.16628	4.48865	6.75933	48.3529	7.56218e-05	0.000717306
NCAPG2	non-SMC condensin II complex subunit G2	17.6751	17.3665	14.3971	6.22367	2.09107	2.78836	2.16537	4.48583	6.13583	34.8043	0.000253631	0.00149398
ELAVL2	ELAV like RNA binding protein 2	0.491058	0.82665	0.65655	0.171281	0.101758	0.16621	2.16441	4.48282	1.09437	29.8007	0.000438687	0.00212326
CALU	calumenin	68.2645	67.7534	45.1001	8.90669	14.4968	16.527	2.16424	4.48229	7.38876	51.4388	5.98212e-05	0.000634916
CYCSP6	CYCS pseudogene 6	6.08662	3.46325	3.79131	1.16607	1.29894	0.435212	2.16375	4.4808	-0.184475	15.6326	0.00351036	0.00935463
SMAD9	SMAD family member 9	0.762223	0.616796	0.810793	0.153833	0.165649	0.160761	2.16361	4.48036	1.37779	48.3178	7.58292e-05	0.000717603
WRB	guided entry of tail-anchored proteins factor 1	2.53719	2.15231	3.51835	0.448799	0.735199	0.608928	2.16277	4.47774	3.21241	50.5557	6.38899e-05	0.000661117
COG6	component of oligomeric golgi complex 6	1.72769	1.81062	2.00224	0.55769	0.430397	0.240796	2.16264	4.47734	3.1883	45.3177	9.64692e-05	0.00083114
TSSK3	testis specific serine kinase 3	0.70122	0.880138	0.907642	0.174121	0.149201	0.224955	2.16239	4.47656	0.228033	26.0683	0.000694081	0.00289532
SLC35A1	solute carrier family 35 member A1	0.949363	0.93431	0.967092	0.26491	0.229518	0.131829	2.16233	4.47636	0.283549	25.1285	0.000785365	0.0031432
RP11-791G16.4		1.66602	1.80435	0.950503	0.462873	0.36093	0.155482	2.16075	4.47146	0.272492	16.7193	0.00287394	0.00803878
METAP2	methionyl aminopeptidase 2	202.401	233.9	190.393	73.6627	35.7616	31.7244	2.15966	4.46811	9.16505	48.0392	7.75012e-05	0.000725409
NCLP1	nucleolin pseudogene 1	1.78895	0.899114	0.675376	0.373741	0.199836	0.167389	2.15926	4.46686	0.488023	16.8892	0.00278776	0.00785873
RBM39	RNA binding motif protein 39	65.0016	70.4627	64.4232	19.295	13.8983	11.5439	2.15669	4.45891	8.58183	99.7308	4.39124e-06	0.000207559
PDCL3P4	PDCL3 pseudogene 4	4.03907	2.31515	2.762	0.448344	0.817248	0.730188	2.15667	4.45886	0.47809	23.3349	0.00100443	0.003725
SH3BP5	SH3 domain binding protein 5	7.47394	10.2949	14.504	2.05331	2.04361	3.05752	2.15603	4.45686	4.77099	50.2936	6.51628e-05	0.000665084
VWDE	von Willebrand factor D and EGF domains	1.01878	0.896431	1.37887	0.321044	0.211553	0.197455	2.15568	4.45577	2.13263	47.1754	8.29801e-05	0.000758139
FSBP	fibrinogen silencer binding protein	5.98367	6.28626	6.00347	1.85373	1.22253	1.01198	2.1552	4.45431	3.57208	63.3666	2.67818e-05	0.000413121
KCTD3	potassium channel tetramerization domain containing 3	21.0565	19.9993	20.1729	7.63869	3.13701	3.01986	2.15495	4.45352	5.93943	39.7338	0.000156953	0.0011026
KB-431C1.5		13.9287	12.4795	14.8758	3.61184	2.90323	2.66544	2.15428	4.45147	3.58867	91.6869	6.17323e-06	0.000232059
YTHDC2	YTH domain containing 2	2.31586	2.6955	2.15898	0.770554	0.483579	0.358478	2.15402	4.45065	3.99015	49.9386	6.69364e-05	0.000675385
STRN	striatin	6.48977	8.48738	3.589	2.06777	1.05767	1.09463	2.15401	4.45062	4.99697	30.7702	0.000392332	0.00197696
RP11-186N15.3		1.02745	1.02871	1.44052	0.303984	0.23443	0.235638	2.15289	4.44718	0.88134	35.7245	0.00023095	0.00140163
PLCL2	phospholipase C like 2	0.405184	0.749469	0.585522	0.239514	0.0762299	0.0766229	2.15244	4.4458	0.921707	16.3684	0.00306263	0.00841197
KIAA0895	KIAA0895	1.7616	1.79745	1.43758	0.497245	0.32068	0.302798	2.15226	4.44525	2.78988	55.4444	4.49124e-05	0.000534776
RLF	RLF zinc finger	3.43929	3.02459	1.93926	1.02425	0.523373	0.347208	2.1519	4.44413	3.42808	27.5375	0.000576043	0.00254237
IPMK	inositol polyphosphate multikinase	1.6641	2.12638	0.943281	0.650755	0.234527	0.192875	2.15188	4.44407	2.59126	17.7836	0.00238305	0.00699656
NRAS	NRAS proto-oncogene, GTPase	7.65892	7.6991	5.24871	2.22289	0.940505	1.49189	2.15173	4.44359	4.23098	42.3607	0.000123991	0.000954687
OSTM1	osteoclastogenesis associated transmembrane protein 1	0.839801	1.85365	0.848759	0.440881	0.171891	0.197459	2.14912	4.43559	1.98499	18.8175	0.00200144	0.00613882
CTB-129P6.7		0.259933	0.280453	0.199293	0.141642	0.0116875	0.0117478	2.14895	4.43504	-0.141974	6.64212	0.0304395	0.0517833
AC073254.1		0.633404	0.447492	0.752263	0.149685	0.114086	0.141137	2.14851	4.4337	0.530563	29.4789	0.000455543	0.00218149
RIDA	reactive intermediate imine deaminase A homolog	13.4112	10.1578	10.5372	2.75296	2.41993	2.43241	2.14798	4.43207	3.44685	87.7123	7.3804e-06	0.000252907
AC010547.9		1.50718	1.53778	1.41764	0.383088	0.355615	0.25915	2.14672	4.42821	1.7681	49.5636	6.88745e-05	0.000684832
RAD1	RAD1 checkpoint DNA exonuclease	60.6689	55.2921	48.3004	17.7916	10.552	8.74639	2.14638	4.42715	7.8222	65.3748	2.37082e-05	0.000391377
XXbac-BPGBPG55C20.2		0.799681	0.714515	0.703731	0.197396	0.0794037	0.221021	2.14437	4.42098	1.30929	26.9427	0.000620603	0.00267591
SGK494	ribosomal protein S6 kinase related	2.40051	2.02569	1.25357	0.440539	0.343514	0.493265	2.14366	4.41883	2.45135	40.7061	0.000143625	0.00104226
HERC2P9	HERC2 pseudogene 9	3.24204	3.32351	3.45908	0.872263	0.72382	0.656379	2.14314	4.41723	4.08914	100.745	4.21424e-06	0.000207559
SS18	SS18 subunit of BAF chromatin remodeling complex	7.4393	6.63371	4.77662	1.25142	1.41529	1.56163	2.14263	4.41565	4.56622	72.4011	1.58661e-05	0.000327733
EPS15	epidermal growth factor receptor pathway substrate 15	9.00864	8.76418	6.36638	2.18913	1.45435	1.81517	2.14226	4.41455	5.19917	79.2987	1.10538e-05	0.000285546
PBLD	phenazine biosynthesis like protein domain containing	0.530457	0.575075	0.425282	0.192918	0.101129	0.0508252	2.14152	4.41228	0.748623	18.3741	0.00215514	0.00647815
CTDSPL2	CTD small phosphatase like 2	6.15412	4.93057	3.57581	1.69427	0.876015	0.754742	2.14142	4.41197	4.85436	39.5593	0.000159503	0.00110998
TXLNG	taxilin gamma	48.6022	55.483	35.5289	11.2647	11.1923	9.10607	2.14109	4.41096	6.99613	80.9763	1.01675e-05	0.000278139
MPDZ	multiple PDZ domain crumbs cell polarity complex component	2.06379	2.60362	1.49679	0.640393	0.446576	0.317713	2.13914	4.40498	3.84139	40.6079	0.000144907	0.00104953
KIAA0101	PCNA clamp associated factor	4.62152	5.30444	4.86582	1.86262	0.481506	1.03838	2.13719	4.39905	3.5032	26.1407	0.0006876	0.00287345
SCP2	sterol carrier protein 2	5.29544	5.04927	5.65976	1.87278	1.0234	0.735903	2.1369	4.39817	4.75998	44.93	9.96157e-05	0.000845824
RP11-1399P15.1		6.29994	2.42107	11.8292	1.63034	0.96859	1.94717	2.13511	4.39271	1.19349	14.4376	0.00442375	0.0111171
RP11-802E16.3		11.1874	7.62367	11.4642	2.01467	2.62276	2.1199	2.1339	4.38902	2.90148	61.1694	3.07256e-05	0.000438318
GS1-309P15.4		1.13648	1.12121	0.78009	0.341897	0.338536	0	2.13355	4.38796	0.0318074	6.36784	0.033214	0.0556205
TYW3	tRNA-yW synthesizing protein 3 homolog	10.0029	13.2196	10.3657	3.75092	2.17413	1.76536	2.13318	4.38683	4.99299	49.1719	7.09735e-05	0.000695301
TRIM23	tripartite motif containing 23	1.32981	1.69984	1.14707	0.598278	0.204014	0.157218	2.13224	4.38397	2.06354	18.6102	0.00207155	0.006299
SOCS5	suppressor of cytokine signaling 5	1.2644	1.01936	0.754172	0.326457	0.0909135	0.274147	2.13167	4.38223	1.67066	20.9655	0.00142241	0.00477973
PNPLA8	patatin like phospholipase domain containing 8	4.38538	3.58676	2.49851	1.32544	0.605582	0.463775	2.13122	4.38089	3.60586	27.712	0.000563722	0.00250536
EGR3	early growth response 3	1.53705	0.747266	0.16136	0.326404	0.107732	0.121823	2.13108	4.38045	1.31343	7.90148	0.0208813	0.0380057
POLK	DNA polymerase kappa	3.27837	2.49127	1.93924	1.04106	0.459562	0.263445	2.13023	4.37788	3.8443	21.7769	0.00125864	0.00436355
TAF9B	TATA-box binding protein associated factor 9b	3.68621	4.614	3.90806	1.42998	0.843308	0.518012	2.12972	4.37631	2.81509	32.8402	0.000311949	0.0017016
TTN	titin	0.0553427	0.0706017	0.0278578	0.015786	0.00851758	0.0110471	2.12937	4.37526	1.93934	24.3584	0.000871376	0.00338102
FOXN2	forkhead box N2	1.10121	1.24035	0.571724	0.331958	0.238569	0.0959196	2.12894	4.37395	1.74231	18.0776	0.00226605	0.0067332
NPM1P32	nucleophosmin 1 pseudogene 32	1.8169	1.73163	1.24714	0.583036	0.487101	0	2.12783	4.37058	-0.611095	6.58357	0.0310067	0.052556
MARCH1	membrane associated ring-CH-type finger 1	2.37369	5.74396	4.98603	1.07457	0.896871	1.03282	2.12763	4.37	4.64667	38.1165	0.000182669	0.00121231
ZC3H13	zinc finger CCCH-type containing 13	63.5166	59.0422	57.127	18.4511	13.8912	8.60434	2.12762	4.36995	8.55521	65.2108	2.39424e-05	0.000393249
KIDINS220	kinase D interacting substrate 220	4.23832	5.13183	2.61287	1.39025	0.737455	0.640447	2.12664	4.367	4.77606	33.4938	0.000290869	0.0016292
PGBD3	piggyBac transposable element derived 3	2.04763	1.00878	0.929968	0.362298	0.293512	0.239708	2.12656	4.36674	0.592974	21.6335	0.00128583	0.00443287
PRPF38B	pre-mRNA processing factor 38B	86.1212	83.8154	100.255	22.5709	20.1692	18.5503	2.12595	4.3649	8.32204	158.952	6.42367e-07	0.000107469
DMRTA1	DMRT like family A1	0.389187	0.223022	0.416607	0.094852	0.0704397	0.0649027	2.12528	4.36289	0.292208	23.9915	0.000916423	0.00348851
TNPO1	transportin 1	8.00356	13.0307	6.04783	2.66583	1.98154	1.62139	2.12468	4.36106	6.07026	39.2389	0.00016432	0.00112767
PTPRJ	protein tyrosine phosphatase receptor type J	4.07821	4.95023	3.66771	0.957868	0.754382	1.19206	2.12453	4.36062	4.65092	68.2678	2.00048e-05	0.000362068
HIBCH	3-hydroxyisobutyryl-CoA hydrolase	1.575	2.05651	2.04168	0.666779	0.399944	0.234135	2.12405	4.35915	3.12011	32.3364	0.000329485	0.00176126
USP8	ubiquitin specific peptidase 8	7.13563	8.82555	6.30825	2.40866	1.57914	1.1431	2.12341	4.35722	6.56133	52.5206	5.52616e-05	0.000605342
IDE	insulin degrading enzyme	3.25313	5.63718	3.21629	1.37723	0.661791	0.773191	2.12317	4.35649	4.25472	34.1061	0.00027269	0.00156492
PSMC6	proteasome 26S subunit, ATPase 6	8.62805	10.589	9.22212	3.46726	1.55104	1.55026	2.1228	4.3554	5.44797	42.6798	0.000120594	0.000938739
CDC123	cell division cycle 123	22.8931	21.7262	22.0467	4.78523	5.19449	5.15293	2.12278	4.35532	5.0337	125.037	1.73966e-06	0.000146979
RP11-384B12.2		1.08335	1.7441	1.73647	0.43847	0.313991	0.280542	2.1224	4.35417	-0.0946669	19.9893	0.00165573	0.00534304
LYSMD3	LysM domain containing 3	3.63629	2.97598	2.00693	0.756853	0.850421	0.353713	2.12189	4.35263	2.98572	29.6452	0.000446736	0.0021488
MRFAP1L1	Morf4 family associated protein 1 like 1	67.0149	62.4453	55.687	18.0115	11.1566	13.264	2.12161	4.35179	6.36628	95.674	5.19701e-06	0.000221704
FNBP1L	formin binding protein 1 like	12.6766	11.8043	9.07878	3.59361	2.11994	2.00052	2.12119	4.35052	5.31689	60.7415	3.15749e-05	0.000444204
UPF3AP2	UPF3A pseudogene 2	8.53623	8.68181	10.5827	3.48884	1.37688	1.51792	2.1207	4.34905	3.07032	33.912	0.000278295	0.0015845
CTD-2012J19.3		0.660692	0.865814	0.544208	0.194345	0.0787234	0.197823	2.12043	4.34823	-0.381492	15.3105	0.00373164	0.00978781
ZMYM6	zinc finger MYM-type containing 6	0.700827	0.640671	0.603185	0.201944	0.109069	0.133613	2.12039	4.34813	1.95264	45.0665	9.84936e-05	0.000840788
ARGLU1	arginine and glutamate rich 1	147.109	143.951	148.702	38.9049	31.7912	29.7533	2.12033	4.34792	8.5144	154.994	7.13657e-07	0.000112779
RBM47	RNA binding motif protein 47	6.39641	6.6792	8.50254	1.72422	1.39651	1.79599	2.11962	4.34581	5.23355	103.93	3.71283e-06	0.000200776
TBC1D23	TBC1 domain family member 23	2.94101	3.06733	2.54784	1.33443	0.366876	0.286113	2.11885	4.34346	3.18755	16.4894	0.00299587	0.00828633
ABCA5	ATP binding cassette subfamily A member 5	0.442033	0.442152	0.503786	0.142739	0.0894389	0.0849056	2.11825	4.34166	1.92148	46.8099	8.5441e-05	0.000773053
VPS35	VPS35 retromer complex component	10.9397	14.3492	10.9775	4.09152	2.02528	2.29567	2.11736	4.339	6.18172	52.8049	5.41349e-05	0.000596584
GOLGA6L9	golgin A6 family like 9	4.98974	5.01997	4.71025	1.29416	1.06381	1.01434	2.11669	4.33699	4.31123	103.373	3.79504e-06	0.000201869
GLO1	glyoxalase I	21.0663	23.7212	30.7074	7.76076	4.22523	5.36465	2.11588	4.33454	5.18061	65.4396	2.36164e-05	0.000391377
CTAGE8	CTAGE family member 8	1.24031	1.49025	1.1759	0.453573	0.341046	0.101572	2.11454	4.33053	1.09496	17.2821	0.0026003	0.00747266
ANKIB1	ankyrin repeat and IBR domain containing 1	7.12623	6.17475	3.49063	2.18141	0.926138	0.797267	2.11365	4.32786	4.62125	25.1944	0.000778494	0.00312567
CTD-2154I11.2		34.3167	35.7048	12.8612	7.78045	4.53127	6.9404	2.11342	4.32714	3.96388	25.8645	0.000712716	0.00294887
CCNE1	cyclin E1	9.1128	9.97196	7.08964	3.41796	1.46143	1.21125	2.11265	4.32486	3.78273	29.3279	0.00046373	0.00220577
GREB1	growth regulating estrogen receptor binding 1	0.514924	0.0793248	0.0901906	0.0451078	0.039669	0.0691142	2.11124	4.32064	0.827991	8.19358	0.019194	0.0354259
BUB1	BUB1 mitotic checkpoint serine/threonine kinase	13.9587	14.0935	13.1174	4.28127	2.11357	3.13768	2.11059	4.31867	5.66892	67.9195	2.04111e-05	0.00036318
RP11-182J1.12		3.56881	2.59084	3.85823	1.07364	0.597986	0.60107	2.11019	4.31747	0.0929517	22.1203	0.00119637	0.00420682
DIXDC1	DIX domain containing 1	1.05756	1.32904	0.481585	0.244867	0.0922033	0.332099	2.11018	4.31745	2.35359	15.7148	0.00345654	0.00924146
BIRC6	baculoviral IAP repeat containing 6	2.12076	2.60399	1.15947	0.735186	0.368898	0.274392	2.10985	4.31646	4.43326	24.3508	0.000872279	0.00338274
MMS22L	MMS22 like, DNA repair protein	0.805696	1.25081	0.60143	0.418788	0.0900011	0.12062	2.10872	4.31307	3.59129	14.0038	0.00483799	0.0118829
RP11-156E6.1		0.823993	0.635841	1.23403	0.300473	0.133884	0.179432	2.10866	4.31292	0.73589	22.6569	0.00110645	0.00398799
RPGR	retinitis pigmentosa GTPase regulator	2.72317	2.47547	1.75057	0.764159	0.530873	0.312806	2.10838	4.31208	3.35571	35.5103	0.000235998	0.00142009
HSPA13	heat shock protein family A (Hsp70) member 13	2.03442	2.68864	2.32771	0.461814	0.709295	0.446574	2.1083	4.31184	2.61746	44.4109	0.00010403	0.000866153
KRIT1	KRIT1 ankyrin repeat containing	4.97938	5.06809	4.35646	1.82586	0.837797	0.688524	2.10799	4.31091	4.19912	35.569	0.000234602	0.00141483
DLEU1_1		23.3921	29.9321	16.8099	4.47915	4.98951	6.74463	2.10629	4.30583	1.49077	30.563	0.000401712	0.00200573
CRBN	cereblon	7.44194	7.88023	8.29516	3.06039	1.32348	1.11929	2.10611	4.3053	5.11537	35.5717	0.000234538	0.00141483
HAT1	histone acetyltransferase 1	19.8794	22.4652	16.7074	5.96432	4.20299	3.56168	2.10575	4.3042	6.36566	73.4011	1.50279e-05	0.000323908
CLASP2	cytoplasmic linker associated protein 2	1.74953	2.68377	1.39057	0.673316	0.318066	0.378031	2.10522	4.30262	4.20169	32.7278	0.000315759	0.00171607
NPAT	nuclear protein, coactivator of histone transcription	1.27817	1.28846	0.763872	0.47521	0.138847	0.165732	2.10514	4.3024	2.38414	18.9717	0.00195119	0.00602763
ROCK1	Rho associated coiled-coil containing protein kinase 1	15.7728	16.4261	9.39203	4.94076	3.00925	1.77406	2.10491	4.30172	6.57281	30.7681	0.000392429	0.00197696
GNB4	G protein subunit beta 4	2.0825	2.1418	1.63183	0.554803	0.446088	0.354974	2.10452	4.30054	3.09055	58.5058	3.65117e-05	0.000478889
GRIP2	glutamate receptor interacting protein 2	0.168513	0.104502	0.0861971	0.00493835	0.00550104	0.0718822	2.10437	4.3001	-0.0934538	5.4685	0.044839	0.0717234
CAPZA2	capping actin protein of muscle Z-line subunit alpha 2	6.70494	6.48646	4.86745	2.06903	1.18731	0.951628	2.10365	4.29796	4.96686	47.0427	8.38634e-05	0.000763448
GOLGA4	golgin A4	47.2687	55.7496	44.9621	18.7114	10.3029	5.63096	2.10364	4.29792	8.35118	31.0209	0.000383187	0.00194424
SLTM	SAFB like transcription modulator	59.6936	86.7659	70.3425	20.075	15.8821	14.5339	2.10324	4.29673	8.50891	87.5655	7.43027e-06	0.000254081
KLHL11	kelch like family member 11	1.08221	1.01496	0.278171	0.135463	0.219487	0.193042	2.10237	4.29413	0.300069	12.2534	0.00699268	0.0158215
FXR1	FMR1 autosomal homolog 1	30.9517	28.8856	34.7378	9.62381	6.18868	6.11156	2.1011	4.29036	7.86286	101.722	4.052e-06	0.000207559
CTD-2302E22.2		14.9294	14.7831	13.8411	4.04417	2.65678	3.36712	2.10087	4.28967	1.37182	42.8757	0.000118564	0.000930503
TM9SF2	transmembrane 9 superfamily member 2	10.4445	13.0906	11.1993	2.77977	2.60846	2.67266	2.10033	4.28808	4.79712	99.2503	4.47824e-06	0.000207559
LMAN1	lectin, mannose binding 1	39.6994	31.1389	21.4261	8.7427	7.79205	4.85569	2.09992	4.28685	6.99954	49.4079	6.96997e-05	0.000689473
AC022182.2		3.77282	3.61988	3.04508	1.19172	0.482731	0.758156	2.09946	4.2855	2.23257	34.9647	0.000249486	0.0014783
PRPF18	pre-mRNA processing factor 18	14.3575	14.4407	13.361	3.83939	3.38292	2.55468	2.09843	4.28244	4.01596	80.2482	1.05411e-05	0.000280709
TWISTNB	RNA polymerase I subunit F	10.6803	12.503	6.77702	3.72242	1.97105	1.36465	2.09779	4.28054	4.63112	28.4165	0.000517162	0.00236848
PCNA	proliferating cell nuclear antigen	33.2356	30.507	38.2014	13.9449	4.2668	5.67373	2.09763	4.28007	4.93864	28.6809	0.000500915	0.0023248
UPF3A	UPF3A regulator of nonsense mediated mRNA decay	74.7434	87.2378	98.5051	28.0344	17.1378	15.6664	2.09601	4.27527	8.26707	73.7494	1.47488e-05	0.000321484
DOCK11	dedicator of cytokinesis 11	0.685779	0.617605	0.672466	0.366772	0.0194554	0.0782228	2.09595	4.27508	1.47364	7.52999	0.0232606	0.0415419
GATA2	GATA binding protein 2	41.0206	26.7325	30.0634	6.7327	8.00569	7.74484	2.0959	4.27491	6.47418	94.6457	5.42944e-06	0.000224873
NR1D2	nuclear receptor subfamily 1 group D member 2	4.76581	5.27893	3.71201	1.32108	0.909925	0.988012	2.09477	4.27157	4.0482	66.8755	2.16909e-05	0.000373216
LBR	lamin B receptor	8.98677	11.185	7.46253	2.46738	1.70383	2.30641	2.09468	4.27131	4.90821	67.7771	2.058e-05	0.00036332
CLK4	CDC like kinase 4	2.80792	2.92032	2.50204	0.925863	0.528055	0.472724	2.09433	4.27027	3.74956	51.8936	5.78498e-05	0.000621003
DLD	dihydrolipoamide dehydrogenase	27.8908	30.834	24.314	9.69714	5.02779	4.80568	2.09428	4.27014	6.50054	52.7362	5.44046e-05	0.000598515
TDG	thymine DNA glycosylase	9.29429	11.7792	8.86168	3.5134	1.58682	1.9569	2.09409	4.26956	4.92137	45.1831	9.75475e-05	0.000835234
SENP6	SUMO specific peptidase 6	5.8024	7.71438	6.50981	2.1597	1.27449	1.28106	2.09076	4.25973	5.55902	63.3161	2.68651e-05	0.000413311
ZNF33A	zinc finger protein 33A	3.08888	3.42355	3.07598	1.04153	0.582274	0.628954	2.0891	4.25482	3.89558	60.2071	3.26763e-05	0.000451504
RP11-737O24.3		1.06386	1.09679	0.988637	0.437676	0.097509	0.196024	2.08866	4.25352	-0.105909	13.821	0.00500965	0.0122074
CD2AP	CD2 associated protein	9.29002	9.7119	4.93628	3.22977	1.29772	1.16326	2.0886	4.25335	5.06291	23.5743	0.000971181	0.003629
NUP160	nucleoporin 160	9.50444	10.172	8.23893	3.36714	1.60858	1.61687	2.08842	4.25282	5.62332	47.1804	8.29471e-05	0.000758139
PLA2G16	phospholipase A and acyltransferase 3	7.18584	7.78151	8.1637	3.49809	0.88465	1.10093	2.08767	4.25061	3.88598	20.1451	0.00161548	0.00524227
ERGIC2	ERGIC and golgi 2	8.37749	7.80365	7.78874	2.86107	1.58231	1.19003	2.08758	4.25034	4.8418	46.3506	8.86626e-05	0.000789476
WDCP	WD repeat and coiled coil containing	2.80985	2.31943	2.21655	0.533983	0.40788	0.768719	2.08756	4.25027	2.54884	45.0448	9.86713e-05	0.000841316
NCOA7	nuclear receptor coactivator 7	20.9202	22.8749	20.375	8.75506	3.56579	2.89507	2.08719	4.2492	6.68922	30.695	0.000395705	0.00198548
ZNF519	zinc finger protein 519	0.20854	0.149064	0.0897039	0.0334599	0.0248482	0.04579	2.08661	4.24747	0.598738	19.5769	0.00176831	0.00559092
IPO8P1	importin 8 pseudogene 1	0.944216	1.35616	0.794705	0.198221	0.252351	0.274789	2.08495	4.24262	1.03749	27.5735	0.000573476	0.00253448
CKAP2	cytoskeleton associated protein 2	27.7369	26.9052	25.2008	9.58413	4.61555	4.66103	2.08449	4.24124	6.22042	52.1802	5.66488e-05	0.000613481
RP11-483I13.5		8.25159	9.6008	6.13779	2.77346	1.18986	1.72056	2.08444	4.2411	2.96643	34.5244	0.000261068	0.00152582
CEP83	centrosomal protein 83	8.25632	11.6484	9.76374	3.35203	2.2045	1.46143	2.08443	4.24109	5.40749	44.1781	0.000106086	0.0008739
TMEM144	transmembrane protein 144	0.225584	0.198023	0.143434	0.082549	0.0424406	0.00710991	2.08417	4.24032	0.189212	9.43607	0.0137233	0.0270429
STXBP5	syntaxin binding protein 5	1.45743	1.27576	0.915059	0.340845	0.264532	0.250255	2.08407	4.24003	2.98898	54.13	4.92407e-05	0.00056588
SPEF2	sperm flagellar 2	0.108789	0.0891026	0.0653397	0.0327281	0.020254	0.00814336	2.08256	4.2356	-0.0952063	13.7772	0.00505482	0.0123016
MCM10	minichromosome maintenance 10 replication initiation factor	9.08974	8.74342	5.57981	3.70728	0.8631	1.03624	2.08233	4.2349	4.72042	16.0128	0.00335969	0.00903894
PHIP	pleckstrin homology domain interacting protein	9.99113	10.1738	3.96532	3.56973	1.3296	0.890144	2.08211	4.23426	6.04976	14.509	0.00468037	0.0115832
TSPAN12	tetraspanin 12	0.741272	0.912215	0.57256	0.191691	0.155296	0.175609	2.08165	4.23292	0.687244	27.7669	0.000559911	0.00249485
RP11-295P9.13		6.84936	6.0899	5.90451	1.92588	1.53023	0.965095	2.08046	4.22943	3.08475	49.7024	6.81493e-05	0.000681368
EIF4EP2	eukaryotic translation initiation factor 4E pseudogene 2	7.71878	5.14755	7.09506	2.15385	1.19963	1.3063	2.07939	4.22629	1.44795	35.205	0.000243434	0.00145208
RP11-375I20.6		1.35343	0.70542	0.665792	0.0904815	0.285575	0.253277	2.07816	4.22269	0.202033	13.5436	0.00530433	0.0127588
PSMD1	proteasome 26S subunit, non-ATPase 1	29.6303	40.6492	34.3831	10.9249	6.16363	7.79811	2.0772	4.21989	6.80896	68.3664	1.98915e-05	0.000361648
OXCT1	3-oxoacid CoA-transferase 1	12.9523	17.9164	15.8989	5.10794	2.75923	3.25921	2.07628	4.2172	5.34092	58.5709	3.63552e-05	0.000478378
MBNL1	muscleblind like splicing regulator 1	5.79521	7.36537	3.94849	2.30033	0.975232	0.835524	2.07561	4.21521	5.14918	25.5426	0.00074342	0.00302668
ARHGAP12	Rho GTPase activating protein 12	2.94774	2.68059	2.68428	0.721546	0.710171	0.520158	2.07525	4.21417	3.3495	73.4024	1.50268e-05	0.000323908
ERCC5	ERCC excision repair 5, endonuclease	15.9058	14.044	20.7348	5.57005	3.21508	3.16269	2.07503	4.21352	6.11106	64.1593	2.55132e-05	0.000407312
CCT2	chaperonin containing TCP1 subunit 2	44.8536	64.5068	53.9178	11.7262	8.42586	18.5352	2.07479	4.21284	7.18859	44.3664	0.000104418	0.000868035
DISP2	dispatched RND transporter family member 2	0.17424	0.0845685	0.151198	0.0230094	0.0205049	0.0515265	2.0744	4.21169	0.177454	15.6254	0.00351517	0.0093598
NUP35	nucleoporin 35	1.22733	0.912838	1.16175	0.261113	0.290864	0.219273	2.07219	4.20524	1.48407	43.2743	0.000114562	0.000910952
FLVCR1	FLVCR heme transporter 1	3.93939	3.37398	4.12535	1.2983	0.624163	0.785502	2.07199	4.20465	3.92118	53.7264	5.06718e-05	0.000573634
RICTOR	RPTOR independent companion of MTOR complex 2	1.68053	2.05273	1.33199	0.636736	0.342581	0.232798	2.07186	4.20429	3.83379	30.3055	0.00041376	0.00203775
MYO9A	myosin IXA	1.4359	1.40724	0.78552	0.336163	0.266323	0.259584	2.07125	4.20249	3.93037	48.0483	7.7446e-05	0.000725409
HNRNPH3	heterogeneous nuclear ribonucleoprotein H3	120.719	130.057	142.389	29.7886	30.6578	32.2286	2.06996	4.19875	8.76203	147.708	8.72221e-07	0.000124146
CRYZ	crystallin zeta	4.84902	4.77665	3.82077	1.50862	0.864262	0.8285	2.06935	4.19697	3.50804	50.2231	6.55102e-05	0.000667278
ZNF75A	zinc finger protein 75a	1.15008	1.29716	0.762336	0.334844	0.198661	0.232287	2.06909	4.19622	2.43738	37.6636	0.00019078	0.00124164
HNRNPA2B1	heterogeneous nuclear ribonucleoprotein A2/B1	400.701	391.282	480.709	149.914	71.7349	81.4468	2.06869	4.19506	10.9425	59.7768	3.35976e-05	0.000460327
LMBRD1	LMBR1 domain containing 1	4.22608	4.87137	4.72913	1.35613	0.99349	0.930215	2.06827	4.19384	2.78697	61.4377	3.02076e-05	0.000435122
SLC43A2	solute carrier family 43 member 2	1.84954	2.85673	1.68752	0.50635	0.382194	0.641307	2.06728	4.19097	3.82306	41.4847	0.000133944	0.000999088
CREG2	cellular repressor of E1A stimulated genes 2	1.49263	0.507409	2.63382	0.833185	0.118872	0.142463	2.06711	4.19046	2.75157	6.78628	0.030013	0.0511809
LDHB	lactate dehydrogenase B	318.664	365.336	392.904	124.202	58.7717	74.5842	2.06639	4.18836	9.36852	60.6257	3.18098e-05	0.000445583
DENND5B	DENN domain containing 5B	2.49124	3.47074	1.68637	0.607162	0.557838	0.665304	2.06625	4.18797	4.1743	43.1797	0.000115496	0.000914365
THRB	thyroid hormone receptor beta	0.929313	0.878191	1.35622	0.397617	0.165157	0.188647	2.06474	4.18359	2.51098	30.323	0.000412925	0.00203425
ZNF587B	zinc finger protein 587B	2.66836	3.12666	0.763593	0.536003	0.380636	0.66017	2.06422	4.18208	2.59702	15.8448	0.00337344	0.00906995
RUFY2	RUN and FYVE domain containing 2	14.9432	16.9628	19.6294	4.05372	3.79246	4.36121	2.06416	4.1819	6.43101	115.751	2.38981e-06	0.000161999
CTD-2215E18.1		1.25471	1.80466	0.991482	0.245506	0.565191	0.146608	2.0638	4.18085	0.649827	13.2076	0.00569048	0.0134706
NDC80	NDC80 kinetochore complex component	17.3756	16.2151	20.8489	7.11644	3.15094	2.74733	2.06378	4.18081	5.33042	36.534	0.000213025	0.00133098
RP4-657D16.3		1.644	1.47341	1.20921	0.354929	0.359427	0.307088	2.06363	4.18036	0.752117	31.5987	0.000357416	0.00185927
RP11-54O7.3		1.49995	1.17293	2.51091	0.141359	0.338552	0.728078	2.06342	4.17976	2.15427	13.3913	0.00547515	0.0130692
TBC1D4	TBC1 domain family member 4	9.98019	10.4563	6.8426	2.9928	1.743	1.81121	2.06297	4.17846	5.233	53.1133	5.29443e-05	0.000590661
THAP12P7	THAP domain containing 12 pseudogene 7	0.575061	0.385363	0.49999	0.0256298	0.171301	0.143487	2.06287	4.17817	-0.415361	9.88915	0.0122209	0.0246767
ZC3H15	zinc finger CCCH-type containing 15	104.579	139.314	101.79	42.08	23.0346	18.243	2.06285	4.17812	7.80608	42.8911	0.000118406	0.000929841
OXCT2P1	3-oxoacid CoA-transferase 2 pseudogene 1	1.32261	0.425856	0.706654	0.229416	0.170371	0.171249	2.06268	4.17761	-0.259833	14.0466	0.0047848	0.011779
RP11-475E11.9		2.01947	2.2885	2.2179	0.474175	0.586892	0.471935	2.0623	4.1765	-0.302186	20.1692	0.00160936	0.00522886
ARL6	ADP ribosylation factor like GTPase 6	0.299904	0.228663	0.144924	0.115486	0.0142938	0.028735	2.06089	4.17242	-0.51858	8.05201	0.0199774	0.036602
CTD-2620I22.1		2.77825	2.00953	1.41665	0.689874	0.354683	0.41593	2.06056	4.17148	-0.376612	15.4341	0.00364475	0.00961524
PGRMC1	progesterone receptor membrane component 1	40.6596	48.7457	43.116	16.4699	7.12057	8.35588	2.06048	4.17124	5.7161	44.17	0.000106159	0.0008739
ADAM9	ADAM metallopeptidase domain 9	36.702	40.5423	30.8806	12.2131	7.13097	6.65915	2.06032	4.1708	7.27163	61.8138	2.9499e-05	0.000433209
GMNN	geminin DNA replication inhibitor	52.4992	59.1383	58.6677	24.3208	7.82921	9.03741	2.06021	4.17048	6.44219	27.6942	0.000564962	0.00250726
PRDX1	peroxiredoxin 1	217.481	252.521	289.115	43.0166	57.8839	78.6919	2.05931	4.16788	7.89392	61.8106	2.95051e-05	0.000433209
SLC3A1	solute carrier family 3 member 1	0.264244	0.364771	0.363912	0.0852434	0.0699677	0.0803754	2.05921	4.16759	0.487285	27.1289	0.000606207	0.00262916
FIG4	FIG4 phosphoinositide 5-phosphatase	1.70324	1.54687	1.78672	0.522871	0.309426	0.365907	2.05901	4.167	1.91808	46.9284	8.46337e-05	0.000768927
GPD2	glycerol-3-phosphate dehydrogenase 2	3.38962	4.02903	2.42985	1.6406	0.493433	0.266358	2.05868	4.16604	3.87441	12.5452	0.00675152	0.0153769
CHRNA10	cholinergic receptor nicotinic alpha 10 subunit	0.669894	0.411125	0.300975	0.217138	0.0483757	0.0607815	2.05766	4.16311	-0.264348	9.96596	0.0119867	0.0243368
ZNF148	zinc finger protein 148	4.64432	4.12342	2.57598	1.38488	0.760518	0.587313	2.05717	4.1617	4.63414	33.0689	0.000304364	0.00167994
OSBPL8	oxysterol binding protein like 8	3.9402	5.4865	2.43393	1.3081	0.867182	0.70018	2.05683	4.16072	4.51094	31.6737	0.000354447	0.00185152
CCNA2	cyclin A2	31.073	27.4863	34.4277	9.65969	4.89531	7.68029	2.05672	4.1604	5.73983	67.8747	2.0464e-05	0.00036318
MTBP	MDM2 binding protein	1.26533	1.26011	1.29557	0.482876	0.274837	0.15786	2.05665	4.16018	2.72475	29.2185	0.000469774	0.00222401
RP11-386G11.3		11.3084	8.4347	4.53584	3.57623	1.05451	1.17772	2.05628	4.15912	0.547473	12.4608	0.00668077	0.0152536
HACE1	HECT domain and ankyrin repeat containing E3 ubiquitin protein ligase 1	0.629602	0.45287	0.570786	0.231898	0.07785	0.0853652	2.05571	4.15749	1.67505	21.848	0.00124544	0.0043344
PEX1	peroxisomal biogenesis factor 1	1.9644	1.89886	1.93861	0.691686	0.333188	0.368397	2.05521	4.15605	3.23806	45.4109	9.5731e-05	0.000827956
FBXO10	F-box protein 10	1.49597	1.28623	0.693359	0.244674	0.288905	0.295874	2.05418	4.15307	2.12884	31.5674	0.000358663	0.00186222
NOP58	NOP58 ribonucleoprotein	78.6382	121.465	100.339	33.0022	23.3259	16.3047	2.05366	4.15158	7.6838	49.7151	6.80831e-05	0.000681124
RGPD6	RANBP2 like and GRIP domain containing 6	0.60193	0.636056	0.289786	0.145529	0.142461	0.0790045	2.05353	4.1512	2.09878	24.2608	0.000883096	0.0034016
C11orf65	chromosome 11 open reading frame 65	0.358122	0.454466	0.299258	0.124913	0.120593	0.0186484	2.05145	4.14523	-0.195728	10.1667	0.0114004	0.0233845
MTDH	metadherin	28.5342	31.2423	24.2047	8.02187	6.70575	5.48584	2.05095	4.1438	6.79545	89.2841	6.87109e-06	0.000246345
IMPA1	inositol monophosphatase 1	3.03115	3.24209	2.7539	1.30953	0.421805	0.459312	2.05036	4.14208	2.80679	23.0115	0.00105158	0.00385158
FAXDC2	fatty acid hydroxylase domain containing 2	3.25561	2.33073	2.31135	0.674531	0.516013	0.696115	2.05002	4.1411	3.5583	67.8559	2.04863e-05	0.00036318
SACS	sacsin molecular chaperone	3.69269	4.07375	1.719	0.76547	0.758179	0.766311	2.04993	4.14085	4.94372	36.921	0.000205063	0.00130231
MIER1	MIER1 transcriptional regulator	10.1344	11.6033	7.69936	4.39855	1.54104	1.27097	2.04806	4.13548	5.65978	21.4143	0.00133353	0.0045591
MTPN	myotrophin	11.1267	11.7664	7.71033	2.8219	1.57604	3.01166	2.04721	4.13306	4.58489	45.1756	9.76077e-05	0.00083531
PLA2G4A	phospholipase A2 group IVA	1.27872	1.63707	1.66637	0.745137	0.29563	0.0685742	2.04661	4.13135	1.47622	9.91383	0.012145	0.0245693
GOLGB1	golgin B1	29.0885	35.9846	23.8127	11.4986	6.41124	3.8051	2.04537	4.12779	7.77515	30.0154	0.000427864	0.00208451
MAGI3	membrane associated guanylate kinase, WW and PDZ domain containing 3	3.35394	3.11661	2.82155	1.07985	0.539503	0.630658	2.04478	4.1261	3.97651	51.9214	5.77323e-05	0.000621003
DEK	DEK proto-oncogene	276.554	299.691	255.357	130.85	38.4693	34.9305	2.04459	4.12557	9.55073	19.3707	0.00200112	0.00613882
NOL10	nucleolar protein 10	31.2377	39.5222	30.4461	7.82002	7.66811	8.945	2.04433	4.12482	6.32776	91.7077	6.16759e-06	0.000232059
ARHGAP21	Rho GTPase activating protein 21	9.87337	12.0703	14.5489	3.56597	2.49874	2.73996	2.04405	4.124	6.36378	85.162	8.30937e-06	0.000263347
STXBP4	syntaxin binding protein 4	0.218813	0.219043	0.165215	0.0617643	0.0434538	0.040038	2.04383	4.12339	1.21102	33.9834	0.000276218	0.00157699
EPT1	selenoprotein I	3.24013	3.94797	3.09695	1.01572	0.665113	0.814546	2.04308	4.12124	4.19318	69.0912	1.90832e-05	0.000357854
ARHGAP11A	Rho GTPase activating protein 11A	36.5732	35.0539	28.8888	11.5915	6.63156	6.19547	2.04259	4.11984	7.06134	61.4642	3.01569e-05	0.00043493
RBM25	RNA binding motif protein 25	75.3908	94.3657	76.1265	32.3008	14.3589	13.6432	2.03992	4.11223	9.24022	38.5612	0.000175112	0.00118033
NRIP1	nuclear receptor interacting protein 1	1.78553	2.07716	1.41843	0.967038	0.153889	0.185619	2.03952	4.11108	3.22804	10.4057	0.0110071	0.0227479
USP48	ubiquitin specific peptidase 48	14.0888	16.3612	15.2543	5.42303	2.73649	2.9928	2.03909	4.10986	6.48956	57.2049	3.98227e-05	0.000501211
ZNF146	zinc finger protein 146	30.9821	33.118	28.1615	10.8933	6.4339	5.1594	2.03904	4.10971	6.30756	53.7937	5.04296e-05	0.000573214
MDH1	malate dehydrogenase 1	6.57566	6.50414	7.5418	2.34064	1.31677	1.34331	2.03864	4.10858	4.41036	61.5778	2.99412e-05	0.000433975
UEVLD	UEV and lactate/malate dehyrogenase domains	2.03463	1.98537	2.54051	0.718356	0.474196	0.393229	2.03701	4.10394	2.90899	49.9907	6.66723e-05	0.000673634
RP11-582E3.6		0.574946	0.526885	0.841918	0.252304	0.0702631	0.141251	2.03657	4.10268	-0.310501	13.5242	0.00532577	0.0127933
FAM161A	FAM161 centrosomal protein A	4.13722	4.00154	2.79968	2.02272	0.336111	0.350357	2.03595	4.10093	3.57971	9.96844	0.0125669	0.0252191
TAF2	TATA-box binding protein associated factor 2	17.4073	21.0425	14.6858	5.82262	3.66994	3.51822	2.03498	4.09816	6.17665	60.8869	3.12831e-05	0.000443457
DYX1C1	dynein axonemal assembly factor 4	4.09565	6.21606	4.98075	1.65035	1.08075	1.00793	2.03459	4.09705	3.23089	45.7755	9.29089e-05	0.000813053
PSIP1	PC4 and SFRS1 interacting protein 1	96.4692	102.569	130.269	41.7298	20.4602	18.2353	2.03382	4.09487	8.84358	44.5525	0.000102802	0.000859427
NUP54	nucleoporin 54	7.02428	5.98652	7.06171	2.3841	1.25545	1.24574	2.03225	4.09042	4.07471	52.093	5.7011e-05	0.00061659
CEP78	centrosomal protein 78	2.59923	2.63889	2.79165	1.02011	0.434955	0.510445	2.03215	4.09015	4.57663	42.7775	0.000119575	0.000935735
PGBD4	piggyBac transposable element derived 4	0.0995834	0.217501	0.154938	0.0443832	0.0494403	0.0198781	2.03207	4.08992	-0.49559	11.9908	0.00741406	0.0165585
HSPE1P2	heat shock protein family E (Hsp10) member 1 pseudogene 2	14.7935	12.3902	14.7701	4.12381	3.41855	2.57713	2.03205	4.08985	1.43725	39.809	0.00015587	0.00109736
VDAC3	voltage dependent anion channel 3	17.5302	25.0779	22.2649	6.05422	4.20462	5.59671	2.03198	4.08966	5.40497	72.7198	1.55929e-05	0.000326099
TARDBP	TAR DNA binding protein	45.394	58.3809	49.0205	14.5982	9.50382	13.2765	2.03177	4.08906	7.58952	84.8786	8.42127e-06	0.000265645
AKAP9	A-kinase anchoring protein 9	7.48631	8.55252	5.23197	3.15379	1.3374	0.779509	2.03069	4.08601	6.33322	19.4404	0.00183777	0.00576255
CTD-2525I3.5		2.3323	3.07102	2.08962	0.787816	0.146264	0.882107	2.03068	4.08598	-0.401884	10.3385	0.0109268	0.0226213
WNK2	WNK lysine deficient protein kinase 2	0.424063	0.324418	0.285374	0.1512	0.0173382	0.0846483	2.03034	4.08501	1.52569	11.3813	0.00851952	0.0185813
ACADSB	acyl-CoA dehydrogenase short/branched chain	1.25005	1.84454	1.67153	0.436322	0.26131	0.467531	2.03006	4.08421	2.64416	39.6992	0.000157456	0.00110349
ZNF322P1	zinc finger protein 322 pseudogene 1	2.06502	1.13544	1.24611	0.582554	0.243349	0.244604	2.02979	4.08346	0.227513	16.2054	0.00315545	0.00860756
ASUN	integrator complex subunit 13	74.2104	71.427	86.0241	23.9244	17.1317	15.3143	2.02951	4.08267	7.32029	99.5068	4.43153e-06	0.000207559
CENPI	centromere protein I	0.571435	0.915256	0.571798	0.17658	0.158872	0.167296	2.02909	4.08147	0.937839	27.2922	0.000593927	0.00259387
MUC5AC	mucin 5AC, oligomeric mucus/gel-forming	0.172964	0.344678	0.448994	0.188375	0.0206092	0.0301316	2.029	4.08123	1.8275	7.14226	0.0263518	0.0460854
RP11-1035H13.2		9.57573	11.9511	5.34178	3.98327	1.72052	0.910207	2.02868	4.08031	1.05985	12.8241	0.00617453	0.0143228
PKD2	polycystin 2, transient receptor potential cation channel	3.61279	3.41825	2.44972	1.06752	0.552958	0.70522	2.02758	4.07722	3.44178	44.2117	0.000105786	0.000873608
CTB-119C2.1		1.57272	1.20283	0.46913	0.207687	0.161946	0.418579	2.02686	4.07518	0.0225147	10.9124	0.00951096	0.0202604
KLHL23	kelch like family member 23	1.35956	1.77988	1.18139	0.330271	0.391638	0.334012	2.02502	4.06999	2.32762	43.4477	0.000112873	0.000903259
RP11-295P9.3		0.219306	0.265621	0.128456	0.0273679	0.0479069	0.0744197	2.02463	4.06886	0.987637	16.5733	0.00295067	0.00819171
SETMAR	SET domain and mariner transposase fusion gene	1.969	2.05251	2.38209	0.526536	0.494885	0.534284	2.02457	4.06871	2.25752	59.1871	3.49128e-05	0.00046727
KIAA1429	vir like m6A methyltransferase associated	13.1305	15.5851	8.29434	3.44656	2.96822	2.69982	2.02356	4.06586	6.37881	53.9912	4.97271e-05	0.000569018
RFC1	replication factor C subunit 1	21.4357	19.894	22.4243	7.1737	4.10511	4.35143	2.02327	4.06503	6.46604	76.5045	1.2751e-05	0.000305505
NOX5	NADPH oxidase 5	0.122802	0.156747	0.137276	0.0117281	0.0470321	0.0420219	2.02301	4.06431	0.19451	12.9882	0.00596132	0.0139675
AC092687.5		104.254	138.085	109.218	29.6059	25.6891	30.9975	2.02276	4.06361	5.37097	84.3304	8.64298e-06	0.000267965
TRIM33	tripartite motif containing 33	5.02053	5.32565	2.76951	1.51421	0.990189	0.737891	2.02207	4.06166	4.71267	33.658	0.000285851	0.00161461
LTBP1	latent transforming growth factor beta binding protein 1	1.56099	1.79722	3.31362	0.896922	0.205176	0.538002	2.02084	4.0582	3.33837	16.7295	0.00286869	0.00802985
KIF3A	kinesin family member 3A	5.47505	5.80792	4.41862	1.47159	1.42482	0.953183	2.0207	4.0578	4.4873	62.3068	2.86011e-05	0.000426319
HPS3	HPS3 biogenesis of lysosomal organelles complex 2 subunit 1	7.13947	5.2454	6.48278	2.20002	1.32724	1.09248	2.01953	4.05451	4.6066	53.539	5.13533e-05	0.000578436
RBM41	RNA binding motif protein 41	6.51592	5.82331	4.58311	2.02022	1.16271	0.990978	2.01874	4.0523	4.42317	45.4756	9.52223e-05	0.000825311
SNX2	sorting nexin 2	17.6323	20.5373	25.7112	6.97437	4.67987	4.03972	2.01864	4.05201	5.81342	63.9637	2.58193e-05	0.000409024
MORF4L1	mortality factor 4 like 1	67.6255	80.3807	83.7068	19.4378	16.0024	21.3899	2.01849	4.05161	8.30482	110.551	2.88519e-06	0.000173621
SCAF11	SR-related CTD associated factor 11	14.7566	16.2433	11.2559	5.00568	3.02792	2.45122	2.01643	4.04581	6.94786	48.6252	7.40362e-05	0.00070971
XRN1	5'-3' exoribonuclease 1	2.28741	2.96784	1.1819	0.906199	0.362857	0.348275	2.01417	4.03949	4.0202	18.8508	0.00199045	0.00611524
AF230666.2		4.31046	5.86249	4.22605	1.76117	0.969896	0.841957	2.01401	4.03904	2.17383	31.115	0.000377314	0.0019231
TMEM267	transmembrane protein 267	1.22494	1.09707	1.20219	0.343828	0.238084	0.280931	2.01375	4.03829	1.24169	39.668	0.000157909	0.00110531
TCAIM	T cell activation inhibitor, mitochondrial	1.31481	1.39441	1.35095	0.463201	0.246773	0.293144	2.01352	4.03765	2.89162	48.9047	7.24503e-05	0.000702515
NLN	neurolysin	4.42302	5.45139	3.70445	1.28128	0.949524	1.1345	2.01312	4.03655	4.95676	69.7741	1.83582e-05	0.000351446
RP11-573D15.9		14.0491	10.4182	8.38645	3.63159	2.05674	2.42331	2.01207	4.0336	4.0335	47.9334	7.8148e-05	0.000729367
FANCI	FA complementation group I	14.9505	14.3137	14.5339	5.46414	2.57192	2.83482	2.01162	4.03234	6.13921	51.6283	5.89901e-05	0.00062798
BIVM-ERCC5	BIVM-ERCC5 readthrough	18.1779	16.9283	20.5297	6.46957	3.76072	3.51914	2.01056	4.02939	5.57969	63.9553	2.58326e-05	0.000409024
RP1-273G13.2		3.33079	3.55039	2.69542	0.656304	1.04441	0.629875	2.01043	4.02904	-0.545723	15.4086	0.00366245	0.00964779
UBR2	ubiquitin protein ligase E3 component n-recognin 2	6.93329	7.73113	6.11481	2.61261	1.2647	1.30467	2.01015	4.02825	5.25791	44.6859	0.000101662	0.000854288
RNMT	RNA guanine-7 methyltransferase	5.78018	5.9405	3.21075	1.37862	1.18923	1.13419	2.00982	4.02732	4.44639	47.8588	7.86081e-05	0.000731563
ZCCHC11	terminal uridylyl transferase 4	3.4601	3.20408	2.50177	1.2337	0.56101	0.490879	2.00933	4.02595	4.94862	33.3522	0.000295284	0.00164826
TSNAX	translin associated factor X	3.6003	4.88617	4.76514	1.49058	0.995206	0.805535	2.00838	4.0233	4.10915	50.3875	6.47029e-05	0.00066446
ABCE1	ATP binding cassette subfamily E member 1	8.49988	11.3991	8.98879	2.04697	2.67155	2.41259	2.00787	4.02189	5.2402	69.9531	1.81738e-05	0.000350492
GCC2	GRIP and coiled-coil domain containing 2	2.91249	3.81918	2.25041	1.11357	0.617766	0.519521	2.00785	4.02183	4.64411	34.9151	0.000250759	0.00148314
FAM217B	family with sequence similarity 217 member B	1.84516	2.65258	1.51136	0.496178	0.540431	0.456796	2.00651	4.01808	2.75678	40.0802	0.000152037	0.00108024
CCDC82	coiled-coil domain containing 82	7.12515	7.89199	5.59072	3.46156	1.04989	0.690747	2.00615	4.01708	4.8808	14.5589	0.00446635	0.011193
SLIT2	slit guidance ligand 2	0.93786	1.62884	0.713563	0.154104	0.313031	0.348478	2.00481	4.01336	2.75854	19.7774	0.00171244	0.00545682
PTPN11	protein tyrosine phosphatase non-receptor type 11	31.1183	33.1968	20.0358	8.99163	6.44294	5.62392	2.00455	4.01264	6.94871	54.899	4.66493e-05	0.000547053
ATP2C1	ATPase secretory pathway Ca2+ transporting 1	11.5007	13.6208	9.59049	4.00316	2.15302	2.5415	2.00349	4.00968	5.95055	54.036	4.95697e-05	0.000568601
SH3GL1P3	SH3 domain containing GRB2 like 1, endophilin A2 pseudogene 3	1.53401	0.45688	1.13396	0.18933	0.351504	0.21199	2.00337	4.00935	-0.593165	10.7183	0.00996306	0.0210399
ITGB1P1	integrin subunit beta 1 pseudogene 1	8.24408	4.02518	4.99709	2.313	0.966204	0.971186	2.00322	4.00893	1.15724	19.0427	0.00192855	0.00596789
SAPCD1	suppressor APC domain containing 1	5.18045	3.84153	11.9788	1.43244	1.95258	1.7094	2.00316	4.00876	2.75547	22.1991	0.00118262	0.00417198
UBE2V2	ubiquitin conjugating enzyme E2 V2	9.9217	9.67274	9.06301	3.1363	2.01405	1.97967	2.00289	4.00803	5.29814	78.3072	1.16223e-05	0.000291234
PIK3CA	phosphatidylinositol-4,5-bisphosphate 3-kinase catalytic subunit alpha	1.2448	1.2225	1.28067	0.430323	0.229257	0.272337	2.00205	4.00569	2.88258	49.4165	6.96538e-05	0.000689473
MORF4L1P1	mortality factor 4 like 1 pseudogene 1	52.5724	66.2139	68.2387	18.2389	12.4404	15.8686	2.00185	4.00514	5.23463	80.8616	1.02253e-05	0.000278502
ANKMY2	ankyrin repeat and MYND domain containing 2	6.42142	7.421	5.99663	2.52949	1.46612	0.967103	2.00185	4.00513	3.56697	33.3023	0.000296858	0.00165365
RP11-545I5.3		0.345407	0.35271	0.423686	0.143948	0.0481048	0.0859607	1.99892	3.99701	0.569873	19.1383	0.0018986	0.00590437
MORF4L2	mortality factor 4 like 2	87.4135	91.8942	93.2717	22.8962	18.1473	26.7037	1.99826	3.99518	7.22814	103.186	3.82305e-06	0.000202484
TAF5	TATA-box binding protein associated factor 5	4.23953	4.68064	5.19086	1.59841	0.680206	1.24677	1.99818	3.99497	3.26768	39.5132	0.000160186	0.0011133
SEH1L	SEH1 like nucleoporin	3.7144	4.41884	2.24236	0.951979	0.736077	0.915435	1.99744	3.9929	4.51328	44.2279	0.000105642	0.00087286
PHF10	PHD finger protein 10	10.634	14.8657	12.648	2.99613	3.20756	3.30128	1.99717	3.99217	5.4634	80.3033	1.05122e-05	0.000280709
GLMN	glomulin, FKBP associated protein	6.61839	8.54738	5.30139	2.64216	1.3031	1.21949	1.99711	3.99199	3.6463	31.6226	0.000356465	0.00185832
ARID2	AT-rich interaction domain 2	1.37323	1.75187	0.854708	0.399284	0.353128	0.246567	1.99691	3.99143	3.34786	33.1262	0.0003025	0.00167362
CDC42BPA	CDC42 binding protein kinase alpha	5.25671	6.05785	3.45364	1.76223	1.04664	0.914099	1.99641	3.99006	5.44206	39.223	0.000164565	0.00112879
CTD-2007L18.5		1.02819	0.806655	1.40464	0.40237	0.239049	0.150176	1.9962	3.98948	-0.331108	14.3372	0.00451314	0.0112721
HOMER1	homer scaffold protein 1	6.38848	7.76482	4.89616	2.23172	1.42361	1.14796	1.99372	3.98261	4.61944	42.3524	0.000124081	0.000954927
SAMD9L	sterile alpha motif domain containing 9 like	0.972826	1.20019	0.384291	0.382508	0.201592	0.0644735	1.99309	3.98088	1.96226	9.93282	0.0120871	0.0244794
HACD3	3-hydroxyacyl-CoA dehydratase 3	22.3402	25.7533	23.6649	5.74766	4.72131	7.45878	1.9927	3.97982	6.72937	80.1246	1.06061e-05	0.000280709
PLPP2	phospholipid phosphatase 2	1.20095	0.856584	1.32749	0.424041	0.250072	0.167574	1.99122	3.97572	2.31982	29.4042	0.000459571	0.00219368
ZNF44	zinc finger protein 44	0.484337	0.409836	0.65621	0.290508	0.0647218	0.0325278	1.99038	3.97341	1.00292	8.59995	0.0171478	0.0323612
OSBPL11	oxysterol binding protein like 11	6.18618	7.25282	5.93129	2.60481	1.1076	1.19172	1.98961	3.97129	4.08698	34.4021	0.000264403	0.00153649
TMEM64	transmembrane protein 64	0.789873	0.707143	0.677562	0.299961	0.11138	0.134345	1.98928	3.97039	1.44058	23.4459	0.000988838	0.00367893
ATP6V1A	ATPase H+ transporting V1 subunit A	6.46573	6.12276	4.22891	2.22527	1.1279	0.896722	1.98919	3.97015	4.17343	31.248	0.00037171	0.00190442
RP11-654A16.3		1.49307	2.11226	2.04973	0.399268	0.33357	0.670581	1.98889	3.96931	-0.407358	14.9925	0.00396716	0.0102465
HMGCR	3-hydroxy-3-methylglutaryl-CoA reductase	4.65715	4.91713	4.96931	1.85568	0.810015	1.00452	1.9882	3.96741	4.23688	42.7579	0.000119779	0.000936488
ZBED5	zinc finger BED-type containing 5	2.206	1.53848	1.8154	0.676044	0.376537	0.338447	1.9881	3.96713	3.38458	42.8954	0.000118362	0.000929841
CEP76	centrosomal protein 76	0.989058	0.950068	0.787769	0.324056	0.132713	0.229444	1.98736	3.96511	1.83129	29.6955	0.000444111	0.00214123
RP5-867C24.5		3.91349	5.53645	2.95489	1.52617	0.777175	0.830006	1.98698	3.96407	0.857831	19.9184	0.00167442	0.00538203
RNF32	ring finger protein 32	1.38714	1.21884	0.813419	0.449827	0.194449	0.218004	1.98585	3.96097	1.66805	23.5315	0.00097703	0.00364667
PDE8A	phosphodiesterase 8A	2.9119	3.04629	3.18274	0.621457	0.630087	1.03334	1.9845	3.95725	3.91217	53.5203	5.14221e-05	0.000578436
G2E3	G2/M-phase specific E3 ubiquitin protein ligase	1.04252	0.916453	0.776352	0.393951	0.162795	0.135176	1.98334	3.95407	2.41113	23.354	0.00100172	0.00371749
MTM1	myotubularin 1	0.792452	0.748748	0.930338	0.241141	0.227918	0.147274	1.9819	3.95012	1.0862	31.6023	0.00035727	0.00185927
RSRC1	arginine and serine rich coiled-coil 1	32.1856	32.9783	32.7277	13.8501	5.73686	5.32337	1.98142	3.94881	6.70466	33.5852	0.000288062	0.00162073
USP15	ubiquitin specific peptidase 15	2.03878	2.75036	1.37636	0.78738	0.447807	0.341817	1.98112	3.948	4.65738	27.9919	0.000544628	0.00245565
ZMPSTE24	zinc metallopeptidase STE24	7.95714	13.4325	6.42771	3.53271	1.6107	2.00536	1.98086	3.94729	4.39396	26.2071	0.000681721	0.00285621
RP11-321C24.1		4.79028	4.98049	4.87835	0.838462	1.34911	1.46038	1.98049	3.94627	0.033542	19.5686	0.00177069	0.00559642
SCAMP1	secretory carrier membrane protein 1	1.83224	2.25322	2.33093	0.666697	0.576203	0.373245	1.97951	3.94359	2.78457	44.1972	0.000105915	0.0008739
POU2F1	POU class 2 homeobox 1	1.42984	1.34448	0.860721	0.361401	0.292597	0.264904	1.97882	3.9417	3.58779	49.2543	7.05256e-05	0.000692496
TMTC1	transmembrane O-mannosyltransferase targeting cadherins 1	1.05535	1.2059	1.47608	0.441115	0.22782	0.27614	1.97873	3.94145	3.51509	46.0246	9.10395e-05	0.000802736
PER3	period circadian regulator 3	2.95727	0.871693	0.662219	0.62323	0.185669	0.320511	1.97776	3.9388	2.91613	10.3846	0.0108228	0.0224496
ATP1A3	ATPase Na+/K+ transporting subunit alpha 3	0.372424	0.394383	0.528314	0.215781	0.0123265	0.0991206	1.97774	3.93877	0.573957	7.71163	0.0220297	0.0397271
CDC40	cell division cycle 40	7.07797	7.67365	6.6282	3.23272	1.17653	1.06102	1.97769	3.93861	4.73245	24.5858	0.00084482	0.00330715
ZMAT3	zinc finger matrin-type 3	0.418098	0.389665	0.234276	0.0425924	0.149114	0.0681287	1.97726	3.93744	1.1141	14.0184	0.00481219	0.0118356
FAM227A	family with sequence similarity 227 member A	0.300284	0.233439	0.257123	0.0952709	0.0485148	0.0548606	1.97698	3.93669	0.874944	26.2866	0.000674774	0.00283659
ZNF195	zinc finger protein 195	2.46047	2.97131	2.20612	1.13087	0.33211	0.494978	1.9766	3.93564	3.19911	22.0197	0.00121421	0.0042519
RCN2	reticulocalbin 2	3.16002	3.70591	3.61487	0.738121	0.894005	1.00356	1.97646	3.93527	4.45727	73.381	1.50442e-05	0.000323908
ZNF615	zinc finger protein 615	0.845798	0.627264	0.553652	0.395436	0.0400448	0.0805026	1.97617	3.93447	1.08866	7.96749	0.020464	0.0373716
TRIM52	tripartite motif containing 52	3.89662	2.94867	3.14075	0.791568	0.971431	0.736086	1.97605	3.93413	3.77209	68.8149	1.93865e-05	0.000359811
SNX14	sorting nexin 14	3.59496	3.70317	5.15258	1.39606	0.846579	0.901816	1.97556	3.93281	4.20292	56.8091	4.09026e-05	0.00051017
RP11-231C14.4		14.5443	13.8783	20.3285	5.00735	3.45693	3.81616	1.97551	3.93267	5.45342	77.5799	1.20623e-05	0.000298386
CH17-264L24.1		0.17595	0.0931624	0.193239	0.0209118	0.0388241	0.054634	1.97496	3.93118	-0.203001	13.1558	0.00575308	0.0135911
AMD1	adenosylmethionine decarboxylase 1	6.45374	5.79548	4.92678	2.10481	1.20023	1.06146	1.9745	3.92992	4.65578	48.5135	7.46815e-05	0.000712538
EDRF1-AS1	EDRF1 antisense RNA 1	1.58625	1.16672	0.605952	0.368856	0.279401	0.198241	1.97328	3.92661	0.544651	16.1748	0.00317326	0.00864454
BCO2	beta-carotene oxygenase 2	0.290961	0.226273	0.204157	0.0950973	0	0.0871192	1.9731	3.9261	0.114793	5.43716	0.0453295	0.0723562
ATG4A	autophagy related 4A cysteine peptidase	1.45284	2.04348	1.34853	0.401041	0.379726	0.44904	1.97291	3.92559	1.60309	34.3485	0.00026588	0.00154218
FAM162A	family with sequence similarity 162 member A	19.3703	11.8312	15.8638	4.61121	3.52496	3.69907	1.97174	3.9224	5.20819	79.2703	1.10696e-05	0.000285546
ARRB1	arrestin beta 1	0.903837	1.06555	1.14775	0.14099	0.291674	0.349558	1.97114	3.92078	1.94537	25.2504	0.00077272	0.00310864
KIAA0907	KH domain containing 4, pre-mRNA splicing factor	7.07912	6.6703	5.63585	1.50506	1.4097	1.98842	1.97087	3.92004	4.51409	70.9439	1.71932e-05	0.000342957
KIAA1107	BTB domain containing 8	0.796398	0.337699	0.763466	0.28155	0.112585	0.0808326	1.97005	3.91781	0.7261	13.0683	0.00586066	0.0137972
G3BP2	G3BP stress granule assembly factor 2	20.3387	21.7093	15.8352	4.35515	4.87413	5.43905	1.96995	3.91756	6.44389	79.2149	1.11005e-05	0.000285891
SETD2	SET domain containing 2, histone lysine methyltransferase	14.2256	18.5557	10.8085	5.72629	2.95609	2.5581	1.96978	3.91707	6.52165	32.9783	0.000307342	0.00168836
ZNF143	zinc finger protein 143	8.80805	7.54376	7.39572	2.02435	2.05422	1.91733	1.9695	3.91632	4.3912	95.4055	5.2565e-06	0.000222234
DAB2	DAB adaptor protein 2	1.46828	3.96008	1.14011	0.688306	0.343123	0.681269	1.96946	3.91621	3.44421	14.1978	0.00465228	0.0115357
SLK	STE20 like kinase	25.7734	31.2621	20.7599	13.3298	4.13646	2.74439	1.96939	3.91601	7.02447	14.1507	0.00501916	0.0122228
SKAP2	src kinase associated phosphoprotein 2	9.66197	5.50662	6.9323	2.85487	1.20811	1.54768	1.96875	3.91429	4.66043	34.9465	0.000249954	0.00147946
RP11-855A2.2		1.50066	1.20714	1.40865	0.32927	0.366787	0.337955	1.96834	3.91317	0.921408	33.77	0.000282489	0.00160156
RECK	reversion inducing cysteine rich protein with kazal motifs	0.608159	0.702892	0.638009	0.135929	0.0973397	0.260911	1.96828	3.913	1.33584	21.9049	0.00123498	0.0043063
N4BP2L2	NEDD4 binding protein 2 like 2	5.06322	4.99903	5.15211	1.95526	1.19118	0.738153	1.96793	3.91205	5.75007	38.7551	0.000171938	0.00116561
C3orf58	divergent protein kinase domain 2A	0.730006	0.929247	0.74133	0.352988	0.107239	0.155699	1.96725	3.91021	1.49538	19.0457	0.0019276	0.00596721
MAPK13	mitogen-activated protein kinase 13	0.278279	0.277025	0.309808	0.0163102	0.0908431	0.109574	1.9663	3.90766	0.444048	10.2061	0.0112896	0.023208
KTN1	kinectin 1	69.5988	86.5287	67.3168	38.4698	11.8539	7.81686	1.96596	3.90674	9.68493	14.4858	0.00470142	0.0116246
MRS2	magnesium transporter MRS2	6.61695	7.44999	8.08306	2.20682	1.45204	1.98444	1.96573	3.90611	4.57128	76.1723	1.29734e-05	0.000307378
BCAS2	BCAS2 pre-mRNA processing factor	17.7621	26.52	25.1439	8.17807	4.37879	5.2614	1.96572	3.90608	4.24393	44.7971	0.000100724	0.000851235
RP11-152F13.8		23.2413	25.9394	23.6825	6.69167	5.4969	6.3624	1.96533	3.90503	3.58673	77.1271	1.23466e-05	0.000301749
WDR12	WD repeat domain 12	6.35371	6.95147	5.89504	1.7031	1.34381	1.84915	1.96485	3.90372	5.1934	85.5519	8.1584e-06	0.000263347
CTB-134H23.2		0.405247	0.748315	0.956892	0.23841	0.193146	0.0970708	1.96426	3.90213	-0.606663	11.1564	0.00897822	0.0194038
DUSP9	dual specificity phosphatase 9	14.1228	12.0094	13.2963	5.13769	2.61425	2.33182	1.96356	3.90023	4.51272	42.9511	0.000117794	0.000928636
NUP205	nucleoporin 205	9.57478	10.6603	8.33258	3.53202	1.61326	2.21673	1.9626	3.89763	5.51211	46.2922	8.90824e-05	0.000791914
GNPDA2	glucosamine-6-phosphate deaminase 2	1.41589	1.51766	1.54237	0.443271	0.365761	0.330882	1.96225	3.89669	2.75322	61.4995	3.00897e-05	0.000434579
OXR1	oxidation resistance 1	5.46457	5.48512	3.26465	2.06033	0.951281	0.663761	1.96211	3.89631	4.40309	22.2553	0.00117292	0.00414946
BCAP29	B cell receptor associated protein 29	5.29194	6.96134	4.10991	1.97875	1.20512	1.04331	1.9621	3.8963	4.85881	38.9061	0.000169515	0.00115351
SCML1	Scm polycomb group protein like 1	0.658805	1.0108	0.778351	0.218882	0.273556	0.131506	1.96168	3.89515	1.52979	24.8961	0.000810175	0.00321169
SPDYE1	speedy/RINGO cell cycle regulator family member E1	0.445343	0.407168	0.113745	0.132938	0.0617024	0.0496164	1.96163	3.89501	-0.736982	7.83341	0.0212666	0.0385862
GPX8	glutathione peroxidase 8 (putative)	2.59599	3.04199	3.41193	1.21391	0.532436	0.577657	1.96059	3.8922	2.88085	31.9668	0.000343129	0.00181393
AC108463.2		8.22266	5.83987	8.94377	1.52228	2.73201	1.51509	1.95978	3.89003	0.782856	22.1802	0.0011859	0.00417741
SNORD58B	small nucleolar RNA, C/D box 58B	27.4352	32.6845	40.1746	4.44639	9.41073	11.4507	1.95972	3.88985	0.529063	17.219	0.00262932	0.00753476
C21orf91	chromosome 21 open reading frame 91	0.695231	1.21092	0.715218	0.353001	0.178261	0.14756	1.95955	3.8894	1.81072	20.7147	0.00147827	0.00492027
RP11-419C5.2		2.28627	1.66449	2.38885	0.815171	0.34052	0.456368	1.95922	3.88852	1.22475	24.8634	0.000813744	0.00322114
PDS5B	PDS5 cohesin associated factor B	9.15961	11.0284	9.49403	4.63559	1.69487	1.38776	1.95847	3.88649	6.36117	22.5635	0.00112568	0.00404051
RP11-172F4.2		9.23403	8.33009	8.03101	2.22665	2.60756	1.6621	1.95816	3.88567	1.48983	35.9981	0.00022469	0.00138025
PPP2R2B	protein phosphatase 2 regulatory subunit Bbeta	0.0166199	0.123749	0.082138	0.0222218	0.00990153	0.0248815	1.95811	3.88554	-0.56074	6.2695	0.0342852	0.0570788
LYAR	Ly1 antibody reactive	202.954	236.43	217.608	50.2643	63.1808	53.9848	1.95796	3.88513	8.31694	100.42	4.27e-06	0.000207559
GFM2	GTP dependent ribosome recycling factor mitochondrial 2	61.1262	70.4854	57.4333	19.1935	14.0356	15.3684	1.95783	3.88478	7.37775	97.7349	4.76687e-06	0.000213748
RP4-635E18.9		76.6693	97.8459	72.6969	24.4485	16.5303	22.755	1.95718	3.88303	6.83972	72.7929	1.5531e-05	0.000326099
PLOD2	procollagen-lysine,2-oxoglutarate 5-dioxygenase 2	3.71377	2.81276	3.03044	1.10154	0.538704	0.807925	1.95711	3.88284	3.93197	49.4036	6.97224e-05	0.000689473
USP12	ubiquitin specific peptidase 12	5.52401	5.39813	3.97879	1.86414	1.02569	0.955078	1.95619	3.88037	4.02405	41.21	0.000137266	0.00101512
PRKDC	protein kinase, DNA-activated, catalytic subunit	43.7519	50.5499	33.0274	18.0242	6.42687	8.74265	1.95616	3.88027	8.68811	29.2228	0.000469531	0.00222361
GOLIM4	golgi integral membrane protein 4	99.8756	118.992	111.557	48.765	21.1953	15.8388	1.95614	3.88024	8.32853	27.8958	0.000551092	0.00247179
PDE7A	phosphodiesterase 7A	3.28853	3.65802	2.90962	1.37542	0.374228	0.809845	1.95603	3.87992	3.94426	23.2836	0.00101173	0.00374356
KIAA1109	KIAA1109	1.42068	1.36199	1.02595	0.461625	0.332169	0.186203	1.95585	3.87944	4.03376	33.9134	0.000278257	0.0015845
GTF2H1	general transcription factor IIH subunit 1	12.0827	13.5844	10.6863	3.45523	2.53454	3.36209	1.95557	3.87869	5.72628	82.364	9.49966e-06	0.000275626
KIAA1033	WASH complex subunit 4	3.53187	4.04628	2.9082	1.58968	0.692187	0.443918	1.95537	3.87815	4.08732	21.077	0.00139842	0.00471794
PAXIP1-AS2	PAXIP1 antisense RNA 2	1.28228	0.692374	1.27656	0.384835	0.0989271	0.342506	1.955	3.87715	1.04623	14.8954	0.00404271	0.010388
NRG4	neuregulin 4	2.87931	3.15086	3.29398	1.02662	0.67576	0.692307	1.95444	3.87565	3.30193	60.023	3.30666e-05	0.000454582
ZNF24	zinc finger protein 24	4.02374	3.17859	1.76983	0.813888	0.910582	0.573043	1.95317	3.87224	3.96106	31.5592	0.000358989	0.00186222
ZBTB6	zinc finger and BTB domain containing 6	1.4633	1.48059	1.26218	0.607507	0.270691	0.208066	1.95232	3.86997	1.87814	22.4515	0.00113986	0.0040768
SERBP1P6	SERPINE1 mRNA binding protein 1 pseudogene 6	12.128	8.20618	7.2741	3.49509	2.27988	1.30447	1.95217	3.86956	2.43932	25.1608	0.000781983	0.00313583
RP11-449H3.3		34.6193	37.3043	20.6303	13.1796	5.24263	5.76586	1.95164	3.86815	6.01159	25.6091	0.000736946	0.00301297
ITGAV	integrin subunit alpha V	3.03054	3.69795	1.38343	0.850613	0.573298	0.688303	1.95032	3.86461	3.82191	25.9562	0.00070425	0.00292874
TFAM	transcription factor A, mitochondrial	9.6361	13.2522	7.73429	3.56488	2.19254	2.22143	1.95004	3.86385	5.1809	43.2483	0.000114818	0.000912096
DEPDC1B	DEP domain containing 1B	2.81128	2.68792	3.19835	1.03321	0.532521	0.6734	1.94982	3.86325	2.80004	44.8366	0.000100393	0.000850203
RBM27	RNA binding motif protein 27	18.0594	19.6266	11.0987	6.94618	2.75812	3.06206	1.94964	3.86279	6.07835	26.1845	0.00068372	0.00286164
E2F6	E2F transcription factor 6	5.78116	4.9103	3.61542	1.26996	0.948465	1.46235	1.94956	3.86256	3.61326	48.5991	7.41862e-05	0.000710729
AC005540.3		4.08991	3.23644	1.73769	1.34117	0.569139	0.429055	1.94897	3.86099	0.855314	13.5373	0.00531123	0.0127678
CENPK	centromere protein K	9.02207	12.3097	10.7331	4.48495	1.81948	2.06508	1.94867	3.86018	4.86261	31.9074	0.000345385	0.00182172
BMI1	BMI1 proto-oncogene, polycomb ring finger	4.69531	6.24233	3.96071	1.5485	1.16777	1.15078	1.94825	3.85906	3.75555	49.9951	6.66498e-05	0.000673634
DRAM2	DNA damage regulated autophagy modulator 2	2.85893	2.64559	2.96701	0.748149	0.750055	0.670154	1.94804	3.8585	2.48809	60.827	3.1403e-05	0.000443457
NGLY1	N-glycanase 1	3.0414	3.82745	3.87222	1.17723	0.730281	0.872174	1.94744	3.8569	4.23229	62.1254	2.89277e-05	0.00042844
SHANK2	SH3 and multiple ankyrin repeat domains 2	0.0471902	0.0597329	0.059925	0.0283934	0.0105429	0.00353241	1.94687	3.85536	-0.491802	8.46893	0.0177766	0.0333046
RP11-261C10.4		8.03942	5.69299	4.87776	2.7061	1.33975	0.740662	1.94682	3.85524	0.970612	15.6999	0.0034662	0.00926122
TMEM19	transmembrane protein 19	0.714635	0.664974	0.993839	0.180926	0.191464	0.232967	1.94666	3.85482	1.70857	38.4017	0.000177777	0.00118886
EFCAB10	EF-hand calcium binding domain 10	0.393756	0.494451	0.432446	0.159366	0.101443	0.0764743	1.94638	3.85407	-0.367296	15.4799	0.00361321	0.00954899
TEAD1	TEA domain transcription factor 1	4.18241	6.29269	3.04856	1.22763	1.11945	1.17637	1.94606	3.8532	4.88232	40.7111	0.00014356	0.00104225
NSF	N-ethylmaleimide sensitive factor, vesicle fusing ATPase	9.86681	14.2623	8.85567	2.6737	2.65177	3.23004	1.94602	3.85311	5.12547	53.9672	4.9812e-05	0.000569018
KIZ-AS1	KIZ antisense RNA 1	1.11231	0.767494	1.56984	0.349936	0.269867	0.259203	1.94573	3.85233	1.98475	34.3838	0.000264904	0.00153786
SUMO1	small ubiquitin like modifier 1	48.5695	54.2375	53.0633	18.7278	9.87948	11.9044	1.9449	3.8501	6.14354	61.8366	2.94568e-05	0.000433209
MELK	maternal embryonic leucine zipper kinase	8.82513	9.34901	10.5024	4.25885	1.39782	1.82015	1.94487	3.85003	4.21391	26.4175	0.000663517	0.00280594
ARL14	ADP ribosylation factor like GTPase 14	2.67144	1.97016	5.86785	1.63286	0.303152	0.761788	1.94426	3.8484	1.52151	10.3382	0.0109278	0.0226213
RP11-588L15.2		3.85112	3.67795	4.12466	1.08942	1.02393	0.876734	1.94285	3.84465	1.11225	36.2056	0.000220083	0.0013595
THUMPD3	THUMP domain containing 3	7.38936	8.30971	8.54787	3.18897	1.55985	1.5679	1.94249	3.84369	4.77058	43.3276	0.00011404	0.000909468
DPY19L4	dpy-19 like 4	2.15683	2.49622	1.72273	0.5963	0.568042	0.488088	1.94237	3.84338	3.26793	54.14	4.92061e-05	0.00056588
HNRNPH1	heterogeneous nuclear ribonucleoprotein H1	87.0461	104.008	91.4036	28.1389	20.1622	25.0632	1.94215	3.84277	9.13476	101.924	4.01957e-06	0.000207559
KAT2B	lysine acetyltransferase 2B	1.54853	1.86801	1.41724	0.791732	0.255299	0.221623	1.94132	3.84056	2.53238	16.9111	0.00277691	0.00784021
ZNF354B	zinc finger protein 354B	0.841347	0.636258	0.924016	0.320851	0.139477	0.157721	1.94057	3.83858	0.954694	22.1892	0.00118433	0.00417558
CNOT7	CCR4-NOT transcription complex subunit 7	5.42537	5.14624	4.72767	1.29796	1.15907	1.49834	1.93944	3.83557	5.13401	93.5298	5.6963e-06	0.000226112
RP11-159H22.2		1.25339	0.663644	0.84122	0.391034	0.290393	0.0208493	1.93938	3.83542	-0.0443499	6.96987	0.0274922	0.0476663
PPP4R3B	protein phosphatase 4 regulatory subunit 3B	17.4688	16.2925	13.2925	4.99281	3.68393	3.54697	1.93935	3.83534	6.34143	83.1031	9.16596e-06	0.000271191
COPS5	COP9 signalosome subunit 5	13.8358	14.2645	13.2586	4.908	3.13914	2.72448	1.93906	3.83455	6.07625	65.3854	2.36932e-05	0.000391377
LIFR	LIF receptor subunit alpha	1.6118	1.61163	1.41715	0.34877	0.57312	0.27142	1.93865	3.83348	3.53659	36.0561	0.00022339	0.00137524
DAB1	DAB adaptor protein 1	0.650623	0.515296	0.734512	0.147742	0.18623	0.152364	1.93857	3.83324	1.60942	38.9299	0.000169137	0.0011519
ORC1	origin recognition complex subunit 1	14.478	15.1982	10.4509	6.17227	2.23662	2.16489	1.93777	3.83112	4.7384	22.8283	0.0010795	0.00392327
RP11-96C23.11		1.52943	0.90164	0.969732	0.5397	0.0751492	0.264378	1.9368	3.82855	0.376548	9.94296	0.0120563	0.0244467
ARFGEF2	ADP ribosylation factor guanine nucleotide exchange factor 2	6.64334	7.86692	4.2409	2.40478	1.31564	1.21957	1.93543	3.82493	5.14873	32.8216	0.000312573	0.00170417
HMGB1P21	high mobility group box 1 pseudogene 21	9.96357	7.03194	6.32698	3.53568	1.29409	1.24421	1.93496	3.82367	1.5336	18.156	0.00223603	0.00666417
RP1-239B22.5		0.513875	0.884283	0.700234	0.183223	0.0453554	0.319125	1.93479	3.82322	0.417522	9.57862	0.0132271	0.0262302
CXADR	CXADR Ig-like cell adhesion molecule	1.94206	2.51419	1.60079	0.772961	0.450086	0.36881	1.93442	3.82225	3.10452	31.6873	0.000353909	0.0018499
NPIPB11	nuclear pore complex interacting protein family member B11	4.47273	4.23605	5.81655	1.20107	1.50888	1.03103	1.93345	3.81969	3.74337	57.9592	3.786e-05	0.000487924
RP11-473M20.16		3.44774	5.46198	2.49749	0.784657	1.22369	0.966426	1.93323	3.8191	0.902523	18.3047	0.00218048	0.00653862
PLCB2	phospholipase C beta 2	0.914507	0.902714	1.82426	0.455165	0.0978473	0.393408	1.93313	3.81882	2.49159	13.4758	0.00537954	0.0128977
FRS2	fibroblast growth factor receptor substrate 2	2.12526	2.33783	0.961095	0.717243	0.338545	0.376588	1.93255	3.81728	3.06454	20.6164	0.00150089	0.00497602
EZH2	enhancer of zeste 2 polycomb repressive complex 2 subunit	26.5252	29.5765	29.6645	14.0566	3.39767	5.28264	1.93114	3.81356	6.34709	19.0819	0.00192238	0.00595672
POLN	DNA polymerase nu	0.2132	0.228592	0.25366	0.0608132	0.0508067	0.0680916	1.93109	3.81345	0.24769	23.2644	0.00101448	0.00374947
CYCSP45	CYCS pseudogene 45	6.4451	7.36697	5.93054	2.2359	0.622665	2.29488	1.93082	3.81271	0.453506	14.1041	0.00472949	0.011671
PM20D2	peptidase M20 domain containing 2	3.77613	4.64441	4.85756	1.36508	0.930426	1.17252	1.93072	3.81244	3.72032	63.4369	2.66662e-05	0.0004122
DCUN1D4	defective in cullin neddylation 1 domain containing 4	2.47187	2.1561	1.58459	0.823617	0.35155	0.456787	1.93057	3.81206	3.32234	31.1626	0.000375296	0.00191916
TOMM70	translocase of outer mitochondrial membrane 70	8.08746	9.31328	8.28364	2.27709	1.94185	2.48253	1.93053	3.81195	4.86483	85.7289	8.091e-06	0.000263347
PRKAA1	protein kinase AMP-activated catalytic subunit alpha 1	5.53052	6.3596	3.74628	1.66338	1.11573	1.33176	1.93046	3.81177	4.44082	47.8642	7.85745e-05	0.000731563
CDC27	cell division cycle 27	6.28791	7.36646	5.27203	2.16312	1.47066	1.33861	1.93022	3.81113	4.76932	55.8341	4.372e-05	0.000526905
GBE1	1,4-alpha-glucan branching enzyme 1	1.31048	1.08716	1.00223	0.351859	0.252871	0.279592	1.92987	3.81021	1.90492	43.9295	0.000108339	0.000882596
RP11-261C10.5		9.76441	11.1146	9.72527	4.65141	2.21387	1.18366	1.9287	3.80712	2.17787	18.2724	0.00219239	0.00656468
RP11-29G8.3		23.4624	19.268	16.9694	6.14598	5.00755	4.42779	1.92745	3.80381	5.70894	81.3143	9.99971e-06	0.000277049
RFC3	replication factor C subunit 3	10.5197	10.3489	8.02024	4.18647	1.86539	1.57776	1.92715	3.80303	4.13002	28.0381	0.000541553	0.00244979
FAM208A	transcription activation suppressor	5.50157	5.07368	4.67729	2.37482	0.878475	0.779318	1.92705	3.80277	4.97603	24.1542	0.000896104	0.00343852
DNAJC10	DnaJ heat shock protein family (Hsp40) member C10	2.51777	3.7168	2.23918	1.04472	0.711432	0.487773	1.92704	3.80275	5.29371	34.1128	0.000272498	0.00156492
TNIK	TRAF2 and NCK interacting kinase	18.6861	14.5571	6.5685	6.09097	1.71447	2.77579	1.92703	3.80272	6.1586	14.6906	0.00446709	0.0111932
RP11-118M9.3		2.81227	2.53137	3.84358	1.47065	0.819109	0.0748484	1.92692	3.80243	-0.144134	6.97395	0.0274579	0.047622
CWC27	CWC27 spliceosome associated cyclophilin	39.0695	53.3613	63.6214	16.211	13.6791	10.9206	1.92672	3.80191	6.93685	63.1034	2.72201e-05	0.000417588
H3F3AP4	H3 histone pseudogene 6	14.8858	14.9506	21.3336	4.06991	4.93132	4.23722	1.92649	3.80129	2.15604	43.3425	0.000113894	0.000908749
KIAA1468	RAB11 binding and LisH domain, coiled-coil and HEAT repeat containing	1.51077	1.12637	0.773333	0.367755	0.220585	0.304868	1.92524	3.79799	2.58505	32.8432	0.000311845	0.0017016
NUP153	nucleoporin 153	16.6158	17.0306	9.21418	4.94456	2.94914	3.43842	1.92457	3.79623	5.77101	39.9185	0.000154309	0.00108932
SOS1	SOS Ras/Rac guanine nucleotide exchange factor 1	4.30054	4.00131	4.30349	1.6981	0.797573	0.822969	1.92452	3.7961	4.61546	41.9425	0.000128625	0.000974691
TCERG1	transcription elongation regulator 1	43.6054	44.777	49.9232	15.7406	9.54737	11.0257	1.92442	3.79585	7.98069	87.1664	7.56805e-06	0.000256636
CEP350	centrosomal protein 350	5.51927	6.57986	2.78112	2.14848	1.08349	0.737541	1.92433	3.79562	5.49704	18.9498	0.0019645	0.0060538
EIF4E	eukaryotic translation initiation factor 4E	11.1422	12.1216	12.6119	4.6167	2.61436	2.22373	1.92415	3.79514	6.7273	51.0263	6.1681e-05	0.000647482
EXO1	exonuclease 1	9.21797	10.0343	9.19213	4.75635	1.08966	1.73023	1.92414	3.7951	4.63235	17.4518	0.00253163	0.00732705
XRCC5	X-ray repair cross complementing 5	55.4781	69.2698	61.9827	19.462	11.4352	18.3209	1.92391	3.79449	7.74688	67.4673	2.09537e-05	0.000367271
ZNF614	zinc finger protein 614	1.72267	1.79363	0.839707	0.545224	0.269932	0.339155	1.92203	3.78957	2.43658	22.9203	0.00106537	0.00388462
HOXA2	homeobox A2	0.602727	0.651562	0.318716	0.143268	0.186191	0.0802078	1.92188	3.78917	-0.187062	12.4548	0.00668947	0.0152692
AL135791.1		15.2418	10.8062	11.7584	3.26068	3.54362	3.02761	1.91962	3.78322	1.57631	39.0003	0.000168025	0.00114624
HSP90B2P	heat shock protein 90 beta family member 2, pseudogene	1.38097	1.35728	0.770968	0.34467	0.260532	0.317007	1.91922	3.78219	0.869728	23.1275	0.00103435	0.00380823
STOX2	storkhead box 2	0.094897	0.166606	0.115192	0.0480822	0.0327316	0.0179456	1.91917	3.78205	-0.0967303	13.2278	0.0056663	0.0134329
MTRF1	mitochondrial translation release factor 1	3.20709	2.83362	3.18489	1.2148	0.740438	0.470507	1.91898	3.78156	2.90359	31.8283	0.00034842	0.0018335
LPGAT1	lysophosphatidylglycerol acyltransferase 1	3.34249	3.49169	2.14023	1.0806	0.795049	0.500402	1.91821	3.77954	4.06416	32.9371	0.000308705	0.00169356
ZNF549	zinc finger protein 549	0.682998	0.545974	0.324722	0.139156	0.14092	0.127482	1.91692	3.77615	1.63121	27.4134	0.000585007	0.00257147
RAB18	RAB18, member RAS oncogene family	4.29846	5.61461	4.45452	1.86744	1.02435	0.929309	1.91673	3.77566	4.24293	39.6971	0.000157486	0.00110349
CCDC39	coiled-coil domain containing 39	0.402882	0.794281	0.324999	0.198311	0.11895	0.0896722	1.91651	3.77508	1.35466	15.6489	0.00349961	0.0093361
FAM98B	family with sequence similarity 98 member B	6.27915	6.56933	6.67182	2.39019	1.71776	1.04556	1.9163	3.77453	4.81512	43.5238	0.000112141	0.000898289
EVI5	ecotropic viral integration site 5	1.69398	2.33799	1.32524	0.609901	0.402896	0.412915	1.91623	3.77434	3.24183	36.5799	0.000212063	0.00132759
E2F8	E2F transcription factor 8	4.17493	4.31845	2.86026	1.85008	0.521143	0.666694	1.91608	3.77395	3.31817	17.6652	0.00243224	0.00710179
RP11-93B14.9		1.16907	0.723508	0.150071	0.227364	0.0723628	0.236392	1.91604	3.77387	-0.247171	6.11954	0.036003	0.059549
GPATCH11	G-patch domain containing 11	15.2591	18.3405	13.7827	7.69974	2.53266	2.48879	1.91469	3.77033	5.33873	20.5585	0.00151963	0.00502335
RP11-327E2.5		0.591942	0.628547	0.551176	0.123882	0.183996	0.15412	1.91399	3.7685	-0.222392	17.4743	0.00251426	0.00729232
NPHP3	nephrocystin 3	1.16988	1.06353	1.01569	0.377593	0.201618	0.279528	1.91339	3.76692	2.69571	44.4097	0.000104039	0.000866153
RP11-191G24.1		2.42076	0.274659	2.34211	0.184955	0.54941	0.552243	1.9133	3.76671	-0.828989	5.33692	0.0469438	0.0745613
ASCC3	activating signal cointegrator 1 complex subunit 3	8.15737	11.7576	5.1678	3.06445	2.32405	1.33047	1.91327	3.76661	5.96997	24.1959	0.000890985	0.00342445
GCFC2	GC-rich sequence DNA-binding factor 2	6.5714	7.4639	5.32047	2.09961	1.71674	1.31674	1.91276	3.76528	4.48521	54.8846	4.66964e-05	0.000547212
RP5-872K7.7		5.46233	3.82791	7.79062	1.79778	1.38417	1.2729	1.9126	3.76487	2.00336	33.0076	0.000306374	0.00168639
MDM1	Mdm1 nuclear protein	2.53029	2.77985	3.05496	1.20539	0.43926	0.58201	1.91239	3.76433	3.53209	28.8171	0.00049279	0.00230162
NIPBL	NIPBL cohesin loading factor	16.1603	16.5209	14.9272	6.64733	3.56148	2.48097	1.91163	3.76234	6.97229	35.0611	0.000247036	0.00146759
IQCB1	IQ motif containing B1	27.0573	28.0214	25.3875	9.62485	4.87829	6.89715	1.9114	3.76173	5.69181	57.9137	3.79749e-05	0.000489017
PSMA3	proteasome 20S subunit alpha 3	22.7293	27.5916	30.0827	10.0204	6.86499	4.45628	1.91083	3.76027	5.72266	42.5602	0.000121853	0.000946731
RPAP2	RNA polymerase II associated protein 2	1.82293	2.20032	1.06342	0.606029	0.398564	0.356532	1.91001	3.75812	4.21421	31.63	0.000356172	0.00185814
FAM73A	mitoguardin 1	0.915079	1.04928	0.524481	0.321174	0.136293	0.208919	1.90964	3.75715	2.3564	22.2797	0.00116874	0.00414222
HSPD1	heat shock protein family D (Hsp60) member 1	163.842	201.835	159.634	58.243	35.108	46.7527	1.90958	3.75698	8.87984	71.6001	1.65793e-05	0.000335074
RAD17	RAD17 checkpoint clamp loader component	13.7341	13.8156	13.1275	4.21953	3.66278	2.87581	1.90939	3.7565	5.15563	83.1809	9.13169e-06	0.000271191
TFAP2E	transcription factor AP-2 epsilon	0.589061	0.2389	0.798353	0.134062	0.194138	0.0900643	1.90869	3.75469	-0.313993	10.4964	0.0105126	0.0219404
KRTAP5-AS1	KRTAP5-1/KRTAP5-2 antisense RNA 1	0.365054	0.401447	0.113081	0.120148	0.0223063	0.0896853	1.90849	3.75416	-0.717553	6.75026	0.0294253	0.0503899
PIBF1	progesterone immunomodulatory binding factor 1	5.19934	5.21814	5.83774	2.44264	1.07608	0.818951	1.90727	3.75099	3.86576	25.9862	0.000701511	0.00292196
RP11-178H8.7		1.97582	1.32729	2.31335	0.903102	0.331877	0.250191	1.9067	3.7495	1.90863	16.082	0.00322805	0.00875426
CEP57	centrosomal protein 57	13.0473	11.2907	11.8894	6.14116	2.04859	1.53626	1.90625	3.74833	5.75605	17.9974	0.00230424	0.00681433
DCAF6	DDB1 and CUL4 associated factor 6	18.6251	18.8301	19.7815	4.70488	4.46337	5.95058	1.90619	3.74818	6.24669	95.545	5.22549e-06	0.000221704
BTBD8	BTB domain containing 8	0.52645	0.237567	0.481815	0.18344	0.0950426	0.0477663	1.90556	3.74654	0.886153	13.1801	0.00572359	0.0135352
ASNSD1	asparagine synthetase domain containing 1	12.863	13.7447	8.43522	4.80508	2.87212	1.71903	1.90526	3.74576	4.21878	25.3075	0.00076689	0.0030936
RP11-347C12.1		5.75391	5.98775	7.61093	1.7883	1.69671	1.62334	1.90521	3.74563	4.40516	83.107	9.16421e-06	0.000271191
CCDC68	coiled-coil domain containing 68	1.00101	1.3629	0.95977	0.419231	0.31554	0.15224	1.90467	3.74423	1.89014	21.7795	0.00125815	0.00436279
FPGT-TNNI3K	FPGT-TNNI3K readthrough	0.111406	0.146692	0.128792	0.056447	0.0279461	0.0175564	1.90447	3.74373	-0.277383	12.4667	0.00667214	0.0152382
RP11-196G18.22		1.29692	1.92049	0.938473	0.622318	0.252738	0.246783	1.90416	3.74291	2.02234	17.2651	0.0026081	0.00749109
SLC35B3	solute carrier family 35 member B3	9.34621	7.46374	7.88171	2.47183	2.46283	1.58373	1.90386	3.74214	3.47685	53.6074	5.11031e-05	0.000576441
ZNF567	zinc finger protein 567	1.0628	0.81642	0.784527	0.273334	0.262959	0.166935	1.90203	3.73739	1.43674	30.9382	0.000384927	0.00195064
SPDYE2B	speedy/RINGO cell cycle regulator family member E2B	1.56243	1.7194	0.596221	0.665671	0.141993	0.237875	1.90202	3.73737	0.822285	9.01844	0.0153158	0.0295274
PHF3	PHD finger protein 3	29.5527	26.1306	29.1235	12.6371	6.0258	4.06219	1.90173	3.73661	7.52995	28.5225	0.00051057	0.0023496
SETD7	SET domain containing 7, histone lysine methyltransferase	8.58189	9.64375	4.11388	1.79249	2.05545	2.12036	1.90137	3.73567	6.04689	32.6969	0.000316816	0.00171722
RNF13	ring finger protein 13	2.7322	2.52664	2.32924	0.912274	0.593544	0.51525	1.90107	3.73489	2.5529	42.2953	0.000124703	0.000957899
TATDN2P2	TatD DNase domain containing 2 pseudogene 2	1.39271	1.39489	0.243647	0.1582	0.352452	0.295224	1.901	3.73471	0.583418	7.65333	0.0224071	0.0402872
MRPL42	mitochondrial ribosomal protein L42	2.10036	2.09549	2.59899	0.696374	0.616189	0.489079	1.90063	3.73375	4.55149	75.5199	1.34243e-05	0.000310889
ECHDC1	ethylmalonyl-CoA decarboxylase 1	27.9281	37.3931	25.5248	10.1456	7.93355	6.30781	1.9006	3.73367	6.77405	55.982	4.32776e-05	0.000525068
TLDC2	TBC/LysM-associated domain containing 2	0.569552	0.358466	1.02679	0.252885	0.192068	0.0643527	1.90043	3.73325	0.141109	10.1108	0.0115601	0.0236208
ZNF160	zinc finger protein 160	1.21526	1.25193	1.28511	0.406867	0.230454	0.362906	1.90033	3.73297	2.76223	46.4342	8.80653e-05	0.000787073
CYP4F26P	cytochrome P450 family 4 subfamily F member 26, pseudogene	1.25473	1.03486	1.11302	0.464583	0.172506	0.260093	1.90026	3.73279	-0.19078	14.7512	0.0041582	0.0106153
SPG20	spartin	22.8219	29.6857	26.2295	8.65176	7.11429	5.29892	1.89972	3.73141	6.73279	65.7263	2.32158e-05	0.00038957
FERMT2	FERM domain containing kindlin 2	6.12537	6.64443	5.14103	1.91043	1.25228	1.63327	1.89948	3.73079	5.01182	67.9186	2.0412e-05	0.00036318
TRIQK	triple QxxK/R motif containing	0.881322	0.374287	0.93207	0.384066	0.11668	0.0781879	1.89935	3.73046	1.64107	10.3747	0.0108302	0.0224594
RP11-178C3.1		3.42227	4.96043	4.57289	1.89133	0.679624	0.888067	1.89902	3.7296	0.462096	15.58	0.00354538	0.00940792
ZZZ3	zinc finger ZZ-type containing 3	7.19687	8.40333	5.21137	2.59972	1.72377	1.28034	1.89865	3.72863	5.31455	38.1194	0.000182617	0.00121231
MTERF1	mitochondrial transcription termination factor 1	1.30724	1.69772	1.18922	0.528111	0.421158	0.174708	1.8981	3.72722	2.13974	20.4611	0.00153752	0.005063
ICE2	interactor of little elongation complex ELL subunit 2	1.54569	1.66178	1.49996	0.586557	0.369574	0.305803	1.89745	3.72554	3.99638	48.2108	7.64662e-05	0.000720659
BMPR1A	bone morphogenetic protein receptor type 1A	0.902999	1.17069	0.890962	0.408052	0.146721	0.245795	1.89719	3.72488	2.8467	25.9771	0.000702346	0.00292306
TMX3	thioredoxin related transmembrane protein 3	4.24982	4.59217	1.95297	1.28344	0.950263	0.684103	1.89291	3.71383	4.13637	24.7503	0.000826229	0.00325867
LRRCC1	leucine rich repeat and coiled-coil centrosomal protein 1	5.34621	5.6851	11.1898	4.23535	1.21337	0.557913	1.89179	3.71095	4.56034	8.59509	0.0178833	0.0334429
SMARCA5	SWI/SNF related, matrix associated, actin dependent regulator of chromatin, subfamily a, member 5	30.9002	30.9265	37.7922	12.5644	7.8947	6.29738	1.891	3.70892	7.4571	55.9764	4.32942e-05	0.000525068
ATP5F1	ATP synthase peripheral stalk-membrane subunit b	35.9829	40.3459	48.3805	12.3179	11.3057	9.70311	1.89085	3.70854	6.47401	91.4419	6.24028e-06	0.000233433
CLTC	clathrin heavy chain	16.5084	20.1668	13.8715	5.71997	3.85562	4.09204	1.89048	3.7076	6.9883	63.7493	2.61599e-05	0.000410137
GLRX	glutaredoxin	2.16683	2.46088	2.0325	0.369758	0.642948	0.762389	1.88976	3.70573	3.20676	33.26	0.000298202	0.00165886
RP11-62J1.3		4.39496	5.33106	3.4519	1.85194	0.666493	1.05275	1.88897	3.70371	1.55616	20.1765	0.00160751	0.00522683
SCRN3	secernin 3	2.03248	2.98135	1.82502	1.041	0.473309	0.348883	1.88892	3.70358	2.60637	19.1224	0.00190356	0.00591302
ZNF823	zinc finger protein 823	1.20496	0.744339	0.857734	0.429631	0.13294	0.187075	1.88884	3.70337	0.597462	14.6179	0.00426864	0.0108208
RP11-293I14.2		1.20985	1.61091	1.32873	0.380625	0.381594	0.340944	1.88877	3.70318	-0.437966	15.9089	0.00333333	0.00898736
RP11-271C24.2		49.4377	48.3255	25.6561	17.9176	9.38621	6.1813	1.88843	3.70231	2.99818	19.2939	0.00185107	0.00579421
FAM117B	family with sequence similarity 117 member B	2.30995	2.41885	0.921144	0.598101	0.458729	0.472073	1.88822	3.70179	2.85948	22.6299	0.00111078	0.0040018
ACTR2	actin related protein 2	27.1449	27.7521	23.4283	9.89007	5.39192	5.91105	1.88772	3.7005	6.16999	56.1506	4.27799e-05	0.000523162
LINC01122	long intergenic non-protein coding RNA 1122	0.901953	0.649438	0.625914	0.16433	0.236199	0.178063	1.8863	3.69685	1.37895	29.9547	0.000430892	0.0020955
MSH6	mutS homolog 6	43.9168	39.4485	31.0766	16.188	6.54512	8.37229	1.88626	3.69675	8.05372	35.2005	0.000243544	0.00145208
CAB39L	calcium binding protein 39 like	0.378152	0.391743	0.343081	0.0937952	0.117543	0.0853296	1.88603	3.69616	0.310014	21.8519	0.0012447	0.0043337
TDRD3	tudor domain containing 3	3.82499	3.66465	4.52362	1.51597	0.930708	0.786019	1.88599	3.69606	4.11104	48.3767	7.54819e-05	0.000716396
UGT1A1	UDP glucuronosyltransferase family 1 member A1	3.24899	4.76328	4.64072	2.33219	0.453722	0.684092	1.88579	3.69554	3.58786	12.3546	0.00685267	0.0155653
PPP1R2P3	PPP1R2 family member B	3.00396	2.72507	2.93591	1.0465	0.492565	0.792168	1.88534	3.69441	1.88616	32.8674	0.000311032	0.00170003
MAPK6	mitogen-activated protein kinase 6	12.0426	13.5384	9.98076	4.90634	2.89644	1.87234	1.88404	3.69107	5.59115	31.7238	0.000352479	0.00184598
CEP290	centrosomal protein 290	5.04705	5.86483	4.93964	2.29108	1.15806	0.866694	1.88393	3.69078	5.12604	31.1253	0.000376875	0.0019224
MASTL	microtubule associated serine/threonine kinase like	4.00459	4.1677	3.40228	1.43862	0.738246	0.959239	1.8838	3.69047	3.16211	41.588	0.00013272	0.000994607
HSPA4L	heat shock protein family A (Hsp70) member 4 like	5.0569	6.84571	6.00234	2.54547	1.26023	1.07728	1.88326	3.68907	5.46484	33.1631	0.000301307	0.00167043
UBA3	ubiquitin like modifier activating enzyme 3	2.88651	2.79402	3.11877	1.5009	0.398075	0.496158	1.88287	3.68809	2.93978	17.0819	0.00269382	0.00766986
AC009302.2		3.51734	4.86077	3.70843	1.05345	1.34112	0.842525	1.88261	3.6874	0.0853518	17.6733	0.00242883	0.00709641
KDM3A	lysine demethylase 3A	3.06993	2.31808	2.26942	0.793612	0.608841	0.656043	1.8821	3.6861	4.43935	74.6679	1.40426e-05	0.000313971
SRSF10	serine and arginine rich splicing factor 10	18.8953	19.8645	13.1847	6.67335	3.75026	3.72803	1.88192	3.68566	6.82356	44.3536	0.000104531	0.000868089
POLR2B	RNA polymerase II subunit B	18.2994	23.7227	22.9212	6.43517	5.35137	5.76318	1.88178	3.68529	6.34317	89.1733	6.90554e-06	0.000247036
RNPC3	RNA binding region (RNP1, RRM) containing 3	0.990816	1.00904	0.921436	0.269231	0.295147	0.220109	1.88151	3.68461	2.10506	44.6577	0.000101902	0.000854536
AP1AR	adaptor related protein complex 1 associated regulatory protein	12.8652	12.7075	13.3245	5.10405	3.04688	2.3852	1.88116	3.68371	4.82363	45.8293	9.25008e-05	0.00081102
SNX18P3	sorting nexin 18 pseudogene 3	1.50388	1.45674	0.432206	0.330746	0.234456	0.353498	1.88083	3.68288	0.558133	11.6953	0.00792639	0.0174845
PSMD12	proteasome 26S subunit, non-ATPase 12	16.5972	22.8194	16.8574	5.10439	4.6134	5.53767	1.88059	3.68225	6.00497	69.5778	1.85631e-05	0.000352671
CH17-360D5.3		7.60613	10.9608	1.75095	3.19752	1.26644	1.15363	1.87995	3.68062	1.87474	7.90017	0.0208892	0.0380158
APC	APC regulator of WNT signaling pathway	2.37081	2.40141	1.23043	0.828015	0.525561	0.285266	1.87909	3.67843	3.99353	20.3093	0.00157438	0.0051479
TTC21B	tetratricopeptide repeat domain 21B	1.15739	1.07965	1.1392	0.486637	0.186477	0.244106	1.87799	3.67562	2.44095	27.1468	0.000604847	0.00262501
ANKRD18A	ankyrin repeat domain 18A	3.99914	4.54858	3.07957	1.57162	0.826032	0.780722	1.87728	3.67381	3.71738	33.5496	0.000289152	0.00162326
LHX4	LIM homeobox 4	0.787614	0.523081	0.92963	0.101678	0.237313	0.254801	1.8772	3.67361	1.54066	18.9529	0.00195723	0.0060394
LMLN	leishmanolysin like peptidase	0.886942	1.38379	0.752234	0.479424	0.157959	0.196576	1.87672	3.6724	2.50353	16.7024	0.00288269	0.00805797
RABL3	RAB, member of RAS oncogene family like 3	2.44246	2.23293	2.38655	0.80821	0.656031	0.441948	1.87665	3.6722	2.81537	44.2911	0.000105081	0.000870817
SNORA40	small nucleolar RNA, H/ACA box 40	1.09491	1.3044	1.7522	0.546546	0.397597	0.174846	1.87577	3.66998	1.24192	17.5396	0.00248585	0.00722925
RP11-613D13.5		0.407866	0.426405	0.566784	0.115746	0.148771	0.109661	1.87553	3.66937	0.0509738	18.9044	0.00197292	0.00607399
MKLN1	muskelin 1	1.4998	1.79437	1.01544	0.537793	0.35538	0.28577	1.87542	3.66908	3.57009	32.2182	0.000333776	0.00177603
TNXA	tenascin XA (pseudogene)	2.34236	1.36319	0.842721	0.532781	0.449125	0.241843	1.87528	3.66874	1.01458	14.7724	0.004141	0.010578
RP11-96C23.13		0.776128	0.387053	0.422891	0.270294	0.0358442	0.122499	1.87519	3.66849	0.663665	8.80825	0.0162039	0.0309059
DDI2	DNA damage inducible 1 homolog 2	3.25307	2.83861	1.89684	0.974498	0.587212	0.614607	1.87509	3.66824	4.36384	40.9592	0.000140386	0.00103024
RP11-159F24.3		1.53344	1.46941	2.05022	0.677493	0.278043	0.399252	1.87498	3.66797	-0.0915338	15.1479	0.00384988	0.0100135
SESN1	sestrin 1	1.25899	1.55093	1.17676	0.401139	0.178738	0.506897	1.87473	3.66733	2.1364	22.1881	0.00118452	0.00417558
DICER1	dicer 1, ribonuclease III	5.38707	6.79796	2.91163	2.03614	1.07956	1.05305	1.87241	3.66143	5.31204	24.3277	0.000875037	0.00338446
ZDBF2	zinc finger DBF-type containing 2	1.70342	1.74486	1.00242	0.732235	0.31615	0.177957	1.87133	3.6587	3.29894	14.9926	0.0039671	0.0102465
TAF7	TATA-box binding protein associated factor 7	120.098	104.367	112.723	33.5385	22.7377	35.2115	1.87086	3.6575	7.5978	87.4522	7.46908e-06	0.000254873
CD46	CD46 molecule	6.15938	5.41238	5.53969	1.79622	1.43403	1.41501	1.86946	3.65395	4.97815	94.4695	5.47054e-06	0.000225287
WDR89	WD repeat domain 89	4.08664	4.22688	5.44592	1.82899	0.977947	0.942032	1.8692	3.65329	3.22868	37.2687	0.000198216	0.00127072
PAPD4	terminal nucleotidyltransferase 2	2.48053	2.38547	2.60938	1.11886	0.403579	0.524972	1.86909	3.65303	3.13022	26.7341	0.000637222	0.00272519
CACYBPP2	calcyclin binding protein pseudogene 2	12.5846	11.8108	13.2878	5.45371	2.50719	2.32626	1.86856	3.65168	2.44764	27.8012	0.000557549	0.00248789
HECTD1	HECT domain E3 ubiquitin protein ligase 1	11.9337	13.4049	8.71991	4.6507	2.65539	2.07508	1.86848	3.65147	6.50824	34.6508	0.000257676	0.0015087
PHLPP2	PH domain and leucine rich repeat protein phosphatase 2	1.8908	1.64037	0.930965	0.443963	0.324466	0.449756	1.86814	3.65061	3.57209	34.5147	0.000261332	0.00152626
GUF1	GTP binding elongation factor GUF1	3.27079	3.11875	3.33511	0.737937	0.851376	1.0402	1.86799	3.65023	3.20386	56.9033	4.06423e-05	0.000508091
NSA2	NSA2 ribosome biogenesis factor	141.644	169.957	156.314	50.927	39.0408	37.9972	1.86682	3.64727	8.9442	96.6947	4.97826e-06	0.000219003
SRPX	sushi repeat containing protein X-linked	0.497065	0.921152	0.697546	0.147691	0.0658076	0.363808	1.86658	3.64667	-0.0656623	8.54912	0.0173885	0.0327356
NUP50	nucleoporin 50	14.9215	17.7057	12.2328	4.09604	3.52916	4.64949	1.8664	3.64621	6.31224	66.5756	2.20767e-05	0.000377064
HMGB1P20	high mobility group box 1 pseudogene 20	4.61982	3.81399	2.6704	1.82059	0.820869	0.388283	1.86629	3.64595	0.727461	11.5017	0.00828576	0.0181444
ETF1	eukaryotic translation termination factor 1	55.5144	56.1624	33.8638	13.9683	12.2418	13.6404	1.86476	3.64207	7.15463	58.7678	3.58863e-05	0.000476445
FASTKD2	FAST kinase domains 2	1.57056	1.83343	1.45227	0.622743	0.333406	0.378367	1.86451	3.64144	2.66291	36.401	0.000215851	0.00134356
ANKRD28	ankyrin repeat domain 28	5.46709	6.12181	4.7751	2.48282	1.06686	0.97911	1.86371	3.63944	5.29494	28.3947	0.000518532	0.0023715
IFT81	intraflagellar transport 81	3.97527	2.65022	4.17231	1.87681	0.634665	0.450309	1.86352	3.63893	3.99409	15.4332	0.00364537	0.00961524
LHFPL2	LHFPL tetraspan subfamily member 2	2.01542	2.04457	1.76774	0.47825	0.278665	0.836188	1.86337	3.63855	3.31012	23.9552	0.000921036	0.00350028
RP11-140H17.1		0.895243	1.41754	1.16989	0.315159	0.270053	0.366451	1.86321	3.63817	0.891929	23.9922	0.000916343	0.00348851
DSN1	DSN1 component of MIS12 kinetochore complex	10.5274	8.15023	14.1029	5.04638	1.49187	2.44729	1.86263	3.6367	4.24106	21.1782	0.00137707	0.00466386
RP11-20I23.13		1.30252	0.980044	0.978767	0.293315	0.261389	0.32842	1.8626	3.63662	0.528633	23.9808	0.000917782	0.00349199
FMR1	FMRP translational regulator 1	12.2801	14.8519	11.524	5.15312	2.58868	2.94449	1.86246	3.63628	6.18256	44.6007	0.000102388	0.000857733
RP11-646I6.6		6.02595	7.76256	5.43433	2.82981	1.6345	0.821462	1.86212	3.63543	1.23467	16.1202	0.00320535	0.00871369
C2orf48	ribonucleotide reductase regulatory subunit M2	4.1941	2.77396	3.43083	0.727079	1.20627	0.866064	1.86211	3.63539	2.07654	32.7226	0.000315938	0.00171628
NKRF	NFKB repressing factor	8.64031	12.6689	6.85547	2.41131	2.27784	3.0692	1.86202	3.63517	4.59678	38.565	0.00017505	0.00118033
CWC22	CWC22 spliceosome associated protein homolog	36.7949	42.7828	40.2834	16.8449	8.84122	7.40403	1.86157	3.63403	6.40237	39.1417	0.000165817	0.00113547
UGT1A6	UDP glucuronosyltransferase family 1 member A6	2.83886	4.32848	4.06012	2.12448	0.410202	0.602617	1.86049	3.63131	3.63543	11.7014	0.00793107	0.0174924
GRAMD1B	GRAM domain containing 1B	4.59549	6.65829	6.55941	0.391394	2.67454	1.72232	1.86043	3.63116	5.72426	9.92161	0.0127127	0.0254396
IARS2	isoleucyl-tRNA synthetase 2, mitochondrial	28.1269	33.5006	40.5339	9.58242	8.06063	10.2875	1.8588	3.62705	6.49374	79.829	1.07637e-05	0.000283498
AC091878.1		1.89369	1.63367	2.86864	0.598698	0.433494	0.703871	1.85875	3.62694	2.00709	31.4436	0.000363653	0.00187851
ATG5	autophagy related 5	4.84297	4.81486	4.16705	2.10069	0.884148	0.84131	1.85872	3.62687	4.02863	27.7979	0.000557776	0.00248789
UHRF1BP1L	UHRF1 binding protein 1 like	5.08812	5.72571	3.83924	2.26661	0.943738	0.864174	1.85871	3.62683	4.37169	23.9915	0.000916427	0.00348851
USP49	ubiquitin specific peptidase 49	1.16564	1.32881	0.582147	0.376198	0.200552	0.276804	1.85787	3.62471	2.85669	23.0519	0.00104555	0.00383642
LIN9	lin-9 DREAM MuvB core complex component	2.19259	3.06831	2.46908	1.19578	0.463634	0.488217	1.85779	3.62452	2.8824	22.3248	0.00116107	0.00412851
CCNL1	cyclin L1	15.2341	13.5957	17.7838	4.40075	3.58394	4.73171	1.85748	3.62374	6.42462	95.5587	5.22246e-06	0.000221704
RP1-80N2.3		0.82512	0.216258	0.56184	0.335385	0.0393262	0.0592935	1.85747	3.62371	0.239776	5.52784	0.0439285	0.0704874
RP11-463I20.1		1.61384	1.77182	3.00615	0.913894	0.452455	0.37899	1.85724	3.62315	1.26199	18.0972	0.00225848	0.00671315
INTS10	integrator complex subunit 10	8.81889	10.4491	9.55821	2.52918	2.22723	3.15238	1.85713	3.62287	5.39652	72.6945	1.56144e-05	0.000326099
CDCA2	cell division cycle associated 2	12.2925	10.8307	11.4109	3.69455	2.24178	3.53977	1.85674	3.62188	4.83794	65.4231	2.36398e-05	0.000391377
SOX5	SRY-box transcription factor 5	0.117337	0.13243	0.152605	0.0726635	0.0220753	0.0147928	1.85504	3.61763	-0.288062	9.10654	0.0149615	0.0289812
MRPL39	mitochondrial ribosomal protein L39	15.6511	20.8537	26.8389	7.48951	5.48013	4.43959	1.85498	3.61746	4.01302	41.5244	0.000133472	0.000997487
YTHDF3	YTH N6-methyladenosine RNA binding protein 3	5.85831	6.21021	3.09474	1.69039	1.21997	1.29024	1.85452	3.61632	4.32273	34.8715	0.000251884	0.00148709
THAP12	THAP domain containing 12	5.89749	6.2941	4.1568	1.69385	1.46379	1.35227	1.85428	3.61572	4.75311	58.377	3.6824e-05	0.000480688
CYB5R4	cytochrome b5 reductase 4	1.43796	1.71649	1.22588	0.569562	0.305355	0.341032	1.85303	3.61257	3.17873	36.3653	0.000216617	0.0013473
ZNF426	zinc finger protein 426	1.0545	1.33424	1.13415	0.595091	0.207968	0.178555	1.85287	3.61219	2.51516	17.0788	0.00269527	0.00766986
UBR1	ubiquitin protein ligase E3 component n-recognin 1	1.96755	2.48887	1.14721	0.69168	0.510368	0.357445	1.85264	3.61161	3.58214	25.157	0.000782383	0.00313666
CEBPZOS	CEBPZ opposite strand	10.3714	10.4287	12.4231	3.32315	2.4841	3.31522	1.85258	3.61146	5.04812	83.3243	9.06887e-06	0.000271191
RP11-518L10.5		1.45296	3.05462	2.48745	0.959921	0.254594	0.71654	1.85251	3.61127	0.0258248	10.4428	0.010651	0.0221725
IGSF8	immunoglobulin superfamily member 8	25.4453	10.4787	25.5857	8.41211	4.06101	4.31014	1.85246	3.61115	5.05898	23.9515	0.000921512	0.00350127
PSMD14	proteasome 26S subunit, non-ATPase 14	14.7369	19.4799	15.7974	5.87076	3.84737	4.15746	1.8524	3.611	6.35953	64.0113	2.57443e-05	0.00040882
FLVCR2	FLVCR heme transporter 2	0.346221	0.525559	0.208519	0.119463	0.0665376	0.113697	1.85111	3.60777	0.261566	13.0057	0.00593923	0.0139318
TPD52	tumor protein D52	54.76	48.2472	36.5674	16.1463	10.9232	11.5488	1.8501	3.60526	7.9247	67.2289	2.12469e-05	0.000369088
AOC3	amine oxidase copper containing 3	0.345669	0.281763	0.213128	0.0259471	0.101162	0.101684	1.84967	3.60417	-0.199761	9.66435	0.0129394	0.0257726
ITGB1	integrin subunit beta 1	52.3328	48.9533	37.3592	16.5112	11.1051	10.8344	1.84827	3.60067	7.46911	65.1663	2.40065e-05	0.000393508
ALG10B	ALG10 alpha-1,2-glucosyltransferase B	0.467278	0.439637	0.410554	0.240941	0.0628158	0.0631397	1.84816	3.6004	1.70567	12.9719	0.00598209	0.0140061
RP11-787I22.3		3.1951	3.55266	2.99438	0.592391	0.406086	1.68374	1.84784	3.59961	0.482033	10.9955	0.00932529	0.0199537
RBM34	RNA binding motif protein 34	37.7466	44.9792	41.9685	16.2144	10.2281	8.24364	1.84702	3.59755	6.3685	50.2447	6.54032e-05	0.000666604
CENPQ	centromere protein Q	17.3667	20.0671	16.9345	6.84123	4.03672	4.24714	1.84683	3.5971	4.33038	51.4171	5.99175e-05	0.00063536
CWF19L2	CWF19 like cell cycle control factor 2	11.2085	12.2669	12.1668	5.76106	2.75687	1.43142	1.84683	3.59709	4.76358	19.0862	0.00191487	0.00594023
NCL	nucleolin	1562.01	1959.68	1396.26	601.891	351.71	419.72	1.84681	3.59703	12.8288	57.2638	3.9665e-05	0.000501035
POLG2	DNA polymerase gamma 2, accessory subunit	10.8429	12.4641	7.84401	3.23085	2.45078	2.97744	1.84674	3.59686	4.49804	52.0064	5.73737e-05	0.000619166
FAM135A	family with sequence similarity 135 member A	1.26437	1.25009	0.853649	0.512706	0.246973	0.179978	1.84657	3.59644	2.93645	21.6487	0.00128292	0.0044251
ETAA1	ETAA1 activator of ATR kinase	7.28773	5.31615	11.3315	3.67037	1.51915	1.41388	1.84649	3.59623	4.13549	20.8192	0.00145467	0.00486594
LEO1	LEO1 homolog, Paf1/RNA polymerase II complex component	61.7113	68.3946	85.7253	27.3854	14.6061	17.9072	1.8458	3.59453	6.93717	54.6798	4.73706e-05	0.000552305
TTC26	tetratricopeptide repeat domain 26	5.7406	6.48589	4.43014	2.54776	1.02667	1.09769	1.84541	3.59356	4.15562	25.3388	0.000763716	0.00308691
SLC4A5	solute carrier family 4 member 5	0.157261	0.211787	0.285352	0.0731369	0.0611026	0.0450396	1.84515	3.59291	0.232448	17.2378	0.00262063	0.00751648
CASC19	cancer susceptibility 19	12.6337	6.76844	7.22486	2.63876	2.40498	2.23832	1.84493	3.59235	1.08931	24.4854	0.000856419	0.00334211
SBK3	SH3 domain binding kinase family member 3	1.38981	0.7311	1.9823	0.444054	0.43013	0.237792	1.84418	3.59048	0.457405	14.2682	0.0045759	0.0113887
CYP21A2	cytochrome P450 family 21 subfamily A member 2	0.990271	0.595489	0.818269	0.272378	0.31465	0.0677727	1.84413	3.59037	0.622993	11.2483	0.00878713	0.0190729
EPRS	glutamyl-prolyl-tRNA synthetase 1	60.3575	76.0978	79.0205	24.08	20.7176	14.9461	1.84407	3.59023	7.96445	66.8016	2.17851e-05	0.000374385
CENPJ	centromere protein J	15.3414	14.0253	18.964	4.6453	4.80899	3.82746	1.84354	3.58891	5.89332	85.2942	8.25782e-06	0.000263347
NUPL2	nucleoporin 42	4.14105	4.29704	2.93304	1.72743	0.539091	0.925697	1.84309	3.58778	3.41191	21.3143	0.00134898	0.00459539
IL6ST	interleukin 6 cytokine family signal transducer	1.62096	3.23609	0.894979	0.919041	0.49253	0.226317	1.84303	3.58762	3.54161	9.7803	0.01277	0.0255133
SNRPB2	small nuclear ribonucleoprotein polypeptide B2	11.6497	13.7282	13.2105	2.93799	3.74925	3.95764	1.84248	3.58625	4.42397	62.7718	2.77848e-05	0.00042021
GPRASP1	G protein-coupled receptor associated sorting protein 1	0.289931	0.355714	0.123565	0.11109	0.0515614	0.0518272	1.84176	3.58447	0.146691	10.5455	0.0103878	0.0217344
BORA	BORA aurora kinase A activator	3.31219	2.52128	3.18411	1.36194	0.635552	0.504881	1.84152	3.58386	2.61808	24.3397	0.000873606	0.00338322
SLC30A6	solute carrier family 30 member 6	1.01424	1.14184	0.807577	0.395983	0.259827	0.170062	1.84113	3.58291	1.79999	24.177	0.000893301	0.00343011
VAMP7	vesicle associated membrane protein 7	7.08769	8.44379	6.04427	2.46477	1.49538	2.06982	1.84055	3.58146	3.62616	45.6273	9.40431e-05	0.000819892
CEP57L1	centrosomal protein 57 like 1	2.764	2.34259	3.32602	1.16344	0.559062	0.61814	1.84055	3.58145	3.52602	35.8964	0.000226993	0.00138692
CTD-2336O2.3		0.649137	1.28403	0.295929	0.0524039	0.218906	0.352055	1.83966	3.57926	0.187516	5.75703	0.0406222	0.0659822
CCSAP	centriole, cilia and spindle associated protein	1.97124	1.55516	1.39517	0.674732	0.313172	0.38299	1.8396	3.57912	2.72257	31.1276	0.00037678	0.0019224
AC084219.2		0.393389	0.650912	1.08811	0.311696	0.173605	0.1047	1.83731	3.57343	0.817483	12.006	0.00738884	0.0165142
MEGF9	multiple EGF like domains 9	0.514029	0.819966	0.746337	0.34481	0.145335	0.0939112	1.83673	3.57201	1.5149	14.2321	0.00460909	0.0114461
PREPL	prolyl endopeptidase like	2.19401	2.91847	1.94024	0.521918	0.862054	0.576323	1.83532	3.56851	3.62948	34.2015	0.000269983	0.00155737
AMH	anti-Mullerian hormone	0.943848	0.909656	1.31612	0.0680622	0.379087	0.419146	1.83525	3.56833	0.847871	9.28743	0.0142655	0.0278885
VPS36	vacuolar protein sorting 36 homolog	4.11968	5.76374	4.13268	1.82433	1.24611	0.87209	1.83491	3.56748	4.07945	34.1037	0.000272757	0.00156492
JKAMP	JNK1/MAPK8 associated membrane protein	1.43798	1.42008	1.68318	0.688117	0.323142	0.256825	1.83482	3.56728	2.08843	22.9438	0.0010618	0.00387334
RP11-153M3.1		1.48299	1.72832	1.55789	0.517265	0.384135	0.424728	1.83452	3.56652	0.841193	27.2025	0.000600632	0.00261264
RP13-383K5.4		1.48177	1.92576	1.97257	0.624386	0.535023	0.322669	1.83446	3.56639	-0.393858	13.8756	0.00495405	0.0121004
PHKB	phosphorylase kinase regulatory subunit beta	2.30909	2.30854	3.30314	0.97804	0.671938	0.553107	1.8343	3.56598	4.31357	47.1187	8.33559e-05	0.000760103
ZUFSP	zinc finger containing ubiquitin peptidase 1	8.23263	7.06358	9.7676	4.35331	1.52619	1.16291	1.83224	3.5609	3.82217	17.0643	0.00270223	0.00768687
CRNKL1	crooked neck pre-mRNA splicing factor 1	12.1587	12.5385	15.2865	3.85542	3.85092	3.39593	1.83221	3.56082	5.27853	89.1187	6.92262e-06	0.000247104
MTERF3	mitochondrial transcription termination factor 3	11.0746	10.3443	10.9582	3.22629	2.68634	3.10158	1.8314	3.55883	3.63782	75.4082	1.35035e-05	0.000311326
AC096649.2		3.97452	4.1431	1.57627	1.53521	0.394647	0.793363	1.83101	3.55785	0.130135	9.03467	0.0152498	0.0294379
DPM1	dolichyl-phosphate mannosyltransferase subunit 1, catalytic	11.7287	12.8355	12.9061	4.81403	2.60003	3.10345	1.83011	3.55564	3.27631	44.1422	0.000106408	0.000875194
USO1	USO1 vesicle transport factor	15.4278	16.1499	17.2261	5.14261	4.53156	3.94617	1.83004	3.55546	5.57518	92.5007	5.9568e-06	0.000227603
FPGT	fucose-1-phosphate guanylyltransferase	0.446315	0.453516	0.425293	0.196577	0.109488	0.062887	1.82977	3.55481	0.312189	14.536	0.00433823	0.0109478
CHM	CHM Rab escort protein	1.10756	1.43668	0.763294	0.553317	0.264696	0.121628	1.82931	3.55367	2.63186	12.8628	0.00612345	0.0142455
LUZP6	leucine zipper protein 6	8.68007	4.80111	8.51157	1.98957	0.369377	3.71282	1.82893	3.55273	-0.173659	7.18394	0.0257578	0.0451983
NSRP1	nuclear speckle splicing regulatory protein 1	90.9598	86.7233	113.132	34.8905	28.4455	17.8718	1.828	3.55044	8.21144	53.7142	5.07158e-05	0.000573634
RP11-326K13.4		1.17926	1.07433	0.190461	0.1855	0.289291	0.207702	1.827	3.54799	-0.163571	6.77527	0.0291968	0.0500873
GLIPR1	GLI pathogenesis related 1	7.10263	9.85275	5.99449	2.81626	1.73012	1.96428	1.82614	3.54586	4.95323	41.3387	0.000135697	0.00100809
PDGFRL	platelet derived growth factor receptor like	0.979423	0.746221	1.05064	0.280183	0.189979	0.300077	1.8261	3.54577	0.566046	22.1849	0.00118509	0.00417615
LA16c-360H6.2		6.46311	6.59975	3.18693	1.69305	1.57163	1.26379	1.82606	3.54568	-0.348216	12.3937	0.0067798	0.0154321
SMARCA5-AS1	SMARCA5 antisense RNA 1	25.374	19.6107	15.5597	9.22308	3.83977	4.03342	1.82571	3.5448	3.6124	24.5793	0.000845567	0.00330848
UBQLN1	ubiquilin 1	12.617	13.883	12.8153	5.06352	2.5722	3.47191	1.82524	3.54365	5.90038	52.9341	5.36322e-05	0.000594332
MAK16	MAK16 homolog	16.4634	20.8544	10.1473	4.64476	4.51291	4.2514	1.82523	3.54363	5.63004	38.8902	0.000169768	0.00115475
SREK1	splicing regulatory glutamic acid and lysine rich protein 1	26.6305	31.9354	25.8839	13.5259	6.22793	4.28926	1.82496	3.54297	8.36352	23.8888	0.000933182	0.0035275
PPP1CB	protein phosphatase 1 catalytic subunit beta	14.2654	13.7093	11.4874	6.16983	2.78091	2.24761	1.82394	3.54047	5.60043	26.9323	0.000621416	0.0026787
SPDYA	speedy/RINGO cell cycle regulator family member A	4.17475	4.53247	3.26138	1.84519	0.891628	0.660377	1.82307	3.53834	3.16578	22.7691	0.00108872	0.00394584
SERBP1P5	SERPINE1 mRNA binding protein 1 pseudogene 5	12.8	12.6199	8.95509	4.57214	3.21086	1.91976	1.82283	3.53773	3.1267	27.8019	0.000557504	0.00248789
TUG1_3		88.0937	69.0925	27.0797	27.4888	11.5863	13.3098	1.82166	3.53488	3.233	14.3463	0.00450496	0.0112621
TMTC3	transmembrane O-mannosyltransferase targeting cadherins 3	2.84574	3.6891	2.29879	1.59407	0.593389	0.345312	1.8214	3.53424	3.8023	13.2238	0.0056839	0.013457
PDIK1L	PDLIM1 interacting kinase 1 like	0.798556	1.009	0.710918	0.291197	0.216251	0.202875	1.82128	3.53394	1.32659	28.0374	0.000541599	0.00244979
CLCN3	chloride voltage-gated channel 3	4.48584	5.24754	4.24772	1.2068	1.48115	1.23796	1.8206	3.53228	4.60572	64.3407	2.52334e-05	0.000403461
RP11-1023L17.1		1.45297	1.22362	1.23807	0.504659	0.243769	0.355037	1.81981	3.53034	2.46814	34.6957	0.000256487	0.00150499
EPB41L4A	erythrocyte membrane protein band 4.1 like 4A	1.42579	1.35582	2.886	0.748871	0.495186	0.34076	1.81973	3.53016	3.36884	22.7528	0.00109128	0.00394824
AF131216.6		0.159289	0.373951	0.257266	0.0952147	0.0223292	0.10661	1.81916	3.52876	0.0769404	8.50329	0.017609	0.0330667
DHX40	DEAH-box helicase 40	9.11428	8.57974	8.07179	3.02405	1.95402	2.29605	1.81886	3.52803	5.02968	72.7418	1.55742e-05	0.000326099
PSMD6	proteasome 26S subunit, non-ATPase 6	4.35451	4.81866	3.95009	1.66305	0.842062	1.22098	1.81883	3.52794	4.68096	46.456	8.79098e-05	0.000786213
VBP1	VHL binding protein 1	11.0801	13.7184	15.4537	4.42083	3.59621	3.32167	1.81865	3.5275	4.11929	60.7908	3.14757e-05	0.00044396
UACA	uveal autoantigen with coiled-coil domains and ankyrin repeats	22.8639	16.3319	18.4184	6.91421	4.93712	4.34896	1.81773	3.52527	7.07525	70.6603	1.74671e-05	0.000345591
REV1	REV1 DNA directed polymerase	3.62672	2.80189	3.12208	1.29185	0.643784	0.761298	1.81766	3.5251	3.98327	42.2378	0.000125331	0.000960162
DPY30	dpy-30 histone methyltransferase complex regulatory subunit	22.358	23.1708	24.6756	7.12005	5.29946	7.36173	1.81756	3.52484	5.36163	82.0169	9.66157e-06	0.0002767
UCHL5	ubiquitin C-terminal hydrolase L5	18.0568	19.8334	16.185	8.22538	3.46971	3.74905	1.81746	3.5246	6.26801	31.6602	0.000354979	0.00185311
CLIP1	CAP-Gly domain containing linker protein 1	22.4948	23.6533	23.8525	11.268	4.80929	3.89429	1.81711	3.52376	7.92614	26.5378	0.000653367	0.002776
TM9SF3	transmembrane 9 superfamily member 3	26.2017	28.8056	16.21	9.58765	5.78236	4.96929	1.81612	3.52133	6.76168	33.5637	0.00028872	0.0016222
EIF3A	eukaryotic translation initiation factor 3 subunit A	431.395	533.938	427.914	195.306	110.513	91.9445	1.81571	3.52033	11.0493	41.4805	0.000133993	0.000999088
TENM3	teneurin transmembrane protein 3	4.59505	4.87962	3.01988	1.59429	0.802039	1.16813	1.81567	3.52023	5.00688	36.195	0.000220315	0.00136042
LCLAT1	lysocardiolipin acyltransferase 1	0.89784	0.939184	0.649357	0.359165	0.139162	0.209819	1.81546	3.51972	2.02228	22.2886	0.00116722	0.004141
RHPN1	rhophilin Rho GTPase binding protein 1	1.5914	0.767756	2.65776	0.626033	0.321257	0.448929	1.81528	3.51927	2.15538	16.3603	0.00306719	0.0084173
FAM91A1	family with sequence similarity 91 member A1	4.55865	4.46558	2.72784	1.33244	0.974471	1.02938	1.81487	3.51827	4.19372	43.1994	0.000115301	0.000914365
APPL1	adaptor protein, phosphotyrosine interacting with PH domain and leucine zipper 1	6.20247	6.72	5.68517	2.53696	1.66401	1.09326	1.81365	3.5153	4.80938	36.589	0.000211872	0.00132691
TMEM33	transmembrane protein 33	1.79461	1.69372	1.99288	0.637495	0.416558	0.494472	1.81282	3.51328	3.27391	56.5387	4.1661e-05	0.000517663
RCBTB1	RCC1 and BTB domain containing protein 1	3.20098	2.53027	2.12658	0.809058	0.584006	0.826172	1.81264	3.51285	2.93658	43.7068	0.000110406	0.000890085
PCGF6	polycomb group ring finger 6	4.68278	4.82824	3.56313	1.95416	0.800671	0.98085	1.81241	3.51229	2.88199	25.5868	0.000739115	0.00301669
TSN	translin	9.92947	13.3052	8.6694	3.33615	2.46268	3.303	1.81176	3.5107	4.92077	50.2654	6.53012e-05	0.000665983
RB1	RB transcriptional corepressor 1	2.8507	3.4809	2.38352	1.46517	0.572299	0.468722	1.81163	3.51039	3.53569	18.5285	0.0021	0.00635483
ITPR1	inositol 1,4,5-trisphosphate receptor type 1	2.73608	4.89697	3.27129	0.928518	1.06727	1.10845	1.81154	3.51017	4.92518	40.1749	0.000150726	0.00107745
C4B-AS1	C4B antisense RNA 1	0.982168	0.546041	0.532146	0.1821	0.312075	0.0784212	1.81149	3.51004	-0.025648	9.74335	0.0126811	0.0253918
FCHO2	FCH and mu domain containing endocytic adaptor 2	2.18067	2.31517	1.77038	1.00583	0.501526	0.284234	1.81144	3.50992	3.0492	18.6521	0.00205714	0.00626924
UGT1A7	UDP glucuronosyltransferase family 1 member A7	3.23929	4.66697	4.52651	2.44375	0.478542	0.670259	1.81056	3.50778	3.47899	11.1517	0.00900524	0.0194453
BNIP2	BCL2 interacting protein 2	6.57908	6.87403	5.4976	2.3421	1.63265	1.42253	1.81009	3.50664	5.01668	56.3641	4.21598e-05	0.00052027
MTMR2	myotubularin related protein 2	4.62709	4.36932	3.92948	1.58265	1.09518	0.993433	1.81001	3.50644	4.0828	56.5914	4.15117e-05	0.00051658
AC007319.1		5.06955	4.39642	6.87772	1.65471	1.46572	1.47327	1.80898	3.50394	2.36943	43.2875	0.000114433	0.000910818
KIAA1551	retroelement silencing factor 1	5.7917	5.09988	5.00067	2.1769	1.52973	0.810832	1.80847	3.50271	4.49667	30.3668	0.00041085	0.00202705
RNF38	ring finger protein 38	1.22471	1.57086	1.00142	0.31555	0.35683	0.40685	1.80808	3.50177	2.34263	33.623	0.000286911	0.00161762
DHX36	DEAH-box helicase 36	12.6942	15.123	9.96473	5.30409	3.2529	2.29281	1.808	3.50157	6.42248	32.285	0.000331345	0.00176714
RP3-508I15.21		3.35257	4.59313	4.17292	0.478145	1.06525	1.8738	1.80721	3.49965	0.417878	11.26	0.00876312	0.0190386
TMEM123	transmembrane protein 123	8.4248	8.62301	7.46952	2.9744	2.10335	1.90914	1.80695	3.49902	4.6102	61.5384	3.00158e-05	0.000434247
UGT1A10	UDP glucuronosyltransferase family 1 member A10	4.33645	6.30498	6.08918	3.28134	0.600575	0.967956	1.80642	3.49774	3.50784	10.9765	0.00938479	0.0200459
HELLS	helicase, lymphoid specific	12.8795	13.2213	9.18953	7.76453	1.15001	1.39878	1.80616	3.49711	6.26325	7.66737	0.023127	0.0413487
RP11-778J16.2		16.426	16.2165	15.1427	5.45538	5.07113	3.03309	1.80563	3.49583	3.00452	39.7054	0.000157365	0.00110349
SLC18B1	solute carrier family 18 member B1	3.53605	4.11899	3.95746	0.744461	1.16368	1.37134	1.80542	3.49531	2.61698	32.7186	0.000316074	0.00171628
DOCK7	dedicator of cytokinesis 7	0.867002	1.18927	0.769265	0.340987	0.227378	0.243083	1.80498	3.49425	3.92496	41.6348	0.00013217	0.000992314
ERLEC1	endoplasmic reticulum lectin 1	17.5386	19.3433	18.8551	5.97792	5.65011	4.2214	1.80404	3.49197	4.95201	70.5984	1.75275e-05	0.000345591
CSTF3	cleavage stimulation factor subunit 3	19.5697	17.8726	20.2118	6.52931	5.21794	4.63379	1.80347	3.49059	5.79585	88.6339	7.07636e-06	0.000248773
AP3B1	adaptor related protein complex 3 subunit beta 1	9.34899	14.1961	13.1323	3.80978	3.21086	3.46565	1.80299	3.48943	5.84835	62.1772	2.88339e-05	0.000428102
PGAP1	post-GPI attachment to proteins inositol deacylase 1	0.352588	0.266373	0.146393	0.078189	0.0922213	0.0463484	1.80294	3.4893	1.10726	15.7291	0.00344725	0.00922269
RAD21	RAD21 cohesin complex component	90.1392	83.0044	76.7678	30.8722	18.7365	21.842	1.8028	3.48896	8.36873	75.6797	1.33121e-05	0.000310432
CCDC58	mitochondrial matrix import factor 23	23.7112	30.9435	32.4434	11.883	7.58271	5.49523	1.80263	3.48855	5.02705	37.2386	0.000198798	0.00127395
ZBTB34	zinc finger and BTB domain containing 34	1.49095	1.32598	0.665928	0.355388	0.242477	0.397923	1.80243	3.48808	2.32214	22.2925	0.00116656	0.00414069
CACNG6	calcium voltage-gated channel auxiliary subunit gamma 6	0.829127	0.405689	1.80493	0.205882	0.317549	0.319186	1.80227	3.48769	0.321364	9.59905	0.0131578	0.0261246
UBR5	ubiquitin protein ligase E3 component n-recognin 5	21.9398	21.7064	15.8519	7.28888	4.87663	4.90178	1.80113	3.48493	7.38289	60.861	3.13349e-05	0.000443457
PARG	poly(ADP-ribose) glycohydrolase	8.54242	10.368	7.59002	3.26132	2.05865	2.2999	1.801	3.48463	4.87085	52.3506	5.5949e-05	0.000607931
MBNL1-AS1	MBNL1 antisense RNA 1	0.75827	0.818973	0.26539	0.329782	0.124107	0.0798383	1.80064	3.48376	1.42197	8.8003	0.0162387	0.0309614
AQR	aquarius intron-binding spliceosomal factor	3.00149	4.07831	2.67499	1.28205	0.737021	0.803973	1.79739	3.47591	4.83268	39.3297	0.000162937	0.00112474
RP3-425P12.4		1.29245	1.09648	0.623696	0.293252	0.373332	0.187629	1.79687	3.47465	-0.0465196	12.4197	0.00674123	0.0153593
FANCB	FA complementation group B	0.921619	1.5046	0.581064	0.529418	0.203359	0.143085	1.796	3.47256	1.10794	9.88191	0.0122432	0.0247035
OMA1	OMA1 zinc metallopeptidase	3.24677	2.98011	3.87375	1.16816	0.967157	0.742365	1.79551	3.47139	3.01161	47.6745	7.97582e-05	0.000739307
LARP4	La ribonucleoprotein 4	9.23977	13.1632	5.58641	2.86516	2.94177	2.28859	1.79485	3.4698	5.62226	28.9394	0.000485636	0.00227932
UGT1A4	UDP glucuronosyltransferase family 1 member A4	5.3304	7.82768	7.50287	4.10753	0.725866	1.21167	1.79361	3.46682	3.49147	10.5593	0.0103718	0.0217105
FAM199X	family with sequence similarity 199, X-linked	4.5989	5.22899	3.84264	1.68828	1.03896	1.22057	1.79358	3.46674	4.45731	50.1634	6.58063e-05	0.00066862
PUM3	pumilio RNA binding family member 3	27.4859	40.7379	30.387	13.1825	8.33248	7.08879	1.79324	3.46593	5.8478	39.6304	0.000158459	0.00110745
SUSD2	sushi domain containing 2	1.07059	1.38688	2.00911	1.06734	0.111464	0.124487	1.79245	3.46401	2.3479	5.27761	0.0490449	0.0773926
RP5-862P8.2		4.06191	4.28168	2.37896	1.06767	0.867216	1.1581	1.79151	3.46177	4.19689	37.9165	0.000186197	0.00122306
EML5	EMAP like 5	0.384093	0.713116	0.627272	0.309469	0.0742952	0.119485	1.79135	3.46139	2.05138	12.1967	0.00708119	0.0159773
EMC2	ER membrane protein complex subunit 2	13.6124	13.6927	10.1047	3.82641	3.85604	3.05903	1.79133	3.46134	4.92718	60.8548	3.13474e-05	0.000443457
FER1L4	fer-1 like family member 4 (pseudogene)	0.302583	0.115353	0.245913	0.0906245	0.0144215	0.0833511	1.79101	3.46057	0.421635	7.92481	0.0207153	0.0377543
EIF4A2	eukaryotic translation initiation factor 4A2	38.9631	36.9266	45.6263	13.2974	8.91204	12.6441	1.79062	3.45962	7.31362	83.034	9.19652e-06	0.000271191
NOC3L	NOC3 like DNA replication regulator	19.4825	26.0656	14.2488	9.89381	4.34254	3.29026	1.79061	3.45961	5.85154	18.6774	0.00205496	0.00626497
NPIPB1P	nuclear pore complex interacting protein family member B1, pseudogene	1.40445	1.09621	1.19673	0.414421	0.288525	0.348016	1.79058	3.45953	-0.0619135	17.7158	0.00241105	0.00705331
RP11-26J3.4		265.62	240.735	183.233	83.5414	56.1316	59.2614	1.79049	3.45932	7.81865	64.3425	2.52307e-05	0.000403461
LUCAT1	lung cancer associated transcript 1	13.557	5.8751	4.39929	0.576009	3.4446	2.64769	1.79007	3.45832	3.88459	7.60535	0.0235422	0.0419482
UGT1A9	UDP glucuronosyltransferase family 1 member A9	5.16682	7.61645	7.47038	4.08125	0.730652	1.12883	1.78967	3.45736	3.40175	10.2673	0.0111394	0.0229688
RP11-198M15.1		1.96863	2.6946	2.39208	0.716853	0.698716	0.601987	1.78872	3.45509	0.0756258	17.8566	0.00235331	0.00693176
BPGM	bisphosphoglycerate mutase	4.98135	4.41543	4.84184	1.58347	1.03001	1.47533	1.7885	3.45455	2.96086	50.4388	6.44538e-05	0.000662738
PMP22	peripheral myelin protein 22	2.28861	2.64828	1.85421	0.702301	0.625858	0.629085	1.7884	3.45431	2.11645	37.534	0.000193183	0.00125127
TTC14	tetratricopeptide repeat domain 14	1.93524	3.08241	1.87375	1.02936	0.537621	0.447514	1.78832	3.45412	3.54368	22.9852	0.00105553	0.00386
UGT1A8	UDP glucuronosyltransferase family 1 member A8	5.18613	7.64493	7.47328	4.09651	0.733384	1.13305	1.78796	3.45326	3.40043	10.2504	0.0111859	0.0230298
UGT1A5	UDP glucuronosyltransferase family 1 member A5	5.32325	7.84706	7.67087	4.20482	0.752774	1.16301	1.78796	3.45326	3.40043	10.2504	0.0111859	0.0230298
UGT1A3	UDP glucuronosyltransferase family 1 member A3	5.28047	7.78399	7.60921	4.17103	0.746724	1.15366	1.78796	3.45326	3.40043	10.2504	0.0111859	0.0230298
ACTR3B	actin related protein 3B	1.3162	1.29132	1.16042	0.31665	0.390716	0.370912	1.78795	3.45325	2.30085	43.0925	0.000116366	0.00091991
TRDMT1	tRNA aspartic acid methyltransferase 1	0.135418	0.173738	0.102963	0.0501406	0.0310298	0.0374278	1.78764	3.4525	-0.00459883	14.9188	0.00402433	0.0103613
MAP7D3	MAP7 domain containing 3	28.7435	32.111	25.6371	7.32927	9.72325	7.78337	1.78646	3.44968	7.03814	68.154	2.01364e-05	0.000362969
HINT3	histidine triad nucleotide binding protein 3	6.07648	5.28632	5.4734	2.24922	1.3218	1.28896	1.78588	3.44828	3.58372	45.1203	9.80556e-05	0.000838262
INSR	insulin receptor	1.35719	1.76698	2.07004	0.623371	0.328432	0.550209	1.7857	3.44786	3.54744	35.878	0.000227412	0.00138844
WRN	WRN RecQ like helicase	5.02541	6.09135	3.34788	1.81786	1.29971	1.09645	1.78429	3.44449	4.14264	33.3038	0.000296811	0.00165365
IFT88	intraflagellar transport 88	1.56683	1.77569	1.31647	0.797163	0.353057	0.209701	1.7841	3.44404	2.62896	15.8053	0.00339842	0.00912957
CEP85L	centrosomal protein 85 like	0.371138	0.50778	0.254753	0.186089	0.0690972	0.0763989	1.78396	3.4437	1.25137	13.7392	0.00509441	0.0123708
RP11-395L14.17		2.92928	2.63859	3.53097	1.10812	0.93643	0.556198	1.78374	3.44318	0.636986	19.5333	0.00178078	0.0056163
HMGB1	high mobility group box 1	264.853	290.436	303.97	134.423	52.1354	64.4065	1.78284	3.44102	10.4741	31.7547	0.000351274	0.00184263
ACBD5	acyl-CoA binding domain containing 5	7.56964	8.25524	6.83134	3.43748	1.39106	1.78914	1.78275	3.44081	4.41544	30.1393	0.00042177	0.00206347
RP11-488L18.4		3.59452	3.81319	2.31562	1.15483	0.711308	0.958372	1.78272	3.44074	2.19742	28.9688	0.000483934	0.0022733
PHF20L1	PHD finger protein 20 like 1	3.58894	5.10501	3.39671	1.55069	1.10762	0.872137	1.78248	3.44017	5.74963	40.1939	0.000150465	0.00107649
PSMA2	proteasome 20S subunit alpha 2	12.3448	13.7757	11.4516	4.8012	3.25306	2.86957	1.78164	3.43816	5.43162	55.9668	4.33228e-05	0.000525068
GPR180	G protein-coupled receptor 180	0.68106	0.918811	0.82995	0.34928	0.266796	0.0893905	1.78057	3.43561	2.22435	15.2035	0.00380891	0.00992757
PRMT3	protein arginine methyltransferase 3	7.46226	9.01558	9.05527	3.2744	2.04499	2.10362	1.78048	3.4354	4.90846	55.2802	4.54268e-05	0.000538538
ADAM10	ADAM metallopeptidase domain 10	3.58043	3.90362	2.83642	1.45388	0.837062	0.723504	1.78023	3.43482	5.16909	37.6013	0.00019193	0.00124663
AIMP1	aminoacyl tRNA synthetase complex interacting multifunctional protein 1	28.7625	33.7157	42.7791	13.3416	9.57712	7.58272	1.77935	3.43271	6.22978	50.042	6.64135e-05	0.000672426
DENND4C	DENN domain containing 4C	1.11372	1.34176	0.840704	0.607393	0.23924	0.123994	1.77758	3.4285	2.65127	11.8644	0.00762803	0.0169296
RIC1	RIC1 homolog, RAB6A GEF complex partner 1	1.89054	1.71203	1.55723	0.532883	0.388124	0.573713	1.77713	3.42744	3.25834	50.7239	6.30893e-05	0.000657246
CTD-2589H19.6		3.64184	3.14035	1.4856	1.1501	1.07451	0.166162	1.77711	3.4274	0.557594	7.15727	0.0259663	0.0455004
B4GALT6	beta-1,4-galactosyltransferase 6	0.604961	0.64063	0.420221	0.193576	0.135541	0.154818	1.77615	3.4251	0.97567	23.2459	0.00101713	0.00375672
AKR1C1	aldo-keto reductase family 1 member C1	2.00326	6.91352	12.0008	1.02787	2.27132	2.69166	1.77608	3.42493	5.29867	8.47734	0.01846	0.0343123
TBCK	TBC1 domain containing kinase	0.891299	1.01771	1.06294	0.324836	0.276534	0.260218	1.77544	3.42342	2.83824	52.2109	5.65218e-05	0.000612929
NADK2	NAD kinase 2, mitochondrial	3.98751	4.0613	4.81725	1.23752	1.3183	1.15694	1.77537	3.42326	3.75725	66.8756	2.16908e-05	0.000373216
MRPS22	mitochondrial ribosomal protein S22	12.275	14.6661	15.7373	5.20183	3.23741	3.99894	1.77508	3.42257	5.62578	62.6026	2.80785e-05	0.000422397
DPY19L1P1	DPY19L1 pseudogene 1	0.518244	0.806401	0.545935	0.113131	0.113419	0.316678	1.77493	3.42221	0.149217	10.3699	0.0108429	0.022477
CPD	carboxypeptidase D	4.09821	4.13642	3.1689	1.60875	0.967759	0.76037	1.7748	3.42192	4.94507	36.7777	0.000207967	0.00131232
GLCE	glucuronic acid epimerase	2.458	2.26277	2.15416	0.455906	0.749452	0.77314	1.77429	3.4207	3.29881	38.0395	0.000184018	0.00121593
AL022067.1		22.4932	25.7514	18.3626	10.8195	4.73288	4.03816	1.77408	3.42021	3.10273	21.1611	0.00138064	0.00467206
RP11-244N20.7		3.63113	3.43324	2.46871	0.616516	0.755439	1.38061	1.77406	3.42014	0.0548596	13.1183	0.0057989	0.0136756
NKIRAS1	NFKB inhibitor interacting Ras like 1	5.4902	5.99482	4.442	1.90966	1.1201	1.62731	1.7738	3.41953	3.58232	42.4221	0.000123329	0.000952287
[truncated: 5,511 more rows]

## Sheet: Table S4
NPC+42℃ vs NPC
Gene symbol	Description (Full name)	Fold difference	NPC+42℃			NPC
			1	2	3	1	2	3
HSP90AA4P	heat shock protein 90 alpha family class A member 4, pseudogene	10.9773	0.554123	0.748163	0.432761	0.158058	0	0
HSP90AA1	heat shock protein 90 alpha family class A member 1	10.9397	1958.01	2386.42	1892.77	380.331	108.995	80.8188
HSP90AA2P	heat shock protein 90 alpha family class A member 2, pseudogene	10.1493	46.0752	49.4434	39.0769	8.08489	3.007	2.16962
HSPA8	heat shock protein family A (Hsp70) member 8	8.38899	328.085	428.754	243.452	33.056	35.2652	50.9174
HSPE1	heat shock protein family E (Hsp10) member 1	5.43829	175.144	169.523	170.59	34.8235	31.0529	28.8696
HSPE1-MOB4	HSPE1-MOB4 readthrough	5.35786	350.123	362.394	360.657	73.6292	64.7554	61.9142
HSPD1P1	heat shock protein family D (Hsp60) member 1 pseudogene 1	4.67477	5.51566	7.23376	5.88304	1.64923	0.984864	1.35165
HSPA13	heat shock protein family A (Hsp70) member 13	4.35856	2.03442	2.68864	2.32771	0.461814	0.709295	0.446574
HSPE1P2	heat shock protein family E (Hsp10) member 1 pseudogene 2	4.14584	14.7935	12.3902	14.7701	4.12381	3.41855	2.57713
HSPD1	heat shock protein family D (Hsp60) member 1	3.74945	163.842	201.835	159.634	58.243	35.108	46.7527
HSPA4L	heat shock protein family A (Hsp70) member 4 like	3.66681	5.0569	6.84571	6.00234	2.54547	1.26023	1.07728
HSPA4	heat shock protein family A (Hsp70) member 4	3.15641	103.425	123.467	117.21	47.1952	29.9066	31.9153
GADD45G	growth arrest and DNA damage inducible gamma	3.10907	2.5941	1.6812	0.866094	0.26638	0.890194	0.497102
HSP90B1	heat shock protein 90 beta family member 1	2.95139	864.719	833.747	879.01	374.22	301.21	197.88
HSPB11	heat shock protein family B (small) member 11	2.56366	7.96944	9.27204	9.57189	4.19879	2.89926	3.36099
HSP90AB1	heat shock protein 90 alpha family class B member 1	2.36768	2580.26	2983.62	2095.35	1079.82	968.082	1187.01
HSPA9P1	heat shock protein family A (Hsp70) member 9 pseudogene 1	2.18758	1.51441	1.64308	1.90082	0.809948	0.72501	0.777332
GADD45A	growth arrest and DNA damage inducible alpha	0.285224	15.342	15.1653	21.3203	240.797	179.076	268.188
GADD45B	growth arrest and DNA damage inducible beta	0.273596	37.2134	23.1298	15.9674	34.3424	96.2349	148.34
CIRBP	cold inducible RNA binding protein	0.0753242	3.56296	2.66382	4.34836	9.29971	19.8254	7.95146

## Sheet: Table S5
GO ID	Pathway	Input number	Genes	Rich factor	-log10(Pvalue)
GO:0006915	apoptotic process	410	ZDHHC16;STK11;MKL1;FKBP8;SGPL1;LHX3;DLG5;APBB2;IRAK1;ARHGEF17;ARHGEF18;BDKRB2;GATA6;GATA3;RP11-823E8.3;BAK1;TNS4;TNFSF10;RP4-559A3.7;TNFSF15;ACVR1B;NUAK2;RAPGEF3;ITGA5;MX1;POLR1D;PHLDA1;SERPINE1;PHLDA3;HIP1R;PPP1R15A;BHLHE40-AS1;NAIF1;TNFRSF9;GDF15;PPARD;VEGFA;VEGFB;ARNT2;RPS6KA2;DNAJC5;GPX1;FLNA;C1orf147;TLE1;SMAD3;TNFRSF10B;TNFRSF10D;HINT2;PELI3;PRAME;TFPT;CDC34;ARF6;RP11-805J14.5;MECP2;CTD-226…	1.4	6.12733
GO:0007049	cell cycle	560	HSPA2;EXO1;VPS4B;BUB1B;HSPA8;RP11-144L1.8;EFCAB10;CTC-428H11.2;STK26;RP11-562A8.5;ALMS1;RP11-54O7.2;PRIM1;WEE1;RP5-867C24.5;AC019097.7;XXbac-BPG252P9.9;RP11-791G16.4;PIK3C3;GTSE1;AKAP9;LMLN;AHR;PTEN;CEP76;CEP70;RP11-1100L3.8;CEP78;NSL1;DTL;PDS5A;PDS5B;RAD1;ADARB1;XPO1;WDR43;RP11-540B6.6;BACH1;CETN2;TTK;TTN;PSMG2;SNX18P3;HMMR;STAG1;SENP6;DST;BRCC3;BLM;NOX5;RHOU;ANAPC1;ANAPC4;RP11-140L24.4;SPDL1;PS…	1.64	14.3286
GO:0000075	cell cycle checkpoint	94	RAD17;NPM1P46;BUB1B;BRCA1;CENPJ;CENPF;RINT1;TPR;THOC1;RPS6P25;RBBP8;FEM1B;PTPN11;GTSE1;APC;CLSPN;NPM1P34;RP11-481J2.4;RAD1;NPM1P32;NEK11;CCNE2;TTK;RP11-522I20.3;PSMG2;TOP2B;TOP2A;BUB1;BUB3;CNOT10;BRCC3;BLM;ZWILCH;SPDL1;TFDP1;CLOCK;ATM;PRKDC;RP11-62J1.3;ATR;BRIP1;CDC6;AC013461.1;MRE11A;DTL;KNTC1;NBN;MLK7-AS1;NAE1;FANCI;SETMAR;RP11-499P20.2;WAC;NPM1P19;EFCAB10;ZW10;TAOK1;CDK1;CDK5RAP2;MAD2L1;MSH2;G…	2.11	6.38775
GO:0044843	cell cycle G1/S phase transition	101	MTBP;NPM1P46;PRIM1;CUL5;CUL1;CUL2;CUL3;DDX3X;CENPJ;RPS6P25;ATP2B4;USP37;EIF4EP2;RP11-62J1.3;RBBP8;GTSE1;PTEN;DBF4;CCNH;FBXO5;ITGB1;ITGB1P1;MCM10;RP11-481J2.4;CCNE2;BACH1;CCNE1;RP11-92F20.1;CNOT10;RHOU;EIF4E;ORC1;RP11-75L1.2;PCNA;POLE2;TFDP1;CTD-2349P21.9;ATM;PRKDC;KIF14;STXBP4;CDC6;CDC7;ECD;SKP2;SPDYA;PLRG1;RPS6KB1;SUSD2;RANBP1;FBXW7;RP11-178C3.1;RDX;NPM1P19;RP11-646I6.6;NPAT;PKD2;ID2;CDK1;PPAT;C…	2.05	6.34455
GO:0044839	cell cycle G2/M phase transition	97	HSPA2;NPM1P46;PLK4;HAUS3;RP11-144L1.8;XXbac-BPG252P9.9;BORA;CALM2;ALMS1;WEE1;MAPRE1;CUL1;CENPJ;CENPF;RINT1;RP11-62J1.3;BRSK2;GTSE1;AKAP9;CEP290;CEP76;CEP70;CEP78;CLSPN;PCM1;HSP90AA2P;NPM1P32;NEK10;PPM1D;NEK2;HAUS6;USP47;HAUS2;CETN2;HAUS1;HMMR;BLM;CCP110;TAF2;CCNH;TUBB;MELK;TUBBP2;HSP90AA4P;ATM;KIF14;PRKAR2B;NES;CDC7;MRE11A;SKP2;MASTL;ARPP19;PPP1R12A;NAE1;FANCI;NBN;NPM1P19;VPS4B;EFCAB10;RAD51C;CEP…	2.44	8.91368
GO:0044770	cell cycle phase transition	200	HSPA2;MTBP;TMOD3;BUB1B;PLK4;CETN2;RP11-144L1.8;SUSD2;BORA;NPM1P46;HAUS6;CALM2;CENPF;ALMS1;PRIM1;DLGAP5;CUL5;WEE1;MAPRE1;CUL1;CUL2;CUL3;DDX3X;CENPJ;RPS6KB1;XXbac-BPG252P9.9;CENPE;RINT1;TPR;USH1C;PRKDC;ATP2B4;USP37;EIF4EP2;RP11-62J1.3;RBBP8;BRSK2;GTSE1;AKAP9;CEP290;PTEN;CEP76;DBF4;APC;CCNH;FBXO5;ITGB1;ITGB1P1;CLSPN;SMC5;PCM1;NPM1P34;HSP90AA2P;MCM10;RP11-481J2.4;NPM1P32;NEK10;NEK11;ESPL1;PPM1D;NEK2;…	2.06	11.8726
GO:0022402	cell cycle process	469	HSPA2;VPS4B;BUB1B;RP11-144L1.8;EFCAB10;CTC-428H11.2;RP11-562A8.5;ALMS1;RP11-54O7.2;PRIM1;WEE1;RP5-867C24.5;AC019097.7;XXbac-BPG252P9.9;RP11-791G16.4;PIK3C3;GTSE1;AKAP9;LMLN;PTEN;CEP76;CEP70;CEP78;NSL1;DTL;PDS5A;PDS5B;RAD1;XPO1;WDR43;RP11-540B6.6;BACH1;CETN2;TTK;TTN;PSMG2;SNX18P3;HMMR;SENP6;DST;BRCC3;BLM;ANAPC1;ANAPC4;RP11-140L24.4;SPDL1;PSMD14;PSMD10;PSMD12;MYH10;NUP133;PRKDC;NDC1;FSBP;CDC123;CDC…	1.76	16.1194
GO:0008219	cell death	435	ZDHHC16;STK11;MKL1;FKBP8;SGPL1;LHX3;DLG5;CTB-147C22.8;APBB2;IRAK1;ARHGEF17;ARHGEF18;BDKRB2;GATA6;GATA3;RP11-823E8.3;PARP16;BAK1;CLDN7;TNFSF10;RP4-559A3.7;TNFSF15;ACVR1B;NUAK2;RAPGEF3;ITGA5;MX1;POLR1D;PHLDA1;SERPINE1;PHLDA3;HIP1R;PPP1R15A;BHLHE40-AS1;NAIF1;TNFRSF9;GDF15;PPARD;VEGFA;VEGFB;ARNT2;RPS6KA2;DNAJC5;GPX1;FLNA;C1orf147;TLE1;SMAD3;TNFRSF10B;TNFRSF10D;HINT2;PELI3;PRAME;TFPT;CDC34;ARF6;RP11-8…	1.39	6.06609
GO:0006974	cellular response to DNA damage stimulus	292	PARPBP;RP11-438N5.2;WDR48;EXO1;RAD17;NPM1P46;ZRANB3;MCM10;SUMO1;SUMO2;PPP4R2;RP5-1112D6.8;DNAJA1;HIPK1;SLC30A9;PMS1;RPA1;TOPORS;SETD2;SMG1;ZBTB38;BCLAF1;RP11-54O7.2;CTD-2517M22.17;CTD-2349P21.11;UBR5;RFC4;BRCA1;AC019097.7;HIST1H4H;CENPJ;MRPS9;BARD1;WRN;SMARCAD1;REV3L;RP11-791G16.4;CNOT2;SUMO2P1;MORF4;THOC1;SNAI1;USP16;TDP2;POLG2;SHFM1;RBBP8;CUL4B;AC009133.21;FEM1B;PTPN11;GTSE1;SETD7;RBBP6;ASF1A;H…	1.84	12.0299
GO:0034605	cellular response to heat	57	NUP88;MKI67;HDAC2;HSPA7;HSP90AA4P;SEH1L;NUP35;HSPA8;HSP90AA2P;BAG2;HSPA1B;HSPA1A;BAG1;ATR;NDC1;RP11-676M6.1;HSPA6;RP11-737O24.3;HSPA1L;HSPH1;SCARA5;HSP90AB2P;DNAJB1;DNAJB6;HSP90AB4P;HSP90AB1;NF1;PDCD6;HSP90AA6P;RANBP2;NUP133;ATM;RP11-144L1.8;NUP107;NUP160;PTGES3P1;RP3-425P12.4;TPR;NUPL2;HSPA8P1;HSPA8P5;CHORDC1;BAG4;NUP50;NUP54;PTGES3;NUP58;RPA1;SLU7;DNAJC2;NUP153;PTGES3P3;NUP155;HSP90AB3P;HSP90AA…	2.63	6.31737
GO:0000077	DNA damage checkpoint	63	PCNA;RAD17;NPM1P46;CLSPN;MSH2;ATM;NPM1P34;PRKDC;RP11-62J1.3;ATR;RAD1;BRIP1;NPM1P21;INTS7;NEK11;NPM1P27;AC013461.1;MRE11A;CCNA2;CNOT10;TIPIN;DTL;NPM1P24;CLOCK;CNOT8;NBN;MLK7-AS1;NPM1P6;CNOT2;CNOT7;CNOT6;FANCI;BRCA1;NPM1P37;CDC5L;NPM1P35;NPM1P32;CENPJ;NPM1P31;CEP63;BRCC3;NPM1P9;WAC;NPM1P39;BLM;RP11-791G16.4;TP53BP1;NPM1P19;EFCAB10;THOC1;NPM1;TAOK1;RP11-75L1.2;RBBP8;FEM1B;PTPN11;GTSE1;CUL4A;CDK1;RIN…	2.11	4.48903
GO:0000729	DNA double-strand break processing	19	BRCA1;RBBP8;MRE11A;SETMAR;FGD5-AS1;BARD1;RP11-499P20.2;ATM;BLM;RP11-522I20.3;DNA2;NBN;TH2LCRR;HELB;RNF138;UBE2V2;SMARCAD1;RAD50;UBE2N	4.42	4.5527
GO:0006281	DNA repair	217	RP11-438N5.2;EXO1;RAD17;NPM1P46;ZRANB3;SUMO1;SUMO2;PPP4R2;RP5-1112D6.8;SLC30A9;PMS1;RPA1;SMG1;CTD-2517M22.17;UBR5;BRCA1;AC019097.7;HIST1H4H;BARD1;WRN;SMARCAD1;REV3L;SUMO2P1;MORF4;SETD2;TDP2;SHFM1;RBBP8;AC009133.21;HMGB1P35;DDX1;RBX1;CCNH;NPM1P37;NEIL3;PAXIP1-AS2;CLSPN;COPS2;COPS3;ZBTB1;COPS4;COPS5;HMGB1P3;RAD1;POLN;AC108463.2;XRCC2;XRCC5;KIN;NPM1P34;EMSY;USP7;PARPBP;USP45;USP47;RAD21;MSH3;CETN2;R…	2.11	13.4793
GO:0006302	double-strand break repair	83	FSBP;KDM1A;POLA1;POLQ;SUMO1;MSH2;ATM;PPP4R2;PRKDC;KB-431C1.5;DEK;PAXIP1-AS2;POLN;BRIP1;XRCC2;XRCC5;SMARCA5;HIST1H4H;DCLRE1A;HELB;LIG4;MRE11A;RAD54B;RAD51AP1;WDR48;DCLRE1B;RAD21;SMC5;BRCA1;MLH1;SMC6;CTD-2517M22.17;RP11-522I20.3;PARP1;WRN;NBN;RNF138;CDC7;SETX;MORF4L1;RP11-499P20.2;HERC2P3;HERC2P2;RIF1;NSMCE2;SETMAR;BARD1;HERC2P9;MORF4L1P1;RAD50;BRCC3;MMS22L;PAXIP1;FIGNL1;BLM;SMARCAD1;DNA2;RECQL;MOR…	2.11	5.70406
GO:0097191	extrinsic apoptotic signaling pathway	73	BCL2L1;TGFB1;TGFB2;BCL2L2;TIMP3;TRAF1;KRT8P33;TNFRSF10D;TMC8;SIVA1;SMAD3;TNFRSF10B;BAD;TNFSF10;KRT18P65;TNFAIP3;IL1A;ACVR1;IL1B;TNFRSF12A;CRADD;LTBR;AC006486.9;TMBIM1;PELI3;PEA15;KRT18P29;ACVR1B;ARHGEF2;TRADD;THBS1;SERPINE1;INHBA;CTD-2033D15.3;CIB1;AKT1;TNFRSF9;ICAM1;FADD;NRG1;RELA;DAPK3;RP11-805J14.5;EYA2;SRC;TRAF2;NOS3;RP5-1198O20.4;UNC5B;ST20;RNF41;MLLT11;PML;AGAP2;TNF;NGF;SNAI2;DEDD;MKNK2;PPP…	1.99	5.03889
GO:0000082	G1/S transition of mitotic cell cycle	97	MTBP;NPM1P46;PRIM1;CUL5;CUL1;CUL2;CUL3;DDX3X;CENPJ;RPS6P25;USP37;EIF4EP2;RP11-62J1.3;RBBP8;GTSE1;PTEN;DBF4;CCNH;ITGB1;ITGB1P1;MCM10;RP11-481J2.4;CCNE2;BACH1;CCNE1;RP11-92F20.1;CNOT10;RHOU;EIF4E;ORC1;RP11-75L1.2;PCNA;POLE2;TFDP1;CTD-2349P21.9;ATM;PRKDC;KIF14;FBXO5;CDC6;CDC7;ECD;SKP2;SPDYA;PLRG1;RPS6KB1;RANBP1;RP11-178C3.1;RDX;NPM1P19;RP11-646I6.6;NPAT;PKD2;ID2;CDK1;PPAT;CRLF3;POLA1;DHFR;LATS1;EZH2…	2.06	6.15702
GO:0000086	G2/M transition of mitotic cell cycle	80	HSPA2;VPS4B;HSP90AA4P;HAUS1;CLSPN;CALM2P2;ATM;PLK4;AKAP9;KIF14;CETN2;LATS1;PRKAR2B;CDC7;CEP290;NES;BORA;CENPJ;MRE11A;CCNA2;MELK;HAUS6;USP47;DYNC1I2;MASTL;ALMS1;PCM1;ARPP19;CEP135;PPP1R12A;CENPF;USH1C;WEE1;HSP90AA6P;MAPRE1;CUL1;FANCI;NBN;HMMR;HAUS3;DYNC1I2P1;PPM1D;CEP63;XXbac-BPG252P9.9;BRSK2;BLM;NEK2;RINT1;FGFR1OP;PCNT;CCP110;NAE1;SKP2;HSP90AA2P;RAD51C;CALM2;EFCAB10;PBX1;RP11-62J1.3;CEP152;PPP1CB…	2.1	5.46076
GO:0006298	mismatch repair	22	RPA1;MSH2;MSH3;MSH6;EXO1;MLH3;MLH1;HMGB1P24;HMGB1P21;HMGB1P20;HMGB1;PCNA;HMGB1P1;HMGB1P3;HMGB1P5;HMGB1P8;PMS1;SETD2;HMGB1P10;TDG;HMGB1P35;RP11-673C5.1	3.58	4.20371
GO:0000278	mitotic cell cycle	383	HSPA2;VPS4B;BUB1B;RP11-144L1.8;EFCAB10;CTC-428H11.2;RP11-522I20.3;RP11-562A8.5;ALMS1;RP11-54O7.2;PRIM1;WEE1;RP5-867C24.5;AC019097.7;XXbac-BPG252P9.9;RP11-791G16.4;GTSE1;AKAP9;CEP290;PTEN;CEP76;CEP70;CEP78;NSL1;PDS5A;PDS5B;SEPT7P6;WDR43;RP11-540B6.6;BACH1;CETN2;TTK;TTN;PSMG2;SNX18P3;HMMR;BRCC3;BLM;ANAPC1;ANAPC4;TUBGCP3;SPDL1;PSMD14;PSMD10;APITD1;HES1;MYH10;NUP133;PRKDC;NDC1;CDC123;CDC6;CDC7;ASPM;S…	2	19.8794
GO:0007093	mitotic cell cycle checkpoint	64	MAD2L1;RAD17;NPM1P46;CLSPN;MSH2;ATM;PRKDC;RP11-62J1.3;RP11-481J2.4;EFCAB10;NPM1P21;BUB1;NEK11;NPM1P27;RPS6P25;MRE11A;CCNA2;SETMAR;TIPIN;BUB1B;KNTC1;RB1;NPM1P24;TTK;RP11-522I20.3;CNOT8;NBN;PSMG2;NPM1P9;NPM1P6;NAE1;CNOT7;CNOT6;FANCI;TOP2A;PCNA;NPM1P37;NPM1P34;NPM1P35;NPM1P32;CENPJ;BUB3;NPM1P31;RP11-499P20.2;CENPF;CNOT10;TPR;NPM1P39;BLM;RINT1;NPM1P19;CNOT2;ZWILCH;ZW10;GEN1;NPM1;FGD5-AS1;TOP2B;GTSE1;…	2.11	4.57102
GO:0044772	mitotic cell cycle phase transition	193	HSPA2;MTBP;TMOD3;BUB1B;PLK4;CETN2;RP11-144L1.8;EFCAB10;BORA;NPM1P46;HAUS6;CALM2;CENPF;ALMS1;PRIM1;DLGAP5;CUL5;WEE1;MAPRE1;CUL1;CUL2;CUL3;DDX3X;CENPJ;RPS6KB1;XXbac-BPG252P9.9;CENPE;RINT1;TPR;USH1C;PRKDC;USP37;EIF4EP2;RP11-62J1.3;RBBP8;BRSK2;GTSE1;AKAP9;CEP290;PTEN;CEP76;DBF4;APC;CCNH;ITGB1;ITGB1P1;CLSPN;SMC5;PCM1;HSP90AA2P;MCM10;RP11-481J2.4;NPM1P32;NEK11;ESPL1;PPM1D;NEK2;CCNE2;USP47;CCNE1;HAUS2;H…	2.11	12.1178
GO:1903047	mitotic cell cycle process	361	HSPA2;VPS4B;BUB1B;RP11-144L1.8;EFCAB10;CTC-428H11.2;RP11-562A8.5;ALMS1;RP11-54O7.2;PRIM1;WEE1;RP5-867C24.5;AC019097.7;XXbac-BPG252P9.9;GTSE1;AKAP9;CEP290;PTEN;CEP76;CEP70;CEP78;NSL1;PDS5A;PDS5B;SEPT7P6;WDR43;RP11-540B6.6;BACH1;CETN2;TTK;TTN;PSMG2;SNX18P3;HMMR;BRCC3;BLM;ANAPC1;ANAPC4;TUBGCP3;SPDL1;PSMD14;PSMD10;PSMD12;MYH10;NUP133;PRKDC;NDC1;CDC6;CDC7;ASPM;SMC3;PLRG1;SMC5;SMC4;PSMD5;ESPL1;RP11-499…	2.03	19.7943
GO:1902751	positive regulation of cell cycle G2/M phase transition	19	NPM1P37;NPM1P34;NPM1P35;NPM1P32;NPM1P46;NPM1P31;RAD51C;NPM1P39;NPM1P21;RP11-75L1.2;NPM1P19;VPS4B;NPM1P9;NPM1P6;CDC7;NPM1;NPM1P24;NPM1P27;PBX1	4.88	4.95689
GO:1901989	positive regulation of cell cycle phase transition	39	MTBP;TMOD3;RP11-92F20.1;STXBP4;ANKRD17;NPM1P21;DDX3X;NPM1P24;NPM1P27;NPM1P46;NPM1;GS1-309P15.4;PLRG1;SMC5;RB1;ESPL1;CDC6;NPM1P9;NPM1P6;CDC7;CUL3;ANXA1;NPM1P37;NPM1P34;NPM1P35;NPM1P32;NPM1P31;DLGAP5;RDX;NPM1P39;RP11-75L1.2;NPM1P19;VPS4B;RAD51C;PBX1;RP11-56B16.5;CUL4A;CUL4B;NSMCE2	3.12	5.85802
GO:0012501	programmed cell death	415	ZDHHC16;STK11;MKL1;FKBP8;SGPL1;LHX3;DLG5;APBB2;IRAK1;ARHGEF17;ARHGEF18;BDKRB2;GATA6;GATA3;RP11-823E8.3;BAK1;CLDN7;TNFSF10;RP4-559A3.7;TNFSF15;ACVR1B;NUAK2;RAPGEF3;ITGA5;MX1;POLR1D;PHLDA1;SERPINE1;PHLDA3;HIP1R;PPP1R15A;BHLHE40-AS1;NAIF1;TNFRSF9;GDF15;PPARD;VEGFA;VEGFB;ARNT2;RPS6KA2;DNAJC5;GPX1;FLNA;C1orf147;TLE1;SMAD3;TNFRSF10B;TNFRSF10D;HINT2;PELI3;PRAME;TFPT;CDC34;ARF6;RP11-805J14.5;MECP2;CTD-22…	1.4	6.18724
GO:0042981	regulation of apoptotic process	322	BCL2L1;CTD-2325M2.1;BCL2L2;TIMP3;RP11-177H13.2;TIMP1;PELI3;LINC00667;DFNA5;SIVA1;MIEN1;AKT1;PTK2B;BOK;ARAF;BLCAP;CIB1;BDNF;THBS1;FKBP8;AXL;NKX2-5;RARA;MAP3K9;DLG5;RNPS1P1;RARG;CTB-60B18.15;GADD45A;GADD45B;DHRS2;APBB2;GATA3;INHBA;ETS1;INHBE;FADD;EDN1;RELA;IRAK1;GAS6-AS1;TNFRSF9;FLCN;DDIT3;NGEF;IL31RA;ARHGEF17;ARHGEF18;CTA-228A9.4;FAM129B;CREB3;LINC00941;ALKBH1;AC068282.3;HCLS1;TNFRSF21;F3;SNAI2;RP…	1.43	5.49338
GO:0010941	regulation of cell death	343	FKBP8;LHX3;DLG5;APBB2;IRAK1;ARHGEF17;ARHGEF18;BDKRB2;GATA6;GATA3;RP11-823E8.3;PARP16;BAK1;ABALON;TNFSF10;RP4-559A3.7;TNFSF15;NUAK2;RAPGEF3;ITGA5;ASNS;POLR1D;PHLDA1;SERPINE1;PHLDA3;PPP1R15A;BHLHE40-AS1;TNFRSF9;GDF15;PPARD;VEGFA;VEGFB;ARNT2;RPS6KA2;DNAJC5;GPX1;FLNA;TLE1;SMAD3;TNFRSF10B;TNFRSF10D;PELI3;PRAME;TFPT;CDC34;RP11-805J14.5;MECP2;CTD-2267D19.1;RP11-91P24.6;EEF1DP1;F3;TP73;PRKD1;GLS2;SPHK1;E…	1.42	5.55814
GO:1900034	regulation of cellular response to heat	48	NUP88;BAG2;BAG1;HSP90AA4P;NUP133;NUP35;HSPA8;HSP90AA2P;HSPA1B;HSPA1A;CHORDC1;ATR;NDC1;RP11-676M6.1;HSPA1L;RP11-737O24.3;SEH1L;HSP90AB2P;DNAJB1;DNAJB6;HSP90AB4P;HSP90AB1;HSP90AA6P;RANBP2;ATM;RP11-144L1.8;NUP107;NUP160;PTGES3P1;RP3-425P12.4;TPR;NUPL2;HSPA8P1;HSPA8P5;HSPH1;BAG4;NUP50;NUP54;PTGES3;NUP58;RPA1;DNAJC2;NUP153;PTGES3P3;NUP155;HSP90AB3P;HSP90AA1;NUP205	3.12	7.05324
GO:0007346	regulation of mitotic cell cycle	162	HSPA2;RAD17;MTBP;TMOD3;BUB1B;CHMP2B;EFCAB10;BORA;NPM1P46;RP11-186N15.3;ESPL1;DLGAP5;ECD;CUL1;CUL3;BRCA2;DDX3X;CENPJ;RPS6KB1;CENPF;CENPE;AC006978.6;RINT1;TPR;CNOT2;RPS6P25;EIF4EP2;RP11-62J1.3;PTPN11;GTSE1;RP3-330M21.5;PTEN;BTG3;CUL4B;APC;FBXO5;PCNA;EPGN;CLSPN;RP11-481J2.4;NEK11;NEK7;CDC16;CCSAP;USP47;TTK;RP11-522I20.3;CHMP5;PSMG2;RP11-92F20.1;TOP2B;TOP2A;ANLN;BUB1;BUB3;CNOT10;UBE2E1;BLM;FZD3;RP11-…	1.72	5.64774
GO:1901990	regulation of mitotic cell cycle phase transition	112	HSPA2;MTBP;TMOD3;BUB1B;NPM1P46;ESPL1;DLGAP5;CUL1;CUL3;DDX3X;CENPJ;CENPF;CENPE;AC006978.6;RINT1;TPR;CNOT2;RP11-62J1.3;GTSE1;PTEN;APC;PCNA;CLSPN;RP11-481J2.4;NEK11;CDC16;USP47;TTK;PSMG2;RP11-92F20.1;BUB1;BUB3;CNOT10;UBE2E1;BLM;ECD;RP11-446E9.1;ANAPC4;CDC27;PSMD14;CDC23;PSMD10;PSMD12;TFDP1;KNTC1;ATM;PRKDC;KIF14;ANAPC1;FBXO5;CDC6;CDC7;MRE11A;PLRG1;SMC5;PSMA3;PSMA1;NBN;PSMA4;PSMA5;NAE1;FANCI;RDX;NPM1P…	1.83	5.09639
GO:0009266	response to temperature stimulus	84	NUP88;HSPA2;HDAC2;HSPA7;HSP90AA4P;SEH1L;MKI67;NUP35;HSPA8;EIF2B3;PRKAA1;GCLC;BAG2;HSPA1B;HSPA1A;BAG1;ATR;HSPA8P1;RP11-153M3.1;RP11-676M6.1;SOD1;SLC12A5;RP11-737O24.3;HSPA1L;HSPH1;SCARA5;HSP90AB2P;GK;DNAJB1;RP11-54D18.4;RPS6KB1;DNAJB6;HSP90AB4P;DNAJB4;HSP90AB1;HSPD1;NF1;PDCD6;PPARGC1A;HSP90AA6P;TRPV3;RANBP2;RP11-178C3.1;ATM;RP11-144L1.8;HSPA6;DNAJA1P3;FOS;NUP160;PTGES3P1;PPARG;HSPD1P1;DNAJA1;RP3-4…	1.86	4.1919

## Sheet: Table S6
SUNE1 shCirbp vs SUNE1 shSCR
Gene symbol	Description (Full name)	Fold difference	SUNE1 shCirbp	SUNE1 shSCR
S100A9	S100 calcium binding protein A9	35.5865	135.9	3.81885
IFI6	interferon alpha inducible protein 6	26.0546	79.1344	3.03725
H1F0	H1.0 linker histone	20.2599	145.769	7.19499
DLL1	delta like canonical Notch ligand 1	17.2281	0.905185	0.0525412
IRF9	interferon regulatory factor 9	9.13277	17.2044	1.88381
PDE3A	phosphodiesterase 3A	8.83121	0.415897	0.047094
ST6GAL1	ST6 beta-galactoside alpha-2,6-sialyltransferase 1	8.27624	2.14614	0.259313
LCN2	lipocalin 2	7.04408	15.1922	2.15673
THBS1	thrombospondin 1	6.8141	2.8166	0.41335
GAS1	growth arrest specific 1	6.60924	3.03807	0.459669
ITPKB	inositol-trisphosphate 3-kinase B	6.57422	2.05886	0.313171
RP11-468E2.4		5.94065	16.4743	2.77315
RNF144B	ring finger protein 144B	5.72473	2.93755	0.513134
Xxbac-BPG248L24.12		4.4474	170.01	38.2268
WNT5A	Wnt family member 5A	4.39148	0.790701	0.180054
FYN	FYN proto-oncogene, Src family tyrosine kinase	3.47073	2.98996	0.86148
HLA-B	major histocompatibility complex, class I, B	3.31486	151.223	45.6196
HLA-F	major histocompatibility complex, class I, F	3.28386	4.44398	1.35328
MX1	MX dynamin like GTPase 1	2.37549	1.69792	0.714766
INHBE	inhibin subunit beta E	2.23607	8.42244	3.76662
C8orf4	transcriptional and immune response regulator	2.17885	1.32798	0.609486
UNC5B	unc-5 netrin receptor B	1.59389	8.31952	5.21964
GDF11	growth differentiation factor 11	0.479672	2.49348	5.1983
TGM2	transglutaminase 2	0.358725	5.09089	14.1916
SYT12	synaptotagmin 12	0.299767	0.46525	1.55204
CREB3L1	cAMP responsive element binding protein 3 like 1	0.298559	1.007	3.37289
SULF1	sulfatase 1	0.237377	0.158304	0.666889
HOXA5	homeobox A5	0.202683	0.436055	2.15141
CIDEC	cell death inducing DFFA like effector c	0.192852	0.758081	3.9309
SPP1	secreted phosphoprotein 1	0.154828	0.271362	1.75267
BIRC7	baculoviral IAP repeat containing 7	0.0730391	0.293252	4.015
VIL1	villin 1	0.0636569	0.41371	6.49906

## Sheet: Table S7
shCirbp&shSCR
GO terms representing biological process
GO ID	GO terms representing biological process (GO description)	Count	Genes	p-value
GO:0071357	cellular response to type I interferon	7	XXbac-BPG248L24.12;IFI6;HLA-B;IRF9;HLA-F;MX1;WNT5A	1.0341e-06
GO:0060337	type I interferon signaling pathway	7	XXbac-BPG248L24.12;IFI6;HLA-B;IRF9;HLA-F;MX1;WNT5A	1.0341e-06
GO:0060333	interferon-gamma-mediated signaling pathway	5	HLA-B;IRF9;XXbac-BPG248L24.12;SOCS3;HLA-F	0.000230138
GO:0071346	cellular response to interferon-gamma	6	XXbac-BPG248L24.12;SOCS3;HLA-B;IRF9;HLA-F;WNT5A	0.000265036
GO:0032615	interleukin-12 production	3	HLA-B;XXbac-BPG248L24.12;THBS1	0.00456802
GO:0019221	cytokine-mediated signaling pathway	9	XXbac-BPG248L24.12;SOCS3;IFI6;HLA-B;IRF9;HLA-F;RP11-468E2.4;MX1;WNT5A	0.00714632
GO:0032635	interleukin-6 production	3	HLA-B;WNT5A;XXbac-BPG248L24.12	0.031545
GO:0006915	apoptotic process	18	H1F0;IFI6;SOCS3;LCN2;UNC5B;PDE3A;ST6GAL1;FYN;C8orf4;THBS1;DLL1;ITPKB;RNF144B;INHBE;GAS1;S100A9;WNT5A;MX1	0.0292287
GO:0043066	negative regulation of apoptotic process	10	IFI6;SOCS3;ST6GAL1;UNC5B;PDE3A;FYN;THBS1;DLL1;ITPKB;WNT5A	0.0292124
GO:2001234	negative regulation of apoptotic signaling pathway	4	UNC5B;IFI6;FYN;THBS1	0.0371907
GO:0042981	regulation of apoptotic process	8	TGM2;BIRC7;VIL1;SYT12;HOXA5;CREB3L1;CIDEC;GDF11	0.0147695
GO:0097192	extrinsic apoptotic signaling pathway in absence of ligand	3	UNC5B;IFI6;FYN	0.0111487
GO:2001236	regulation of extrinsic apoptotic signaling pathway	4	UNC5B;IFI6;FYN;THBS1	0.01662
GO:0008219	cell death	9	TGM2;BIRC7;VIL1;SULF1;SYT12;HOXA5;CREB3L1;CIDEC;GDF11	0.0329329
GO:0012501	programmed cell death	18	H1F0;IFI6;SOCS3;LCN2;UNC5B;PDE3A;ST6GAL1;FYN;C8orf4;THBS1;DLL1;ITPKB;RNF144B;INHBE;GAS1;S100A9;WNT5A;MX1	0.0322848
GO:0012501	programmed cell death	9	TGM2;BIRC7;VIL1;SULF1;SYT12;HOXA5;CREB3L1;CIDEC;GDF11	0.0242182
GO:0043069	negative regulation of programmed cell death	10	IFI6;SOCS3;ST6GAL1;UNC5B;PDE3A;FYN;THBS1;DLL1;ITPKB;WNT5A	0.0315498
GO:0043067	regulation of programmed cell death	8	TGM2;BIRC7;VIL1;SYT12;HOXA5;CREB3L1;CIDEC;GDF11	0.0154661
GO:0019934	cGMP-mediated signaling	2	PDE3A;THBS1	0.00316078
GO:0046068	cGMP metabolic process	2	WNT5A;THBS1	0.0342283
GO:0030823	regulation of cGMP metabolic process	2	WNT5A;THBS1	0.0150917

## Sheet: Table S8
shCirbp&shSCR
KEGG pathway analysis
Pathway	Count	Genes	p-value
cGMP-PKG signaling pathway	3	PDE3A;CREB3L1;CNGB1	0.00586243
PI3K-Akt signaling pathway	4	SPP1;THBS1;CREB3L1;PDGFRB	0.00725226

## Sheet: Table S9
SUNE1&CNE2 Cirbp+42℃ vs Cirbp
Gene symbol	Description (Full name)	Fold difference	CNE2 Cirbp+42℃	SUNE1 Cirbp+42℃	CNE2 Cirbp	SUNE1 Cirbp
HSPA6	heat shock protein family A (Hsp70) member 6	218.746	119.999	5.86082	0.279555	0.295813
SNORD2	small nucleolar RNA, C/D box 2	113.133	11.701	18.4871	0.266838	0
SNORA4	small nucleolar RNA, H/ACA box 4	103.475	2.07313	2.63276	0	0.0454786
FOSB	FosB proto-oncogene, AP-1 transcription factor subunit	86.8124	33.737	17.4828	0.417772	0.172234
C6orf25	megakaryocyte and platelet inhibitory receptor G6b	85.8506	1.42946	0.434324	0	0.0217096
DCAF4L1	DDB1 and CUL4 associated factor 4 like 1	82.9518	0.886549	0.221811	0	0.0133615
EGR2	early growth response 2	72.3726	2.10104	9.35097	0.019964	0.138273
EGR3	early growth response 3	59.0704	0.711748	1.61558	0	0.0393992
LSMEM1	leucine rich single-pass membrane protein 1	52.0971	2.03088	1.37169	0.0284133	0.0368988
FOS	Fos proto-oncogene, AP-1 transcription factor subunit	49.6501	51.7035	48.7408	0.841553	1.18149
RP11-375I20.6		43.4169	1.29445	1.77125	0.0378455	0.0327652
MUC6	mucin 6, oligomeric mucus/gel-forming	43.3024	0.432998	0.2222	0	0.0151308
LINC00106	long intergenic non-protein coding RNA 106	42.9601	2.56394	2.06305	0	0.107705
RP11-479G22.8		33.4566	1.28739	1.10832	0.0716065	0
EID3	EP300 interacting inhibitor of differentiation 3	32.9023	3.65435	1.57257	0.0502026	0.108659
RP11-734K23.9		29.942	4.61203	0.946869	0.144077	0.0415788
RP11-69I8.3		26.935	2.21822	9.26619	0.297565	0.12881
JUN	Jun proto-oncogene, AP-1 transcription factor subunit	26.4576	188.532	130.896	5.87722	6.19599
EGR1	early growth response 1	26.2723	85.471	123.422	3.0745	4.87656
RP11-343L5.2		25.6047	0.995873	1.05898	0	0.0802531
SNORA63	small nucleolar RNA, H/ACA box 63	24.1475	1.28797	1.1626	0.0543924	0.0470909
CTGF	cellular communication network factor 2	23.451	7.82861	29.8094	0.787166	0.817799
HMGB1P14	high mobility group box 1 pseudogene 14	21.607	1.74862	1.92878	0.0623073	0.107887
CTD-2006C1.13		20.579	0.480273	0.452548	0.0165947	0.0287341
AC159540.1		20.0244	2.2517	0.653062	0.0906986	0.0543624
RP11-448G15.3		19.5753	0.386433	0.32476	0	0.0363311
CXCL8	C-X-C motif chemokine ligand 8	17.1587	2.15866	1.02643	0.129547	0.0560783
LINC00641	long intergenic non-protein coding RNA 641	16.9823	2.48073	2.36026	0.128867	0.156195
CCDC150P1	coiled-coil domain containing 150 pseudogene 1	16.7169	1.47258	0.526883	0.0332493	0.0863581
RP11-325P15.2		16.3692	1.19707	3.84911	0	0.308273
ARC	activity regulated cytoskeleton associated protein	13.7723	3.22839	1.04352	0.24623	0.0639529
RP3-425C14.4		12.9462	0.570297	0.668763	0.0302453	0.0654631
SNORA31	small nucleolar RNA, H/ACA box 31	12.687	0.633424	0.415885	0.0338556	0.0488516
CYCSP6	CYCS pseudogene 6	12.4426	7.16473	3.95426	0.365798	0.527823
RGPD3	RANBP2 like and GRIP domain containing 3	12.247	0.499575	0.326546	0.0126585	0.0547964
RNA5-8S5	RNA, 5.8S ribosomal 5	11.8779	21.5034	26.4089	2.49703	1.53672
CTD-2310F14.1		11.5806	0.683889	0.686498	0.0433219	0.075013
AKAP5	A-kinase anchoring protein 5	11.4999	0.232151	0.173423	0.00980395	0.0254637
VTRNA1-2	vault RNA 1-2	11.3301	58.4208	24.701	6.61998	0.716416
RP11-363L24.3		11.2271	2.76934	3.04347	0.09716	0.420587
HSP90AA6P	heat shock protein 90 alpha family class A member 6, pseudogene	11.1502	2.65021	2.60906	0.172678	0.298997
NLGN1	neuroligin 1	11.1187	0.194125	0.106979	0.0145146	0.0125662
RP11-157L3.11		11.0409	2.80147	2.55056	0.177463	0.307282
CCNL1	cyclin L1	10.5242	17.9066	30.0602	1.90256	2.65519
GOLGA6L3	golgin A6 family like 3	10.5093	1.26948	1.01838	0.0657957	0.151902
HSPA1B	heat shock protein family A (Hsp70) member 1B	10.4137	4805.88	933.181	370.179	180.926
SNORD26	small nucleolar RNA, C/D box 26	10.354	25.8358	19.5413	0.981964	3.40059
UBE2Q2P1	ubiquitin conjugating enzyme E2 Q2 pseudogene 1	10.3067	2.86659	1.73238	0.244838	0.201373
AGAP10P	ArfGAP with GTPase domain, ankyrin repeat and PH domain 10, pseudogene	10.0361	1.01505	0.695913	0.0913738	0.079108
RP11-159D12.2		9.97838	1.25578	1.0647	0.0570222	0.175529
RP11-182J1.12		9.85779	4.1353	3.08918	0.14969	0.58318
F7	coagulation factor VII	9.8205	2.65506	0.328977	0.135845	0.168013
TBC1D32	TBC1 domain family member 32	9.78508	0.481244	0.55365	0.031965	0.0737975
HSPA1A	heat shock protein family A (Hsp70) member 1A	9.49663	3985.87	705.886	364.173	129.872
AC025442.3		9.35281	7.38549	8.06883	0.459339	1.19303
MIR222	microRNA 222	9.33511	22.8999	23.9331	0.669521	4.34735
RGPD4	RANBP2 like and GRIP domain containing 4	9.21958	0.425553	0.253326	0.0269573	0.0466772
SGPP2	sphingosine-1-phosphate phosphatase 2	9.21911	1.55859	0.935603	0.0220765	0.248469
AC083843.1		9.01979	0.459657	0.21268	0.0235558	0.0509844
RP11-762H8.2		9.00982	3.85678	3.55366	0.317902	0.504584
GOLGA6L5P	golgin A6 family like 5, pseudogene	8.96679	5.34242	4.08606	0.462775	0.588715
NEB	nebulin	8.80319	0.0950871	0.0879027	0.00722812	0.0135586
RND3	Rho family GTPase 3	8.78363	24.8635	32.0341	3.45286	3.02484
PLGLB2	plasminogen like B2	8.76808	1.60471	0.866959	0.0980221	0.183872
NKTR	natural killer cell triggering receptor	8.74795	11.5421	9.60149	0.7638	1.65317
SNORD56	small nucleolar RNA, C/D box 56	8.7298	15.1361	5.97642	0.743912	1.67453
AP000648.5		8.70887	3.5899	0.933392	0.285961	0.233427
ZNF300	zinc finger protein 300	8.69056	1.85964	1.76589	0.200355	0.216825
RP4-613B23.1		8.67238	15.88	12.5504	1.12582	2.15244
RP11-348P10.2		8.62608	1.28981	1.37579	0.113129	0.195887
GOLGA8B	golgin A8 family member B	8.49876	14.7074	10.4175	0.657736	2.29856
GOLGA8A	golgin A8 family member A	8.4827	28.6634	23.1198	1.24928	4.85529
ZGRF1	zinc finger GRF-type containing 1	8.46392	0.996905	1.48479	0.0970853	0.196123
MTSS1	MTSS I-BAR domain containing 1	8.40484	0.275845	0.151035	0.00953116	0.0412586
AC017101.10		8.38886	1.7533	2.13893	0.128979	0.334997
RP5-1112D6.8		8.38113	0.59126	0.685592	0.0341355	0.118213
FOXN2	forkhead box N2	8.31267	1.50838	1.44592	0.134368	0.221029
RP11-144L1.8		8.2923	2.92098	3.81998	0.356851	0.456067
DDR2	discoidin domain receptor tyrosine kinase 2	8.27445	0.144469	0.222589	0.020591	0.0237693
CLK1	CDC like kinase 1	8.26644	23.6183	6.74053	1.08263	2.58991
PTBP2	polypyrimidine tract binding protein 2	8.21262	0.451832	0.18042	0.0227711	0.0542144
RP11-499P20.2		8.07853	1.31229	0.689286	0.187041	0.0607248
GOLGA6L10	golgin A6 family like 10	7.95489	2.31508	2.37732	0.0624791	0.527398
MIR568	microRNA 568	7.95001	0.218638	0.124875	0.00968151	0.0335276
RP11-485O10.2		7.92457	11.852	9.89363	1.72327	1.02081
NME9	NME/NM23 family member 9	7.9199	0.492456	0.406601	0.0197023	0.0938164
RP11-517B11.7		7.88427	0.409147	0.359478	0.0424113	0.0550772
ANKRD1	ankyrin repeat domain 1	7.86698	13.5772	9.50402	1.93515	0.998784
ZEB2	zinc finger E-box binding homeobox 2	7.66312	1.55977	0.69835	0.161541	0.133133
ACRC	germ cell nuclear acidic peptidase	7.65266	2.69346	1.04935	0.101695	0.387391
SNORA81	small nucleolar RNA, H/ACA box 81	7.64761	2.72473	1.42648	0.101863	0.440948
HSPA1L	heat shock protein family A (Hsp70) member 1 like	7.62511	9.67319	2.76314	0.854007	0.776963
RGPD1	RANBP2 like and GRIP domain containing 1	7.50582	1.65445	0.849256	0.203653	0.129916
RGPD2	RANBP2 like and GRIP domain containing 2	7.489	7.07703	4.29762	0.95338	0.565468
NFKBIZ	NFKB inhibitor zeta	7.45233	1.00135	2.49241	0.112305	0.356509
ZNF25	zinc finger protein 25	7.39826	0.433742	0.524395	0.0694131	0.0600953
PGBD4	piggyBac transposable element derived 4	7.39213	0.185602	0.192923	0.0222769	0.0289297
RP11-267M23.1		7.38255	0.608215	0.573481	0.101489	0.058577
CCDC121	coiled-coil domain containing 121	7.30661	6.05243	2.36669	0.233061	0.9192
DNAJB4	DnaJ heat shock protein family (Hsp40) member B4	7.3002	16.3224	4.40506	1.18755	1.65175
RP11-114F3.4		7.27229	2.73434	2.54637	0.337058	0.389084
PAXBP1-AS1	PAXBP1 antisense RNA 1	7.22052	0.63057	0.617137	0.0546075	0.118193
CCDC150	coiled-coil domain containing 150	7.21841	1.60757	0.868904	0.152117	0.190961
CTD-2031P19.5		7.15356	4.01152	2.86049	0.600637	0.360006
PARD6B	par-6 family cell polarity regulator beta	7.12764	0.751676	1.56779	0.0623337	0.263085
METTL15P1	methyltransferase like 15 pseudogene 1	7.04364	1.94696	1.19471	0.140952	0.305077
NEK7	NIMA related kinase 7	7.03492	3.56214	3.39443	0.308822	0.680041
NAIP	NLR family apoptosis inhibitory protein	7.01471	0.342875	0.219681	0.0232253	0.0569714
ANKRD36	ankyrin repeat domain 36	6.99697	4.55867	3.01999	0.479812	0.603323
CHD9	chromodomain helicase DNA binding protein 9	6.99223	1.5754	1.87659	0.15174	0.34195
HELLPAR	HELLP associated long non-coding RNA	6.96444	0.0253617	0.0113852	0.0010777	0.00419865
BTAF1	B-TFIID TATA-box binding protein associated factor 1	6.95173	9.31104	9.20319	0.951917	1.71134
ANKRD36B	ankyrin repeat domain 36B	6.93124	3.73934	2.26072	0.38069	0.484965
EDN1	endothelin 1	6.90398	3.39945	7.51607	0.79697	0.784076
ANKRD36C	ankyrin repeat domain 36C	6.79244	1.58197	1.27884	0.146023	0.275153
ZNF724P	zinc finger protein 724	6.66988	0.476352	0.351309	0.0665087	0.0575807
KLHL15	kelch like family member 15	6.66364	1.80216	1.5708	0.21136	0.294814
RP11-406H23.2		6.65835	4.50325	11.0833	0.880246	1.46066
SLC25A27	solute carrier family 25 member 27	6.64763	1.01167	2.55888	0.100795	0.436321
MYSM1	Myb like, SWIRM and MPN domains 1	6.64267	3.31691	2.0527	0.308992	0.499359
SCML1	Scm polycomb group protein like 1	6.62322	1.28074	1.7577	0.133977	0.324779
RP11-203B9.4		6.61286	0.95873	0.871944	0.0823628	0.194473
RGPD5	RANBP2 like and GRIP domain containing 5	6.59994	1.6791	1.33453	0.218214	0.238401
YOD1	YOD1 deubiquitinase	6.52632	2.07506	1.65233	0.248465	0.322668
RP3-368A4.5		6.51359	0.903292	0.884491	0.0944923	0.179977
ZNF518A	zinc finger protein 518A	6.50668	1.9126	1.44537	0.202866	0.313214
THAP12P7	THAP domain containing 12 pseudogene 7	6.49904	0.592305	0.521479	0.0321604	0.139216
CTC-534A2.2		6.48196	3.78197	3.06783	0.374986	0.681763
ZDHHC17	zinc finger DHHC-type palmitoyltransferase 17	6.47046	0.913795	0.64459	0.0669521	0.173894
N4BP2	NEDD4 binding protein 2	6.45098	1.6878	0.587794	0.164742	0.188009
CFAP44	cilia and flagella associated protein 44	6.44902	0.656905	0.236919	0.054585	0.0840136
AC010184.1		6.37235	18.7216	24.7806	2.66838	4.15833
PKI55	long intergenic non-protein coding RNA 1963	6.3664	0.595011	0.327619	0.0233949	0.121527
NCLP1	nucleolin pseudogene 1	6.33638	1.69453	1.41026	0.262624	0.22737
POLQ	DNA polymerase theta	6.32571	5.9333	5.59848	0.669877	1.15313
LIG4	DNA ligase 4	6.31846	3.07709	1.7075	0.335752	0.421489
LINC00342	long intergenic non-protein coding RNA 342	6.31563	8.26489	3.15155	0.675147	1.1325
RANBP17	RAN binding protein 17	6.28954	0.240896	0.199981	0.0468963	0.0232006
KPNA5	karyopherin subunit alpha 5	6.27655	0.712821	0.805875	0.09676	0.145203
RP11-575L7.2		6.26818	1.15693	1.83345	0.150762	0.32631
CCNT2	cyclin T2	6.25418	3.42116	2.50455	0.389282	0.558199
TWF1P1	twinfilin 1 pseudogene 1	6.24456	1.63167	1.31952	0.351036	0.121565
HERC2P2	HERC2 pseudogene 2	6.24177	8.65675	8.33897	0.814191	1.90871
RP11-389G6.4		6.24114	2.84954	5.0416	0.22801	1.03636
GPRASP1	G protein-coupled receptor associated sorting protein 1	6.20784	0.305629	0.179796	0.0580814	0.0201139
RP11-332H14.2		6.18838	1.30153	1.4007	0.0854129	0.35125
SMCO2	single-pass membrane protein with coiled-coil domains 2	6.15643	1.09391	1.02909	0.167549	0.177293
GPAM	glycerol-3-phosphate acyltransferase, mitochondrial	6.14995	1.31708	1.18713	0.127651	0.27954
BCLAF1P1	BCL2 associated transcription factor 1 pseudogene 1	6.14645	0.797981	0.572004	0.107045	0.115845
CTB-13F3.1		6.14011	3.41033	2.51865	0.353507	0.612106
GOLGA6L17P	golgin A6 family like 17, pseudogene	6.13953	1.68657	1.55739	0.261161	0.267213
CASP8AP2	caspase 8 associated protein 2	6.13792	9.09043	9.25724	1.10863	1.8806
TBK1	TANK binding kinase 1	6.11723	10.6677	9.39834	1.79401	1.48624
CAPRIN2	caprin family member 2	6.11701	12.6685	6.21919	1.21107	1.87667
SMCHD1	structural maintenance of chromosomes flexible hinge domain containing 1	6.06424	5.08093	5.91492	0.747933	1.0653
ZNF507	zinc finger protein 507	6.04908	4.02571	3.19486	0.524227	0.669437
ZNF860	zinc finger protein 860	6.02013	1.65284	1.03139	0.191849	0.254028
CTD-2215E18.1		5.99617	2.05332	0.893083	0.349137	0.142244
ZNF816	zinc finger protein 816	5.99195	1.14154	0.910154	0.11125	0.231158
RP11-703M24.5		5.98548	2.30897	2.87189	0.561657	0.303914
TTC37	tetratricopeptide repeat domain 37	5.98459	11.7613	8.48228	1.92491	1.45771
CTAGE8	CTAGE family member 8	5.94932	1.13556	0.849455	0.0996003	0.234053
IL6ST	interleukin 6 cytokine family signal transducer	5.9456	3.29481	2.46521	0.443849	0.524938
NPIPB15	nuclear pore complex interacting protein family member B15	5.94054	0.796933	1.05246	0.086542	0.224775
DGKE	diacylglycerol kinase epsilon	5.93698	1.025	0.640472	0.134725	0.1458
RP11-380N8.7		5.93625	8.00409	11.1721	1.0317	2.19866
CHD1	chromodomain helicase DNA binding protein 1	5.92623	20.4933	10.6903	3.04129	2.22067
FSD1L	fibronectin type III and SPRY domain containing 1 like	5.92004	0.418521	0.222577	0.0372822	0.0710106
OSBPL8	oxysterol binding protein like 8	5.9149	5.58259	5.49717	0.708609	1.16459
ARHGAP29	Rho GTPase activating protein 29	5.91099	0.963184	1.03674	0.118602	0.219738
AC026348.1		5.90583	1.29411	0.424301	0.119106	0.171863
N4BP2L2-IT2	N4BPL2 intronic transcript 2	5.90128	0.330212	0.24421	0.0451824	0.0521563
HES1	hes family bHLH transcription factor 1	5.89565	160.252	244.608	12.9651	55.7059
GOLGA6L9	golgin A6 family like 9	5.88005	4.58688	4.30057	0.352781	1.15868
SLC7A11-AS1	SLC7A11 antisense RNA 1	5.87835	3.65354	2.7753	0.591712	0.501933
MIR222HG	miR222/221 cluster host gene	5.87656	0.834909	0.438538	0.0793328	0.137367
RP11-142E9.1		5.86795	1.33749	0.755207	0.0953157	0.261316
CEP162	centrosomal protein 162	5.83903	4.05307	3.84253	0.571796	0.780415
NAT1	N-acetyltransferase 1	5.82565	0.346598	0.32555	0.0348709	0.0805064
ARL5B	ADP ribosylation factor like GTPase 5B	5.82258	0.63279	0.935363	0.0921103	0.177213
GOLGA6L4	golgin A6 family like 4	5.80899	1.70925	1.36934	0.267146	0.262824
RP11-573D15.9		5.80532	11.9491	14.6786	1.8105	2.77626
RP11-545I5.3		5.79329	0.438271	0.323948	0.048167	0.0834023
RP11-278C7.1		5.78542	2.53859	3.61875	0.366404	0.697882
KIAA1551	retroelement silencing factor 1	5.78375	7.73597	8.30635	1.00841	1.76528
CTD-2349P21.11		5.77739	2.17661	1.99939	0.173152	0.549664
SETX	senataxin	5.76702	5.2326	4.88487	0.724946	1.02942
MOSPD1	motile sperm domain containing 1	5.76597	0.917533	0.568178	0.0550634	0.202605
FRS2	fibroblast growth factor receptor substrate 2	5.76477	2.50617	1.61525	0.406779	0.308152
MANEA	mannosidase endo-alpha	5.76309	1.53785	2.09821	0.212977	0.417944
ALMS1-IT1	ALMS1 intronic transcript 1	5.75991	1.83928	1.66167	0.244675	0.363138
ZBTB41	zinc finger and BTB domain containing 41	5.73952	1.45594	1.5057	0.15483	0.361179
ATAD5	ATPase family AAA domain containing 5	5.72138	7.01127	6.89736	1.12423	1.30676
XXbac-BPGBPG55C20.2		5.71084	0.555141	0.481756	0.110086	0.071481
DMXL2	Dmx like 2	5.70845	3.66523	1.08114	0.552075	0.27939
ZNF26	zinc finger protein 26	5.68713	0.677999	0.573696	0.0458906	0.174202
CEP152	centrosomal protein 152	5.67951	16.3213	13.3145	2.75907	2.45895
ZNF841	zinc finger protein 841	5.66983	1.8381	1.60172	0.309226	0.297462
RGPD6	RANBP2 like and GRIP domain containing 6	5.66689	0.677003	0.432325	0.0664037	0.129352
SLF1	SMC5-SMC6 complex localization factor 1	5.6634	8.82768	5.3148	1.41452	1.08265
PDXDC2P	pyridoxal dependent decarboxylase domain containing 2, pseudogene	5.63832	3.1769	3.15358	0.16536	0.9574
RP11-446E9.1		5.63103	2.18059	1.73978	0.314732	0.381476
TRIM23	tripartite motif containing 23	5.61469	1.45115	1.21955	0.18385	0.291813
BDP1	B double prime 1, subunit of RNA polymerase III transcription initiation factor IIIB	5.61432	29.9004	20.9644	3.7635	5.29633
CCDC66	coiled-coil domain containing 66	5.59532	3.3037	3.66092	0.40531	0.839414
AC005540.3		5.5549	4.7792	3.63253	1.20208	0.312214
PAXBP1	PAX3 and PAX7 binding protein 1	5.54588	12.8695	8.76463	1.99129	1.90965
ESCO1	establishment of sister chromatid cohesion N-acetyltransferase 1	5.54039	4.52542	4.2959	0.543163	1.04902
RECQL	RecQ like helicase	5.53224	8.99261	15.5243	1.3938	3.03785
AC007906.1		5.52872	5.22797	6.54366	0.591884	1.53729
WDR19	WD repeat domain 19	5.51302	1.64513	1.29387	0.224104	0.308996
LTN1	listerin E3 ubiquitin protein ligase 1	5.51147	2.61967	2.18018	0.547625	0.323259
ELAVL2	ELAV like RNA binding protein 2	5.50817	0.276453	0.496346	0.0286565	0.111644
NR1D2	nuclear receptor subfamily 1 group D member 2	5.50721	4.32816	3.16174	0.664344	0.695675
C9orf72	C9orf72-SMCR8 complex subunit	5.5045	2.38135	2.34604	0.36447	0.494353
FAM133DP	family with sequence similarity 133, member A pseudogene	5.50308	3.92584	4.1634	0.639484	0.830462
HSP90B2P	heat shock protein 90 beta family member 2, pseudogene	5.50139	1.63912	1.54829	0.231692	0.34769
TRPM7	transient receptor potential cation channel subfamily M member 7	5.49393	2.96945	2.19625	0.49564	0.444616
USP53	ubiquitin specific peptidase 53	5.48827	2.37819	1.63752	0.283496	0.448195
ZNF721	zinc finger protein 721	5.48748	5.91818	3.82687	0.852879	0.922989
FNIP1	folliculin interacting protein 1	5.48664	1.30936	1.69159	0.097368	0.449587
ZFPM2-AS1	ZFPM2 antisense RNA 1	5.47516	3.25428	1.20189	0.482551	0.331339
HERC2P9	HERC2 pseudogene 9	5.46943	3.48597	3.13865	0.363362	0.847846
CEP295	centrosomal protein 295	5.45008	5.94536	6.74871	0.992823	1.33633
KNTC1	kinetochore associated 1	5.42034	4.54835	6.22377	0.754356	1.233
RP11-152F13.8		5.41864	23.2851	21.4013	2.43927	5.80754
SLC2A3P1	solute carrier family 2 member 3 pseudogene 1	5.41234	8.39085	10.6617	1.34504	2.17517
WRN	WRN RecQ like helicase	5.41086	5.73785	5.93972	0.901963	1.25621
ZNF180	zinc finger protein 180	5.39369	2.17414	1.6626	0.184773	0.526565
RP11-545J16.1		5.39303	1.18089	2.51702	0.136601	0.549082
USP16	ubiquitin specific peptidase 16	5.38735	19.4823	13.2271	3.39522	2.67631
ATP13A3	ATPase 13A3	5.38163	9.05091	4.58902	1.50535	1.02918
GEN1	GEN1 Holliday junction 5' flap endonuclease	5.37022	1.14958	0.656313	0.155676	0.180603
ZNF432	zinc finger protein 432	5.36541	1.63497	1.51461	0.246106	0.340911
OTUD6B	OTU deubiquitinase 6B	5.3499	38.6368	23.1211	5.67586	5.86788
ITGB1P1	integrin subunit beta 1 pseudogene 1	5.34896	5.19686	8.37839	0.967452	1.57047
HDX	highly divergent homeobox	5.34291	0.240275	0.157055	0.0304411	0.0439247
SPEF2	sperm flagellar 2	5.32406	0.124057	0.102576	0.0228151	0.0197525
XXbac-BPG283O16.9		5.31996	3.88652	2.3435	0.457066	0.714
OXTR	oxytocin receptor	5.31673	1.03738	0.450941	0.13868	0.141252
C1orf27	odr-4 GPCR localization factor homolog	5.31551	17.3486	11.0682	2.85693	2.48908
RGPD8	RANBP2 like and GRIP domain containing 8	5.31201	1.20062	0.938058	0.171124	0.231488
CEP85L	centrosomal protein 85 like	5.30808	0.488073	0.456073	0.0700513	0.107818
ZEB1	zinc finger E-box binding homeobox 1	5.30653	5.55918	3.92519	0.876956	0.910346
ZNF121	zinc finger protein 121	5.30123	4.20887	2.28324	0.639881	0.584762
WHAMMP2	WHAMM pseudogene 2	5.28765	0.708282	0.815401	0.0774419	0.210717
ZNF567	zinc finger protein 567	5.27566	1.59286	1.22949	0.26503	0.269945
THAP9-AS1	THAP9 antisense RNA 1	5.27135	13.6098	11.4315	1.30646	3.444
PTAR1	protein prenyltransferase alpha subunit repeat containing 1	5.26887	1.2362	1.09675	0.14488	0.2979
RIF1	replication timing regulatory factor 1	5.25887	6.03727	4.79286	0.934476	1.12493
CCDC88A	coiled-coil domain containing 88A	5.24796	6.3492	4.83554	0.911915	1.21934
NXT2	nuclear transport factor 2 like export factor 2	5.23434	1.67587	1.57671	0.288436	0.332956
ZNF146	zinc finger protein 146	5.23372	39.6557	31.1469	6.26162	7.26655
KIAA1109	KIAA1109	5.23286	1.36783	1.47437	0.194282	0.348864
CCDC144A	coiled-coil domain containing 144A	5.23163	0.141061	0.104602	0.014192	0.0327652
RP11-373L24.1		5.21502	1.2347	1.82778	0.167909	0.419334
CEP192	centrosomal protein 192	5.21341	1.30797	1.46928	0.178521	0.354192
RP11-20I23.13		5.21102	1.19431	0.786685	0.220831	0.159323
AHI1	Abelson helper integration site 1	5.21007	4.58916	2.99934	0.837574	0.618933
MYBL1	MYB proto-oncogene like 1	5.19149	4.1177	3.65549	0.590074	0.907223
G2E3	G2/M-phase specific E3 ubiquitin protein ligase	5.19103	0.968458	1.62191	0.143515	0.355494
CTAGE15	CTAGE family member 15	5.17869	1.12351	1.01764	0.142341	0.271114
RP11-178H8.7		5.16627	2.33604	2.37653	0.315431	0.596749
ZNF75A	zinc finger protein 75a	5.16529	1.67021	0.585696	0.278586	0.158157
THOC1	THO complex 1	5.16521	3.95015	4.73336	0.622666	1.05849
ZNF84	zinc finger protein 84	5.16279	2.88346	2.96779	0.410011	0.72334
CCDC14	coiled-coil domain containing 14	5.15916	5.43382	5.93753	0.764003	1.44011
ICE1	interactor of little elongation complex ELL subunit 1	5.15796	15.6152	9.99868	2.04529	2.92061
SMC5	structural maintenance of chromosomes 5	5.15559	19.371	18.5899	3.64519	3.71787
PABPC4L	poly(A) binding protein cytoplasmic 4 like	5.15498	0.522569	0.362314	0.0297926	0.141863
PNPLA8	patatin like phospholipase domain containing 8	5.14435	3.10526	5.23372	0.636683	0.984314
GCC2	GRIP and coiled-coil domain containing 2	5.14023	3.11957	3.90088	0.554489	0.811295
ZNF23	zinc finger protein 23	5.14009	1.07693	0.726283	0.13644	0.214374
SLC39A10	solute carrier family 39 member 10	5.13996	10.8925	10.2959	2.10816	2.01414
ZNF354B	zinc finger protein 354B	5.13952	1.11955	1.3317	0.196393	0.280549
ARHGAP12	Rho GTPase activating protein 12	5.13886	2.99126	2.555	0.520914	0.558366
PUS7L	pseudouridine synthase 7 like	5.13773	2.89657	1.86003	0.383006	0.542812
TH2LCRR	T helper type 2 locus control region associated RNA	5.13714	5.73598	4.92096	0.953804	1.12068
USPL1	ubiquitin specific peptidase like 1	5.13412	3.43427	2.89677	0.474217	0.758912
ZFP1	ZFP1 zinc finger protein	5.13358	2.60178	2.00614	0.372055	0.52555
EML6	EMAP like 6	5.12802	0.517128	0.368748	0.0357362	0.137016
NOL8	nucleolar protein 8	5.12724	30.3144	22.0804	4.7538	5.46512
HSP90AA1	heat shock protein 90 alpha family class A member 1	5.11668	2634.25	3078	537.416	578.983
C12orf4	chromosome 12 open reading frame 4	5.11469	1.94854	2.53327	0.372784	0.503479
PIK3C2A	phosphatidylinositol-4-phosphate 3-kinase catalytic subunit type 2 alpha	5.11287	9.18597	6.73798	1.55232	1.56216
RB1CC1	RB1 inducible coiled-coil 1	5.1099	9.78384	11.5406	1.67798	2.49518
NSUN6	NOP2/Sun RNA methyltransferase 6	5.10816	1.83724	1.93197	0.336866	0.401013
ATR	ATR serine/threonine kinase	5.10149	2.77824	2.58244	0.453812	0.596995
CEP135	centrosomal protein 135	5.09696	4.60125	3.34546	0.537011	1.0221
ZNF354A	zinc finger protein 354A	5.08793	1.01914	0.810443	0.0999624	0.259631
AGAP4	ArfGAP with GTPase domain, ankyrin repeat and PH domain 4	5.08058	3.52323	2.72656	0.413391	0.816744
CENPE	centromere protein E	5.0709	14.547	21.0883	1.87939	5.14801
RICTOR	RPTOR independent companion of MTOR complex 2	5.0668	1.92338	1.7346	0.347854	0.374096
WDR75	WD repeat domain 75	5.06603	6.05606	4.81631	1.12666	1.01947
SLC25A36	solute carrier family 25 member 36	5.06207	4.7309	6.86342	0.627157	1.66327
RP11-816J6.3		5.05981	2.52841	1.25562	0.218408	0.529451
GPBP1	GC-rich promoter binding protein 1	5.05862	4.74541	5.37613	0.887591	1.11326
USP12	ubiquitin specific peptidase 12	5.05823	6.403	5.41245	1.03489	1.301
SLC7A5P1	solute carrier family 7 member 5 pseudogene 1	5.05488	6.31462	3.38626	1.02859	0.890518
SNORD57	small nucleolar RNA, C/D box 57	5.05217	150.26	68.6055	29.152	14.1691
PPWD1	peptidylprolyl isomerase domain and WD repeat containing 1	5.05216	34.5948	25.7825	6.27864	5.67215
RLF	RLF zinc finger	5.048	3.78478	3.38932	0.624929	0.796248
RP11-261C10.4		5.04191	9.13253	6.78516	1.13187	2.0252
ADAMTS6	ADAM metallopeptidase with thrombospondin type 1 motif 6	5.02976	0.629535	0.396005	0.0773696	0.126525
AC010547.9		5.02741	2.06398	1.38766	0.270394	0.416172
DNAJB9	DnaJ heat shock protein family (Hsp40) member B9	5.01757	5.27052	6.5436	0.713888	1.64066
FER	FER tyrosine kinase	5.01662	1.35451	1.20412	0.24073	0.269301
MOB4	MOB family member 4, phocein	5.01175	3.47304	2.7545	0.411437	0.83115
USP34	ubiquitin specific peptidase 34	5.01102	5.91907	4.08494	0.930495	1.06591
AC009487.6		5.00879	2.35783	1.5717	0.3779	0.406628
FAR1	fatty acyl-CoA reductase 1	5.00469	6.7853	4.68927	1.21747	1.07529
FSBP	fibrinogen silencer binding protein	4.99778	6.2722	5.09207	1.04152	1.23234
DENND1B	DENN domain containing 1B	4.98746	0.912364	0.542689	0.122718	0.169025
KIAA1033	WASH complex subunit 4	4.97863	4.43434	4.75613	0.794067	1.05192
PTGS2	prostaglandin-endoperoxide synthase 2	4.97646	1.7223	1.31351	0.307504	0.302529
DYNC2H1	dynein cytoplasmic 2 heavy chain 1	4.96962	0.793577	1.03364	0.0953847	0.272292
PYROXD1	pyridine nucleotide-disulphide oxidoreductase domain 1	4.96671	3.3564	5.76472	0.488838	1.34761
SEPT7P6	septin 7 pseudogene 6	4.95639	2.76893	3.65674	0.515467	0.780975
ZBTB11	zinc finger and BTB domain containing 11	4.95086	6.6584	5.20415	1.19667	1.19939
GNL3LP1	G protein nucleolar 3 like pseudogene 1	4.94706	1.12039	0.858985	0.0896498	0.310462
RASA2	RAS p21 protein activator 2	4.9438	2.01539	1.8296	0.245778	0.531963
FAM76B	family with sequence similarity 76 member B	4.93483	4.39362	5.18376	0.62165	1.31912
ZNF678	zinc finger protein 678	4.93391	0.268066	0.307482	0.0165221	0.10013
POLK	DNA polymerase kappa	4.93384	3.32702	3.06133	0.594517	0.700286
ABCA5	ATP binding cassette subfamily A member 5	4.92626	0.667592	0.499166	0.139929	0.096916
RP11-485O10.3		4.9233	19.7668	16.1856	4.11182	3.19069
AHSA2	activator of HSP90 ATPase homolog 2, pseudogene	4.92217	7.81362	6.28165	1.04558	1.81805
MIS18BP1	MIS18 binding protein 1	4.92172	14.1012	23.8186	2.14461	5.55996
RABGGTB	Rab geranylgeranyltransferase subunit beta	4.91836	12.103	8.9459	2.36025	1.91941
DCLRE1A	DNA cross-link repair 1A	4.91342	2.40806	3.12117	0.432277	0.693055
ATRX	ATRX chromatin remodeler	4.91263	15.9115	21.8002	2.34655	5.32994
HSPH1	heat shock protein family H (Hsp110) member 1	4.90902	103.078	40.1157	16.744	12.4254
RP11-464F9.1		4.90893	4.98407	3.88232	0.67655	1.12963
CUL5	cullin 5	4.90349	4.57932	6.71471	0.742808	1.56045
CHML	CHM like Rab escort protein	4.90325	3.95833	3.09278	0.730609	0.707439
THAP5	THAP domain containing 5	4.89639	3.47619	5.56927	0.549274	1.2981
KIF18A	kinesin family member 18A	4.89251	7.39569	9.22712	1.14384	2.25377
CTC-432M15.3		4.89031	3.08146	3.23497	0.40896	0.882661
RIMKLB	ribosomal modification protein rimK like family member B	4.88976	6.34354	5.8885	0.80748	1.69408
CEP83	centrosomal protein 83	4.88712	10.0638	12.1457	1.3081	3.23639
SEC31B	SEC31 homolog B, COPII coat complex component	4.88361	0.537025	0.427385	0.0649447	0.132534
ESF1	ESF1 nucleolar pre-rRNA processing protein homolog	4.88178	72.8339	51.4625	14.5073	10.954
RAPGEF2	Rap guanine nucleotide exchange factor 2	4.87728	2.56905	1.2909	0.435565	0.355851
ZNF184	zinc finger protein 184	4.87602	2.00678	2.07771	0.306667	0.531002
NBN	nibrin	4.87519	15.9847	9.61561	2.93106	2.32009
RAD54B	RAD54 homolog B	4.87036	4.39471	3.44813	0.776256	0.834066
RAB11FIP2	RAB11 family interacting protein 2	4.8701	1.91078	2.22616	0.322334	0.527122
KIF14	kinesin family member 14	4.86709	9.10217	12.6211	1.69013	2.77317
FAM111B	FAM111 trypsin like peptidase B	4.86634	10.1574	8.59254	2.02087	1.83212
SMC6	structural maintenance of chromosomes 6	4.86627	21.1836	15.3522	3.73709	3.77089
ZNF131	zinc finger protein 131	4.84662	13.0643	11.4796	1.8334	3.23073
RRM2B	ribonucleotide reductase regulatory TP53 inducible subunit M2B	4.83828	1.95585	3.27273	0.345139	0.735528
SLK	STE20 like kinase	4.83678	35.9641	38.2263	6.27119	9.0676
ZHX1	zinc fingers and homeoboxes 1	4.83542	17.9415	9.28442	3.19018	2.44034
USP15	ubiquitin specific peptidase 15	4.83085	2.40656	1.6423	0.409615	0.428511
RAB27B	RAB27B, member RAS oncogene family	4.82904	1.26016	0.770543	0.128823	0.291695
TMEM56	TLC domain containing 4	4.82794	0.427572	0.311666	0.0497482	0.103368
RP11-219A15.1		4.82537	0.205465	0.16034	0.0251013	0.0507075
CCDC82	coiled-coil domain containing 82	4.82199	7.67059	8.72066	1.36543	2.03384
TMEM168	transmembrane protein 168	4.81153	0.351425	0.499021	0.0690875	0.107664
MAP4K5	mitogen-activated protein kinase kinase kinase kinase 5	4.81072	2.64461	4.89386	0.32861	1.2384
AC096649.2		4.81036	3.11901	4.47793	0.296367	1.28292
BACH1	BTB domain and CNC homolog 1	4.80119	1.59444	1.30129	0.276762	0.326365
BMS1P4	BMS1 pseudogene 4	4.7992	3.88508	3.1528	0.567582	0.898887
HSP90AA2P	heat shock protein 90 alpha family class A member 2, pseudogene	4.79915	58.8688	68.6302	12.7608	13.8062
ZC3H11B	zinc finger CCCH-type containing 11B	4.79549	0.823418	1.03214	0.111394	0.275545
RFX3	regulatory factor X3	4.79163	0.27758	0.332909	0.0560482	0.0713594
RP11-261C10.5		4.78603	9.95832	11.5758	1.00814	3.49124
TM7SF2	transmembrane 7 superfamily member 2	4.78409	0.596998	0.501719	0.108051	0.12161
DZIP3	DAZ interacting zinc finger protein 3	4.77943	2.20023	2.97799	0.406687	0.676753
LRRIQ1	leucine rich repeats and IQ motif containing 1	4.77419	0.205046	0.222582	0.0389668	0.050604
FAM13B	family with sequence similarity 13 member B	4.77399	3.03593	2.75473	0.454346	0.758614
KIF5B	kinesin family member 5B	4.76812	64.6389	48.19	12.1304	11.5328
PRPF40A	pre-mRNA processing factor 40 homolog A	4.76619	54.6328	44.9773	10.1945	10.7049
CEP170	centrosomal protein 170	4.76349	10.3388	10.0807	1.53839	2.74827
BRCA2	BRCA2 DNA repair associated	4.76283	2.49453	2.83724	0.270034	0.84942
AC084219.4		4.76171	4.38868	2.84012	0.823464	0.694645
PLK4	polo like kinase 4	4.76136	10.138	10.4457	1.57745	2.74562
PRPF4B	pre-mRNA processing factor 4B	4.75653	48.0127	34.3445	8.56048	8.75406
ZNF451	zinc finger protein 451	4.75565	2.13449	2.43697	0.390309	0.57096
ZNF519	zinc finger protein 519	4.74674	0.112511	0.137534	0.0163277	0.0363495
AHCTF1	AT-hook containing transcription factor 1	4.74291	27.6198	20.0003	5.04701	4.99326
FAM208A	transcription activation suppressor	4.74173	6.4103	7.76315	0.993309	1.99578
BOD1L1	biorientation of chromosomes in cell division 1 like 1	4.74164	18.3058	13.3513	2.82098	3.85541
ZNF550	zinc finger protein 550	4.74012	3.16789	1.95272	0.390894	0.689377
ZNF430	zinc finger protein 430	4.73876	0.806779	1.0547	0.15063	0.24219
SNX4	sorting nexin 4	4.73864	17.3574	16.07	3.01766	4.03655
TBC1D23	TBC1 domain family member 23	4.72715	2.73081	3.03021	0.577151	0.641559
ARL14	ADP ribosylation factor like GTPase 14	4.72678	3.09471	2.32814	0.654516	0.492744
TMX3	thioredoxin related transmembrane protein 3	4.72478	4.25409	3.33705	0.742548	0.864118
ZNF37BP	zinc finger protein 37B, pseudogene	4.72174	1.63741	1.36021	0.23697	0.397885
MBNL2	muscleblind like splicing regulator 2	4.71429	5.75752	9.5335	1.17794	2.06561
OSTM1	osteoclastogenesis associated transmembrane protein 1	4.71326	1.50406	1.30989	0.165966	0.431061
SACM1L	SAC1 like phosphatidylinositide phosphatase	4.70329	3.85235	3.30029	0.701212	0.819562
LRRC40	leucine rich repeat containing 40	4.70138	7.11067	5.87231	1.30236	1.45916
MAPK6	mitogen-activated protein kinase 6	4.70119	13.2	12.011	2.21357	3.14913
STAG2	stromal antigen 2	4.69878	35.0718	34.53	7.25048	7.56223
PGGT1B	protein geranylgeranyltransferase type I subunit beta	4.69231	2.03447	1.15963	0.351259	0.329449
ZNF292	zinc finger protein 292	4.68784	2.93723	2.49947	0.426355	0.733388
CH17-360D5.3		4.68698	5.94286	6.11157	0.757871	1.81403
ANKRD26	ankyrin repeat domain 26	4.68059	2.99726	3.41778	0.310689	1.05987
PHIP	pleckstrin homology domain interacting protein	4.67774	11.0151	11.1024	1.69224	3.03601
NPHP3-AS1	NPHP3 antisense RNA 1	4.66706	0.780276	1.02005	0.141222	0.244529
TOPBP1	DNA topoisomerase II binding protein 1	4.6628	14.9255	14.1723	2.70737	3.53304
SASS6	SAS-6 centriolar assembly protein	4.662	5.83777	4.30478	1.01979	1.15579
ANAPC4	anaphase promoting complex subunit 4	4.65955	2.87007	1.96293	0.501202	0.536022
TRAF5	TNF receptor associated factor 5	4.65779	0.551251	0.367009	0.0734677	0.123678
RP11-737O24.3		4.65751	2.625	0.971477	0.439357	0.332832
ATP11B	ATPase phospholipid transporting 11B (putative)	4.65353	2.75678	3.60655	0.424457	0.942965
DMTF1	cyclin D binding myb like transcription factor 1	4.6527	4.06042	4.2799	0.617833	1.17474
FGD4	FYVE, RhoGEF and PH domain containing 4	4.65026	0.607672	1.31758	0.0900757	0.323934
ZWILCH	zwilch kinetochore protein	4.64768	9.05771	8.88829	1.87573	1.98555
MIER1	MIER1 transcriptional regulator	4.64655	11.4845	9.79267	2.18992	2.38921
MPHOSPH9	M-phase phosphoprotein 9	4.64376	4.41608	7.37254	0.771924	1.76667
ZNF638	zinc finger protein 638	4.64322	14.4335	13.5616	3.02878	3.00046
TWISTNB	RNA polymerase I subunit F	4.63989	12.661	9.90018	2.41376	2.44867
GLCCI1	glucocorticoid induced 1	4.63956	1.28991	0.902717	0.278116	0.194478
ANKRD12	ankyrin repeat domain 12	4.63899	3.29484	3.95413	0.553016	1.0096
ELMOD2	ELMO domain containing 2	4.63597	1.06723	1.05253	0.216708	0.240535
KIF20B	kinesin family member 20B	4.63597	24.2717	33.8594	4.80519	7.73397
CEP120	centrosomal protein 120	4.63575	3.0338	5.52491	0.38301	1.46323
DNAJC10	DnaJ heat shock protein family (Hsp40) member C10	4.62913	4.47741	3.91827	0.823327	0.990333
FANCM	FA complementation group M	4.62838	1.03734	1.86536	0.156548	0.470603
TMTC3	transmembrane O-mannosyltransferase targeting cadherins 3	4.62814	3.99773	3.90792	0.829248	0.878923
NPHP3	nephrocystin 3	4.62743	1.43204	1.82111	0.21145	0.491565
ZNF267	zinc finger protein 267	4.62683	3.46762	2.57992	0.511682	0.795377
DHX29	DExH-box helicase 29	4.6207	8.70471	8.18691	1.89797	1.75767
SREK1	splicing regulatory glutamic acid and lysine rich protein 1	4.62019	36.2785	26.4249	5.97375	7.59784
ZNF224	zinc finger protein 224	4.62008	2.46848	1.60078	0.476883	0.403892
NOL11	nucleolar protein 11	4.61756	23.9966	15.6406	5.49268	3.09132
PRMT9	protein arginine methyltransferase 9	4.61614	2.49101	2.11371	0.458119	0.539407
AF230666.2		4.61368	5.00863	4.6851	0.918729	1.18235
RP13-516M14.10		4.61299	25.9796	14.0234	4.56637	4.10544
LCTL	lactase like	4.61041	6.68294	6.73501	1.36074	1.54962
DLG1	discs large MAGUK scaffold protein 1	4.6088	3.22037	7.47533	0.535568	1.78515
ZZZ3	zinc finger ZZ-type containing 3	4.6059	7.91594	5.3992	1.52478	1.36611
MYH3	myosin heavy chain 3	4.59864	2.27088	2.30638	0.308516	0.686834
TAF4B	TATA-box binding protein associated factor 4b	4.59738	2.44829	2.25375	0.443658	0.579109
PAPD5	terminal nucleotidyltransferase 4B	4.59475	3.46582	1.97956	0.488329	0.696799
TET2	tet methylcytosine dioxygenase 2	4.59438	1.1272	1.02803	0.178821	0.29028
OPA1-AS1	OPA1 antisense RNA 1	4.59031	15.3351	19.0585	2.29685	5.19582
EFCAB7	EF-hand calcium binding domain 7	4.58761	0.600148	0.413961	0.0645576	0.156496
ZBTB34	zinc finger and BTB domain containing 34	4.58649	1.37372	0.89154	0.15608	0.33782
POLR3G	RNA polymerase III subunit G	4.58377	34.3599	16.1466	6.79849	4.22007
EDEM3	ER degradation enhancing alpha-mannosidase like protein 3	4.58199	2.72709	2.40663	0.434107	0.686306
AGAP5	ArfGAP with GTPase domain, ankyrin repeat and PH domain 5	4.58177	2.98584	2.23921	0.413749	0.726651
WDR35	WD repeat domain 35	4.58008	2.62117	1.53783	0.46053	0.447532
HAUS3	HAUS augmin like complex subunit 3	4.56697	3.74723	2.32349	0.526275	0.802991
ZNF449	zinc finger protein 449	4.56345	0.721027	0.656874	0.11054	0.191403
PCM1	pericentriolar material 1	4.55473	10.2686	10.379	1.93996	2.59326
RP11-392E22.11		4.55149	5.49265	1.75239	0.63789	0.953906
ALKBH8	alkB homolog 8, tRNA methyltransferase	4.5508	4.59408	4.27649	0.817213	1.13202
HSPA13	heat shock protein family A (Hsp70) member 13	4.54781	2.91839	3.93455	0.579485	0.927378
ZFYVE16	zinc finger FYVE-type containing 16	4.5455	1.73576	1.13905	0.359851	0.272602
USP47	ubiquitin specific peptidase 47	4.54129	28.6826	16.6692	5.70935	4.27721
ZC3H12C	zinc finger CCCH-type containing 12C	4.53971	1.19622	0.488693	0.223541	0.14761
REV1	REV1 DNA directed polymerase	4.53647	3.25067	2.95197	0.464502	0.902782
SNORA40	small nucleolar RNA, H/ACA box 40	4.53561	1.50979	1.94967	0.265925	0.496808
LIFR	LIF receptor subunit alpha	4.53451	2.33554	1.19415	0.353835	0.424572
ZNF700	zinc finger protein 700	4.53347	1.98497	1.81537	0.377223	0.461062
CEP290	centrosomal protein 290	4.52987	7.94311	4.88834	1.32576	1.50687
C11orf65	chromosome 11 open reading frame 65	4.52985	0.357405	0.377381	0.0626963	0.0995136
RAD18	RAD18 E3 ubiquitin protein ligase	4.529	6.4608	4.04602	1.29724	1.02266
ZNF91	zinc finger protein 91	4.52024	0.385164	0.232328	0.0354176	0.101189
NAA16	N-alpha-acetyltransferase 16, NatA auxiliary subunit	4.51789	5.58704	4.75088	0.935184	1.35303
RASSF8	Ras association domain family member 8	4.51716	8.10018	7.62317	1.30495	2.17586
NEMF	nuclear export mediator factor	4.50891	9.30538	14.0857	2.23848	2.94927
CWC22	CWC22 spliceosome associated protein homolog	4.50815	48.9085	44.5485	10.6793	10.0514
TMEFF1	transmembrane protein with EGF like and two follistatin like domains 1	4.50801	0.766861	0.914736	0.141033	0.231992
MBTD1	mbt domain containing 1	4.50587	2.25135	2.01642	0.393754	0.553405
BLZF1	basic leucine zipper nuclear factor 1	4.50287	4.47223	2.45118	0.63622	0.901334
SGO2	shugoshin 2	4.50216	6.44608	8.20258	1.08844	2.16525
N4BP2L2	NEDD4 binding protein 2 like 2	4.50205	4.62523	6.73395	0.885852	1.63726
SLC30A9	solute carrier family 30 member 9	4.49923	5.31019	3.83162	1.03463	0.997232
BIRC3	baculoviral IAP repeat containing 3	4.49802	2.05332	1.15884	0.391845	0.322283
ZNF644	zinc finger protein 644	4.49568	5.10923	3.2159	0.895893	0.955913
MFN1	mitofusin 1	4.49282	5.63274	5.77712	1.13741	1.40217
PPIP5K2	diphosphoinositol pentakisphosphate kinase 2	4.49099	1.50721	0.768487	0.336893	0.169833
TAOK1	TAO kinase 1	4.48824	5.28736	4.60655	0.728666	1.47574
ZNF148	zinc finger protein 148	4.48486	4.5843	4.43018	0.800968	1.20901
RAPGEF6	Rap guanine nucleotide exchange factor 6	4.48404	1.87818	1.86142	0.278039	0.555939
ASPM	assembly factor for spindle microtubules	4.48208	11.754	18.8282	2.3667	4.45651
PAQR3	progestin and adipoQ receptor family member 3	4.47997	0.989438	0.702422	0.190012	0.187638
NR4A2	nuclear receptor subfamily 4 group A member 2	4.47952	3.15051	2.57928	0.668339	0.610769
ZNF702P	zinc finger protein 702, pseudogene	4.47716	0.534973	0.239024	0.0926575	0.0802194
PDS5A	PDS5 cohesin associated factor A	4.47386	17.5525	11.164	3.38847	3.03027
SENP6	SUMO specific peptidase 6	4.46939	7.08764	8.27012	1.27434	2.16187
SYDE2	synapse defective Rho GTPase homolog 2	4.46293	0.390481	0.201945	0.0684985	0.0642454
KIF27	kinesin family member 27	4.46041	2.42525	2.41837	0.465669	0.620244
TRAPPC13	trafficking protein particle complex subunit 13	4.45996	2.2495	1.80193	0.365677	0.542724
EIF4A2	eukaryotic translation initiation factor 4A2	4.45698	39.1507	48.9841	7.51723	12.2573
SLC16A7	solute carrier family 16 member 7	4.45499	1.47707	1.06259	0.266779	0.303291
RPGR	retinitis pigmentosa GTPase regulator	4.45436	2.59063	2.25317	0.453658	0.633772
NOC3L	NOC3 like DNA replication regulator	4.45378	26.9412	21.4985	5.63408	5.24201
AP1AR	adaptor related protein complex 1 associated regulatory protein	4.45347	16.8882	16.1709	2.68372	4.7395
KTN1	kinectin 1	4.45185	64.652	107.608	12.8396	25.8545
FAM95C	family with sequence similarity 95 member C	4.44644	4.9129	1.62413	0.849572	0.620602
NEXN-AS1	NEXN antisense RNA 1	4.44269	0.944044	1.33808	0.096397	0.417284
KLF6	Kruppel like factor 6	4.44239	2.06215	1.93198	0.275922	0.623174
GABRE	gamma-aminobutyric acid type A receptor subunit epsilon	4.44225	1.94535	1.09839	0.137916	0.547263
TWF1	twinfilin actin binding protein 1	4.43989	24.8371	18.0845	4.85113	4.81613
MYO5C	myosin VC	4.43525	1.03523	0.734918	0.183293	0.215816
RBBP6	RB binding protein 6, ubiquitin ligase	4.43521	29.7028	30.2141	6.89114	6.61824
FAM91A1	family with sequence similarity 91 member A1	4.43047	5.17447	4.43105	0.97573	1.19233
THAP9	THAP domain containing 9	4.4231	0.328017	0.363379	0.068003	0.0883117
ANKRD50	ankyrin repeat domain 50	4.42145	7.55038	2.87023	1.46139	0.895439
FAM227A	family with sequence similarity 227 member A	4.42008	0.22766	0.12839	0.0273248	0.0532279
ATAD2B	ATPase family AAA domain containing 2B	4.41929	3.20116	2.03839	0.547511	0.638097
CTDSPL2	CTD small phosphatase like 2	4.4183	5.34626	6.49241	0.9906	1.68886
HMMR	hyaluronan mediated motility receptor	4.41653	19.0027	28.4163	4.37842	6.35829
CCDC62	coiled-coil domain containing 62	4.41406	0.367723	0.393869	0.0657712	0.106767
NUP107	nucleoporin 107	4.41275	11.7573	11.662	2.96979	2.33739
DNAJC2	DnaJ heat shock protein family (Hsp40) member C2	4.40995	55.522	39.8674	9.5369	12.0936
RNF219-AS1	OBI1 antisense RNA 1	4.40115	1.32633	0.879986	0.222031	0.279272
RP11-392E22.9		4.39796	3.25725	1.40053	0.647797	0.411281
ASNSD1	asparagine synthetase domain containing 1	4.39646	11.7236	11.5434	2.52942	2.76281
RNF219	ORC ubiquitin ligase 1	4.3957	14.9165	10.5363	3.02603	2.76436
RP11-295P9.13		4.39559	7.11403	6.11567	1.38575	1.62402
MTX3	metaxin 3	4.39153	2.21935	1.70743	0.390751	0.503419
FANCB	FA complementation group B	4.38941	1.3159	1.77279	0.366518	0.33715
SLC35A3	solute carrier family 35 member A3	4.38862	1.14882	1.05109	0.227383	0.273891
JMJD1C	jumonji domain containing 1C	4.38443	5.43161	7.94659	1.06219	1.98911
CCDC68	coiled-coil domain containing 68	4.38312	1.86412	0.744009	0.398093	0.196945
SCFD1	sec1 family domain containing 1	4.38289	6.5022	8.81833	1.1376	2.35793
REV3L	REV3 like, DNA directed polymerase zeta catalytic subunit	4.3818	2.53939	2.83748	0.406023	0.821068
NPM1P9	nucleophosmin 1 pseudogene 9	4.37895	6.81098	4.9522	1.43979	1.24651
USP1	ubiquitin specific peptidase 1	4.37529	39.8552	32.514	7.61868	8.92176
LUC7L3	LUC7 like 3 pre-mRNA splicing factor	4.37327	132.467	109.731	25.5701	29.8115
GPR135	G protein-coupled receptor 135	4.37309	0.460705	0.599853	0.0887851	0.153734
TAF1D	TATA-box binding protein associated factor, RNA polymerase I subunit D	4.37301	18.767	19.7366	3.5949	5.20993
FGFR1OP	centrosomal protein 43	4.3724	2.33492	1.84948	0.408099	0.548903
NIPBL	NIPBL cohesin loading factor	4.36757	17.9117	16.6149	3.14187	4.76338
PMS1	PMS1 homolog 1, mismatch repair system component	4.36709	3.37886	3.1136	0.743502	0.743177
CWF19L2	CWF19 like cell cycle control factor 2	4.35923	14.2851	16.3329	3.44483	3.57888
THAP12	THAP domain containing 12	4.35834	7.65678	5.54966	1.39632	1.63384
THUMPD2	THUMP domain containing 2	4.35673	4.62078	3.78393	0.828363	1.10077
RPAP2	RNA polymerase II associated protein 2	4.35597	2.72043	1.17796	0.515557	0.379397
RP11-637A17.2		4.35015	8.71788	9.06277	2.31685	1.77052
SEPT7	septin 7	4.34841	46.7394	54.8213	10.1868	13.1691
UACA	uveal autoantigen with coiled-coil domains and ankyrin repeats	4.34689	18.2509	20.8076	3.72543	5.25996
RP3-468K18.5		4.34478	117.566	63.6843	25.9022	15.8148
SUCO	SUN domain containing ossification factor	4.33675	2.59373	2.40669	0.466476	0.686558
RAD50	RAD50 double strand break repair protein	4.33616	28.312	28.8711	5.90173	7.28577
LRRCC1	leucine rich repeat and coiled-coil centrosomal protein 1	4.33604	10.5524	14.634	1.35226	4.45635
SP3	Sp3 transcription factor	4.33579	3.65368	3.57767	0.598591	1.06924
TTK	TTK protein kinase	4.33496	4.92285	7.6935	1.14194	1.76843
GOLGA4	golgin A4	4.33467	56.2759	62.3271	10.4191	16.9424
UEVLD	UEV and lactate/malate dehyrogenase domains	4.33398	2.38331	1.42716	0.520806	0.358403
NUDT12	nudix hydrolase 12	4.33086	1.50069	1.04678	0.188225	0.399988
XRN1	5'-3' exoribonuclease 1	4.33049	2.61441	2.8246	0.516305	0.739675
ATAD2	ATPase family AAA domain containing 2	4.33035	36.183	31.2243	8.39111	7.17514
NCKAP1	NCK associated protein 1	4.32865	3.89344	4.02048	0.732548	1.09572
EPC2	enhancer of polycomb homolog 2	4.32719	5.09125	4.25926	0.653089	1.50779
EDRF1-AS1	EDRF1 antisense RNA 1	4.32676	1.47754	1.59651	0.277705	0.432767
PDPK2P	3-phosphoinositide dependent protein kinase 2, pseudogene	4.32346	1.60525	0.833964	0.124798	0.439384
AC108463.2		4.32208	11.2613	12.358	1.69792	3.76686
TPR	translocated promoter region, nuclear basket protein	4.32006	73.9772	60.7335	13.9155	17.2671
CTAGE6	CTAGE family member 6	4.31996	1.58502	1.11351	0.28239	0.342276
ZNF160	zinc finger protein 160	4.31686	1.87067	1.40949	0.302862	0.456988
ARAP2	ArfGAP with RhoGAP domain, ankyrin repeat and PH domain 2	4.31574	1.19533	1.08973	0.237037	0.292435
FAM179B	TOG array regulator of axonemal microtubules 1	4.31455	0.678963	1.02497	0.121861	0.273067
SNX13	sorting nexin 13	4.31402	0.934341	1.43655	0.188402	0.361175
NMD3	NMD3 ribosome export adaptor	4.31202	19.7987	15.0558	4.12177	3.96133
UHRF2	ubiquitin like with PHD and ring finger domains 2	4.31104	0.999545	0.872856	0.170772	0.263555
ZDHHC21	zinc finger DHHC-type palmitoyltransferase 21	4.31027	0.36317	0.423262	0.0742255	0.10823
RN7SK	RNA component of 7SK nuclear ribonucleoprotein	4.30836	144.79	115.204	36.2674	24.079
CEBPZ	CCAAT enhancer binding protein zeta	4.30684	56.7227	34.9261	12.9781	8.30176
TSC22D2	TSC22 domain family member 2	4.30679	2.77974	1.53416	0.403685	0.597965
ZNF195	zinc finger protein 195	4.30637	3.98805	2.70028	0.670811	0.882313
DNAJB14	DnaJ heat shock protein family (Hsp40) member B14	4.30531	1.92119	1.80965	0.408276	0.458292
TLR6	toll like receptor 6	4.3047	2.83616	0.800502	0.390508	0.454304
SOCS5	suppressor of cytokine signaling 5	4.29737	1.16759	0.851851	0.292599	0.177325
ATF3	activating transcription factor 3	4.2964	28.4098	33.6571	3.91935	10.5269
ZNF322	zinc finger protein 322	4.29593	1.50015	1.44314	0.174692	0.510441
SKIL	SKI like proto-oncogene	4.29552	5.02141	5.16865	0.856474	1.51578
LRRC39	leucine rich repeat containing 39	4.2939	1.5896	1.36317	0.351406	0.336259
VPS50	VPS50 subunit of EARP/GARPII complex	4.29383	1.02138	1.35215	0.249282	0.303496
IBTK	inhibitor of Bruton tyrosine kinase	4.29378	6.01685	4.77341	1.26658	1.24642
ATM	ATM serine/threonine kinase	4.29181	1.57154	1.71962	0.264004	0.502843
STAG1	stromal antigen 1	4.29122	11.1546	9.82403	2.36542	2.5233
TIA1	TIA1 cytotoxic granule associated RNA binding protein	4.29098	3.10874	3.45882	0.546196	0.984354
CCDC186	coiled-coil domain containing 186	4.28987	3.71402	6.39952	0.630724	1.72682
SCYL2	SCY1 like pseudokinase 2	4.28652	6.66098	7.31756	1.24534	2.01571
STXBP5	syntaxin binding protein 5	4.28367	1.66024	1.01028	0.280454	0.342965
LRRC49	leucine rich repeat containing 49	4.27907	0.28445	0.456373	0.0773993	0.0957278
TWSG1	twisted gastrulation BMP signaling modulator 1	4.27815	2.97097	4.8284	0.514784	1.30829
RP11-180C16.1		4.27621	0.65784	0.421913	0.0986964	0.153806
RP11-1391J7.1		4.2757	1.51994	0.816457	0.268003	0.278433
ERBIN	erbb2 interacting protein	4.27335	13.2486	14.7207	2.37897	4.16606
ROCK2	Rho associated coiled-coil containing protein kinase 2	4.27332	13.4686	9.38753	2.59889	2.74968
BIRC2	baculoviral IAP repeat containing 2	4.2727	3.49884	3.37761	0.617519	0.99187
SLC4A7	solute carrier family 4 member 7	4.27096	4.90332	5.22152	0.865447	1.50517
STXBP4	syntaxin binding protein 4	4.27045	0.234318	0.193915	0.0367115	0.0635668
EFR3A	EFR3 homolog A	4.26955	3.53851	3.70955	0.689292	1.00832
MAN2A1	mannosidase alpha class 2A member 1	4.26942	1.12341	2.09958	0.196351	0.55855
VGLL3	vestigial like family member 3	4.26855	0.248929	0.251895	0.0521335	0.0651954
PNISR	PNN interacting serine and arginine rich protein	4.26704	43.1003	49.6197	9.52265	12.2067
RNF6	ring finger protein 6	4.26646	20.7844	25.0673	3.94454	6.80247
EXOC5	exocyst complex component 5	4.25867	3.48501	4.29502	0.691084	1.13578
SSX2IP	SSX family member 2 interacting protein	4.2537	4.57562	4.19723	0.903648	1.15876
LAMTOR3	late endosomal/lysosomal adaptor, MAPK and MTOR activator 3	4.2532	2.6441	3.27537	0.758082	0.633688
RP11-214K3.25		4.25232	9.35522	8.23912	1.60738	2.5302
MBNL1	muscleblind like splicing regulator 1	4.25124	7.48447	7.36321	1.17228	2.32027
HAUS6	HAUS augmin like complex subunit 6	4.25049	5.46796	3.83568	1.09561	1.09323
KRR1	KRR1 small subunit processome component homolog	4.25025	11.0413	7.30466	2.10685	2.2096
SLC10A7	solute carrier family 10 member 7	4.24498	0.550561	0.418048	0.066081	0.162096
FAM101A	refilin A	4.24192	1.79133	1.68506	0.266922	0.552609
LHFPL5	LHFPL tetraspan subfamily member 5	4.24124	4.54809	2.15402	0.783482	0.796744
SECISBP2L	SECIS binding protein 2 like	4.23953	3.15188	2.42734	0.5757	0.7403
ECT2	epithelial cell transforming 2	4.23663	18.5758	41.1477	3.91071	10.1862
UGGT2	UDP-glucose glycoprotein glucosyltransferase 2	4.23579	2.95432	3.18072	0.602164	0.846219
TNPO1	transportin 1	4.23127	12.3738	8.60197	2.54571	2.4116
BCLAF1P2	BCL2 associated transcription factor 1 pseudogene 2	4.22435	24.187	15.4376	6.52071	2.85935
AGTPBP1	ATP/GTP binding carboxypeptidase 1	4.22255	3.83169	4.17083	0.894682	1.0005
RBAK	RB associated KRAB zinc finger	4.22162	5.60054	4.70282	0.9153	1.52532
ITGAV	integrin subunit alpha V	4.22103	2.41886	2.40633	0.417074	0.726058
SRFBP1	serum response factor binding protein 1	4.21919	6.79944	6.22027	1.23101	1.85483
MAP4K3	mitogen-activated protein kinase kinase kinase kinase 3	4.21889	2.29954	2.81829	0.424865	0.788212
ZMYM2	zinc finger MYM-type containing 2	4.2178	2.30033	2.1624	0.435351	0.622722
ID2	inhibitor of DNA binding 2	4.21775	3.808	3.16333	1.2191	0.433749
MCTP1	multiple C2 and transmembrane domain containing 1	4.21273	1.36776	1.31336	0.26196	0.374476
RP11-159H22.2		4.20876	0.942613	1.61879	0.163557	0.445033
SHOC2	SHOC2 leucine rich repeat scaffold protein	4.20686	4.19999	4.54693	0.581995	1.49721
NRIP1	nuclear receptor interacting protein 1	4.20682	2.26903	2.05064	0.494044	0.53278
RP11-407N17.4		4.20483	56.6072	51.8232	13.7568	12.0304
ERAP2	endoplasmic reticulum aminopeptidase 2	4.20414	0.430771	0.654564	0.0992283	0.15893
NFAT5	nuclear factor of activated T cells 5	4.20293	2.71338	2.34818	0.312084	0.892212
SMC2	structural maintenance of chromosomes 2	4.20152	22.6183	24.5055	5.30607	5.90983
BCLAF1	BCL2 associated transcription factor 1	4.2015	68.0632	47.7683	17.2097	10.3594
TBCAP3	tubulin folding cofactor A pseudogene 3	4.20046	16.3544	10.0038	2.59654	3.67852
VPS13A	vacuolar protein sorting 13 homolog A	4.20044	2.19712	2.25231	0.412069	0.647208
CCDC138	coiled-coil domain containing 138	4.19839	3.77775	2.79554	0.559089	1.00658
ACTRT3	actin related protein T3	4.19662	3.31806	2.20644	0.330586	0.985832
CHUK	component of inhibitor of nuclear factor kappa B kinase complex	4.19541	4.58224	3.80784	0.877006	1.12281
ZDBF2	zinc finger DBF-type containing 2	4.19429	1.88959	1.7455	0.27778	0.588896
SMC4	structural maintenance of chromosomes 4	4.19279	40.2109	55.6869	7.81582	15.0563
STXBP3	syntaxin binding protein 3	4.19115	3.161	2.51379	0.699618	0.654376
BAZ1A	bromodomain adjacent to zinc finger domain 1A	4.18924	43.3827	54.6409	9.40921	13.9897
BRIP1	BRCA1 interacting helicase 1	4.18912	1.89945	1.84085	0.410124	0.482736
TAF2	TATA-box binding protein associated factor 2	4.18865	20.6978	14.5217	3.43657	4.97175
PIGA	phosphatidylinositol glycan anchor biosynthesis class A	4.1878	0.562003	0.644059	0.116512	0.171482
XRCC2	X-ray repair cross complementing 2	4.18424	10.2947	7.23675	1.65414	2.53573
KLHL2	kelch like family member 2	4.18375	6.69749	6.0772	1.21731	1.83609
HOMER1	homer scaffold protein 1	4.18173	8.30196	7.20633	1.69338	2.0152
VPS54	VPS54 subunit of GARP complex	4.17972	4.60538	4.00366	0.882436	1.17728
IFT80	intraflagellar transport 80	4.179	2.05696	3.12826	0.405445	0.835337
CLOCK	clock circadian regulator	4.17899	4.76925	4.1627	0.839035	1.29831
PIK3CA	phosphatidylinositol-4,5-bisphosphate 3-kinase catalytic subunit alpha	4.17776	1.49618	1.75343	0.242595	0.535238
ADAM9	ADAM metallopeptidase domain 9	4.17755	38.9705	40.6501	7.96345	11.0957
RP11-574K11.29		4.17629	1.95069	1.54829	0.463385	0.374436
DOCK11	dedicator of cytokinesis 11	4.17626	0.634267	0.759178	0.153409	0.18025
TRMT13	tRNA methyltransferase 13 homolog	4.17588	10.2127	6.97395	1.87103	2.24467
SMC3	structural maintenance of chromosomes 3	4.17527	140.276	174.716	29.7432	45.6992
PPIG	peptidylprolyl isomerase G	4.17448	123.406	95.6626	28.0225	24.4556
EEA1	early endosome antigen 1	4.17396	14.2765	16.1132	3.11278	4.16803
RP11-463I20.1		4.17362	1.84382	2.56693	0.33978	0.717036
RALGAPA1P1	RALGAPA1 pseudogene 1	4.17314	0.290197	0.557445	0.0649968	0.138122
ZNF770	zinc finger protein 770	4.17292	2.8085	3.04889	0.501002	0.902666
APC	APC regulator of WNT signaling pathway	4.17205	1.92107	2.22318	0.355212	0.638123
MYO9A	myosin IXA	4.17189	1.15447	1.3374	0.216364	0.380936
WWP1	WW domain containing E3 ubiquitin protein ligase 1	4.1685	4.51596	4.48489	1.01707	1.14218
RP11-311C24.1		4.1678	4.88082	3.96513	0.556529	1.56592
PAPD4	terminal nucleotidyltransferase 2	4.16186	2.82608	3.01563	0.668548	0.735081
RP3-382I10.7		4.16039	0.585514	0.461314	0.12518	0.126438
KLF12	Kruppel like factor 12	4.1526	1.10281	0.608757	0.178674	0.233493
RBM41	RNA binding motif protein 41	4.14897	7.25719	5.23595	1.60549	1.40565
MTF2	metal response element binding transcription factor 2	4.14178	7.01751	4.74467	1.50186	1.33802
MTTP	microsomal triglyceride transfer protein	4.14145	1.71106	0.824576	0.293334	0.318923
RP11-517H2.6		4.14145	5.88725	4.74833	1.15117	1.41691
COG6	component of oligomeric golgi complex 6	4.13946	1.77298	2.22492	0.498544	0.467259
FAM228B	family with sequence similarity 228 member B	4.13855	0.5781	0.673547	0.12734	0.175096
PP2D1	protein phosphatase 2C like domain containing 1	4.13843	1.53602	2.16221	0.350284	0.543346
FBXL4	F-box and leucine rich repeat protein 4	4.1378	0.620823	0.565221	0.145207	0.141429
AC006978.6		4.13734	1.33471	2.11143	0.238727	0.594208
LTV1	LTV1 ribosome biogenesis factor	4.13655	239.876	139.671	55.2654	36.4891
NEDD4	NEDD4 E3 ubiquitin protein ligase	4.13364	3.44709	5.15842	0.914823	1.167
PDIK1L	PDLIM1 interacting kinase 1 like	4.13295	0.890153	0.81392	0.243596	0.168717
RP11-278C7.5		4.13238	9.58681	11.2869	2.21647	2.83479
MOSPD2	motile sperm domain containing 2	4.12955	0.924991	1.46836	0.286464	0.293102
CCDC144B	coiled-coil domain containing 144B (pseudogene)	4.12892	0.416834	0.47542	0.05281	0.163289
RP11-513D5.5		4.12774	32.547	21.4157	6.47291	6.60027
ASCC3	activating signal cointegrator 1 complex subunit 3	4.12503	8.53412	8.16463	1.73273	2.31542
ATP11C	ATPase phospholipid transporting 11C	4.12487	3.09998	2.26447	0.64629	0.654225
RBM39	RNA binding motif protein 39	4.12428	83.147	80.5973	18.3551	21.3474
REL	REL proto-oncogene, NF-kB subunit	4.12153	1.10184	1.51679	0.196305	0.439048
AL135791.1		4.1196	8.22685	8.97332	1.4969	2.67831
PKD2	polycystin 2, transient receptor potential cation channel	4.11875	3.84154	3.35185	0.656369	1.09013
RP11-423P10.2		4.11493	17.4509	11.1974	4.58964	2.37239
GLS	glutaminase	4.11468	2.97741	2.28957	0.569573	0.710475
MALT1	MALT1 paracaspase	4.11326	1.02093	1.32076	0.169694	0.399609
FASTKD1	FAST kinase domains 1	4.11237	1.67605	1.18294	0.430202	0.265015
YTHDC2	YTH domain containing 2	4.11109	2.24833	2.1856	0.612819	0.46571
CTC-428G20.6		4.10561	4.51579	3.13382	0.546113	1.3171
RSRP1	arginine and serine rich protein 1	4.10381	7.34274	6.45408	0.925462	2.43649
SPOPL	speckle type BTB/POZ protein like	4.10174	0.793888	0.696559	0.136637	0.226732
DIO2	iodothyronine deiodinase 2	4.09759	29.3213	15.5839	6.53037	4.42856
CDK6	cyclin dependent kinase 6	4.0969	2.26801	2.14956	0.30336	0.77491
UPF2	UPF2 regulator of nonsense mediated mRNA decay	4.09657	21.4733	21.3917	4.23977	6.22388
ZNF527	zinc finger protein 527	4.09654	0.421498	0.25302	0.0457721	0.118883
GNA13	G protein subunit alpha 13	4.09647	2.80934	2.73321	0.447309	0.905697
CMTR2	cap methyltransferase 2	4.0941	0.885955	0.873426	0.194269	0.235467
EPT1	selenoprotein I	4.09269	4.94693	2.7769	0.895617	0.991607
BMP2K	BMP2 inducible kinase	4.09119	2.68744	1.56486	0.477988	0.56139
PPP4R2	protein phosphatase 4 regulatory subunit 2	4.09077	2.54503	5.12869	0.395156	1.4807
MARCH7	membrane associated ring-CH-type finger 7	4.08748	5.33623	4.9637	1.17124	1.34864
NME7	NME/NM23 family member 7	4.08635	2.1391	1.92071	0.487815	0.505687
PI4K2B	phosphatidylinositol 4-kinase type 2 beta	4.08532	9.5607	10.3579	2.03882	2.83683
PIKFYVE	phosphoinositide kinase, FYVE-type zinc finger containing	4.08388	1.57717	1.79401	0.251565	0.57392
ATF2	activating transcription factor 2	4.08243	2.00473	2.77022	0.371374	0.798261
RAP2A	RAP2A, member of RAS oncogene family	4.08125	1.20018	1.37409	0.264443	0.366311
PARGP1	poly(ADP-ribose) glycohydrolase pseudogene 1	4.07923	4.24032	4.15469	0.847837	1.21015
KIF11	kinesin family member 11	4.07908	23.2044	25.9009	5.43262	6.6057
SPDL1	spindle apparatus coiled-coil protein 1	4.079	19.2944	20.0955	3.77718	5.87958
CSE1L	chromosome segregation 1 like	4.07889	66.6887	55.2026	17.5591	12.3243
MIER3	MIER family member 3	4.07883	1.84365	1.45522	0.255587	0.553193
THOC2	THO complex 2	4.07825	36.6282	21.843	9.377	4.9603
FAM169A	family with sequence similarity 169 member A	4.07773	3.76144	4.68829	0.515316	1.55685
DOPEY1	DOP1 leucine zipper like protein A	4.07522	0.983792	1.36716	0.23095	0.345941
PBLD	phenazine biosynthesis like protein domain containing	4.0743	0.630659	0.50377	0.0996773	0.178758
CENPJ	centromere protein J	4.07377	15.1194	27.6636	4.31468	6.18741
CRYZ	crystallin zeta	4.07373	5.19404	4.58434	1.37018	1.03017
MCM8	minichromosome maintenance 8 homologous recombination repair factor	4.07298	16.0193	9.2245	2.93976	3.25811
WDR36	WD repeat domain 36	4.07267	2.69967	2.24399	0.480978	0.732886
EPM2AIP1	EPM2A interacting protein 1	4.06888	0.763056	0.774874	0.126884	0.25109
MAP3K7	mitogen-activated protein kinase kinase kinase 7	4.06874	4.85293	3.83807	0.927342	1.2087
AC012358.8		4.0686	1.35555	1.09914	0.186409	0.416915
TXNDC16	thioredoxin domain containing 16	4.06477	1.24027	2.60582	0.23311	0.713091
HSPA4L	heat shock protein family A (Hsp70) member 4 like	4.06378	8.81498	5.89475	1.78716	1.83256
HMMR-AS1	HMMR antisense RNA 1	4.06253	16.1305	26.7436	3.42456	7.12898
CCDC39	coiled-coil domain containing 39	4.06217	0.436472	0.447935	0.047854	0.169864
UBR1	ubiquitin protein ligase E3 component n-recognin 1	4.06125	2.20221	1.7824	0.467343	0.513788
ARHGAP5	Rho GTPase activating protein 5	4.0603	4.34828	6.9397	0.882712	1.89737
LRRC58	leucine rich repeat containing 58	4.05697	4.79334	3.29342	1.08565	0.907645
RP11-355B11.2		4.05694	2.55002	1.46557	0.356418	0.633388
SMARCAD1	SWI/SNF-related, matrix-associated actin-dependent regulator of chromatin, subfamily a, containing DEAD/H box 1	4.05661	5.09002	3.53821	1.24826	0.878697
DIS3	DIS3 homolog, exosome endoribonuclease and 3'-5' exoribonuclease	4.05483	7.59456	7.07635	2.09693	1.5212
CCNJ	cyclin J	4.05469	1.66612	1.17121	0.34622	0.353545
KIF15	kinesin family member 15	4.05346	19.8413	30.607	4.68221	7.76353
ADGRG6	adhesion G protein-coupled receptor G6	4.05084	5.58383	5.24042	1.18211	1.48999
IFI44	interferon induced protein 44	4.04884	23.9437	44.4797	5.98068	10.9188
KIF21A	kinesin family member 21A	4.04792	16.9247	10.3846	3.77809	2.96842
TRAPPC8	trafficking protein particle complex subunit 8	4.0462	1.07602	0.939642	0.179842	0.318321
OXR1	oxidation resistance 1	4.04514	4.11953	5.18735	0.801079	1.49968
ARHGAP18	Rho GTPase activating protein 18	4.04497	8.12937	9.64545	1.66659	2.72771
DOK3	docking protein 3	4.04239	0.502407	0.388447	0.114573	0.105806
ICE2	interactor of little elongation complex ELL subunit 2	4.04225	1.5048	1.6715	0.276005	0.50977
CEP170P1	centrosomal protein 170 pseudogene 1	4.0417	2.54866	2.54425	0.48167	0.778422
LIN7C	lin-7 homolog C, crumbs cell polarity complex component	4.04128	2.77619	2.48365	0.526276	0.775252
RP11-488L18.8		4.04021	1.87547	2.72944	0.417265	0.722505
TMF1	TATA element modulatory factor 1	4.0388	2.95308	5.89424	0.641875	1.5487
ALCAM	activated leukocyte cell adhesion molecule	4.03593	4.87188	11.2774	0.861732	3.13965
ZNF24	zinc finger protein 24	4.03549	2.87864	2.41922	0.633276	0.679541
DUSP1	dual specificity phosphatase 1	4.03422	100.579	79.9701	31.4433	13.3112
BIVM	basic, immunoglobulin-like variable motif containing	4.03328	2.37731	1.79413	0.485498	0.548758
SLCO1B3	solute carrier organic anion transporter family member 1B3	4.0316	1.43147	3.64736	0.332681	0.927074
RP11-96C23.13		4.03104	0.609068	0.369017	0.088829	0.15381
MSH2	mutS homolog 2	4.03078	10.8122	7.57815	2.4754	2.08708
ZNF529	zinc finger protein 529	4.0291	0.766571	0.375247	0.135166	0.148227
AKAP11	A-kinase anchoring protein 11	4.02737	6.46872	5.38161	1.30665	1.63581
LARP7	La ribonucleoprotein 7, transcriptional regulator	4.02468	45.3455	41.7379	9.0819	12.5554
DNAJC27	DnaJ heat shock protein family (Hsp40) member C27	4.02073	0.4479	0.415024	0.0785711	0.136048
PNPT1	polyribonucleotide nucleotidyltransferase 1	4.02016	12.1278	7.23715	2.43865	2.37831
GLIPR1	GLI pathogenesis related 1	4.01931	8.86522	7.43739	1.97238	2.08369
EIF2A	eukaryotic translation initiation factor 2A	4.01812	36.5788	35.386	8.89615	9.01391
ANKRD18A	ankyrin repeat domain 18A	4.01689	5.99855	3.68494	1.29851	1.11218
KIF3A	kinesin family member 3A	4.0147	4.99015	7.08584	1.42786	1.58008
ETAA1	ETAA1 activator of ATR kinase	4.01245	6.8184	8.44738	1.49999	2.30462
PMAIP1	phorbol-12-myristate-13-acetate-induced protein 1	4.01144	15.75	24.4812	3.41051	6.6186
AKAP9	A-kinase anchoring protein 9	4.01132	7.84402	8.60422	1.68446	2.41599
ANLN	anillin actin binding protein	4.0111	103.518	123.334	25.6883	30.8677
CEP350	centrosomal protein 350	4.01084	5.48972	5.05008	1.04283	1.585
ZBED5	zinc finger BED-type containing 5	4.00819	1.84204	1.55106	0.203919	0.642625
TUG1_3		4.00704	58.8664	71.4589	11.8084	20.7156
GALNT1	polypeptide N-acetylgalactosaminyltransferase 1	4.00512	5.32996	7.61907	0.919513	2.31361
AC016644.1		4.00498	7.88766	7.19164	1.78179	1.98335
MKLN1-AS	MKLN1 antisense RNA	4.00149	0.975385	0.969665	0.122067	0.364013
RPAP3	RNA polymerase II associated protein 3	3.99915	31.6826	25.0172	7.24018	6.93776
CHORDC1	cysteine and histidine rich domain containing 1	3.99707	21.7561	13.3321	5.28076	3.49773
SSFA2	ITPR interacting domain containing 2	3.99504	18.7156	15.4737	3.25118	5.30677
NEDD1	NEDD1 gamma-tubulin ring complex targeting factor	3.99375	2.25043	4.28728	0.594063	1.04292
ANKRD28	ankyrin repeat domain 28	3.99284	7.03977	6.59982	1.24748	2.16853
DNAJC13	DnaJ heat shock protein family (Hsp40) member C13	3.99241	6.58594	8.78764	1.56352	2.28718
RSF1	remodeling and spacing factor 1	3.99183	10.3306	13.5841	2.0494	3.94152
AP000769.1		3.98855	13.8813	16.8924	1.8771	5.83841
Y_RNA		3.98733	0.138853	0.212792	0.0232831	0.0649076
BLM	BLM RecQ like helicase	3.98724	2.89869	3.21495	0.691392	0.841907
HERC2P3	HERC2 pseudogene 3	3.98663	2.52169	2.61805	0.395112	0.894132
CCDC18	coiled-coil domain containing 18	3.98579	11.9135	9.30866	2.56255	2.76189
FAM208B	transcription activation suppressor family member 2	3.98563	4.249	2.80569	0.769399	1.00063
SLC38A2	solute carrier family 38 member 2	3.9838	24.1355	27.7655	5.64458	7.38342
COPS2	COP9 signalosome subunit 2	3.98232	12.5008	7.89283	2.66738	2.45365
CENPC	centromere protein C	3.98121	3.06337	3.80341	0.743912	0.980883
PIBF1	progesterone immunomodulatory binding factor 1	3.97946	5.02683	5.30943	0.865827	1.73158
AC007620.3		3.97908	1.91339	1.8737	0.360458	0.591293
TAX1BP1	Tax1 binding protein 1	3.97841	19.2218	22.743	4.59643	5.95173
AC009501.4		3.97627	4.68302	7.29901	0.681332	2.33205
UBA6	ubiquitin like modifier activating enzyme 6	3.97612	2.85602	1.85891	0.586241	0.599573
NUF2	NUF2 component of NDC80 kinetochore complex	3.97571	13.2656	23.2738	2.6287	6.56197
RP11-432I5.8		3.97466	4.90448	3.35328	0.805665	1.27194
CAMSAP2	calmodulin regulated spectrin associated protein family member 2	3.97314	18.3046	21.5987	3.54174	6.50155
ATP6V1C1	ATPase H+ transporting V1 subunit C1	3.9691	3.18477	3.03366	0.792989	0.77372
CLASP2	cytoplasmic linker associated protein 2	3.96796	2.1677	2.02158	0.401862	0.653917
PHF20L1	PHD finger protein 20 like 1	3.96589	4.34239	3.43166	0.794793	1.16543
CPEB4	cytoplasmic polyadenylation element binding protein 4	3.96116	0.446442	0.406898	0.0788668	0.13656
FAM102B	family with sequence similarity 102 member B	3.96064	0.918269	0.557028	0.236175	0.136314
DST	dystonin	3.96006	5.72505	8.01572	1.24714	2.2227
PRPF18	pre-mRNA processing factor 18	3.95807	15.5846	13.0246	3.67249	3.55558
ARID4A	AT-rich interaction domain 4A	3.95612	8.46201	15.3491	1.90736	4.11144
UFL1	UFM1 specific ligase 1	3.95331	17.0332	13.7288	4.28352	3.4978
CXorf23	BCLAF1 and THRAP3 family member 3	3.95038	1.11516	1.40892	0.136542	0.502405
CEP97	centrosomal protein 97	3.95032	1.46087	1.68528	0.362453	0.433976
RP11-64B16.2		3.94921	197.028	53.9327	31.9589	31.5881
HNRNPA1P33	heterogeneous nuclear ribonucleoprotein A1 pseudogene 33	3.94766	6.44744	5.999	1.05023	2.10264
CEP70	centrosomal protein 70	3.94714	7.13115	11.9799	1.35798	3.48378
METTL14	methyltransferase 14, N6-adenosine-methyltransferase subunit	3.94708	5.85466	5.90512	1.25572	1.72365
CAPZA1	capping actin protein of muscle Z-line subunit alpha 1	3.94691	21.0033	14.28	4.54723	4.39226
PKN2	protein kinase N2	3.94599	9.01837	8.736	2.04487	2.45448
DDX60L	DExD/H-box 60 like	3.94529	2.043	2.04961	0.381686	0.655654
CFAP53	cilia and flagella associated protein 53	3.94012	4.04775	4.06156	0.576924	1.48121
FAM135A	family with sequence similarity 135 member A	3.93809	1.27178	1.38151	0.264293	0.409458
ZNF268	zinc finger protein 268	3.93566	0.467409	0.77022	0.0679258	0.24654
NCAPG	non-SMC condensin I complex subunit G	3.93464	17.6141	11.5821	4.26529	3.15501
XPO1	exportin 1	3.93207	15.4412	13.4127	3.32444	4.01366
PRKD3	protein kinase D3	3.93065	6.63928	5.09483	1.41989	1.5654
ZNF331	zinc finger protein 331	3.92968	1.36651	0.97282	0.285898	0.3094
AGAP6	ArfGAP with GTPase domain, ankyrin repeat and PH domain 6	3.92966	11.0681	5.23917	1.67804	2.47175
MLH3	mutL homolog 3	3.92892	1.11215	1.60643	0.184933	0.507008
ALMS1	ALMS1 centrosome and basal body associated protein	3.9282	2.62421	1.59901	0.539752	0.53535
SLC7A11	solute carrier family 7 member 11	3.92747	17.2841	11.9059	4.10042	3.33184
ZNF845	zinc finger protein 845	3.9262	2.82478	2.59536	0.65086	0.729647
CASC5	kinetochore scaffold 1	3.92272	4.39209	5.60024	0.880175	1.66712
ATAD1	ATPase family AAA domain containing 1	3.92184	6.59662	7.08109	1.37353	2.11404
PLS1	plastin 1	3.92032	1.97038	3.34772	0.639927	0.716619
TMEM267	transmembrane protein 267	3.91977	1.26806	1.08287	0.256529	0.343236
ZNF107	zinc finger protein 107	3.91774	1.19042	1.1217	0.185095	0.405072
RINT1	RAD50 interactor 1	3.9163	6.32641	4.81922	1.05786	1.7881
KIAA1524	cellular inhibitor of PP2A	3.91568	27.6963	27.2829	5.53279	8.50797
SBNO1	strawberry notch homolog 1	3.91089	7.84724	8.74434	1.86369	2.37872
RP11-96D1.8		3.90894	0.692713	0.4316	0.122564	0.165062
STYK1	serine/threonine/tyrosine kinase 1	3.90855	0.499889	0.491448	0.0860365	0.167596
FPGT	fucose-1-phosphate guanylyltransferase	3.907	0.664437	0.454508	0.0880948	0.1983
CD46	CD46 molecule	3.90485	5.60003	9.91749	1.04872	2.92519
RP11-361D15.2		3.90449	54.5476	78.4513	10.3509	23.7121
GPR158	G protein-coupled receptor 158	3.90367	1.09516	0.836069	0.181115	0.313606
RBBP8	RB binding protein 8, endonuclease	3.9033	19.6014	17.9498	3.9782	5.64218
LGR4	leucine rich repeat containing G protein-coupled receptor 4	3.90293	2.9646	3.00516	0.493692	1.03587
PIGN	phosphatidylinositol glycan anchor biosynthesis class N	3.90076	1.32581	1.57349	0.260085	0.483181
HLTF	helicase like transcription factor	3.89938	10.9579	15.2553	2.76911	3.95331
DDIAS	DNA damage induced apoptosis suppressor	3.8985	2.24412	1.80463	0.441415	0.597126
IPMK	inositol polyphosphate multikinase	3.89796	1.07421	1.50462	0.204142	0.457441
ZNF765	zinc finger protein 765	3.89647	0.609582	0.439738	0.101426	0.167874
CDC40	cell division cycle 40	3.89642	7.26713	9.63113	1.67211	2.66475
PLAG1	PLAG1 zinc finger	3.89503	0.449397	0.464298	0.0799185	0.154661
ZFX	zinc finger protein X-linked	3.89295	3.31274	2.91919	0.546018	1.05481
MATR3	matrin 3	3.89278	29.3308	29.756	7.39296	7.78562
AC019097.7		3.89241	3.69083	5.16964	0.801603	1.47475
TATDN2P2	TatD DNase domain containing 2 pseudogene 2	3.89082	1.46531	1.07294	0.165425	0.486944
SUZ12	SUZ12 polycomb repressive complex 2 subunit	3.89072	13.4911	11.0892	2.95287	3.36482
SLC25A24	solute carrier family 25 member 24	3.88996	7.44732	4.37699	1.53526	1.50444
ZNF431	zinc finger protein 431	3.88977	0.450189	0.501253	0.0911992	0.153402
CDKN2AIP	CDKN2A interacting protein	3.88759	5.52237	6.17953	0.853413	2.15665
HELLS	helicase, lymphoid specific	3.88717	13.6365	16.1993	2.69609	4.97937
GPR89B	G protein-coupled receptor 89B	3.8866	1.02354	0.754639	0.221959	0.235555
KIAA0232	KIAA0232	3.88579	5.75674	2.66967	1.20449	0.964031
JAK2	Janus kinase 2	3.88538	0.795592	1.12609	0.143236	0.351358
RASAL2	RAS protein activator like 2	3.88305	2.60467	2.65249	0.360341	0.993534
PTPN4	protein tyrosine phosphatase non-receptor type 4	3.88198	0.607822	0.59559	0.0648823	0.245117
UBR3	ubiquitin protein ligase E3 component n-recognin 3	3.88174	2.71824	2.58649	0.622083	0.744502
SMG1P4	SMG1 pseudogene 4	3.88155	0.754742	0.591139	0.128795	0.217943
STK38L	serine/threonine kinase 38 like	3.88108	11.4882	13.0586	2.57515	3.74957
TTC21B	tetratricopeptide repeat domain 21B	3.87891	1.2253	1.35019	0.283334	0.380638
KITLG	KIT ligand	3.87746	1.70563	2.30066	0.304831	0.728396
CLK4	CDC like kinase 4	3.87664	2.41681	1.82216	0.35318	0.740285
CEP57	centrosomal protein 57	3.87463	12.484	15.3418	2.92992	4.25164
RANBP2	RAN binding protein 2	3.86901	15.3519	11.3288	3.68775	3.20827
ERGIC2	ERGIC and golgi 2	3.86618	10.2161	10.095	2.32597	2.92758
NOP58	NOP58 ribonucleoprotein	3.86446	116.884	72.8412	29.4678	19.627
LARP4	La ribonucleoprotein 4	3.86442	12.5246	6.77512	2.62831	2.36589
C5orf42	ciliogenesis and planar polarity effector 1	3.86415	2.56934	2.1109	0.539736	0.671457
NCOA7	nuclear receptor coactivator 7	3.86333	17.9314	34.2347	5.01498	8.48789
DENND4A	DENN domain containing 4A	3.86249	1.31331	1.88807	0.294645	0.534193
SCLT1	sodium channel and clathrin linker 1	3.86186	4.53731	6.44148	0.985872	1.85701
TFRC	transferrin receptor	3.85992	20.1458	14.6009	4.21602	4.78592
TOPORS	TOP1 binding arginine/serine rich protein, E3 ubiquitin ligase	3.85927	26.534	18.1467	6.67642	4.90111
ERO1B	endoplasmic reticulum oxidoreductase 1 beta	3.85913	0.385537	0.430321	0.068688	0.142722
RANBP6	RAN binding protein 6	3.85843	2.76933	2.7419	0.690996	0.737363
NPM1P21	nucleophosmin 1 pseudogene 21	3.85594	2.96671	3.2412	0.7732	0.836759
ARID2	AT-rich interaction domain 2	3.85384	1.61114	1.68524	0.340088	0.515262
FNBP1L	formin binding protein 1 like	3.85344	12.6439	7.12921	2.71192	2.41936
ZNF92	zinc finger protein 92	3.85139	1.05749	1.39876	0.220187	0.41757
CTNNAL1	catenin alpha like 1	3.84662	81.8044	77.5038	16.6418	24.7733
MTBP	MDM2 binding protein	3.84608	1.37697	1.2387	0.274209	0.405878
WHAMMP3	WHAMM pseudogene 3	3.84408	0.559793	0.937171	0.0911852	0.298236
DLGAP5	DLG associated protein 5	3.84124	17.5168	35.2155	4.72973	8.99819
IL6	interleukin 6	3.84095	1.74819	4.57809	0.676316	0.970746
FIGNL1	fidgetin like 1	3.8407	6.03682	6.49671	1.28744	1.97591
COPB1	COPI coat complex subunit beta 1	3.83887	45.3927	23.8928	11.1454	6.903
ZC3H11A	zinc finger CCCH-type containing 11A	3.83712	16.5802	19.642	3.31033	6.12961
LYSMD3	LysM domain containing 3	3.83439	3.02741	2.36164	0.776278	0.629174
IPO11	importin 11	3.83358	2.25721	1.48662	0.503028	0.473557
CASC2	cancer susceptibility 2	3.83346	0.167397	0.227254	0.0330356	0.0699134
CFAP97	cilia and flagella associated protein 97	3.83331	4.976	3.65764	1.08556	1.1667
FAM63B	MINDY lysine 48 deubiquitinase 2	3.83175	0.98722	1.22584	0.132431	0.445127
CSNK1G3	casein kinase 1 gamma 3	3.82959	5.41906	7.53967	1.03106	2.35278
SEC62	SEC62 homolog, preprotein translocation factor	3.82939	51.1021	77.574	13.6045	19.9977
USP37	ubiquitin specific peptidase 37	3.82892	2.07535	1.66817	0.432053	0.545641
ZYG11B	zyg-11 family member B, cell cycle regulator	3.82581	0.697264	0.860766	0.107803	0.299439
SACS	sacsin molecular chaperone	3.82368	4.28038	3.52401	0.846956	1.19411
OPA1	OPA1 mitochondrial dynamin like GTPase	3.82342	8.74649	11.405	2.01379	3.25674
INTS2	integrator complex subunit 2	3.82214	2.93177	3.12167	0.619058	0.964723
ZNF260	zinc finger protein 260	3.82163	1.39445	1.45005	0.197977	0.54634
USP24	ubiquitin specific peptidase 24	3.81701	7.91457	5.51481	1.57655	1.94176
CCPG1	cell cycle progression 1	3.81521	11.4917	12.6801	2.86803	3.46762
PSD3	pleckstrin and Sec7 domain containing 3	3.81475	0.929803	0.706481	0.13555	0.293386
KIAA0895	KIAA0895	3.80924	1.68002	1.60552	0.459748	0.402771
ITSN2	intersectin 2	3.8079	9.6304	8.10697	1.92664	2.7314
ERCC6L2	ERCC excision repair 6 like 2	3.80712	2.05898	2.43301	0.369944	0.809948
PRPF39	pre-mRNA processing factor 39	3.80682	6.26644	9.42108	1.27673	2.84417
CAPN7	calpain 7	3.8068	5.70552	3.87862	1.27613	1.24151
ZBTB33	zinc finger and BTB domain containing 33	3.80463	1.67157	1.4099	0.311889	0.49804
SLC12A2	solute carrier family 12 member 2	3.80175	1.2689	1.4176	0.186466	0.520181
PDE4D	phosphodiesterase 4D	3.80057	0.991488	0.856581	0.180885	0.305377
DEK	DEK proto-oncogene	3.80025	287.157	368.331	57.3253	115.16
CRYBG3	crystallin beta-gamma domain containing 3	3.80018	1.4302	2.40637	0.262809	0.746767
CENPF	centromere protein F	3.79939	55.0613	81.0434	11.3274	24.4954
MAP9	microtubule associated protein 9	3.79643	2.34818	1.76198	0.557115	0.525523
CCDC126	coiled-coil domain containing 126	3.79618	0.391176	0.45107	0.114101	0.107765
DICER1	dicer 1, ribonuclease III	3.79556	6.60395	6.69133	1.21308	2.28978
MYO5A	myosin VA	3.7943	2.83959	2.23804	0.442292	0.895934
CEP78	centrosomal protein 78	3.79379	3.25085	2.74337	0.602825	0.977181
MAN1A2	mannosidase alpha class 1A member 2	3.79327	6.45093	5.40173	1.26466	1.86
TDG	thymine DNA glycosylase	3.79268	11.7968	9.54323	2.58359	3.04305
CEP55	centrosomal protein 55	3.79264	59.3568	89.935	14.4323	24.9313
NR2C1	nuclear receptor subfamily 2 group C member 1	3.79236	5.91584	3.60822	1.13928	1.3721
RALGAPA1	Ral GTPase activating protein catalytic subunit alpha 1	3.79033	0.924131	1.68844	0.237605	0.451667
PSMC6	proteasome 26S subunit, ATPase 6	3.78859	10.9505	11.4483	2.11138	3.80078
TRA2A	transformer 2 alpha homolog	3.78743	14.2736	18.6495	4.03217	4.66058
ZNF235	zinc finger protein 235	3.78609	0.765713	0.67523	0.178308	0.202281
ATG5	autophagy related 5	3.78582	4.50706	4.60989	0.896356	1.51182
PCF11	PCF11 cleavage and polyadenylation factor subunit	3.78558	6.86397	7.76226	1.59861	2.26505
PHLDB2	pleckstrin homology like domain family B member 2	3.7846	11.7722	9.42268	2.4541	3.14619
ROCK1	Rho associated coiled-coil containing protein kinase 1	3.78434	13.4404	13.5276	2.737	4.3892
MYNN	myoneurin	3.78359	4.28906	5.94441	0.668352	2.03635
TROVE2	Ro60, Y RNA binding protein	3.78345	1.80598	2.23339	0.412658	0.654983
U1	RNA, U1 small nuclear 1	3.78208	0.536375	0.932992	0.142231	0.246277
BBX	BBX high mobility group box domain containing	3.78189	8.54613	10.226	1.72383	3.23986
CDC7	cell division cycle 7	3.78035	6.4644	4.60101	1.70815	1.21894
DCAF17	DDB1 and CUL4 associated factor 17	3.77995	2.49265	1.97786	0.529006	0.653682
ESCO2	establishment of sister chromatid cohesion N-acetyltransferase 2	3.77862	2.56398	2.30455	0.572699	0.715743
CCP110	centriolar coiled-coil protein 110	3.7782	3.75424	5.21832	0.784254	1.59057
RP11-4K16.2		3.77671	10.1894	7.55996	2.09032	2.60936
AC096949.1		3.77347	2.61312	2.84058	0.688217	0.757057
ACADM	acyl-CoA dehydrogenase medium chain	3.77117	16.8395	13.0454	4.36525	3.55932
EVI5	ecotropic viral integration site 5	3.76974	2.27499	1.82993	0.507237	0.581677
RP1-100J12.1		3.76643	10.7141	8.23607	3.12654	1.90481
INO80D	INO80 complex subunit D	3.76579	0.575207	0.483406	0.094794	0.186319
RP11-362K14.5		3.76011	2.29135	3.4282	0.374915	1.1462
UHRF1BP1L	UHRF1 binding protein 1 like	3.75993	5.59886	5.36987	1.16326	1.75401
TAF9B	TATA-box binding protein associated factor 9b	3.75854	4.04986	4.41485	0.949947	1.30218
CARNMT1	carnosine N-methyltransferase 1	3.75825	6.05964	4.94536	1.30999	1.61823
SHPRH	SNF2 histone linker PHD RING helicase	3.75632	2.24124	1.53423	0.471857	0.53324
ZMYM6	zinc finger MYM-type containing 6	3.75529	0.555587	0.537662	0.138218	0.152904
BTBD1	BTB domain containing 1	3.7485	6.97951	5.9242	1.14825	2.29411
PARPBP	PARP1 binding protein	3.7482	2.15071	1.72167	0.488912	0.54422
TOP2B	DNA topoisomerase II beta	3.74756	67.9948	70.0459	16.2402	20.5946
DDX3X	DEAD-box helicase 3 X-linked	3.74738	42.8318	29.3233	11.8167	7.43808
DBT	dihydrolipoamide branched chain transacylase E2	3.74641	1.02573	1.04932	0.175925	0.377952
LIN9	lin-9 DREAM MuvB core complex component	3.74392	3.24983	3.23219	0.547132	1.18422
PHF6	PHD finger protein 6	3.74327	3.76691	3.37226	0.904972	1.00223
CTAGE4	CTAGE family member 4	3.74165	2.94496	1.90865	0.853717	0.44347
ZNF136	zinc finger protein 136	3.74145	0.761977	0.375216	0.162906	0.141038
RP11-188P20.3		3.74121	6.00207	5.79703	0.766095	2.38772
BRCA1	BRCA1 DNA repair associated	3.74101	9.33876	7.2521	2.0265	2.40837
PIGK	phosphatidylinositol glycan anchor biosynthesis class K	3.74077	2.90553	2.44182	0.654583	0.774894
UHMK1	U2AF homology motif kinase 1	3.73966	4.07614	4.20935	0.836358	1.37921
CTD-2013N24.2		3.73886	1.98286	4.05008	0.481676	1.1319
IFT74	intraflagellar transport 74	3.73839	8.29085	6.96043	1.67692	2.40271
NAA25	N-alpha-acetyltransferase 25, NatB auxiliary subunit	3.73656	6.71213	4.46984	1.65794	1.33465
PHLPP2	PH domain and leucine rich repeat protein phosphatase 2	3.7356	2.12489	1.03409	0.368443	0.4772
QSER1	glutamine and serine rich 1	3.73547	6.0317	4.47664	1.36992	1.4432
SUCLA2	succinate-CoA ligase ADP-forming subunit beta	3.73472	15.6511	14.1253	3.95641	4.01644
BMS1P1	BMS1 pseudogene 1	3.73229	1.47277	0.946143	0.193766	0.454338
KLHL8	kelch like family member 8	3.72965	2.25721	1.91542	0.615897	0.502875
ZNF280C	zinc finger protein 280C	3.72772	1.23353	1.0718	0.301963	0.316466
PGM3	phosphoglucomutase 3	3.72748	3.71158	2.92682	0.898627	0.882311
NPM1P19	nucleophosmin 1 pseudogene 19	3.72646	2.40396	2.6302	0.72406	0.626864
BTBD8	BTB domain containing 8	3.72477	0.30046	0.560251	0.0642366	0.166841
MIB1	MIB E3 ubiquitin protein ligase 1	3.72417	1.98603	2.23985	0.546868	0.58785
CD2AP	CD2 associated protein	3.72362	8.3619	9.19428	1.84364	2.87118
CLVS1	clavesin 1	3.72318	0.63777	0.264321	0.134484	0.107806
ARID4B	AT-rich interaction domain 4B	3.72298	24.0964	25.4273	5.28095	8.02124
RP11-793J2.1		3.72262	0.963423	1.04582	0.183088	0.35665
DCUN1D4	defective in cullin neddylation 1 domain containing 4	3.71929	2.15157	1.91497	0.482933	0.610434
STAM2	signal transducing adaptor molecule 2	3.71903	2.75692	2.59202	0.441568	0.996693
TAB3	TGF-beta activated kinase 1 (MAP3K7) binding protein 3	3.71711	1.64129	2.0498	0.353433	0.639567
CEP95	centrosomal protein 95	3.717	6.30406	4.61674	1.17133	1.76674
NR3C1	nuclear receptor subfamily 3 group C member 1	3.71519	4.20409	5.0541	0.827046	1.66493
DENND4C	DENN domain containing 4C	3.71321	1.30361	1.36557	0.35792	0.360912
HIPK3	homeodomain interacting protein kinase 3	3.71263	3.5874	2.31231	0.795887	0.793208
AC006460.2		3.71175	12.4586	17.7319	2.7495	5.38427
RP3-468K18.7		3.71129	77.5851	45.1376	20.4302	12.6371
RP3-430N8.10		3.711	10.0309	9.97212	2.37122	3.01899
ACSL4	acyl-CoA synthetase long chain family member 4	3.70976	7.73262	4.8612	1.92872	1.46606
ARL13B	ADP ribosylation factor like GTPase 13B	3.70933	6.09511	6.56628	1.07262	2.34077
GPR180	G protein-coupled receptor 180	3.70908	1.06893	0.750659	0.208703	0.281873
CTC-436P18.1		3.70846	10.8325	9.37647	2.40556	3.04387
FXR1	FMR1 autosomal homolog 1	3.70769	34.5908	38.9299	9.05164	10.7776
MIR302B	microRNA 302b	3.70657	52.1491	46.2904	11.176	15.382
TBC1D15	TBC1 domain family member 15	3.70597	4.7341	4.44701	1.42335	1.05403
IL7R	interleukin 7 receptor	3.70397	7.86052	10.0591	1.94448	2.89345
WDHD1	WD repeat and HMG-box DNA binding protein 1	3.70197	7.5818	11.6596	2.08196	3.11565
SLC25A16	solute carrier family 25 member 16	3.70131	0.235547	0.236156	0.0376953	0.0897469
RP1-313I6.12		3.70121	4.33107	4.2333	0.966218	1.34772
CTD-3092A11.2		3.6965	0.947825	1.20061	0.187956	0.393252
HCFC2	host cell factor C2	3.69527	1.00131	0.773386	0.141358	0.338904
CREBRF	CREB3 regulatory factor	3.69492	0.319465	0.622784	0.0895734	0.165439
RP11-144G6.12		3.69123	2.92143	1.95413	0.339911	0.980939
DDX50	DExD-box helicase 50	3.69075	21.1379	29.9333	5.15695	8.68069
CKAP2L	cytoskeleton associated protein 2 like	3.69029	13.6753	22.7775	4.09936	5.77869
RP11-562A8.5		3.69023	21.7473	16.4489	4.33949	6.01114
ANXA1	annexin A1	3.69016	157.523	158.982	33.57	52.1999
ACAP2	ArfGAP with coiled-coil, ankyrin repeat and PH domains 2	3.68999	1.96279	2.48283	0.489263	0.715516
MTIF2	mitochondrial translational initiation factor 2	3.68927	47.3988	34.3481	11.547	10.6111
LL0XNC01-237H1.2		3.68016	3.0784	2.39547	0.390012	1.09739
STRN	striatin	3.67651	6.84594	5.99078	1.47824	2.01331
ZFR	zinc finger RNA binding protein	3.67365	49.8448	32.715	11.8842	10.5893
FBXO3	F-box protein 3	3.67207	1.83192	1.91899	0.396462	0.625008
TRIP11	thyroid hormone receptor interactor 11	3.67063	4.90711	8.49388	1.13964	2.51122
PTPN11	protein tyrosine phosphatase non-receptor type 11	3.6705	35.2587	34.0563	7.53056	11.3538
IMPA1	inositol monophosphatase 1	3.66885	3.85453	3.29773	0.732513	1.21695
NT5DC4	5'-nucleotidase domain containing 4	3.66824	1.07012	1.4839	0.296332	0.399921
CHM	CHM Rab escort protein	3.66327	1.24397	1.88682	0.212977	0.641667
SMG1	SMG1 nonsense mediated mRNA decay associated PI3K related kinase	3.66293	5.7797	4.92621	0.827497	2.09527
RP11-483I13.5		3.65936	12.1672	6.79382	2.65713	2.52438
TXLNG	taxilin gamma	3.657	71.3526	53.9952	18.3788	15.8974
SOCS4	suppressor of cytokine signaling 4	3.65611	2.79707	4.06165	0.554211	1.32175
AC009228.1		3.65374	7.26245	6.18997	1.29206	2.38977
TUG1	taurine up-regulated 1	3.65331	5.41494	6.21282	1.16006	2.02275
UBL3	ubiquitin like 3	3.6529	3.72745	3.86308	0.907152	1.1708
RASA1	RAS p21 protein activator 1	3.65127	4.54299	3.77645	0.950151	1.32836
NSRP1	nuclear speckle splicing regulatory protein 1	3.65125	122.285	87.6508	31.1154	26.3814
AC004549.6		3.65	3.44658	3.69477	0.80455	1.15199
ENC1	ectodermal-neural cortex 1	3.64716	2.85019	1.13511	0.477739	0.614971
IREB2	iron responsive element binding protein 2	3.64392	4.2438	3.35051	0.954157	1.12995
GOLGB1	golgin B1	3.64274	30.2125	30.7434	7.42059	9.31293
PUM3	pumilio RNA binding family member 3	3.64102	46.0979	29.2962	12.2156	8.49127
TEAD1	TEA domain transcription factor 1	3.63747	4.55878	2.5691	1.03532	0.924253
LRPPRC	leucine rich pentatricopeptide repeat containing	3.63629	15.4194	13.5175	3.60691	4.35091
TTC14	tetratricopeptide repeat domain 14	3.63548	1.7469	2.78973	0.416354	0.831524
AC008074.1		3.63544	9.35791	7.86442	1.90702	2.83033
PSME4	proteasome activator subunit 4	3.63401	5.9443	3.75002	1.41311	1.25455
SERINC1	serine incorporator 1	3.63362	18.5615	17.8919	4.55453	5.47772
AL022067.1		3.63358	21.4211	22.1603	4.58746	7.40659
BORA	BORA aurora kinase A activator	3.63343	2.27856	4.34897	0.704372	1.11967
ZNF124	zinc finger protein 124	3.63096	0.629165	0.390556	0.14674	0.1341
ERCC8	ERCC excision repair 8, CSA ubiquitin ligase complex subunit	3.63072	1.18598	1.14229	0.220319	0.420952
RNMT	RNA guanine-7 methyltransferase	3.63017	4.67631	3.6229	0.975705	1.31047
TMEM64	transmembrane protein 64	3.62751	0.632691	0.628812	0.163103	0.184657
SCAF11	SR-related CTD associated factor 11	3.62369	16.6363	12.8887	3.5866	4.56118
LCORL	ligand dependent nuclear receptor corepressor like	3.62348	2.23007	1.37	0.560112	0.433428
AP4E1	adaptor related protein complex 4 subunit epsilon 1	3.62331	4.44552	3.18282	0.870677	1.23467
RAB3GAP2	RAB3 GTPase activating non-catalytic protein subunit 2	3.62297	3.79644	3.69432	0.914895	1.15268
RP11-488L18.4		3.62268	4.0817	3.25436	0.681919	1.34312
AGL	amylo-alpha-1, 6-glucosidase, 4-alpha-glucanotransferase	3.62059	1.68481	1.65083	0.414779	0.50652
RP11-513D5.2		3.61899	6.39942	3.56455	1.35755	1.39569
ARMT1	acidic residue methyltransferase 1	3.617	16.6915	18.5045	3.82736	5.90338
GPD2	glycerol-3-phosphate dehydrogenase 2	3.61669	3.79142	4.31291	0.926381	1.31443
JMY	junction mediating and regulatory protein, p53 cofactor	3.61536	2.77873	5.28885	0.680109	1.55136
FAM126A	family with sequence similarity 126 member A	3.61475	1.6839	1.97485	0.365722	0.64645
WWC2	WW and C2 domain containing 2	3.61413	6.8666	5.61549	1.49275	1.96094
FAM217B	family with sequence similarity 217 member B	3.61355	2.78476	2.4423	0.781715	0.664802
FAM133B	family with sequence similarity 133 member B	3.6133	15.9447	14.4827	4.07684	4.3441
ZNF83	zinc finger protein 83	3.61231	1.23499	1.36582	0.275214	0.444771
GPRC5D	G protein-coupled receptor class C group 5 member D	3.61179	4.48219	6.59198	0.655225	2.41089
PDS5B	PDS5 cohesin associated factor B	3.60824	9.65518	14.0305	2.34398	4.22033
VCPKMT	valosin containing protein lysine methyltransferase	3.60749	1.28865	1.33392	0.215029	0.51195
TSNAX	translin associated factor X	3.60674	4.3829	3.68775	0.991247	1.24641
JKAMP	JNK1/MAPK8 associated membrane protein	3.60514	1.59618	1.99655	0.380934	0.615624
DCAF13	DDB1 and CUL4 associated factor 13	3.60131	20.2636	15.1798	5.00376	4.83805
PNN	pinin, desmosome associated protein	3.60033	477.395	447.016	137.021	119.736
CAND1	cullin associated and neddylation dissociated 1	3.59943	5.021	3.60152	1.30521	1.09031
SCAMP1	secretory carrier membrane protein 1	3.5989	1.94806	1.98797	0.519252	0.574424
MYO1B	myosin IB	3.59876	7.90684	11.966	2.02408	3.49806
TTC3	tetratricopeptide repeat domain 3	3.59814	9.27384	8.16286	1.93357	2.91246
AC025918.2		3.59781	121.084	104.948	29.6127	33.2124
LMBRD2	LMBR1 domain containing 2	3.59655	1.67207	1.16671	0.380437	0.40887
NIPAL1	NIPA like domain containing 1	3.59631	2.06734	1.45615	0.510841	0.46891
MPHOSPH10	M-phase phosphoprotein 10	3.59596	53.2487	23.9753	13.8138	7.66142
SRSF11	serine and arginine rich splicing factor 11	3.59535	177.154	132.103	39.0662	46.9498
FAM83B	family with sequence similarity 83 member B	3.5947	1.94768	3.24796	0.418583	1.02678
ZNF561	zinc finger protein 561	3.59355	1.56805	0.956868	0.313175	0.389448
NEK1	NIMA related kinase 1	3.59169	5.63857	4.61618	1.42451	1.43062
PPM1L	protein phosphatase, Mg2+/Mn2+ dependent 1L	3.5916	0.412538	0.226772	0.0857946	0.0922069
CDK5R1	cyclin dependent kinase 5 regulatory subunit 1	3.59117	0.91844	0.489473	0.229882	0.162167
TVP23B	trans-golgi network vesicle protein 23 homolog B	3.58912	11.4866	9.44968	2.65718	3.17609
OTUD4	OTU deubiquitinase 4	3.58754	5.08682	3.87467	1.27677	1.22118
SLC38A1	solute carrier family 38 member 1	3.58711	16.2328	14.8969	3.84598	4.83222
EML5	EMAP like 5	3.58703	0.962971	0.893173	0.227637	0.289823
PARP14	poly(ADP-ribose) polymerase family member 14	3.58624	5.51119	12.6561	1.71224	3.35361
ZNF484	zinc finger protein 484	3.58454	0.897299	0.834889	0.182702	0.300536
BEND6	BEN domain containing 6	3.58446	0.41611	0.480838	0.0790772	0.171155
RP5-1047A19.4		3.58301	5.1495	6.18237	0.838807	2.32387
HERC4	HECT and RLD domain containing E3 ubiquitin protein ligase 4	3.58223	1.62625	1.82742	0.453121	0.51099
NEXN	nexilin F-actin binding protein	3.58169	6.62494	14.3351	1.35308	4.49892
ZNF558	zinc finger protein 558	3.58113	1.16015	1.15407	0.17098	0.475247
APPBP2	amyloid beta precursor protein binding protein 2	3.57968	0.601684	0.563369	0.164058	0.161404
RP11-156E6.1		3.57945	0.793591	0.537255	0.175949	0.195853
METAP2	methionyl aminopeptidase 2	3.57589	231.931	223.73	63.7998	63.6262
UFM1	ubiquitin fold modifier 1	3.57421	16.081	16.5557	3.79833	5.33282
ZC3H15	zinc finger CCCH-type containing 15	3.57352	125.438	94.3191	26.0652	35.4307
CTC-498J12.3		3.57279	2.76519	2.58209	0.856364	0.640307
UTP14C	UTP14C small subunit processome component	3.57202	6.43091	5.30148	1.35866	1.92586
BNIP2	BCL2 interacting protein 2	3.57178	6.07882	8.75625	1.37702	2.77639
ZNF614	zinc finger protein 614	3.57075	2.2778	1.38201	0.608132	0.416811
GIN1	gypsy retrotransposon integrase 1	3.57071	0.942123	0.817723	0.264158	0.228698
U2SURP	U2 snRNP associated SURP domain containing	3.57034	67.9619	53.0265	19.22	14.6671
ZNF813	zinc finger protein 813	3.56941	0.817196	0.808481	0.235898	0.219549
PDE8A	phosphodiesterase 8A	3.56905	3.60378	1.8688	0.821831	0.711511
CTD-2331H12.8		3.56877	3.21962	2.11216	0.861591	0.632422
MON2	MON2 homolog, regulator of endosome-to-Golgi trafficking	3.56747	0.980095	0.776221	0.271337	0.220978
PGAP1	post-GPI attachment to proteins inositol deacylase 1	3.56703	0.303689	0.361563	0.0865692	0.0999311
TEFM	transcription elongation factor, mitochondrial	3.56654	2.6545	2.4834	0.639617	0.800969
BLOC1S6	biogenesis of lysosomal organelles complex 1 subunit 6	3.56604	5.836	4.08783	1.41629	1.36658
PPP1R12A	protein phosphatase 1 regulatory subunit 12A	3.56563	13.5165	13.2177	3.16967	4.32809
USP33	ubiquitin specific peptidase 33	3.56458	8.21607	7.63845	2.06527	2.38251
VEZT	vezatin, adherens junctions transmembrane protein	3.56427	5.71252	5.29981	1.26572	1.82393
ZNF675	zinc finger protein 675	3.5642	0.890069	0.788018	0.217089	0.253729
PRPF38B	pre-mRNA processing factor 38B	3.56416	110.014	74.9318	27.48	24.4105
PREPL	prolyl endopeptidase like	3.56412	2.95497	2.15714	0.722652	0.711671
UGP2	UDP-glucose pyrophosphorylase 2	3.56403	11.9234	11.575	3.6285	2.96472
ZMAT3	zinc finger matrin-type 3	3.56387	0.254448	0.25323	0.0763501	0.066101
UTP15	UTP15 small subunit processome component	3.56089	6.41195	4.23791	1.42727	1.56351
TRMT10A	tRNA methyltransferase 10A	3.56088	9.28502	5.6091	2.03501	2.1477
ATG2B	autophagy related 2B	3.55969	1.17133	1.93022	0.239212	0.632088
GK	glycerol kinase	3.55794	0.662889	0.607739	0.178655	0.178469
TBCK	TBC1 domain containing kinase	3.55571	1.4328	0.879286	0.29162	0.358627
ARFGEF1	ADP ribosylation factor guanine nucleotide exchange factor 1	3.55559	3.16939	3.34678	0.74225	1.0904
SLTM	SAFB like transcription modulator	3.55337	84.0329	72.5247	18.9829	25.0761
GNAI3	G protein subunit alpha i3	3.55255	3.05192	2.04249	0.780541	0.653472
AGGF1	angiogenic factor with G-patch and FHA domains 1	3.55219	13.5675	16.711	3.87847	4.64543
SMARCA5-AS1	SMARCA5 antisense RNA 1	3.55173	23.717	26.5088	5.57225	8.56895
PTCD2	pentatricopeptide repeat domain 2	3.55082	0.738394	0.468212	0.139817	0.199993
PHF3	PHD finger protein 3	3.54935	27.5243	29.5362	6.27684	9.79947
LMAN1	lectin, mannose binding 1	3.54816	30.0565	30.8225	7.43873	9.71916
FYTTD1	forty-two-three domain containing 1	3.5466	6.47102	6.77416	1.48212	2.25249
INTS8	integrator complex subunit 8	3.54511	4.98011	2.64298	1.25461	0.895703
CCDC91	coiled-coil domain containing 91	3.54406	19.5269	16.5581	4.14419	6.03763
COQ10B	coenzyme Q10B	3.54363	3.061	3.32029	0.676408	1.12437
SNX14	sorting nexin 14	3.54362	3.88173	4.37	0.834427	1.49419
ZNF441	zinc finger protein 441	3.54153	0.530537	1.20041	0.139601	0.349155
MMS22L	MMS22 like, DNA repair protein	3.54067	1.04325	0.850596	0.246696	0.288187
TRMT11	tRNA methyltransferase 11 homolog	3.54015	11.2611	9.96838	2.55986	3.43693
KRIT1	KRIT1 ankyrin repeat containing	3.54003	3.59178	6.14645	0.854707	1.89618
RALGPS2	Ral GEF with PH domain and SH3 binding motif 2	3.53942	3.29703	2.35388	0.818481	0.778082
CUL2	cullin 2	3.53816	4.53645	3.44333	1.15901	1.09634
SLC19A2	solute carrier family 19 member 2	3.53741	1.02928	0.961123	0.180557	0.382115
CCDC112	coiled-coil domain containing 112	3.53639	11.5864	15.1588	2.18322	5.37966
RBM25	RNA binding motif protein 25	3.53624	99.4713	106.544	24.7944	33.4639
THUMPD1	THUMP domain containing 1	3.5359	8.94675	8.32045	2.36768	2.51572
PCMTD1	protein-L-isoaspartate (D-aspartate) O-methyltransferase domain containing 1	3.53434	1.4068	2.95015	0.362051	0.870696
SGMS2	sphingomyelin synthase 2	3.53433	1.60311	1.33304	0.43407	0.39668
PEX1	peroxisomal biogenesis factor 1	3.53241	1.7034	2.1577	0.426927	0.666124
NAA15	N-alpha-acetyltransferase 15, NatA auxiliary subunit	3.53046	21.5575	14.5121	5.80488	4.4118
CLIP1	CAP-Gly domain containing linker protein 1	3.52776	22.9589	33.8754	6.24689	9.86373
RPS6KB1	ribosomal protein S6 kinase B1	3.52557	6.38165	5.71623	1.55687	1.87459
STRN3	striatin 3	3.52229	8.83308	15.4972	1.85416	5.05337
KAT2B	lysine acetyltransferase 2B	3.52094	2.10942	2.22559	0.235295	0.995913
WDR47	WD repeat domain 47	3.52088	3.09586	3.12949	0.499529	1.26859
CBX3	chromobox 3	3.51888	144.335	158.978	37.0458	49.15
DYX1C1-CCPG1	DNAAF4-CCPG1 readthrough (NMD candidate)	3.51716	23.9624	24.2663	6.45958	7.25284
ZNF12	zinc finger protein 12	3.51694	2.48749	3.02303	0.597854	0.968995
KB-431C1.5		3.51613	12.6921	10.7803	2.72958	3.94605
DCUN1D1	defective in cullin neddylation 1 domain containing 1	3.5153	3.95814	4.23951	0.884258	1.44774
MTERF3	mitochondrial transcription termination factor 3	3.51321	11.1355	6.0279	2.37176	2.51362
BROX	BRO1 domain and CAAX motif containing	3.51216	3.35917	3.50975	0.73943	1.21633
ZNF565	zinc finger protein 565	3.51166	1.0784	0.604193	0.204938	0.274206
SESTD1	SEC14 and spectrin domain containing 1	3.51008	3.57692	3.12085	0.947441	0.960714
SMAD9	SMAD family member 9	3.50982	0.440152	0.294027	0.0643432	0.144836
RAB3IP	RAB3A interacting protein	3.50951	1.04986	1.03725	0.268615	0.326085
TNKS2	tankyrase 2	3.50398	7.29084	10.0681	1.49519	3.45886
RP4-621N11.2		3.50172	4.8419	4.28331	0.5019	2.10402
FCHO2	FCH and mu domain containing endocytic adaptor 2	3.50082	2.77249	2.43189	0.841408	0.645207
RAI14	retinoic acid induced 14	3.49916	22.1446	15.0973	4.98199	5.66111
MED13	mediator complex subunit 13	3.49803	3.12834	2.66118	0.676809	0.97827
TMEM123	transmembrane protein 123	3.49764	7.81829	11.5057	1.60068	3.92418
FKBP14	FKBP prolyl isomerase 14	3.49574	1.23697	2.49188	0.276558	0.79013
RBL1	RB transcriptional corepressor like 1	3.49429	5.56507	5.18744	0.785456	2.29171
RABGAP1L	RAB GTPase activating protein 1 like	3.49387	1.16953	1.72426	0.258918	0.569331
GPATCH2	G-patch domain containing 2	3.49255	3.50259	2.91901	0.683695	1.15496
ALG11	ALG11 alpha-1,2-mannosyltransferase	3.49153	3.00932	2.6803	0.658588	0.97096
STARD4	StAR related lipid transfer domain containing 4	3.49069	1.77837	2.11051	0.485885	0.628188
WDR43	WD repeat domain 43	3.49065	154.866	88.1446	36.4402	33.1774
POT1	protection of telomeres 1	3.48892	0.799565	1.05856	0.262268	0.270311
MLLT10	MLLT10 histone lysine methyltransferase DOT1L cofactor	3.48734	2.39014	2.55188	0.434779	0.982352
YY2	YY2 transcription factor	3.48679	0.824747	1.06939	0.147778	0.395454
PANK3	pantothenate kinase 3	3.4866	6.91987	8.04471	1.73677	2.55526
BRWD3	bromodomain and WD repeat domain containing 3	3.48638	7.08276	9.17658	1.55197	3.1117
DDX18	DEAD-box helicase 18	3.48638	15.9396	13.8071	4.90607	3.6262
PLK2	polo like kinase 2	3.4856	15.7071	23.509	3.76886	7.48203
PLEKHA1	pleckstrin homology domain containing A1	3.4848	0.517018	0.604231	0.0997889	0.221965
UBA3	ubiquitin like modifier activating enzyme 3	3.48325	2.95734	5.69781	0.753333	1.73146
BAZ2B	bromodomain adjacent to zinc finger domain 2B	3.48028	2.69836	4.29294	0.694172	1.31466
SLC18A2	solute carrier family 18 member A2	3.47938	0.64198	0.763227	0.187466	0.216401
RAD51AP1	RAD51 associated protein 1	3.47758	12.3725	19.5332	2.70635	6.46833
SNX2	sorting nexin 2	3.47743	15.373	20.9137	3.92993	6.50501
MAP3K2	mitogen-activated protein kinase kinase kinase 2	3.47669	2.79787	2.95273	0.579169	1.07487
RAD21-AS1	RAD21 antisense RNA 1	3.4762	20.4694	34.6077	4.83654	11.0075
ZNF33B	zinc finger protein 33B	3.4757	2.14987	2.63336	0.474314	0.901881
CCDC191	coiled-coil domain containing 191	3.47563	0.925665	0.40432	0.208318	0.174342
[truncated: 2,811 more rows]

[truncated: 3 more sheets: Table S10, Table S11, Table S12]
